# Supplementary material for: Identification and analysis of sucrose synthase gene family associated with polysaccharide biosynthesis in Dendrobium catenatum by transcriptomic analysis
Source: PeerJ. 2022 Apr 5;10:e13222. doi: 10.7717/peerj.13222 (PMC8992646; doi:10.7717/peerj.13222)
Supplement: Table S3 [file peerj-10-13222-s008.xls]

## Sheet: Table S3
Gene_id	Chromosome	Strand	Original_span	Assembled_span
AT1G31200.1-D1	scaffold6150	+	30897~31417	29945~31666
AT2G35120.1-D1	scaffold120	-	10187~44943	9984~78768
Bradi1g03485.1-D5	Scaffold63750	+	762~1423	106~1635
Bradi2g13106.1-D1	scaffold29749	+	3605~5498	537~9984
Bradi2g26900.1-D1	scaffold3649	+	57503~78164	38191~78334
Bradi2g40650.1-D5	scaffold1588	+	138985~139920	756~140227
Bradi3g24730.1-D1	scaffold3	+	2625~13710	1824~14131
Bradi5g14530.1-D2	scaffold2085	-	49423~51089	49042~51089
Dendrobium_GLEAN_10000235	Scaffold173795	-	153~461	1~477
Dendrobium_GLEAN_10000266	Scaffold166717	+	151~459	51~506
Dendrobium_GLEAN_10000304	Scaffold159334	+	23~334	15~515
Dendrobium_GLEAN_10000389	Scaffold145385	-	101~391	5~582
Dendrobium_GLEAN_10000426	Scaffold138290	+	158~604	2~614
Dendrobium_GLEAN_10000461	Scaffold132720	+	80~613	14~613
Dendrobium_GLEAN_10000566	Scaffold118453	-	41~564	41~724
Dendrobium_GLEAN_10000578	Scaffold117463	-	24~419	1~611
Dendrobium_GLEAN_10000617	Scaffold113811	+	379~668	321~668
Dendrobium_GLEAN_10000626	Scaffold113303	-	38~463	12~759
Dendrobium_GLEAN_10000649	Scaffold110289	-	139~686	9~686
Dendrobium_GLEAN_10000675	Scaffold107759	-	154~477	16~761
Dendrobium_GLEAN_10000720	Scaffold103485	+	30~579	1~816
Dendrobium_GLEAN_10000737	Scaffold101766	-	417~731	6~836
Dendrobium_GLEAN_10000738	Scaffold101574	-	57~568	57~787
Dendrobium_GLEAN_10000788	Scaffold97429	-	154~746	57~837
Dendrobium_GLEAN_10000796	Scaffold96850	-	494~802	422~877
Dendrobium_GLEAN_10000878	Scaffold90980	+	249~745	1~937
Dendrobium_GLEAN_10000879	Scaffold90979	-	186~557	186~925
Dendrobium_GLEAN_10000896	Scaffold89463	+	34~514	19~514
Dendrobium_GLEAN_10000921	Scaffold87995	-	268~727	1~944
Dendrobium_GLEAN_10000945	Scaffold85961	-	31~875	3~991
Dendrobium_GLEAN_10000958	Scaffold84935	+	171~611	168~999
Dendrobium_GLEAN_10000962	Scaffold84584	+	20~459	6~1003
Dendrobium_GLEAN_10000977	Scaffold83728	+	394~756	148~756
Dendrobium_GLEAN_10000997	Scaffold82641	-	553~861	501~1053
Dendrobium_GLEAN_10001021	Scaffold81208	-	158~877	3~1074
Dendrobium_GLEAN_10001048	Scaffold79511	+	106~432	12~1108
Dendrobium_GLEAN_10001056	Scaffold79219	+	310~1060	289~1060
Dendrobium_GLEAN_10001076	Scaffold78417	+	43~387	1~1052
Dendrobium_GLEAN_10001081	Scaffold78275	+	159~1059	1~1062
Dendrobium_GLEAN_10001091	Scaffold77646	-	158~826	4~1061
Dendrobium_GLEAN_10001120	Scaffold75940	+	375~863	203~863
Dendrobium_GLEAN_10001128	Scaffold75542	+	150~545	56~578
Dendrobium_GLEAN_10001141	Scaffold75164	-	162~1147	2~1198
Dendrobium_GLEAN_10001142	Scaffold75126	-	160~1035	7~1200
Dendrobium_GLEAN_10001148	Scaffold74733	+	64~507	6~834
Dendrobium_GLEAN_10001180	Scaffold72987	-	245~948	28~1235
Dendrobium_GLEAN_10001188	Scaffold72429	+	344~1261	291~1261
Dendrobium_GLEAN_10001211	Scaffold71482	-	270~858	188~1089
Dendrobium_GLEAN_10001213	Scaffold71444	-	479~1225	11~1225
Dendrobium_GLEAN_10001216	Scaffold71408	-	248~1127	150~1274
Dendrobium_GLEAN_10001233	Scaffold70236	-	60~1157	57~1287
Dendrobium_GLEAN_10001251	Scaffold69419	-	188~1251	1~1367
Dendrobium_GLEAN_10001277	Scaffold68070	-	210~906	5~1190
Dendrobium_GLEAN_10001280	Scaffold67966	+	430~1387	426~1387
Dendrobium_GLEAN_10001293	Scaffold67191	-	903~1306	903~1405
Dendrobium_GLEAN_10001295	Scaffold66965	+	702~1218	657~1426
Dendrobium_GLEAN_10001305	Scaffold66467	+	38~1236	38~1288
Dendrobium_GLEAN_10001313	Scaffold66091	+	14~1279	2~1279
Dendrobium_GLEAN_10001318	Scaffold65908	+	31~1056	31~1477
Dendrobium_GLEAN_10001323	Scaffold65725	+	1003~1365	793~1476
Dendrobium_GLEAN_10001347	Scaffold64792	-	189~558	189~989
Dendrobium_GLEAN_10001356	Scaffold64612	-	73~624	73~1565
Dendrobium_GLEAN_10001360	Scaffold64501	-	195~503	88~503
Dendrobium_GLEAN_10001365	Scaffold64283	-	629~982	66~1125
Dendrobium_GLEAN_10001381	Scaffold63681	+	229~1388	2~1640
Dendrobium_GLEAN_10001385	Scaffold63615	-	650~1230	493~1230
Dendrobium_GLEAN_10001394	Scaffold63439	-	266~1447	39~1553
Dendrobium_GLEAN_10001395	Scaffold63411	-	126~746	1~1035
Dendrobium_GLEAN_10001400	Scaffold63260	-	454~1557	130~1658
Dendrobium_GLEAN_10001403	Scaffold63208	-	480~1481	54~1523
Dendrobium_GLEAN_10001404	Scaffold63174	-	257~1139	7~1676
Dendrobium_GLEAN_10001405	Scaffold63171	-	276~983	6~983
Dendrobium_GLEAN_10001406	Scaffold63156	-	421~1237	4~1454
Dendrobium_GLEAN_10001408	Scaffold63127	-	211~1678	14~1678
Dendrobium_GLEAN_10001425	Scaffold62560	+	93~1194	2~1405
Dendrobium_GLEAN_10001432	Scaffold62210	-	111~1182	5~1733
Dendrobium_GLEAN_10001435	Scaffold62151	-	1241~1552	1136~1664
Dendrobium_GLEAN_10001484	Scaffold60756	-	288~712	288~1260
Dendrobium_GLEAN_10001490	Scaffold60726	-	804~1309	25~1515
Dendrobium_GLEAN_10001507	Scaffold60211	-	734~1789	264~1902
Dendrobium_GLEAN_10001549	Scaffold59396	+	414~980	9~1234
Dendrobium_GLEAN_10001589	Scaffold58999	+	1069~1973	64~1973
Dendrobium_GLEAN_10001594	Scaffold58925	+	325~1855	258~1855
Dendrobium_GLEAN_10001612	Scaffold58802	-	838~1421	687~1465
Dendrobium_GLEAN_10001618	Scaffold58711	-	20~1792	1~1792
Dendrobium_GLEAN_10001644	Scaffold58532	+	1118~1618	808~1938
Dendrobium_GLEAN_10001703	Scaffold58016	+	610~1761	524~1935
Dendrobium_GLEAN_10001745	scaffold57617	-	425~1231	89~1762
Dendrobium_GLEAN_10001769	Scaffold57363	+	25~1851	2~2113
Dendrobium_GLEAN_10001781	Scaffold57304	-	1499~2005	1474~2119
Dendrobium_GLEAN_10001811	Scaffold57065	+	240~1006	240~1164
Dendrobium_GLEAN_10001863	scaffold56540	-	689~1945	7~2159
Dendrobium_GLEAN_10001869	Scaffold56454	-	1475~2052	29~2184
Dendrobium_GLEAN_10001915	Scaffold56180	+	406~2156	1~2156
Dendrobium_GLEAN_10001954	scaffold51988	-	593~2145	196~2184
Dendrobium_GLEAN_10002025	Scaffold55379	+	607~1682	607~1823
Dendrobium_GLEAN_10002026	scaffold55373	-	79~495	10~593
Dendrobium_GLEAN_10002028	Scaffold55357	-	110~1860	3~2113
Dendrobium_GLEAN_10002036	Scaffold55298	-	1627~2192	1427~2302
Dendrobium_GLEAN_10002043	Scaffold55265	-	69~859	48~877
Dendrobium_GLEAN_10002078	Scaffold55022	-	170~1750	170~1855
Dendrobium_GLEAN_10002101	Scaffold54880	+	343~1473	125~1584
Dendrobium_GLEAN_10002136	Scaffold54614	+	244~2094	1~2376
Dendrobium_GLEAN_10002145	Scaffold54553	-	556~1944	166~1968
Dendrobium_GLEAN_10002172	Scaffold54371	-	1583~1960	1566~2047
Dendrobium_GLEAN_10002182	scaffold50331	+	286~1874	286~2310
Dendrobium_GLEAN_10002203	scaffold53711	-	1024~1974	1024~1994
Dendrobium_GLEAN_10002254	scaffold51142	-	801~2313	103~2392
Dendrobium_GLEAN_10002269	Scaffold53843	-	361~1624	361~1696
Dendrobium_GLEAN_10002271	scaffold53836	-	1528~2129	3~2129
Dendrobium_GLEAN_10002291	scaffold50679	-	1248~2251	1076~2397
Dendrobium_GLEAN_10002308	Scaffold53596	-	1566~1965	901~1965
Dendrobium_GLEAN_10002311	scaffold53571	+	242~1084	227~1084
Dendrobium_GLEAN_10002356	Scaffold53262	+	551~1706	361~1706
Dendrobium_GLEAN_10002394	Scaffold52992	+	25~1971	25~2422
Dendrobium_GLEAN_10002404	Scaffold52880	-	30~2457	23~2567
Dendrobium_GLEAN_10002412	Scaffold52843	+	617~1400	617~2270
Dendrobium_GLEAN_10002443	scaffold49004	-	667~1060	331~1174
Dendrobium_GLEAN_10002465	scaffold49657	-	620~2386	620~2580
Dendrobium_GLEAN_10002470	scaffold52425	+	696~2347	13~2347
Dendrobium_GLEAN_10002471	Scaffold52423	+	1801~2190	665~2475
Dendrobium_GLEAN_10002483	scaffold51170	+	1609~2578	6~2578
Dendrobium_GLEAN_10002484	Scaffold52338	-	786~2257	152~2579
Dendrobium_GLEAN_10002487	Scaffold52335	+	62~1809	62~1852
Dendrobium_GLEAN_10002494	scaffold52300	+	230~649	12~790
Dendrobium_GLEAN_10002513	Scaffold52189	-	1996~2522	1705~2522
Dendrobium_GLEAN_10002519	scaffold55085	+	58~1684	58~1990
Dendrobium_GLEAN_10002590	Scaffold51766	-	293~1027	1~1878
Dendrobium_GLEAN_10002599	Scaffold51689	-	351~2296	2~2488
Dendrobium_GLEAN_10002638	scaffold51518	+	440~1164	348~1164
Dendrobium_GLEAN_10002690	Scaffold51163	-	96~419	1~463
Dendrobium_GLEAN_10002695	Scaffold51152	-	1839~2441	1659~2646
Dendrobium_GLEAN_10002702	scaffold48740	+	112~1132	112~2769
Dendrobium_GLEAN_10002708	Scaffold51112	-	1546~2733	1319~2733
Dendrobium_GLEAN_10002732	Scaffold50937	-	695~1618	695~1957
Dendrobium_GLEAN_10002743	scaffold48509	-	1346~2416	885~2794
Dendrobium_GLEAN_10002745	scaffold51116	-	100~2613	22~2624
Dendrobium_GLEAN_10002759	scaffold48202	+	294~1727	194~1874
Dendrobium_GLEAN_10002788	Scaffold50594	-	733~2427	254~2427
Dendrobium_GLEAN_10002792	scaffold50566	-	803~1330	803~1706
Dendrobium_GLEAN_10002795	scaffold50539	+	451~2660	145~2841
Dendrobium_GLEAN_10002814	Scaffold50381	-	579~2033	245~2847
Dendrobium_GLEAN_10002821	Scaffold50286	+	51~1496	51~2875
Dendrobium_GLEAN_10002834	scaffold50246	-	1130~2576	120~2576
Dendrobium_GLEAN_10002845	scaffold50189	+	835~1226	40~1491
Dendrobium_GLEAN_10002847	Scaffold50150	-	1287~2392	1240~2638
Dendrobium_GLEAN_10002848	scaffold50139	-	297~2631	67~2892
Dendrobium_GLEAN_10002854	scaffold48515	+	1777~2817	1617~2887
Dendrobium_GLEAN_10002866	Scaffold49991	+	1859~2767	1529~2767
Dendrobium_GLEAN_10002879	Scaffold49931	-	678~2323	538~2323
Dendrobium_GLEAN_10002886	scaffold49889	-	258~2674	53~2674
Dendrobium_GLEAN_10002888	Scaffold49888	+	2410~2885	2083~2919
Dendrobium_GLEAN_10002889	scaffold52675	-	2422~2853	1370~2909
Dendrobium_GLEAN_10002890	Scaffold49873	+	1907~2615	1658~2797
Dendrobium_GLEAN_10002908	Scaffold49690	-	582~1768	186~1768
Dendrobium_GLEAN_10002933	scaffold49627	-	800~2561	575~2910
Dendrobium_GLEAN_10002940	Scaffold49472	-	651~1394	24~2322
Dendrobium_GLEAN_10002946	scaffold49414	+	2268~2682	2257~2985
Dendrobium_GLEAN_10002952	Scaffold49341	-	1088~2614	908~2995
Dendrobium_GLEAN_10002977	scaffold49206	-	1314~2947	1314~2991
Dendrobium_GLEAN_10002983	scaffold47099	-	165~2275	165~2751
Dendrobium_GLEAN_10002984	scaffold52314	+	240~2773	11~3017
Dendrobium_GLEAN_10002986	Scaffold49104	+	1653~2997	1451~2997
Dendrobium_GLEAN_10002995	Scaffold49040	-	923~2662	186~2760
Dendrobium_GLEAN_10003007	Scaffold48917	-	696~2387	523~2536
Dendrobium_GLEAN_10003009	scaffold50093	+	277~2038	267~2102
Dendrobium_GLEAN_10003030	Scaffold48722	-	525~1337	46~1680
Dendrobium_GLEAN_10003044	Scaffold48644	+	21~2888	1~3098
Dendrobium_GLEAN_10003050	scaffold52976	-	1782~2408	1534~3114
Dendrobium_GLEAN_10003060	scaffold46812	-	55~1654	55~3117
Dendrobium_GLEAN_10003065	scaffold51475	+	84~1424	4~1633
Dendrobium_GLEAN_10003066	scaffold48516	-	307~1816	1~2205
Dendrobium_GLEAN_10003099	scaffold46943	+	2292~2842	2~3055
Dendrobium_GLEAN_10003110	Scaffold48219	-	1813~2460	1142~3176
Dendrobium_GLEAN_10003121	Scaffold48155	-	1617~2315	1545~3179
Dendrobium_GLEAN_10003125	scaffold48152	+	1767~2893	1575~2893
Dendrobium_GLEAN_10003127	scaffold46822	+	631~2697	415~3184
Dendrobium_GLEAN_10003148	scaffold47991	+	82~2760	1~3220
Dendrobium_GLEAN_10003152	scaffold47511	+	1855~2986	1~3108
Dendrobium_GLEAN_10003153	scaffold46691	-	541~1041	173~1041
Dendrobium_GLEAN_10003162	Scaffold47940	+	495~2298	205~2298
Dendrobium_GLEAN_10003169	scaffold50349	-	148~2945	148~2988
Dendrobium_GLEAN_10003171	scaffold50161	+	152~3097	113~3237
Dendrobium_GLEAN_10003209	scaffold47598	+	2156~2470	1896~2649
Dendrobium_GLEAN_10003215	scaffold47573	-	335~3060	66~3128
Dendrobium_GLEAN_10003227	scaffold50114	+	160~2949	1~3238
Dendrobium_GLEAN_10003228	scaffold47478	-	1214~2879	1214~3213
Dendrobium_GLEAN_10003229	Scaffold47475	-	610~3177	610~3311
Dendrobium_GLEAN_10003235	scaffold47417	-	100~1721	100~3186
Dendrobium_GLEAN_10003259	scaffold45936	-	688~2360	688~3315
Dendrobium_GLEAN_10003260	Scaffold47309	-	15~1998	12~1998
Dendrobium_GLEAN_10003261	Scaffold47302	+	78~786	3~1125
Dendrobium_GLEAN_10003270	scaffold45562	-	737~1455	737~1523
Dendrobium_GLEAN_10003273	scaffold47206	-	2301~2849	1478~3365
Dendrobium_GLEAN_10003284	scaffold49605	+	70~989	18~2137
Dendrobium_GLEAN_10003293	scaffold48803	+	2624~3234	2294~3241
Dendrobium_GLEAN_10003309	scaffold46971	-	678~1003	531~3421
Dendrobium_GLEAN_10003320	scaffold46902	-	2961~3347	2604~3446
Dendrobium_GLEAN_10003326	scaffold46847	-	2089~3159	1971~3435
Dendrobium_GLEAN_10003336	scaffold49250	+	1771~3218	1566~3218
Dendrobium_GLEAN_10003340	scaffold49230	+	2508~3388	1213~3388
Dendrobium_GLEAN_10003350	scaffold48412	-	2250~3388	2250~3504
Dendrobium_GLEAN_10003356	scaffold48188	-	1048~2508	1048~3442
Dendrobium_GLEAN_10003359	Scaffold46654	+	562~2203	88~2443
Dendrobium_GLEAN_10003366	scaffold49121	+	318~2298	1~2706
Dendrobium_GLEAN_10003370	Scaffold46615	+	584~3039	1~3039
Dendrobium_GLEAN_10003377	scaffold46550	-	338~807	18~919
Dendrobium_GLEAN_10003386	scaffold46491	+	498~2182	421~2382
Dendrobium_GLEAN_10003388	Scaffold46482	+	1943~2635	1~3161
Dendrobium_GLEAN_10003397	scaffold44377	+	719~1559	50~1766
Dendrobium_GLEAN_10003406	Scaffold46442	+	1471~3536	839~3536
Dendrobium_GLEAN_10003429	scaffold45788	-	2529~3344	2365~3426
Dendrobium_GLEAN_10003433	scaffold46327	-	1147~3360	2~3503
Dendrobium_GLEAN_10003438	scaffold46308	-	60~3007	60~3098
Dendrobium_GLEAN_10003442	scaffold48335	-	382~3263	151~3314
Dendrobium_GLEAN_10003445	Scaffold46240	-	796~2827	796~3044
Dendrobium_GLEAN_10003457	Scaffold46181	-	914~3436	52~3567
Dendrobium_GLEAN_10003514	Scaffold45903	+	1994~2394	1~3323
Dendrobium_GLEAN_10003530	Scaffold45751	-	1692~1961	1431~2144
Dendrobium_GLEAN_10003538	Scaffold45717	-	962~3760	962~3783
Dendrobium_GLEAN_10003563	scaffold45611	-	1950~3395	1726~3605
Dendrobium_GLEAN_10003616	scaffold46668	-	792~3544	534~3667
Dendrobium_GLEAN_10003618	scaffold46860	-	1204~2128	5~3345
Dendrobium_GLEAN_10003621	scaffold44293	-	2191~2827	2105~2827
Dendrobium_GLEAN_10003630	scaffold45313	-	511~1610	11~1939
Dendrobium_GLEAN_10003646	scaffold45775	+	891~2522	26~2594
Dendrobium_GLEAN_10003670	Scaffold45189	-	960~1559	501~2335
Dendrobium_GLEAN_10003680	scaffold45149	+	1061~2744	996~2744
Dendrobium_GLEAN_10003686	Scaffold45115	-	1505~3809	2~3950
Dendrobium_GLEAN_10003704	scaffold45140	-	322~3086	19~3086
Dendrobium_GLEAN_10003723	scaffold45657	+	985~3850	468~3850
Dendrobium_GLEAN_10003735	scaffold43960	+	316~2673	119~2673
Dendrobium_GLEAN_10003745	scaffold45032	+	211~1263	121~2126
Dendrobium_GLEAN_10003748	Scaffold44924	+	638~2377	15~2654
Dendrobium_GLEAN_10003760	scaffold44837	+	1102~2173	803~2173
Dendrobium_GLEAN_10003763	scaffold44875	-	1142~2225	740~2573
Dendrobium_GLEAN_10003769	Scaffold44869	-	856~3431	609~4008
Dendrobium_GLEAN_10003781	Scaffold44824	+	392~730	4~1852
Dendrobium_GLEAN_10003806	Scaffold44760	-	2936~3657	2732~3657
Dendrobium_GLEAN_10003807	scaffold46115	+	65~4103	1~4103
Dendrobium_GLEAN_10003813	Scaffold44723	-	520~954	520~1510
Dendrobium_GLEAN_10003818	Scaffold44719	-	1530~1835	1530~2022
Dendrobium_GLEAN_10003828	scaffold45539	+	99~2567	2~2852
Dendrobium_GLEAN_10003829	scaffold44696	-	252~1103	1~3057
Dendrobium_GLEAN_10003833	Scaffold44688	+	2570~4093	2265~4131
Dendrobium_GLEAN_10003847	scaffold44910	-	228~3094	1~3390
Dendrobium_GLEAN_10003849	scaffold44612	-	2525~3879	2385~4144
Dendrobium_GLEAN_10003859	Scaffold44552	-	1107~1850	1107~1982
Dendrobium_GLEAN_10003868	Scaffold44520	-	1397~3131	854~3131
Dendrobium_GLEAN_10003897	Scaffold44439	-	619~4226	366~4226
Dendrobium_GLEAN_10003899	scaffold44784	+	662~1009	578~1664
Dendrobium_GLEAN_10003914	Scaffold44401	+	1603~2433	59~2603
Dendrobium_GLEAN_10003920	Scaffold44337	-	273~3655	10~3655
Dendrobium_GLEAN_10003951	scaffold44524	-	1980~2343	1492~3100
Dendrobium_GLEAN_10003956	scaffold42699	+	56~2649	22~2896
Dendrobium_GLEAN_10003961	scaffold44773	-	359~3496	193~3772
Dendrobium_GLEAN_10003973	scaffold45220	-	282~1153	138~1312
Dendrobium_GLEAN_10004017	Scaffold43980	-	514~2897	51~4406
Dendrobium_GLEAN_10004032	Scaffold43942	+	1464~4374	1102~4374
Dendrobium_GLEAN_10004038	scaffold43870	+	1321~1562	670~1612
Dendrobium_GLEAN_10004059	scaffold45075	-	22~3153	22~3342
Dendrobium_GLEAN_10004064	Scaffold43866	+	503~1066	503~1239
Dendrobium_GLEAN_10004077	scaffold43823	-	263~4162	263~4189
Dendrobium_GLEAN_10004118	Scaffold43744	-	639~3915	639~4406
Dendrobium_GLEAN_10004121	scaffold44410	+	988~3391	1~3993
Dendrobium_GLEAN_10004139	Scaffold43693	-	3902~4372	3300~4392
Dendrobium_GLEAN_10004149	Scaffold43642	-	3922~4291	3662~4565
Dendrobium_GLEAN_10004160	scaffold44778	+	576~4508	566~4508
Dendrobium_GLEAN_10004173	scaffold42715	+	517~1545	517~2154
Dendrobium_GLEAN_10004199	Scaffold43460	+	1492~3501	1013~4469
Dendrobium_GLEAN_10004216	scaffold44226	-	2870~4127	2740~4373
Dendrobium_GLEAN_10004218	scaffold42648	+	1436~2498	61~2886
Dendrobium_GLEAN_10004233	Scaffold43331	+	824~4661	19~4736
Dendrobium_GLEAN_10004251	Scaffold43300	+	1157~1675	29~1742
Dendrobium_GLEAN_10004254	Scaffold43291	+	2850~3852	2717~4070
Dendrobium_GLEAN_10004266	Scaffold43238	-	1399~2745	447~3126
Dendrobium_GLEAN_10004285	Scaffold43162	-	2242~4266	2242~4344
Dendrobium_GLEAN_10004287	Scaffold43157	-	166~3252	166~3505
Dendrobium_GLEAN_10004292	scaffold43147	-	3128~4395	2521~4499
Dendrobium_GLEAN_10004310	scaffold41689	-	962~3952	962~4626
Dendrobium_GLEAN_10004316	Scaffold43058	+	683~3943	683~4585
Dendrobium_GLEAN_10004317	Scaffold43056	+	2587~3777	591~4124
Dendrobium_GLEAN_10004324	scaffold44188	+	1708~2256	311~4860
Dendrobium_GLEAN_10004327	scaffold43023	-	2694~3908	2694~3925
Dendrobium_GLEAN_10004330	scaffold43009	-	114~4017	23~4700
Dendrobium_GLEAN_10004331	scaffold43009	+	1300~2142	613~4680
Dendrobium_GLEAN_10004358	scaffold42389	-	706~4781	454~4781
Dendrobium_GLEAN_10004415	scaffold42768	-	2932~4420	2932~4645
Dendrobium_GLEAN_10004447	scaffold40235	-	429~3791	32~4498
Dendrobium_GLEAN_10004449	Scaffold42623	+	2613~3510	2057~3923
Dendrobium_GLEAN_10004477	scaffold42434	+	426~4476	207~4895
Dendrobium_GLEAN_10004525	scaffold41090	+	2006~2839	1202~3526
Dendrobium_GLEAN_10004556	Scaffold42025	-	3684~4196	3444~4311
Dendrobium_GLEAN_10004562	scaffold43117	-	407~4539	407~4623
Dendrobium_GLEAN_10004572	scaffold42102	-	1032~1454	269~1611
Dendrobium_GLEAN_10004607	scaffold43044	-	692~3727	692~3771
Dendrobium_GLEAN_10004623	scaffold40336	+	870~5122	46~5122
Dendrobium_GLEAN_10004665	Scaffold41475	+	261~4719	118~4719
Dendrobium_GLEAN_10004678	scaffold41411	-	318~3059	36~5162
Dendrobium_GLEAN_10004710	Scaffold41284	+	2083~2853	207~5250
Dendrobium_GLEAN_10004747	scaffold41483	-	678~1216	530~1283
Dendrobium_GLEAN_10004755	scaffold41124	+	404~733	404~816
Dendrobium_GLEAN_10004782	scaffold40980	-	590~4413	590~4679
Dendrobium_GLEAN_10004786	scaffold40975	-	4045~4856	4045~5157
Dendrobium_GLEAN_10004793	Scaffold40954	+	175~1164	4~1605
Dendrobium_GLEAN_10004794	Scaffold40954	+	2333~3322	2200~3580
Dendrobium_GLEAN_10004810	Scaffold40909	+	629~2279	629~5360
Dendrobium_GLEAN_10004821	scaffold42751	+	395~860	387~1076
Dendrobium_GLEAN_10004830	scaffold41253	+	1417~1670	7~1953
Dendrobium_GLEAN_10004833	scaffold41995	+	70~2953	8~3241
Dendrobium_GLEAN_10004838	scaffold40781	-	501~5369	501~5420
Dendrobium_GLEAN_10004854	Scaffold40746	-	852~4337	563~5435
Dendrobium_GLEAN_10004862	scaffold40655	+	1838~2649	1673~4166
Dendrobium_GLEAN_10004880	scaffold40450	-	180~3862	180~3936
Dendrobium_GLEAN_10004896	scaffold40898	+	2737~3609	2706~5505
Dendrobium_GLEAN_10004899	scaffold39473	-	562~4333	16~4433
Dendrobium_GLEAN_10004905	Scaffold40532	+	50~4682	50~5454
Dendrobium_GLEAN_10004906	Scaffold40528	+	1343~4115	1227~4115
Dendrobium_GLEAN_10004915	scaffold40461	+	1163~4152	1163~4279
Dendrobium_GLEAN_10004926	scaffold40449	-	796~2022	342~3108
Dendrobium_GLEAN_10004931	scaffold40412	+	4155~5262	3858~5518
Dendrobium_GLEAN_10004938	scaffold40857	+	4993~5475	4816~5560
Dendrobium_GLEAN_10004951	scaffold40322	+	1639~2226	3~2450
Dendrobium_GLEAN_10004977	scaffold40201	+	3981~5391	3981~5561
Dendrobium_GLEAN_10004994	scaffold40413	-	648~2484	648~2696
Dendrobium_GLEAN_10004995	scaffold40421	-	244~1593	244~1664
Dendrobium_GLEAN_10005031	scaffold42352	+	2456~5504	2386~5708
Dendrobium_GLEAN_10005033	scaffold40051	+	1663~2733	1208~2888
Dendrobium_GLEAN_10005062	scaffold39740	-	2437~3212	2437~3350
Dendrobium_GLEAN_10005070	scaffold39601	-	3734~5752	3102~5791
Dendrobium_GLEAN_10005084	Scaffold39773	+	2219~5113	2082~5113
Dendrobium_GLEAN_10005087	scaffold39762	-	1643~4754	1405~4754
Dendrobium_GLEAN_10005089	Scaffold39751	+	185~5429	83~5474
Dendrobium_GLEAN_10005100	Scaffold39678	-	3615~4616	2825~5080
Dendrobium_GLEAN_10005111	Scaffold39602	-	59~3482	1~5445
Dendrobium_GLEAN_10005136	scaffold40324	-	1866~2762	274~3388
Dendrobium_GLEAN_10005148	scaffold40318	+	3174~5176	2~5176
Dendrobium_GLEAN_10005158	scaffold38047	-	431~5523	38~5909
Dendrobium_GLEAN_10005171	Scaffold39334	-	199~5297	36~5297
Dendrobium_GLEAN_10005198	Scaffold39187	-	1313~2296	1313~5599
Dendrobium_GLEAN_10005218	scaffold39099	-	9~757	2~1187
Dendrobium_GLEAN_10005284	scaffold38503	+	5468~5912	5340~5912
Dendrobium_GLEAN_10005322	scaffold38128	-	3099~5438	2864~5966
Dendrobium_GLEAN_10005338	Scaffold37988	-	2772~5921	2772~6074
Dendrobium_GLEAN_10005351	scaffold37805	+	4697~6007	4659~6102
Dendrobium_GLEAN_10005355	scaffold37766	-	4446~5590	4211~6075
Dendrobium_GLEAN_10005369	scaffold37718	+	811~1380	364~2246
Dendrobium_GLEAN_10005383	scaffold39022	+	3445~5820	3234~6112
Dendrobium_GLEAN_10005387	scaffold37504	+	5559~6025	5433~6025
Dendrobium_GLEAN_10005411	scaffold39727	-	1606~2949	56~5773
Dendrobium_GLEAN_10005424	Scaffold37267	-	3112~5243	1684~5370
Dendrobium_GLEAN_10005457	Scaffold37122	+	3434~5425	1063~5811
Dendrobium_GLEAN_10005469	Scaffold37080	-	1515~1835	2~6229
Dendrobium_GLEAN_10005474	scaffold37034	+	686~2306	601~2306
Dendrobium_GLEAN_10005496	scaffold37043	-	4132~5466	3897~5612
Dendrobium_GLEAN_10005512	scaffold39593	+	1275~3541	1269~3731
Dendrobium_GLEAN_10005570	scaffold36535	-	3332~3817	3115~4023
Dendrobium_GLEAN_10005587	scaffold39358	+	743~2524	684~2735
Dendrobium_GLEAN_10005606	scaffold36585	+	2462~4751	1934~4751
Dendrobium_GLEAN_10005614	scaffold38290	+	68~3777	68~4569
Dendrobium_GLEAN_10005615	scaffold37006	-	2198~5678	2198~5884
Dendrobium_GLEAN_10005633	scaffold36469	+	3303~4745	94~5360
Dendrobium_GLEAN_10005657	scaffold36526	+	1982~3941	1982~4266
Dendrobium_GLEAN_10005670	scaffold36326	+	4999~5832	4841~6462
Dendrobium_GLEAN_10005679	Scaffold36312	+	1197~6021	1197~6381
Dendrobium_GLEAN_10005684	scaffold36309	-	2269~2712	1439~2737
Dendrobium_GLEAN_10005685	scaffold36306	-	476~1045	1~1154
Dendrobium_GLEAN_10005708	scaffold36224	-	4808~5728	4746~5728
Dendrobium_GLEAN_10005722	scaffold36171	+	176~2170	3~2473
Dendrobium_GLEAN_10005740	scaffold36135	-	5970~6507	5836~6531
Dendrobium_GLEAN_10005742	scaffold36126	-	208~4775	1~4775
Dendrobium_GLEAN_10005747	scaffold36089	-	1377~2807	27~2807
Dendrobium_GLEAN_10005749	scaffold37497	-	2221~5826	1371~5869
Dendrobium_GLEAN_10005754	scaffold36060	+	596~3503	596~4992
Dendrobium_GLEAN_10005759	Scaffold36037	-	1694~5525	1694~6570
Dendrobium_GLEAN_10005766	Scaffold36018	-	3551~6146	3040~6255
Dendrobium_GLEAN_10005796	scaffold35897	+	3494~5784	966~6283
Dendrobium_GLEAN_10005804	Scaffold35915	-	861~6589	665~6599
Dendrobium_GLEAN_10005808	scaffold36412	+	2527~6191	2491~6607
Dendrobium_GLEAN_10005825	scaffold35861	-	284~4297	98~5102
Dendrobium_GLEAN_10005826	scaffold35854	-	3916~5294	3891~5294
Dendrobium_GLEAN_10005836	scaffold35911	+	4331~6569	260~6569
Dendrobium_GLEAN_10005841	scaffold35714	-	2761~5810	2515~6662
Dendrobium_GLEAN_10005878	scaffold35523	-	1417~6220	542~6220
Dendrobium_GLEAN_10005902	scaffold36071	+	3076~3465	2695~6743
Dendrobium_GLEAN_10005913	Scaffold35540	+	3831~5275	163~6048
Dendrobium_GLEAN_10005921	Scaffold35524	+	3955~5142	3578~5348
Dendrobium_GLEAN_10005932	Scaffold35460	-	1189~4989	674~4989
Dendrobium_GLEAN_10005946	scaffold35342	-	2214~2755	1979~3453
Dendrobium_GLEAN_10005966	scaffold35200	-	1640~4636	1640~5714
Dendrobium_GLEAN_10005970	scaffold36042	+	235~5137	96~5137
Dendrobium_GLEAN_10006018	scaffold35196	+	3562~5639	3392~5639
Dendrobium_GLEAN_10006020	scaffold35140	+	138~5666	138~5823
Dendrobium_GLEAN_10006052	scaffold35100	-	17~1710	12~1785
Dendrobium_GLEAN_10006053	scaffold35105	-	6291~6599	469~6827
Dendrobium_GLEAN_10006090	scaffold34421	-	5075~5605	4783~5690
Dendrobium_GLEAN_10006106	Scaffold34872	+	607~1199	107~2661
Dendrobium_GLEAN_10006120	scaffold35002	-	3947~5954	3786~5979
Dendrobium_GLEAN_10006127	scaffold34801	-	844~1206	11~2146
Dendrobium_GLEAN_10006145	Scaffold34739	-	1386~1915	2~1915
Dendrobium_GLEAN_10006146	Scaffold34739	-	3669~4198	2~4430
Dendrobium_GLEAN_10006147	scaffold33895	+	1859~4084	873~4084
Dendrobium_GLEAN_10006150	scaffold34669	-	1705~7048	1705~7086
Dendrobium_GLEAN_10006183	scaffold34463	+	219~3157	219~3622
Dendrobium_GLEAN_10006196	scaffold34568	+	3864~5506	2306~5973
Dendrobium_GLEAN_10006198	scaffold35660	-	2868~7176	534~7267
Dendrobium_GLEAN_10006200	Scaffold34562	+	2652~3694	1649~3695
Dendrobium_GLEAN_10006214	Scaffold34491	-	447~5609	20~5609
Dendrobium_GLEAN_10006217	scaffold34484	-	3903~4523	3903~4534
Dendrobium_GLEAN_10006220	scaffold34477	-	5533~6971	5257~7279
Dendrobium_GLEAN_10006246	Scaffold34387	+	2583~6789	2373~7113
Dendrobium_GLEAN_10006273	scaffold34350	+	2621~2977	2621~4129
Dendrobium_GLEAN_10006280	Scaffold34312	+	213~2778	213~2812
Dendrobium_GLEAN_10006281	scaffold34301	+	4206~4959	1166~5258
Dendrobium_GLEAN_10006307	scaffold34227	+	1747~3839	1735~4838
Dendrobium_GLEAN_10006313	scaffold34458	-	4512~6449	4512~6468
Dendrobium_GLEAN_10006336	Scaffold34167	-	4566~6422	4440~6457
Dendrobium_GLEAN_10006340	Scaffold34163	+	4131~5978	4131~6526
Dendrobium_GLEAN_10006374	scaffold34155	-	1077~4105	859~5475
Dendrobium_GLEAN_10006375	scaffold34155	+	6489~7509	6181~7509
Dendrobium_GLEAN_10006387	scaffold33981	-	4858~7407	4297~7562
Dendrobium_GLEAN_10006396	Scaffold34042	-	824~2668	728~2775
Dendrobium_GLEAN_10006400	scaffold34029	+	2362~3688	2064~3849
Dendrobium_GLEAN_10006433	Scaffold33984	+	223~598	75~1284
Dendrobium_GLEAN_10006434	scaffold33730	+	1384~2054	214~2263
Dendrobium_GLEAN_10006459	scaffold34066	+	1044~4679	1044~4999
Dendrobium_GLEAN_10006478	scaffold33952	+	472~2769	472~4783
Dendrobium_GLEAN_10006492	Scaffold33826	-	5332~6926	4991~7132
Dendrobium_GLEAN_10006500	scaffold33804	-	1355~3505	1~3847
Dendrobium_GLEAN_10006509	Scaffold33787	+	5346~6028	5067~6028
Dendrobium_GLEAN_10006517	scaffold33812	+	4612~5094	41~7724
Dendrobium_GLEAN_10006550	Scaffold33681	+	737~4303	648~4459
Dendrobium_GLEAN_10006551	Scaffold33681	-	6100~7483	5729~7800
Dendrobium_GLEAN_10006556	Scaffold33669	+	1045~2931	1006~2931
Dendrobium_GLEAN_10006562	scaffold33690	-	424~5330	327~5330
Dendrobium_GLEAN_10006566	scaffold34172	+	7103~7391	2755~7573
Dendrobium_GLEAN_10006589	scaffold34409	+	1805~2275	1212~3223
Dendrobium_GLEAN_10006592	scaffold34240	-	2995~5634	2772~5686
Dendrobium_GLEAN_10006593	Scaffold33538	-	4831~6628	3969~6875
Dendrobium_GLEAN_10006604	scaffold34058	-	3043~5835	28~5835
Dendrobium_GLEAN_10006624	Scaffold33481	+	1069~5410	391~5673
Dendrobium_GLEAN_10006666	Scaffold33383	+	2524~7511	2524~7987
Dendrobium_GLEAN_10006680	Scaffold33367	+	3703~4287	3626~6005
Dendrobium_GLEAN_10006697	scaffold33317	-	277~3533	277~4131
Dendrobium_GLEAN_10006698	scaffold33317	-	7187~7995	6879~7995
Dendrobium_GLEAN_10006702	Scaffold33304	-	583~4076	362~5448
Dendrobium_GLEAN_10006738	scaffold33442	+	40~559	7~7117
Dendrobium_GLEAN_10006766	scaffold32979	-	2319~3044	2319~3096
Dendrobium_GLEAN_10006779	scaffold32279	-	4772~6566	4772~6727
Dendrobium_GLEAN_10006791	scaffold33203	-	517~996	389~1344
Dendrobium_GLEAN_10006803	scaffold33092	-	4115~7491	2~8163
Dendrobium_GLEAN_10006805	scaffold33769	-	5653~5982	4586~6227
Dendrobium_GLEAN_10006813	scaffold33110	-	5160~7012	5160~7572
Dendrobium_GLEAN_10006832	Scaffold33025	+	2042~7941	2042~8239
Dendrobium_GLEAN_10006838	scaffold33295	-	6813~7504	2396~8016
Dendrobium_GLEAN_10006844	scaffold32992	-	4052~5705	3949~5753
Dendrobium_GLEAN_10006864	Scaffold32962	-	1055~1530	815~1802
Dendrobium_GLEAN_10006874	Scaffold32953	+	1100~7954	1004~8127
Dendrobium_GLEAN_10006882	scaffold32942	-	385~3995	385~4690
Dendrobium_GLEAN_10006909	Scaffold32855	-	202~5731	1~6408
Dendrobium_GLEAN_10006931	scaffold32798	-	4810~5217	3821~5675
Dendrobium_GLEAN_10006933	Scaffold32830	+	1462~8118	1462~8293
Dendrobium_GLEAN_10006938	scaffold33355	+	1760~4475	3~4665
Dendrobium_GLEAN_10006955	scaffold33511	+	1160~2973	888~3439
Dendrobium_GLEAN_10006959	Scaffold32776	+	758~2548	758~3853
Dendrobium_GLEAN_10006964	scaffold32829	+	4559~6210	4040~7626
Dendrobium_GLEAN_10006978	scaffold32727	-	2695~8364	2591~8364
Dendrobium_GLEAN_10006986	Scaffold32707	-	4967~7137	4~8457
Dendrobium_GLEAN_10006994	scaffold33172	-	645~5306	368~5442
Dendrobium_GLEAN_10007009	scaffold32781	+	2750~5387	2463~5387
Dendrobium_GLEAN_10007018	scaffold32613	-	3523~6055	3328~6055
Dendrobium_GLEAN_10007050	scaffold33055	+	2928~8364	2251~8364
Dendrobium_GLEAN_10007059	Scaffold32533	-	8159~8566	4492~8583
Dendrobium_GLEAN_10007064	scaffold32528	-	6212~7761	5848~7880
Dendrobium_GLEAN_10007068	scaffold32991	-	684~4828	461~5393
Dendrobium_GLEAN_10007089	scaffold32482	+	5912~7397	5706~7397
Dendrobium_GLEAN_10007090	Scaffold32475	-	1847~2748	1798~6500
Dendrobium_GLEAN_10007093	scaffold32993	-	4005~8250	1311~8250
Dendrobium_GLEAN_10007105	scaffold32444	-	5017~6366	4708~6537
Dendrobium_GLEAN_10007116	scaffold32306	+	4600~7464	4463~7464
Dendrobium_GLEAN_10007120	Scaffold32417	+	3627~7381	3468~8672
Dendrobium_GLEAN_10007130	Scaffold32392	-	5205~7127	2916~7440
Dendrobium_GLEAN_10007132	scaffold32390	+	6476~7227	2498~7588
Dendrobium_GLEAN_10007151	scaffold32344	-	458~6645	378~6645
Dendrobium_GLEAN_10007156	scaffold32318	-	5571~8637	5498~8637
Dendrobium_GLEAN_10007181	Scaffold32297	+	7238~7636	7215~8761
Dendrobium_GLEAN_10007202	scaffold32270	-	5078~6241	4664~6467
Dendrobium_GLEAN_10007203	scaffold32268	-	2726~7945	296~8791
Dendrobium_GLEAN_10007205	Scaffold32266	-	524~8305	64~8795
Dendrobium_GLEAN_10007222	scaffold33597	-	1072~6132	980~6132
Dendrobium_GLEAN_10007226	scaffold32015	+	6002~7564	6002~7730
Dendrobium_GLEAN_10007229	scaffold32184	-	164~2781	18~5574
Dendrobium_GLEAN_10007264	Scaffold32199	+	7775~8776	2072~8776
Dendrobium_GLEAN_10007289	Scaffold32176	-	807~4151	332~5536
Dendrobium_GLEAN_10007303	scaffold32144	+	242~1903	16~2097
Dendrobium_GLEAN_10007309	scaffold32351	-	4509~5141	4365~6536
Dendrobium_GLEAN_10007317	scaffold32664	-	420~5878	420~6097
Dendrobium_GLEAN_10007329	scaffold32104	-	1399~5052	519~5052
Dendrobium_GLEAN_10007333	Scaffold32062	+	6365~7429	6264~7789
Dendrobium_GLEAN_10007339	Scaffold32046	-	756~8143	265~8143
Dendrobium_GLEAN_10007363	Scaffold31995	+	438~7901	142~8304
Dendrobium_GLEAN_10007368	scaffold31988	+	1491~7701	318~7701
Dendrobium_GLEAN_10007370	Scaffold31985	+	5299~7563	5149~9031
Dendrobium_GLEAN_10007371	Scaffold31979	+	738~1926	565~1926
Dendrobium_GLEAN_10007378	scaffold31952	+	4023~8991	3955~9019
Dendrobium_GLEAN_10007390	scaffold32468	-	6219~8236	6065~8236
Dendrobium_GLEAN_10007400	scaffold31891	+	5089~5981	5022~6169
Dendrobium_GLEAN_10007412	scaffold31879	-	510~4602	297~5309
Dendrobium_GLEAN_10007428	Scaffold31838	+	1407~7892	1111~7892
Dendrobium_GLEAN_10007432	scaffold31750	+	8739~9155	8116~9155
Dendrobium_GLEAN_10007473	scaffold32026	-	2215~3075	1984~3242
Dendrobium_GLEAN_10007492	scaffold31869	+	4813~7652	4290~7652
Dendrobium_GLEAN_10007511	Scaffold31678	+	5851~6959	5313~7594
Dendrobium_GLEAN_10007523	scaffold31796	+	337~5022	294~5232
Dendrobium_GLEAN_10007524	scaffold31640	-	2287~2835	773~6901
Dendrobium_GLEAN_10007525	scaffold31640	-	5608~6156	4777~6607
Dendrobium_GLEAN_10007531	scaffold31631	-	6131~8714	3710~8959
Dendrobium_GLEAN_10007541	Scaffold31613	+	7040~8147	6952~8147
Dendrobium_GLEAN_10007543	scaffold31612	-	1377~2294	1377~2993
Dendrobium_GLEAN_10007546	scaffold31612	-	6757~7563	6757~8262
Dendrobium_GLEAN_10007562	scaffold31581	-	1484~1956	817~2869
Dendrobium_GLEAN_10007581	scaffold31564	-	4616~4954	3463~7987
Dendrobium_GLEAN_10007583	scaffold31492	+	1629~2609	1322~3218
Dendrobium_GLEAN_10007613	scaffold31470	+	950~2836	821~2836
Dendrobium_GLEAN_10007628	scaffold31439	+	659~4877	659~5004
Dendrobium_GLEAN_10007639	scaffold31428	+	4641~9164	3333~9509
Dendrobium_GLEAN_10007641	scaffold31420	+	1580~5268	1541~5268
Dendrobium_GLEAN_10007645	scaffold32241	-	4447~5073	96~5302
Dendrobium_GLEAN_10007654	Scaffold31393	+	8003~9447	7981~9547
Dendrobium_GLEAN_10007664	scaffold31351	-	8326~8631	8147~9364
Dendrobium_GLEAN_10007695	scaffold31456	-	1291~5544	525~5621
Dendrobium_GLEAN_10007699	scaffold31305	+	4602~6467	4602~8417
Dendrobium_GLEAN_10007715	scaffold31166	+	2996~4694	2960~4952
Dendrobium_GLEAN_10007727	scaffold31253	-	3311~5557	3311~6147
Dendrobium_GLEAN_10007742	scaffold31235	+	1784~7946	1435~8924
Dendrobium_GLEAN_10007813	Scaffold31144	+	2689~3552	1922~3552
Dendrobium_GLEAN_10007817	scaffold31140	-	1435~3399	1093~3614
Dendrobium_GLEAN_10007819	scaffold31127	+	1769~7613	3~7935
Dendrobium_GLEAN_10007825	scaffold31115	-	717~2986	354~3285
Dendrobium_GLEAN_10007826	scaffold30662	+	568~5318	25~6124
Dendrobium_GLEAN_10007836	scaffold31076	+	7180~7940	5034~8704
Dendrobium_GLEAN_10007853	scaffold31954	-	7643~9619	6354~9820
Dendrobium_GLEAN_10007855	Scaffold31037	+	7306~8358	6596~8737
Dendrobium_GLEAN_10007876	scaffold31177	-	3623~4350	3405~4350
Dendrobium_GLEAN_10007883	scaffold30969	+	1942~3354	1942~8635
Dendrobium_GLEAN_10007888	scaffold31722	+	473~8661	165~9104
Dendrobium_GLEAN_10007894	scaffold31146	-	3175~9548	3175~9601
Dendrobium_GLEAN_10007934	scaffold30874	-	7039~9513	6598~9609
Dendrobium_GLEAN_10007985	Scaffold30702	+	3223~3657	233~9021
Dendrobium_GLEAN_10007986	Scaffold30702	+	4825~5259	4825~9021
Dendrobium_GLEAN_10007999	scaffold30571	+	9263~9959	9112~9959
Dendrobium_GLEAN_10008000	scaffold29667	-	707~2875	242~3556
Dendrobium_GLEAN_10008007	scaffold30485	-	8119~8514	8044~9164
Dendrobium_GLEAN_10008040	Scaffold30136	-	2148~6569	1984~7883
Dendrobium_GLEAN_10008073	scaffold29759	+	1403~8455	664~8455
Dendrobium_GLEAN_10008117	Scaffold29399	-	191~1634	47~10012
Dendrobium_GLEAN_10008135	scaffold29301	+	326~778	215~9735
Dendrobium_GLEAN_10008136	scaffold29301	+	9267~9719	9157~9963
Dendrobium_GLEAN_10008137	scaffold29273	-	384~861	384~1063
Dendrobium_GLEAN_10008138	scaffold29408	-	1070~8096	256~8096
Dendrobium_GLEAN_10008166	Scaffold28975	+	3595~9796	3475~10051
Dendrobium_GLEAN_10008171	scaffold28930	+	2832~3470	2212~4438
Dendrobium_GLEAN_10008183	scaffold28795	+	8569~9040	8521~9328
Dendrobium_GLEAN_10008188	scaffold28769	-	176~9701	2~9938
Dendrobium_GLEAN_10008192	Scaffold28732	-	420~7988	420~8173
Dendrobium_GLEAN_10008216	scaffold28528	-	87~4376	87~4771
Dendrobium_GLEAN_10008217	scaffold28528	-	7218~7991	4902~8272
Dendrobium_GLEAN_10008243	scaffold29277	-	5896~6246	391~6704
Dendrobium_GLEAN_10008247	scaffold28244	-	3105~4127	2884~7194
Dendrobium_GLEAN_10008258	scaffold28131	+	245~1609	163~1609
Dendrobium_GLEAN_10008259	scaffold28121	+	1070~1688	1041~1688
Dendrobium_GLEAN_10008267	scaffold28094	+	661~9715	554~10090
Dendrobium_GLEAN_10008275	Scaffold28043	+	220~3466	220~3922
Dendrobium_GLEAN_10008290	Scaffold27949	+	6226~8948	5662~8948
Dendrobium_GLEAN_10008307	scaffold27827	-	1018~1770	656~1867
Dendrobium_GLEAN_10008325	Scaffold27756	+	381~3584	381~10126
Dendrobium_GLEAN_10008346	scaffold27569	-	7786~9272	7786~9278
Dendrobium_GLEAN_10008347	scaffold27573	-	7613~10068	3247~10149
Dendrobium_GLEAN_10008355	scaffold25703	+	4087~5765	3906~6087
Dendrobium_GLEAN_10008356	scaffold25703	-	7348~9357	6328~9357
Dendrobium_GLEAN_10008358	scaffold27493	+	9160~9915	8365~9915
Dendrobium_GLEAN_10008389	scaffold27023	+	6968~7348	4320~7673
Dendrobium_GLEAN_10008391	scaffold27288	-	1773~2679	1384~3707
Dendrobium_GLEAN_10008412	Scaffold27114	-	3442~6066	3236~6073
Dendrobium_GLEAN_10008421	scaffold27090	+	352~702	7~10200
Dendrobium_GLEAN_10008445	scaffold25406	+	8808~9866	8667~9866
Dendrobium_GLEAN_10008477	scaffold26711	-	772~8899	13~9560
Dendrobium_GLEAN_10008479	scaffold26874	+	8311~8890	7806~9350
Dendrobium_GLEAN_10008484	scaffold26849	+	5566~7399	5566~8061
Dendrobium_GLEAN_10008488	scaffold26831	-	2826~3137	2117~3545
Dendrobium_GLEAN_10008490	scaffold26826	+	9167~9607	9144~9902
Dendrobium_GLEAN_10008504	scaffold26761	+	5260~7738	5260~7951
Dendrobium_GLEAN_10008519	Scaffold26728	+	4328~7945	1~8381
Dendrobium_GLEAN_10008541	scaffold26572	+	1067~2937	777~2937
Dendrobium_GLEAN_10008559	scaffold26529	-	769~1074	216~1074
Dendrobium_GLEAN_10008586	scaffold28207	+	6216~6767	6216~7071
Dendrobium_GLEAN_10008590	Scaffold26426	+	2094~6283	2094~6577
Dendrobium_GLEAN_10008591	Scaffold26426	-	8007~10082	7656~10082
Dendrobium_GLEAN_10008622	scaffold30881	+	7836~9698	7281~10361
Dendrobium_GLEAN_10008627	scaffold26075	-	1507~7743	904~7876
Dendrobium_GLEAN_10008634	scaffold29097	-	162~2591	120~2591
Dendrobium_GLEAN_10008637	scaffold26308	+	821~10192	821~10294
Dendrobium_GLEAN_10008639	scaffold26347	+	1081~2282	1081~2390
Dendrobium_GLEAN_10008678	Scaffold26191	+	437~4543	3~4844
Dendrobium_GLEAN_10008681	scaffold26168	+	6554~8158	6451~8374
Dendrobium_GLEAN_10008704	scaffold26149	+	2009~9543	1256~9543
Dendrobium_GLEAN_10008706	scaffold26219	+	5630~9598	5624~9848
Dendrobium_GLEAN_10008708	scaffold25973	-	8203~8542	7935~8892
Dendrobium_GLEAN_10008711	scaffold26117	-	355~1120	196~1482
Dendrobium_GLEAN_10008731	scaffold26039	+	1957~3396	1028~6964
Dendrobium_GLEAN_10008739	scaffold25969	+	8767~9350	8764~9438
Dendrobium_GLEAN_10008763	scaffold25992	+	7317~9095	7120~10261
Dendrobium_GLEAN_10008790	scaffold25179	+	658~4982	601~4982
Dendrobium_GLEAN_10008793	scaffold25548	-	4718~6036	3263~8759
Dendrobium_GLEAN_10008802	scaffold25842	+	7385~9583	7340~10073
Dendrobium_GLEAN_10008814	scaffold31319	-	2819~6820	2819~9387
Dendrobium_GLEAN_10008827	scaffold25774	-	1891~6081	1553~9546
Dendrobium_GLEAN_10008833	scaffold25750	-	9395~10106	9395~10155
Dendrobium_GLEAN_10008854	scaffold26906	-	9007~10580	6752~10602
Dendrobium_GLEAN_10008910	scaffold25484	+	8887~10044	8887~10230
Dendrobium_GLEAN_10008925	scaffold25513	-	2271~3446	1646~5376
Dendrobium_GLEAN_10008926	scaffold28339	+	733~1699	28~2165
Dendrobium_GLEAN_10008934	scaffold25376	+	2842~10303	1554~10399
Dendrobium_GLEAN_10008948	scaffold24355	-	3500~10244	3234~10244
Dendrobium_GLEAN_10008970	scaffold25263	+	8283~9362	7394~9951
Dendrobium_GLEAN_10008979	scaffold25230	-	2475~2843	1628~2899
Dendrobium_GLEAN_10008986	scaffold25222	-	2711~3652	2711~4897
Dendrobium_GLEAN_10008992	scaffold25120	+	5436~9458	4835~9458
Dendrobium_GLEAN_10008996	scaffold25203	-	922~5814	174~5967
Dendrobium_GLEAN_10009001	scaffold25184	+	8887~9440	8877~9489
Dendrobium_GLEAN_10009041	scaffold25063	+	4207~9831	4103~9831
Dendrobium_GLEAN_10009054	scaffold25026	-	1091~9333	1091~10658
Dendrobium_GLEAN_10009058	scaffold25020	+	7691~9226	7437~9226
Dendrobium_GLEAN_10009084	scaffold24287	-	5681~10181	5348~10181
Dendrobium_GLEAN_10009145	scaffold23625	-	5012~5963	4902~6174
Dendrobium_GLEAN_10009151	scaffold24810	-	620~1979	77~2145
Dendrobium_GLEAN_10009173	scaffold24733	-	524~3328	524~3478
Dendrobium_GLEAN_10009183	scaffold24695	+	7973~8457	7963~8457
Dendrobium_GLEAN_10009228	scaffold25669	+	4490~6626	4287~7361
Dendrobium_GLEAN_10009229	scaffold25669	-	8346~9054	8116~11041
Dendrobium_GLEAN_10009238	Scaffold24576	-	9782~10222	9207~10925
Dendrobium_GLEAN_10009239	Scaffold24571	+	6839~10912	6591~11047
Dendrobium_GLEAN_10009293	scaffold24418	+	990~2659	495~3996
Dendrobium_GLEAN_10009322	Scaffold24398	-	3336~5213	1945~5340
Dendrobium_GLEAN_10009330	scaffold24374	+	1935~5527	1883~7801
Dendrobium_GLEAN_10009377	scaffold24292	+	463~6410	194~6410
Dendrobium_GLEAN_10009381	scaffold24282	-	1667~11186	1388~11186
Dendrobium_GLEAN_10009385	scaffold24271	+	2982~10347	2952~10347
Dendrobium_GLEAN_10009386	scaffold24265	+	619~8629	420~8629
Dendrobium_GLEAN_10009393	scaffold24952	-	4444~5570	4170~5570
Dendrobium_GLEAN_10009395	scaffold24952	-	9145~11191	4170~11287
Dendrobium_GLEAN_10009403	Scaffold24224	+	2058~3184	7~3707
Dendrobium_GLEAN_10009410	scaffold24203	+	9675~10801	9655~10801
Dendrobium_GLEAN_10009413	Scaffold24198	-	2017~6781	1904~6789
Dendrobium_GLEAN_10009420	scaffold24193	+	457~4599	241~4803
Dendrobium_GLEAN_10009432	scaffold24526	+	7025~10847	6844~10921
Dendrobium_GLEAN_10009450	Scaffold24127	+	4967~8283	3849~8595
Dendrobium_GLEAN_10009460	scaffold24162	+	9213~10897	9017~10897
Dendrobium_GLEAN_10009474	scaffold23667	-	1469~8543	31~8543
Dendrobium_GLEAN_10009476	scaffold23579	-	2305~9060	2305~9220
Dendrobium_GLEAN_10009482	scaffold24108	+	4649~8095	4635~9205
Dendrobium_GLEAN_10009495	scaffold24093	+	7338~8356	7248~8677
Dendrobium_GLEAN_10009516	scaffold23999	-	5397~10845	4111~10845
Dendrobium_GLEAN_10009518	Scaffold23997	-	555~2834	270~3302
Dendrobium_GLEAN_10009519	scaffold23991	-	8243~10992	8053~10992
Dendrobium_GLEAN_10009533	scaffold24026	-	2207~6531	1702~6855
Dendrobium_GLEAN_10009537	scaffold24205	-	8685~10866	8352~11468
Dendrobium_GLEAN_10009543	scaffold23943	+	7688~8949	7503~11445
Dendrobium_GLEAN_10009546	scaffold23931	-	615~6257	376~10771
Dendrobium_GLEAN_10009553	scaffold23922	-	8813~10287	5062~10313
Dendrobium_GLEAN_10009563	scaffold23321	+	10352~11370	9921~11460
Dendrobium_GLEAN_10009610	scaffold23790	-	10243~11349	9631~11578
Dendrobium_GLEAN_10009628	scaffold23775	+	1111~4388	1111~4819
Dendrobium_GLEAN_10009630	scaffold23756	+	2929~4578	2797~6680
Dendrobium_GLEAN_10009665	scaffold23831	-	3686~7873	3686~8142
Dendrobium_GLEAN_10009667	scaffold23713	-	1036~2139	691~3499
Dendrobium_GLEAN_10009685	scaffold23596	-	4666~6001	4518~7292
Dendrobium_GLEAN_10009691	Scaffold23677	-	9285~11111	5816~11114
Dendrobium_GLEAN_10009703	scaffold23662	-	2324~5895	233~6088
Dendrobium_GLEAN_10009705	scaffold23002	+	5387~8099	5362~8661
Dendrobium_GLEAN_10009722	scaffold23600	+	4240~4683	1762~9245
Dendrobium_GLEAN_10009723	scaffold23600	+	8269~8712	6229~9174
Dendrobium_GLEAN_10009745	scaffold23549	+	6270~8145	6103~11560
Dendrobium_GLEAN_10009746	scaffold23549	+	8501~11552	8501~11560
Dendrobium_GLEAN_10009752	scaffold23334	-	5937~7628	5541~8766
Dendrobium_GLEAN_10009800	scaffold23567	-	3670~6139	3670~6378
Dendrobium_GLEAN_10009817	scaffold23595	+	3005~6756	2449~6756
Dendrobium_GLEAN_10009824	scaffold24187	-	4012~7786	4012~8270
Dendrobium_GLEAN_10009865	Scaffold23348	+	8160~8654	8134~10765
Dendrobium_GLEAN_10009882	scaffold23407	-	234~2996	234~3090
Dendrobium_GLEAN_10009886	scaffold23320	+	8887~10825	8792~10825
Dendrobium_GLEAN_10009901	scaffold23970	-	719~9006	719~9326
Dendrobium_GLEAN_10009910	scaffold23257	-	2579~11019	2131~11019
Dendrobium_GLEAN_10009915	scaffold23250	-	7930~9000	7784~11954
Dendrobium_GLEAN_10009916	scaffold22655	+	1607~5099	1454~5099
Dendrobium_GLEAN_10009930	scaffold23234	+	830~1990	232~3860
Dendrobium_GLEAN_10009937	scaffold23499	+	8248~11024	8031~11075
Dendrobium_GLEAN_10009942	scaffold23215	+	4416~9866	4178~10075
Dendrobium_GLEAN_10009943	scaffold23215	-	4448~11714	4167~11714
Dendrobium_GLEAN_10009946	Scaffold23210	+	8389~11112	8297~11112
Dendrobium_GLEAN_10009947	scaffold23198	-	1288~9897	1139~9993
Dendrobium_GLEAN_10009963	Scaffold23167	-	687~9532	687~9577
Dendrobium_GLEAN_10009978	scaffold23957	+	9748~11749	9748~11827
Dendrobium_GLEAN_10009987	scaffold24332	-	2461~4444	2461~4550
Dendrobium_GLEAN_10010000	scaffold23119	+	10858~11640	10858~12038
Dendrobium_GLEAN_10010002	Scaffold23108	-	1050~2641	779~2745
Dendrobium_GLEAN_10010006	scaffold23032	+	1546~3123	1522~3789
Dendrobium_GLEAN_10010014	scaffold23207	+	10761~11357	10725~11357
Dendrobium_GLEAN_10010015	scaffold23079	+	4945~6781	4759~6986
Dendrobium_GLEAN_10010042	Scaffold23076	+	10762~12017	10498~12017
Dendrobium_GLEAN_10010054	scaffold23062	+	3856~4482	1450~6353
Dendrobium_GLEAN_10010074	scaffold23623	+	362~1684	16~1995
Dendrobium_GLEAN_10010076	scaffold23028	-	1975~8194	1755~8194
Dendrobium_GLEAN_10010085	scaffold23021	+	7774~8819	7578~8819
Dendrobium_GLEAN_10010088	scaffold23017	+	4939~8850	4902~8850
Dendrobium_GLEAN_10010110	scaffold22436	+	10864~11882	6906~11882
Dendrobium_GLEAN_10010121	scaffold22522	+	5911~6758	5396~7520
Dendrobium_GLEAN_10010122	scaffold22522	-	10967~11314	10230~12169
Dendrobium_GLEAN_10010146	Scaffold22897	+	45~2038	45~10539
Dendrobium_GLEAN_10010152	scaffold22439	+	4778~6807	4778~7201
Dendrobium_GLEAN_10010154	scaffold22439	+	10319~11281	10132~11446
Dendrobium_GLEAN_10010156	scaffold22811	-	3283~8312	3283~8436
Dendrobium_GLEAN_10010162	scaffold23249	-	287~8526	81~8538
Dendrobium_GLEAN_10010203	scaffold22844	+	987~7958	938~7958
Dendrobium_GLEAN_10010228	scaffold23658	+	6498~7012	3501~7597
Dendrobium_GLEAN_10010259	scaffold23768	+	9266~10900	9098~11143
Dendrobium_GLEAN_10010263	scaffold22798	+	6737~9294	6615~12325
Dendrobium_GLEAN_10010273	Scaffold22683	-	2896~3389	2690~5937
Dendrobium_GLEAN_10010290	scaffold22650	+	4927~5709	4666~5937
Dendrobium_GLEAN_10010300	scaffold22271	-	949~1728	319~1728
Dendrobium_GLEAN_10010301	scaffold22271	+	7805~12186	7519~12255
Dendrobium_GLEAN_10010315	scaffold23099	-	1244~11619	1167~12100
Dendrobium_GLEAN_10010319	scaffold22596	-	10208~10690	10024~10690
Dendrobium_GLEAN_10010327	scaffold22576	-	345~3585	345~12402
Dendrobium_GLEAN_10010333	scaffold22623	-	28~7975	14~8270
Dendrobium_GLEAN_10010343	scaffold22587	-	10417~11543	9885~11543
Dendrobium_GLEAN_10010382	Scaffold22544	-	981~6255	981~11769
Dendrobium_GLEAN_10010401	scaffold21854	-	60~12407	1~12407
Dendrobium_GLEAN_10010430	scaffold22952	+	35~12527	8~12527
Dendrobium_GLEAN_10010443	scaffold22452	+	405~3619	149~3806
Dendrobium_GLEAN_10010445	scaffold22444	+	894~10823	894~12313
Dendrobium_GLEAN_10010464	Scaffold22429	+	7972~10032	7743~10178
Dendrobium_GLEAN_10010466	scaffold22340	+	10297~10710	9865~11123
Dendrobium_GLEAN_10010489	scaffold21830	-	121~9441	2~9441
Dendrobium_GLEAN_10010491	scaffold23060	+	10410~12022	10003~12220
Dendrobium_GLEAN_10010515	scaffold22350	+	2449~2979	1997~3475
Dendrobium_GLEAN_10010519	scaffold22337	+	9673~12425	9605~12425
Dendrobium_GLEAN_10010520	Scaffold22334	-	3548~11827	3548~12164
Dendrobium_GLEAN_10010547	scaffold22309	-	5063~11587	2693~11587
Dendrobium_GLEAN_10010551	Scaffold22284	-	1838~4588	1712~4588
Dendrobium_GLEAN_10010553	Scaffold22283	+	4684~11137	4186~12513
Dendrobium_GLEAN_10010554	scaffold22772	+	1555~2008	1451~11568
Dendrobium_GLEAN_10010556	scaffold22772	+	10527~11324	10527~11568
Dendrobium_GLEAN_10010568	scaffold22123	-	449~2560	449~2716
Dendrobium_GLEAN_10010606	scaffold22477	-	1612~10252	793~11030
Dendrobium_GLEAN_10010608	scaffold22473	+	2364~4457	1782~12239
Dendrobium_GLEAN_10010609	scaffold22473	-	9067~9951	8594~10013
Dendrobium_GLEAN_10010610	scaffold22473	-	10278~10547	8594~10967
Dendrobium_GLEAN_10010619	scaffold22170	+	10123~12759	9543~12759
Dendrobium_GLEAN_10010634	scaffold22163	-	5718~6609	4512~6613
Dendrobium_GLEAN_10010642	scaffold22067	+	2594~9772	2509~9948
Dendrobium_GLEAN_10010643	Scaffold22131	+	1883~4509	1776~4509
Dendrobium_GLEAN_10010654	scaffold22342	-	5926~11092	1~11396
Dendrobium_GLEAN_10010656	scaffold22145	-	2804~7198	2804~7666
Dendrobium_GLEAN_10010663	scaffold22355	-	1850~7851	1297~7851
Dendrobium_GLEAN_10010666	scaffold22095	+	8488~8796	7721~9300
Dendrobium_GLEAN_10010677	scaffold22113	-	54~1082	18~3048
Dendrobium_GLEAN_10010678	scaffold22113	-	2195~2818	1974~3576
Dendrobium_GLEAN_10010679	scaffold22113	-	6939~12550	6686~12730
Dendrobium_GLEAN_10010697	scaffold22050	-	463~795	19~1054
Dendrobium_GLEAN_10010707	scaffold22007	-	5905~6527	5556~6527
Dendrobium_GLEAN_10010708	scaffold22033	-	10165~12619	9861~12619
Dendrobium_GLEAN_10010709	scaffold22906	-	2814~3917	105~4424
Dendrobium_GLEAN_10010710	scaffold22906	+	4171~7555	3790~7555
Dendrobium_GLEAN_10010725	Scaffold22011	+	191~5252	144~10250
Dendrobium_GLEAN_10010726	Scaffold22011	+	7271~9959	7271~10250
Dendrobium_GLEAN_10010736	scaffold21995	-	9488~10795	9006~10805
Dendrobium_GLEAN_10010756	scaffold22158	-	1057~5066	82~5247
Dendrobium_GLEAN_10010758	scaffold21960	+	9334~10575	8954~12989
Dendrobium_GLEAN_10010775	scaffold22151	+	2586~11210	2477~11342
Dendrobium_GLEAN_10010782	Scaffold21929	-	1923~2321	47~2347
Dendrobium_GLEAN_10010784	Scaffold21926	+	8896~11111	8879~11293
Dendrobium_GLEAN_10010788	scaffold21975	-	7100~8854	4956~9588
Dendrobium_GLEAN_10010801	scaffold22003	+	12025~12927	8857~12927
Dendrobium_GLEAN_10010805	scaffold21900	-	5442~10486	143~10737
Dendrobium_GLEAN_10010822	scaffold21872	-	1065~12235	1028~12235
Dendrobium_GLEAN_10010830	scaffold21861	+	6412~10861	5645~13088
Dendrobium_GLEAN_10010832	scaffold21857	+	3104~11983	25~11983
Dendrobium_GLEAN_10010835	scaffold21903	-	8866~10022	7522~10024
Dendrobium_GLEAN_10010836	scaffold21855	+	5588~8957	261~9205
Dendrobium_GLEAN_10010852	Scaffold21843	+	2350~8038	207~8038
Dendrobium_GLEAN_10010855	Scaffold21839	+	413~5714	315~5959
Dendrobium_GLEAN_10010874	Scaffold21817	-	610~10429	1~10505
Dendrobium_GLEAN_10010903	scaffold21801	-	779~7217	514~7411
Dendrobium_GLEAN_10010920	scaffold21778	+	5308~9648	5127~9648
Dendrobium_GLEAN_10010960	Scaffold21723	+	4170~7137	4170~8386
Dendrobium_GLEAN_10010981	scaffold21742	-	5455~6235	5455~10681
Dendrobium_GLEAN_10010985	scaffold21757	+	7354~8596	6875~8866
Dendrobium_GLEAN_10010988	scaffold21685	+	827~1159	768~3966
Dendrobium_GLEAN_10011008	scaffold21638	+	3352~4260	2480~4260
Dendrobium_GLEAN_10011037	scaffold21614	-	1003~12579	9~12579
Dendrobium_GLEAN_10011046	scaffold21904	+	669~3080	445~3766
Dendrobium_GLEAN_10011049	scaffold21597	+	5191~6371	4840~6371
Dendrobium_GLEAN_10011051	scaffold21597	+	9257~12878	4831~13101
Dendrobium_GLEAN_10011052	scaffold21596	-	1883~6699	1883~8052
Dendrobium_GLEAN_10011074	scaffold21238	+	2084~3250	1864~4202
Dendrobium_GLEAN_10011077	scaffold21612	-	5267~5794	4382~5953
Dendrobium_GLEAN_10011079	scaffold21612	+	11420~12875	11271~12875
Dendrobium_GLEAN_10011087	scaffold21870	+	1008~7356	1008~9549
Dendrobium_GLEAN_10011100	scaffold21551	+	5012~10299	4836~10633
Dendrobium_GLEAN_10011155	Scaffold21492	+	1720~5299	1720~5613
Dendrobium_GLEAN_10011157	Scaffold21492	-	8313~10168	5139~10341
Dendrobium_GLEAN_10011158	scaffold21521	-	24~509	2~11730
Dendrobium_GLEAN_10011166	scaffold21613	+	3310~4569	2366~5094
Dendrobium_GLEAN_10011171	scaffold21728	-	515~13071	194~13071
Dendrobium_GLEAN_10011179	scaffold21455	-	2416~13165	1705~13165
Dendrobium_GLEAN_10011191	Scaffold21447	+	595~10286	335~12457
Dendrobium_GLEAN_10011193	scaffold21448	+	2951~12818	2571~12818
Dendrobium_GLEAN_10011194	scaffold21443	-	467~6657	467~7380
Dendrobium_GLEAN_10011196	Scaffold21438	+	7718~11872	7718~12337
Dendrobium_GLEAN_10011211	scaffold21431	-	3795~4679	3795~4993
Dendrobium_GLEAN_10011212	scaffold21431	+	4729~9898	2558~10026
Dendrobium_GLEAN_10011213	scaffold21431	-	11449~13039	11371~13374
Dendrobium_GLEAN_10011219	scaffold21420	-	1264~2622	77~2840
Dendrobium_GLEAN_10011220	scaffold21420	-	5230~6483	4477~6571
Dendrobium_GLEAN_10011221	scaffold21420	+	9357~11550	9151~11550
Dendrobium_GLEAN_10011222	scaffold21420	-	12659~13258	12494~13258
Dendrobium_GLEAN_10011236	scaffold21230	+	1725~9341	1485~9341
Dendrobium_GLEAN_10011239	scaffold21401	+	8647~13631	8597~13631
Dendrobium_GLEAN_10011249	scaffold21412	-	5514~12773	5459~12773
Dendrobium_GLEAN_10011251	scaffold21370	-	7660~9031	7660~9260
Dendrobium_GLEAN_10011253	scaffold21368	-	8053~12609	4770~12804
Dendrobium_GLEAN_10011260	scaffold21604	+	5359~5856	5249~13546
Dendrobium_GLEAN_10011281	scaffold21342	-	8180~10159	7991~11070
Dendrobium_GLEAN_10011283	scaffold21338	-	7978~12277	7383~12277
Dendrobium_GLEAN_10011285	Scaffold21336	-	3212~6336	1658~6766
Dendrobium_GLEAN_10011288	scaffold20963	-	8663~9175	2077~10449
Dendrobium_GLEAN_10011291	scaffold21329	+	6253~6960	5698~6960
Dendrobium_GLEAN_10011301	scaffold21324	-	3658~6520	3518~13576
Dendrobium_GLEAN_10011304	scaffold21652	+	730~11836	39~12595
Dendrobium_GLEAN_10011319	scaffold21534	+	4399~12536	4253~12536
Dendrobium_GLEAN_10011320	scaffold21482	-	1525~4649	1525~13641
Dendrobium_GLEAN_10011321	scaffold21297	-	11115~12939	10789~13225
Dendrobium_GLEAN_10011369	scaffold21247	+	7623~10516	3429~10516
Dendrobium_GLEAN_10011381	scaffold21028	+	796~4897	796~4987
Dendrobium_GLEAN_10011383	scaffold21028	+	13064~13501	12383~13760
Dendrobium_GLEAN_10011384	scaffold21220	-	5828~6199	3340~6239
Dendrobium_GLEAN_10011386	scaffold21215	+	10213~13720	9777~13735
Dendrobium_GLEAN_10011388	scaffold21212	-	5868~12559	5668~12632
Dendrobium_GLEAN_10011391	scaffold21232	+	10515~13380	246~13380
Dendrobium_GLEAN_10011398	scaffold21153	+	579~10736	579~10955
Dendrobium_GLEAN_10011408	scaffold21142	+	5944~6429	5745~8152
Dendrobium_GLEAN_10011425	scaffold21510	-	5896~11557	5896~12946
Dendrobium_GLEAN_10011428	scaffold21162	-	5828~13462	5134~13462
Dendrobium_GLEAN_10011439	scaffold21002	+	6528~13836	6151~13900
Dendrobium_GLEAN_10011442	scaffold21273	+	9941~11510	9812~11611
Dendrobium_GLEAN_10011473	scaffold21183	-	1578~12001	362~13610
Dendrobium_GLEAN_10011474	scaffold21057	-	7550~13818	7550~14021
Dendrobium_GLEAN_10011478	scaffold21055	-	7849~8976	7645~14027
Dendrobium_GLEAN_10011485	scaffold21032	-	5280~10980	5011~11059
Dendrobium_GLEAN_10011503	scaffold21001	+	10307~11350	10307~11673
Dendrobium_GLEAN_10011506	scaffold21258	+	10194~10622	9388~10860
Dendrobium_GLEAN_10011521	scaffold20983	-	1353~11588	1353~11743
Dendrobium_GLEAN_10011535	Scaffold20978	-	706~7150	1~8180
Dendrobium_GLEAN_10011559	scaffold20974	+	13435~13909	13271~14093
Dendrobium_GLEAN_10011570	scaffold20922	+	8438~9490	6163~9490
Dendrobium_GLEAN_10011586	scaffold20911	-	10025~11005	8988~11301
Dendrobium_GLEAN_10011591	scaffold20900	+	3119~9300	2892~9300
Dendrobium_GLEAN_10011595	scaffold20899	-	8078~8926	8078~10209
Dendrobium_GLEAN_10011599	scaffold21150	+	9265~10761	9085~10777
Dendrobium_GLEAN_10011607	scaffold20895	+	10216~11359	1231~11359
Dendrobium_GLEAN_10011609	scaffold20894	-	2840~7444	2703~7444
Dendrobium_GLEAN_10011622	scaffold20873	-	12761~14152	3802~14220
Dendrobium_GLEAN_10011625	scaffold20935	+	4016~8763	3928~8763
Dendrobium_GLEAN_10011628	scaffold20927	+	11458~12547	11138~12547
Dendrobium_GLEAN_10011641	scaffold20857	+	10621~13563	10440~14240
Dendrobium_GLEAN_10011642	scaffold20852	+	2275~2780	2126~13946
Dendrobium_GLEAN_10011649	scaffold20851	-	8890~13057	8647~13353
Dendrobium_GLEAN_10011654	scaffold20849	+	2837~3181	66~3695
Dendrobium_GLEAN_10011662	Scaffold20837	+	671~1171	626~1810
Dendrobium_GLEAN_10011663	Scaffold20837	-	8177~12502	7908~12654
Dendrobium_GLEAN_10011668	scaffold20825	-	1029~12805	1019~12805
Dendrobium_GLEAN_10011688	Scaffold20798	+	8407~13647	8201~13811
Dendrobium_GLEAN_10011716	scaffold20784	+	5129~7488	4730~7717
Dendrobium_GLEAN_10011717	scaffold21086	+	3408~9535	3149~13560
Dendrobium_GLEAN_10011734	scaffold20950	+	8628~9473	7783~9473
Dendrobium_GLEAN_10011735	scaffold20950	+	11158~14042	7595~14341
Dendrobium_GLEAN_10011758	scaffold20760	+	2921~12268	2088~12991
Dendrobium_GLEAN_10011763	scaffold20881	-	7920~12947	7735~12947
Dendrobium_GLEAN_10011770	scaffold21542	-	3002~4343	3002~4853
Dendrobium_GLEAN_10011775	scaffold20766	-	5493~13260	4598~13260
Dendrobium_GLEAN_10011776	scaffold20485	+	7951~13155	7900~13155
Dendrobium_GLEAN_10011778	scaffold20745	-	4530~8702	4530~14006
Dendrobium_GLEAN_10011789	scaffold20753	-	822~1882	66~1882
Dendrobium_GLEAN_10011800	scaffold20713	+	733~7386	72~8002
Dendrobium_GLEAN_10011806	scaffold20708	-	6901~7524	6201~8032
Dendrobium_GLEAN_10011809	scaffold20707	-	1065~7335	833~12587
Dendrobium_GLEAN_10011821	scaffold20649	-	5439~13810	268~14420
Dendrobium_GLEAN_10011831	scaffold20687	-	1764~7515	1454~7904
Dendrobium_GLEAN_10011840	scaffold20672	-	6382~11860	6382~11954
Dendrobium_GLEAN_10011846	scaffold20977	-	11846~12629	11361~12872
Dendrobium_GLEAN_10011870	scaffold20600	-	860~4758	860~8427
Dendrobium_GLEAN_10011873	scaffold20671	-	2620~4368	2290~4368
Dendrobium_GLEAN_10011875	scaffold20671	-	4668~13888	2290~13888
Dendrobium_GLEAN_10011894	scaffold20582	+	9883~10581	9724~12067
Dendrobium_GLEAN_10011909	Scaffold20557	-	3126~3806	1416~3962
Dendrobium_GLEAN_10011922	scaffold20549	-	71~432	71~1117
Dendrobium_GLEAN_10011926	Scaffold20539	-	945~11205	191~11661
Dendrobium_GLEAN_10011934	scaffold20619	+	5178~5780	5178~6419
Dendrobium_GLEAN_10011953	scaffold20519	-	4464~4902	4156~4958
Dendrobium_GLEAN_10011954	scaffold20519	-	5533~13554	5290~13660
Dendrobium_GLEAN_10011964	Scaffold20496	-	6804~13324	5858~14608
Dendrobium_GLEAN_10012006	scaffold20346	-	1731~10989	1290~10989
Dendrobium_GLEAN_10012009	scaffold20186	-	1600~2768	1~2768
Dendrobium_GLEAN_10012011	scaffold20464	+	395~12587	283~12587
Dendrobium_GLEAN_10012013	scaffold20689	-	13420~14097	11418~14744
Dendrobium_GLEAN_10012016	scaffold20456	+	11383~13617	8847~13946
Dendrobium_GLEAN_10012019	scaffold20427	+	5687~8745	1414~10623
Dendrobium_GLEAN_10012035	Scaffold20406	-	13541~14598	13315~14789
Dendrobium_GLEAN_10012053	scaffold20385	+	2873~4212	2740~4522
Dendrobium_GLEAN_10012054	scaffold20385	-	7312~11579	7270~11810
Dendrobium_GLEAN_10012072	scaffold19883	-	12252~14812	11930~14812
Dendrobium_GLEAN_10012078	scaffold20347	-	203~3517	164~3818
Dendrobium_GLEAN_10012080	scaffold20347	+	11306~13237	11021~14009
Dendrobium_GLEAN_10012085	Scaffold20338	-	2051~13342	1754~14766
Dendrobium_GLEAN_10012091	scaffold20334	-	7283~8998	6420~9184
Dendrobium_GLEAN_10012101	Scaffold20330	+	10633~14322	3~14427
Dendrobium_GLEAN_10012124	scaffold20304	-	5108~7204	199~7392
Dendrobium_GLEAN_10012128	scaffold20301	-	1837~13623	1837~13916
Dendrobium_GLEAN_10012141	scaffold20457	+	1556~8038	1556~8259
Dendrobium_GLEAN_10012142	scaffold20457	+	11291~13464	11053~13630
Dendrobium_GLEAN_10012147	scaffold20620	-	2043~2576	1827~5599
Dendrobium_GLEAN_10012154	scaffold20532	-	4689~8480	4689~14475
Dendrobium_GLEAN_10012159	scaffold20659	-	4987~10121	4791~10182
Dendrobium_GLEAN_10012161	scaffold20244	+	5905~10423	5436~10423
Dendrobium_GLEAN_10012165	scaffold20803	+	3892~5127	3892~5499
Dendrobium_GLEAN_10012169	scaffold20803	-	10282~12591	10247~12591
Dendrobium_GLEAN_10012171	scaffold20227	+	7372~8619	7372~8848
Dendrobium_GLEAN_10012193	scaffold20195	-	1094~3278	61~3720
Dendrobium_GLEAN_10012194	scaffold20195	-	10567~15006	10258~15006
Dendrobium_GLEAN_10012197	scaffold20295	-	13398~14387	11744~14582
Dendrobium_GLEAN_10012212	scaffold20173	+	4483~8464	1239~9211
Dendrobium_GLEAN_10012231	Scaffold20135	-	7062~11472	5946~11481
Dendrobium_GLEAN_10012240	scaffold20117	-	3431~13939	3431~15107
Dendrobium_GLEAN_10012242	scaffold20397	-	2935~14700	2830~14788
Dendrobium_GLEAN_10012244	Scaffold20111	+	2302~5801	2302~6015
Dendrobium_GLEAN_10012248	scaffold20091	+	4552~7235	4101~7518
Dendrobium_GLEAN_10012258	scaffold19749	-	4567~6401	3956~6525
Dendrobium_GLEAN_10012266	scaffold20423	-	7562~8245	7297~10500
Dendrobium_GLEAN_10012275	Scaffold20079	-	938~9016	938~9411
Dendrobium_GLEAN_10012279	scaffold20069	+	5244~9659	5003~9659
Dendrobium_GLEAN_10012339	scaffold19998	+	303~789	2~1060
Dendrobium_GLEAN_10012344	scaffold19932	-	11902~14962	11372~15251
Dendrobium_GLEAN_10012346	scaffold19989	-	3671~6427	276~7412
Dendrobium_GLEAN_10012347	scaffold19989	-	8643~9726	8187~11360
Dendrobium_GLEAN_10012352	scaffold19986	+	8023~8445	7913~11423
Dendrobium_GLEAN_10012399	Scaffold19945	-	3780~15115	1586~15115
Dendrobium_GLEAN_10012400	scaffold19797	-	702~7752	702~14576
Dendrobium_GLEAN_10012404	scaffold20116	-	4551~14041	4450~14296
Dendrobium_GLEAN_10012425	scaffold19934	-	12311~14728	12168~14754
Dendrobium_GLEAN_10012428	scaffold19930	+	8379~9494	8021~9765
Dendrobium_GLEAN_10012438	Scaffold19924	+	5163~9010	4983~9231
Dendrobium_GLEAN_10012439	scaffold19920	+	2522~4778	2522~5587
Dendrobium_GLEAN_10012441	scaffold19920	+	12362~14552	12214~15346
Dendrobium_GLEAN_10012443	Scaffold19917	+	3213~9868	3062~10158
Dendrobium_GLEAN_10012445	Scaffold19917	-	12223~13767	10843~15342
Dendrobium_GLEAN_10012472	Scaffold19880	-	3282~14053	2868~14129
Dendrobium_GLEAN_10012487	scaffold20096	+	12968~14759	12619~14977
Dendrobium_GLEAN_10012498	scaffold19834	-	13736~14260	13736~14686
Dendrobium_GLEAN_10012506	scaffold19847	+	4041~4910	3802~5358
Dendrobium_GLEAN_10012517	scaffold19913	+	1343~5434	1329~7826
Dendrobium_GLEAN_10012567	Scaffold19711	-	1001~1929	831~4182
Dendrobium_GLEAN_10012582	scaffold19689	-	189~1259	10~1492
Dendrobium_GLEAN_10012608	scaffold19666	-	5399~6284	2051~6284
Dendrobium_GLEAN_10012612	scaffold20275	-	6272~12005	672~12192
Dendrobium_GLEAN_10012613	scaffold19660	+	5874~13563	5482~15545
Dendrobium_GLEAN_10012619	scaffold19246	+	5725~13078	1~15639
Dendrobium_GLEAN_10012640	scaffold19968	+	4762~8020	4762~8422
Dendrobium_GLEAN_10012648	scaffold19875	-	6534~15381	6103~15381
Dendrobium_GLEAN_10012650	scaffold19610	+	4671~6143	339~6737
Dendrobium_GLEAN_10012658	scaffold19210	+	9959~13524	9959~13723
Dendrobium_GLEAN_10012678	scaffold19564	+	4713~5384	4304~5751
Dendrobium_GLEAN_10012705	scaffold19657	+	459~3355	392~3738
Dendrobium_GLEAN_10012711	scaffold19490	-	1580~15645	1255~15725
Dendrobium_GLEAN_10012712	scaffold19007	-	449~1851	115~1851
Dendrobium_GLEAN_10012724	scaffold19559	+	3449~5861	2328~6062
Dendrobium_GLEAN_10012741	scaffold19757	-	3140~12167	2860~12725
Dendrobium_GLEAN_10012742	scaffold19662	-	3627~10891	2921~10891
Dendrobium_GLEAN_10012751	scaffold19885	+	13230~14159	13103~15799
Dendrobium_GLEAN_10012758	scaffold19558	-	581~2688	271~2931
Dendrobium_GLEAN_10012759	scaffold19558	+	8027~12007	7922~12217
Dendrobium_GLEAN_10012764	scaffold19811	+	9822~15669	9822~15824
Dendrobium_GLEAN_10012766	scaffold19521	-	12515~13465	12431~13493
Dendrobium_GLEAN_10012771	scaffold19513	+	1398~13224	1319~13224
Dendrobium_GLEAN_10012793	Scaffold19486	+	4727~9886	4562~9886
Dendrobium_GLEAN_10012808	scaffold19496	-	10672~11076	10313~11076
Dendrobium_GLEAN_10012811	scaffold19626	-	3145~4764	3~4823
Dendrobium_GLEAN_10012812	scaffold19626	+	11018~12035	10389~12143
Dendrobium_GLEAN_10012820	scaffold19443	+	2066~7948	1758~14774
Dendrobium_GLEAN_10012822	scaffold19443	+	12894~14208	12894~14774
Dendrobium_GLEAN_10012839	scaffold19584	-	15363~15788	15044~15890
Dendrobium_GLEAN_10012863	scaffold19388	-	296~975	138~1117
Dendrobium_GLEAN_10012883	scaffold19532	-	8562~12999	8340~13658
Dendrobium_GLEAN_10012885	scaffold19386	+	2003~6063	166~11924
Dendrobium_GLEAN_10012888	scaffold19386	+	10133~11431	10133~11924
Dendrobium_GLEAN_10012890	scaffold19116	+	11302~11616	11134~11944
Dendrobium_GLEAN_10012916	scaffold19336	-	11992~14613	11777~15830
Dendrobium_GLEAN_10012928	scaffold19348	+	4002~11431	3973~11431
Dendrobium_GLEAN_10012929	scaffold19348	-	12034~13017	11044~13409
Dendrobium_GLEAN_10012934	scaffold19320	+	4853~15900	4754~15943
Dendrobium_GLEAN_10012940	scaffold19661	+	2982~4584	1982~4584
Dendrobium_GLEAN_10012949	scaffold19480	-	3598~6739	1~6739
Dendrobium_GLEAN_10012959	scaffold18952	-	839~14209	9~14209
Dendrobium_GLEAN_10012960	scaffold19318	+	2667~5165	2171~6575
Dendrobium_GLEAN_10012970	scaffold19267	-	12092~12478	12092~16102
Dendrobium_GLEAN_10012972	Scaffold19263	+	806~4046	612~4401
Dendrobium_GLEAN_10012976	scaffold19173	-	5654~9046	5505~9046
Dendrobium_GLEAN_10012977	scaffold19173	-	9135~15802	5505~16082
Dendrobium_GLEAN_10012985	scaffold19365	-	4759~15106	4759~15224
Dendrobium_GLEAN_10013000	Scaffold19224	-	12454~12876	1835~13075
Dendrobium_GLEAN_10013005	scaffold19216	-	3658~15047	1445~15047
Dendrobium_GLEAN_10013032	scaffold19289	-	7261~10768	1880~14946
Dendrobium_GLEAN_10013050	scaffold19164	-	13598~14185	12696~14397
Dendrobium_GLEAN_10013065	scaffold19152	-	8701~11079	8625~11079
Dendrobium_GLEAN_10013066	scaffold19152	-	14779~15716	8625~15975
Dendrobium_GLEAN_10013073	scaffold19138	-	3189~3972	3189~4045
Dendrobium_GLEAN_10013074	scaffold19138	+	10353~14903	10058~15167
Dendrobium_GLEAN_10013093	scaffold19207	+	2496~3584	1854~3777
Dendrobium_GLEAN_10013103	scaffold19119	+	11118~11447	6861~11447
Dendrobium_GLEAN_10013104	scaffold19114	+	2513~5458	1~5858
Dendrobium_GLEAN_10013107	scaffold19118	+	11279~11928	11047~12191
Dendrobium_GLEAN_10013121	scaffold19763	-	12560~15864	9224~15864
Dendrobium_GLEAN_10013123	scaffold19153	+	12836~13875	12836~14771
Dendrobium_GLEAN_10013133	scaffold19106	+	11872~14456	11426~14961
Dendrobium_GLEAN_10013144	scaffold19103	-	3600~10259	2536~10259
Dendrobium_GLEAN_10013145	scaffold19104	-	620~12356	12~12432
Dendrobium_GLEAN_10013155	scaffold19499	-	11680~12425	11680~16304
Dendrobium_GLEAN_10013171	scaffold19088	+	7308~9626	398~13725
Dendrobium_GLEAN_10013185	scaffold19082	-	9951~15720	9947~15871
Dendrobium_GLEAN_10013195	scaffold19226	+	4513~7348	4134~7532
Dendrobium_GLEAN_10013206	scaffold19048	+	6965~10191	6965~11213
Dendrobium_GLEAN_10013209	scaffold19047	+	7429~16332	5737~16332
Dendrobium_GLEAN_10013226	scaffold19423	-	13783~15754	13556~16343
Dendrobium_GLEAN_10013240	scaffold19017	-	9831~11684	9571~12143
Dendrobium_GLEAN_10013241	scaffold19037	+	781~1197	670~2166
Dendrobium_GLEAN_10013256	scaffold19010	+	8939~10074	8857~10347
Dendrobium_GLEAN_10013257	scaffold19008	+	4517~4876	1162~15265
Dendrobium_GLEAN_10013267	scaffold18991	+	12046~14439	11836~16065
Dendrobium_GLEAN_10013271	scaffold19067	+	10846~13224	10233~13224
Dendrobium_GLEAN_10013286	scaffold18919	-	3479~9591	3285~15863
Dendrobium_GLEAN_10013287	scaffold18967	+	3570~8819	3408~8819
Dendrobium_GLEAN_10013292	scaffold18961	-	5171~8609	4849~16427
Dendrobium_GLEAN_10013317	scaffold18935	+	3937~6597	3937~6787
Dendrobium_GLEAN_10013326	scaffold18921	+	2670~6027	1787~6027
Dendrobium_GLEAN_10013339	scaffold18884	-	8311~8613	8180~8613
Dendrobium_GLEAN_10013340	scaffold18884	-	10547~10855	8180~10855
Dendrobium_GLEAN_10013343	scaffold19123	-	12603~13670	8287~15844
Dendrobium_GLEAN_10013349	scaffold18907	-	8801~13905	8753~14490
Dendrobium_GLEAN_10013366	scaffold18990	+	8903~16294	8444~16566
Dendrobium_GLEAN_10013367	scaffold18901	+	1602~4190	417~4323
Dendrobium_GLEAN_10013386	scaffold18871	-	2680~2977	2680~14046
Dendrobium_GLEAN_10013389	scaffold18705	-	4964~5428	3870~5537
Dendrobium_GLEAN_10013395	Scaffold18850	-	11799~15876	11729~16038
Dendrobium_GLEAN_10013396	scaffold18620	+	12513~16011	4170~16578
Dendrobium_GLEAN_10013400	scaffold18840	+	11110~16468	11041~16468
Dendrobium_GLEAN_10013411	scaffold18783	+	10430~11439	10331~11439
Dendrobium_GLEAN_10013422	scaffold18786	-	1218~8618	897~14445
Dendrobium_GLEAN_10013429	scaffold18810	-	9134~12430	8526~12499
Dendrobium_GLEAN_10013433	Scaffold18807	+	129~10863	9~11127
Dendrobium_GLEAN_10013434	Scaffold18807	-	11900~13957	11787~14078
Dendrobium_GLEAN_10013436	Scaffold18806	-	15456~16380	2698~16647
Dendrobium_GLEAN_10013437	scaffold19073	+	497~11676	497~11764
Dendrobium_GLEAN_10013459	scaffold18814	+	3143~14107	1478~14309
Dendrobium_GLEAN_10013471	Scaffold18773	-	4702~9659	4702~9671
Dendrobium_GLEAN_10013480	scaffold18759	-	5602~7740	5302~7760
Dendrobium_GLEAN_10013491	scaffold19208	+	5825~6747	5673~6747
Dendrobium_GLEAN_10013493	scaffold19208	+	12025~15899	11706~16732
Dendrobium_GLEAN_10013495	scaffold18791	-	6813~14169	6568~16579
Dendrobium_GLEAN_10013529	scaffold18792	+	3632~4636	3185~6141
Dendrobium_GLEAN_10013544	scaffold18732	-	4116~14721	4116~14807
Dendrobium_GLEAN_10013582	scaffold18788	-	664~1080	659~13371
Dendrobium_GLEAN_10013592	scaffold18688	+	10007~12345	8712~12345
Dendrobium_GLEAN_10013601	scaffold18667	-	6053~12013	5736~12013
Dendrobium_GLEAN_10013602	scaffold18668	-	2072~15150	2072~15631
Dendrobium_GLEAN_10013613	scaffold18498	-	15787~16158	5958~16900
Dendrobium_GLEAN_10013614	scaffold18649	-	923~6123	304~8393
Dendrobium_GLEAN_10013621	Scaffold18643	-	7662~12854	7349~13247
Dendrobium_GLEAN_10013632	scaffold18632	+	4836~6840	4385~6877
Dendrobium_GLEAN_10013674	scaffold18594	+	2279~7124	1962~7512
Dendrobium_GLEAN_10013676	scaffold18594	-	9048~13781	6297~13795
Dendrobium_GLEAN_10013690	scaffold18589	-	3390~5283	3188~5525
Dendrobium_GLEAN_10013694	scaffold18589	-	12375~14040	8119~14040
Dendrobium_GLEAN_10013696	scaffold18582	-	7603~15896	6112~16021
Dendrobium_GLEAN_10013715	scaffold18572	-	1510~4551	1510~4972
Dendrobium_GLEAN_10013716	scaffold18572	-	8455~9030	5100~10266
Dendrobium_GLEAN_10013720	scaffold18269	+	15317~16701	13975~17071
Dendrobium_GLEAN_10013734	Scaffold18550	-	1418~4910	1217~7058
Dendrobium_GLEAN_10013735	Scaffold18550	-	8486~15867	8264~16473
Dendrobium_GLEAN_10013765	scaffold18243	-	4732~5416	4615~5537
Dendrobium_GLEAN_10013769	scaffold18500	-	8397~12175	8397~16220
Dendrobium_GLEAN_10013770	scaffold18684	+	1600~12704	30~12704
Dendrobium_GLEAN_10013776	Scaffold18509	-	5129~16245	4878~16245
Dendrobium_GLEAN_10013778	scaffold18583	+	4647~8980	4351~9400
Dendrobium_GLEAN_10013795	scaffold18492	+	1951~12841	1700~13013
Dendrobium_GLEAN_10013811	scaffold18607	+	5992~14172	5779~14931
Dendrobium_GLEAN_10013815	scaffold18192	+	8943~10228	8464~10478
Dendrobium_GLEAN_10013834	scaffold18494	+	10749~11933	10558~12019
Dendrobium_GLEAN_10013841	Scaffold18448	-	3627~4471	2643~5446
Dendrobium_GLEAN_10013845	scaffold18596	-	1660~4149	915~6572
Dendrobium_GLEAN_10013854	scaffold18441	+	15789~17215	15508~17215
Dendrobium_GLEAN_10013861	scaffold18115	+	3124~5460	3069~6245
Dendrobium_GLEAN_10013863	scaffold18293	-	6019~13205	2356~14478
Dendrobium_GLEAN_10013865	scaffold18436	-	1717~4188	1678~4837
Dendrobium_GLEAN_10013866	scaffold18436	-	4224~4677	84~4837
Dendrobium_GLEAN_10013876	scaffold18434	+	7327~8186	7027~11992
Dendrobium_GLEAN_10013885	scaffold18691	+	6391~13241	5538~13642
Dendrobium_GLEAN_10013899	scaffold18405	+	3371~6302	3273~7010
Dendrobium_GLEAN_10013912	scaffold18391	-	5035~6806	3146~12058
Dendrobium_GLEAN_10013913	scaffold18391	-	10149~11547	10149~12058
Dendrobium_GLEAN_10013918	scaffold18616	-	5875~13599	5875~15060
Dendrobium_GLEAN_10013919	scaffold18370	+	3678~4175	2543~4582
Dendrobium_GLEAN_10013923	scaffold18370	+	16697~17335	8891~17335
Dendrobium_GLEAN_10013933	scaffold18407	-	58~1604	58~14315
Dendrobium_GLEAN_10013945	scaffold18004	-	8084~17311	7976~17311
Dendrobium_GLEAN_10013961	scaffold18423	+	8982~12628	8809~14028
Dendrobium_GLEAN_10013967	Scaffold18350	+	13315~13704	13187~13865
Dendrobium_GLEAN_10013968	scaffold18412	+	2562~13031	1784~13228
Dendrobium_GLEAN_10013975	scaffold18349	-	5773~7803	5773~8137
Dendrobium_GLEAN_10013976	scaffold18373	+	13474~15366	13306~15366
Dendrobium_GLEAN_10013984	scaffold18334	+	3197~4303	815~5331
Dendrobium_GLEAN_10013985	scaffold18334	+	7051~8056	815~8555
Dendrobium_GLEAN_10013994	scaffold18050	-	590~2651	501~3129
Dendrobium_GLEAN_10013996	scaffold18050	+	9133~9803	8435~9849
Dendrobium_GLEAN_10013997	scaffold18050	+	14003~15394	13888~15552
Dendrobium_GLEAN_10013999	scaffold18895	-	4543~8703	4409~8703
Dendrobium_GLEAN_10014002	scaffold18343	+	5662~15550	5415~15550
Dendrobium_GLEAN_10014015	scaffold18305	-	6405~7643	6405~8496
Dendrobium_GLEAN_10014025	scaffold18299	-	6350~15645	5607~15645
Dendrobium_GLEAN_10014032	scaffold18285	+	12500~12838	12440~13137
Dendrobium_GLEAN_10014043	scaffold18297	+	13602~16262	310~16626
Dendrobium_GLEAN_10014046	Scaffold18272	+	5766~6671	2623~8272
Dendrobium_GLEAN_10014049	scaffold18444	+	4045~9698	2141~10087
Dendrobium_GLEAN_10014056	scaffold18220	-	4287~7961	4169~8149
Dendrobium_GLEAN_10014068	scaffold18513	-	8422~9749	8043~9890
Dendrobium_GLEAN_10014073	scaffold18556	+	2089~4854	1832~5109
Dendrobium_GLEAN_10014075	scaffold18556	+	15403~16008	15180~16668
Dendrobium_GLEAN_10014079	scaffold18353	+	8393~15856	8245~16079
Dendrobium_GLEAN_10014081	scaffold18254	-	7813~11117	7526~11121
Dendrobium_GLEAN_10014101	scaffold18242	-	11226~12482	10306~12693
Dendrobium_GLEAN_10014102	scaffold18242	-	16831~17489	15448~17549
Dendrobium_GLEAN_10014108	scaffold18270	+	86~7139	86~7487
Dendrobium_GLEAN_10014111	scaffold18255	-	200~4251	200~16654
Dendrobium_GLEAN_10014112	scaffold18228	-	9228~16014	9228~16283
Dendrobium_GLEAN_10014117	scaffold18257	+	14935~16910	14665~17477
Dendrobium_GLEAN_10014128	scaffold18232	-	9542~16598	9221~16598
Dendrobium_GLEAN_10014129	scaffold18507	+	919~16749	227~16749
Dendrobium_GLEAN_10014136	scaffold17993	+	8959~13012	3198~13012
Dendrobium_GLEAN_10014140	scaffold18437	+	10051~11171	10008~13194
Dendrobium_GLEAN_10014147	scaffold18200	+	11406~13580	10693~13980
Dendrobium_GLEAN_10014148	scaffold18742	+	3084~4817	2570~4817
Dendrobium_GLEAN_10014149	scaffold18742	+	6885~14559	2570~14559
Dendrobium_GLEAN_10014162	scaffold18249	-	1742~16618	1742~17638
Dendrobium_GLEAN_10014165	Scaffold18188	-	2398~4809	2055~4809
Dendrobium_GLEAN_10014166	Scaffold18188	-	8033~16105	3941~16105
Dendrobium_GLEAN_10014174	scaffold18287	-	2166~9163	2047~12013
Dendrobium_GLEAN_10014180	scaffold18197	+	1393~11823	1269~11883
Dendrobium_GLEAN_10014185	scaffold18164	+	3842~14952	3814~14952
Dendrobium_GLEAN_10014187	scaffold18250	+	11761~12283	11428~16601
Dendrobium_GLEAN_10014202	scaffold18157	+	4054~8605	4054~8914
Dendrobium_GLEAN_10014219	scaffold18146	-	14716~15036	5409~15137
Dendrobium_GLEAN_10014224	scaffold18168	+	13608~17380	12815~17701
Dendrobium_GLEAN_10014251	scaffold18129	-	524~7213	325~7459
Dendrobium_GLEAN_10014266	scaffold18120	-	14411~15283	14168~17729
Dendrobium_GLEAN_10014275	Scaffold18117	-	674~6697	44~7308
Dendrobium_GLEAN_10014277	Scaffold18117	-	9195~15236	44~15364
Dendrobium_GLEAN_10014278	scaffold18317	-	818~9409	433~9724
Dendrobium_GLEAN_10014283	scaffold18280	+	4349~16973	4349~17411
Dendrobium_GLEAN_10014290	scaffold18100	-	747~2342	560~17396
Dendrobium_GLEAN_10014297	scaffold18239	+	1579~3830	1560~3940
Dendrobium_GLEAN_10014299	scaffold18239	-	11942~13092	11670~13092
Dendrobium_GLEAN_10014301	scaffold18098	-	1118~2368	904~6949
Dendrobium_GLEAN_10014317	scaffold18119	-	1886~6987	697~12804
Dendrobium_GLEAN_10014326	scaffold18083	+	10291~17293	9830~17293
Dendrobium_GLEAN_10014341	scaffold18071	-	166~5367	166~8684
Dendrobium_GLEAN_10014355	scaffold17817	+	6590~10004	6403~17146
Dendrobium_GLEAN_10014356	scaffold18059	-	6102~8665	5844~10671
Dendrobium_GLEAN_10014358	scaffold18038	-	7145~16174	1741~16174
Dendrobium_GLEAN_10014360	scaffold18229	+	1974~4625	1861~8187
Dendrobium_GLEAN_10014395	scaffold18158	-	4621~13919	4355~14169
Dendrobium_GLEAN_10014416	scaffold18183	+	1675~3827	1675~5017
Dendrobium_GLEAN_10014424	scaffold18167	+	7748~10981	7748~11145
Dendrobium_GLEAN_10014426	scaffold18167	-	13039~17831	12926~17831
Dendrobium_GLEAN_10014458	scaffold17928	-	12039~15475	11972~15731
Dendrobium_GLEAN_10014475	scaffold17967	-	7657~10229	7657~10447
Dendrobium_GLEAN_10014482	scaffold17989	+	6517~11726	6358~11726
Dendrobium_GLEAN_10014494	Scaffold17948	+	2185~8746	2053~9142
Dendrobium_GLEAN_10014504	scaffold17941	-	3741~7974	3621~12837
Dendrobium_GLEAN_10014516	scaffold17857	+	7756~11817	7718~14254
Dendrobium_GLEAN_10014531	scaffold17910	+	9598~10701	8542~10755
Dendrobium_GLEAN_10014534	scaffold17904	-	199~3189	80~6118
Dendrobium_GLEAN_10014537	scaffold17877	+	6884~7792	6418~7876
Dendrobium_GLEAN_10014549	scaffold17894	-	10853~17444	8628~17444
Dendrobium_GLEAN_10014556	scaffold17880	-	9148~15943	1315~15943
Dendrobium_GLEAN_10014565	scaffold17887	+	5011~9739	4800~9770
Dendrobium_GLEAN_10014569	scaffold17887	+	13481~17799	4588~18026
Dendrobium_GLEAN_10014573	scaffold18140	+	12377~13738	11804~15355
Dendrobium_GLEAN_10014574	scaffold18140	+	14590~15219	13799~15355
Dendrobium_GLEAN_10014578	scaffold17944	+	13355~15645	1897~15965
Dendrobium_GLEAN_10014579	scaffold17859	-	465~6459	465~7046
Dendrobium_GLEAN_10014588	scaffold17868	-	2550~15817	2550~15977
Dendrobium_GLEAN_10014589	scaffold17853	-	7457~17049	7272~17049
Dendrobium_GLEAN_10014597	scaffold17784	-	4117~5337	268~5673
Dendrobium_GLEAN_10014608	scaffold17554	+	14843~17265	5831~18161
Dendrobium_GLEAN_10014611	Scaffold17833	-	13879~15556	13879~15756
Dendrobium_GLEAN_10014618	scaffold18174	+	13852~14162	1674~14476
Dendrobium_GLEAN_10014629	scaffold17820	-	98~6754	98~7287
Dendrobium_GLEAN_10014636	scaffold17840	-	8246~9379	8202~18184
Dendrobium_GLEAN_10014637	scaffold17818	-	7102~10571	1574~10580
Dendrobium_GLEAN_10014640	scaffold17834	-	15874~18031	11490~18031
Dendrobium_GLEAN_10014662	scaffold18219	-	7358~7966	7253~7982
Dendrobium_GLEAN_10014670	Scaffold17799	+	5704~16877	5422~17249
Dendrobium_GLEAN_10014672	scaffold17796	+	6902~7751	6756~7811
Dendrobium_GLEAN_10014699	scaffold17813	-	5449~8642	1114~10307
Dendrobium_GLEAN_10014710	scaffold17862	-	1498~2798	1477~2798
Dendrobium_GLEAN_10014711	scaffold17862	-	3174~18009	1266~18009
Dendrobium_GLEAN_10014736	Scaffold17763	+	10768~11673	10648~17993
Dendrobium_GLEAN_10014762	scaffold17750	+	1475~2557	1360~16792
Dendrobium_GLEAN_10014765	scaffold17777	+	4451~7150	3835~7212
Dendrobium_GLEAN_10014771	scaffold17898	+	1205~6967	149~6967
Dendrobium_GLEAN_10014778	Scaffold17743	+	1386~10310	638~12036
Dendrobium_GLEAN_10014794	scaffold18025	-	163~17662	58~17662
Dendrobium_GLEAN_10014799	scaffold17907	+	13762~14930	13652~15471
Dendrobium_GLEAN_10014815	scaffold17979	+	10319~15640	3234~15640
Dendrobium_GLEAN_10014832	scaffold17699	-	13894~17592	13762~17857
Dendrobium_GLEAN_10014841	scaffold17697	-	15434~16876	12274~16893
Dendrobium_GLEAN_10014847	scaffold17969	-	15292~17658	15058~17658
Dendrobium_GLEAN_10014852	scaffold17718	+	7075~7815	7022~8536
Dendrobium_GLEAN_10014855	scaffold17710	+	11669~15918	11517~15918
Dendrobium_GLEAN_10014863	scaffold17684	+	2394~5095	2328~15047
Dendrobium_GLEAN_10014904	scaffold17646	+	2767~5845	2767~6120
Dendrobium_GLEAN_10014915	scaffold17865	+	3737~15527	3306~15750
Dendrobium_GLEAN_10014924	scaffold17626	-	662~1290	662~1373
Dendrobium_GLEAN_10014930	scaffold17652	+	13421~17456	13160~18483
Dendrobium_GLEAN_10014931	scaffold17619	-	4001~12101	529~12188
Dendrobium_GLEAN_10014955	scaffold17593	-	11048~14105	11~14407
Dendrobium_GLEAN_10014958	scaffold17573	-	4613~12837	4268~12837
Dendrobium_GLEAN_10014973	scaffold17579	-	2471~8485	1353~8485
Dendrobium_GLEAN_10014978	Scaffold17569	-	2114~15340	1828~18334
Dendrobium_GLEAN_10014980	scaffold17583	-	404~3318	5~3411
Dendrobium_GLEAN_10014982	scaffold17583	-	7034~8050	6527~8162
Dendrobium_GLEAN_10014983	scaffold17691	+	6267~6587	6207~7550
Dendrobium_GLEAN_10014984	scaffold17691	+	12808~15840	6207~16138
Dendrobium_GLEAN_10014994	scaffold17639	-	14094~18279	14094~18582
Dendrobium_GLEAN_10014995	scaffold17670	-	2417~5172	1606~13037
Dendrobium_GLEAN_10015008	scaffold17388	+	11675~13672	11675~13746
Dendrobium_GLEAN_10015012	scaffold17551	+	6679~17256	6679~17313
Dendrobium_GLEAN_10015019	scaffold17491	-	2389~9162	2382~9385
Dendrobium_GLEAN_10015021	scaffold17552	-	141~7731	141~7915
Dendrobium_GLEAN_10015038	scaffold17539	+	6187~15439	6187~16169
Dendrobium_GLEAN_10015042	scaffold17537	+	7278~10867	6673~18265
Dendrobium_GLEAN_10015043	scaffold17530	+	9102~11402	9102~11749
Dendrobium_GLEAN_10015052	scaffold17649	+	7596~15123	7596~15159
Dendrobium_GLEAN_10015056	scaffold17524	-	10187~12100	9789~15035
Dendrobium_GLEAN_10015062	scaffold17493	+	13373~17522	9136~17522
Dendrobium_GLEAN_10015079	scaffold17508	+	8240~18080	8240~18681
Dendrobium_GLEAN_10015087	scaffold17503	-	7251~14045	7156~14045
Dendrobium_GLEAN_10015108	scaffold17522	+	1110~1859	182~2179
Dendrobium_GLEAN_10015110	scaffold17522	-	11981~12343	11981~12493
Dendrobium_GLEAN_10015114	scaffold17484	+	6247~9563	6108~10850
Dendrobium_GLEAN_10015141	scaffold17467	-	302~5108	302~14189
Dendrobium_GLEAN_10015159	scaffold17461	+	7798~17857	7575~18754
Dendrobium_GLEAN_10015166	scaffold17452	+	1187~3853	32~12012
Dendrobium_GLEAN_10015168	scaffold17452	-	5005~5805	3547~6197
Dendrobium_GLEAN_10015171	scaffold17662	+	2642~6347	2642~6484
Dendrobium_GLEAN_10015172	scaffold17662	+	6816~17637	6816~18220
Dendrobium_GLEAN_10015177	scaffold17231	+	2655~15996	2655~18737
Dendrobium_GLEAN_10015179	scaffold17231	+	17446~18355	17446~18737
Dendrobium_GLEAN_10015204	scaffold17430	+	4897~18357	4748~18357
Dendrobium_GLEAN_10015222	scaffold17580	+	7606~9073	6429~9073
Dendrobium_GLEAN_10015224	scaffold17580	+	9932~15005	6429~15036
Dendrobium_GLEAN_10015231	scaffold17683	+	6091~8081	6091~8778
Dendrobium_GLEAN_10015234	Scaffold17406	-	10663~11761	10624~11803
Dendrobium_GLEAN_10015238	Scaffold17400	+	11527~12672	11283~13413
Dendrobium_GLEAN_10015260	scaffold17369	-	5019~7836	4752~8428
Dendrobium_GLEAN_10015272	scaffold17367	+	8610~16201	6245~16201
Dendrobium_GLEAN_10015279	scaffold17362	+	13929~15511	166~15755
Dendrobium_GLEAN_10015290	scaffold17357	-	17063~18682	15028~18857
Dendrobium_GLEAN_10015296	scaffold17354	-	5047~7481	4913~7754
Dendrobium_GLEAN_10015298	scaffold17349	-	7430~9337	7285~9915
Dendrobium_GLEAN_10015299	scaffold17349	-	16085~18639	15889~18741
Dendrobium_GLEAN_10015336	scaffold17229	-	8214~10292	7695~11052
Dendrobium_GLEAN_10015357	scaffold17557	+	9377~11669	9377~11886
Dendrobium_GLEAN_10015360	scaffold17319	-	7032~10678	7032~14736
Dendrobium_GLEAN_10015365	scaffold17288	-	5525~8652	5525~9991
Dendrobium_GLEAN_10015367	scaffold17288	-	17492~18065	17322~18075
Dendrobium_GLEAN_10015368	Scaffold17292	-	181~18992	1~18992
Dendrobium_GLEAN_10015386	scaffold17245	+	9539~9901	6253~9963
Dendrobium_GLEAN_10015412	scaffold17353	-	5026~6939	4054~7894
Dendrobium_GLEAN_10015416	scaffold17241	+	13752~14345	7439~14408
Dendrobium_GLEAN_10015421	scaffold17259	-	6413~7858	6165~8040
Dendrobium_GLEAN_10015434	scaffold17266	-	4255~8202	4200~8202
Dendrobium_GLEAN_10015437	scaffold17236	-	5537~11856	5354~11856
Dendrobium_GLEAN_10015452	Scaffold17232	-	7395~9729	7395~13785
Dendrobium_GLEAN_10015455	scaffold17257	+	3767~7820	3767~19177
Dendrobium_GLEAN_10015469	scaffold17219	-	14959~15861	14474~16014
Dendrobium_GLEAN_10015492	scaffold17318	+	15475~16959	15297~18397
Dendrobium_GLEAN_10015517	scaffold17218	-	10662~16389	4537~16953
Dendrobium_GLEAN_10015520	scaffold17177	+	9109~13655	9101~19159
Dendrobium_GLEAN_10015525	scaffold17210	+	2399~9632	2107~9710
Dendrobium_GLEAN_10015530	scaffold17352	-	209~3706	209~3989
Dendrobium_GLEAN_10015532	scaffold17352	-	14498~16496	14164~16729
Dendrobium_GLEAN_10015536	scaffold17161	+	2990~4751	2923~5366
Dendrobium_GLEAN_10015540	scaffold17166	+	5198~8992	5015~9291
Dendrobium_GLEAN_10015624	scaffold16957	+	9810~18952	9810~19169
Dendrobium_GLEAN_10015633	scaffold17047	+	11190~18758	10929~18758
Dendrobium_GLEAN_10015653	Scaffold17084	-	317~3677	317~4188
Dendrobium_GLEAN_10015654	Scaffold17084	-	5198~16357	5119~16505
Dendrobium_GLEAN_10015661	scaffold17270	-	7833~16439	7698~19213
Dendrobium_GLEAN_10015683	scaffold16854	-	742~18504	280~18504
Dendrobium_GLEAN_10015686	scaffold17076	+	170~9509	100~9727
Dendrobium_GLEAN_10015687	scaffold17095	-	436~4952	139~5449
Dendrobium_GLEAN_10015690	scaffold17338	-	12233~12820	11369~13158
Dendrobium_GLEAN_10015696	scaffold17661	-	427~1520	6~1542
Dendrobium_GLEAN_10015699	scaffold17661	-	14783~17870	5372~18186
Dendrobium_GLEAN_10015703	scaffold17337	-	5808~16922	5697~17404
Dendrobium_GLEAN_10015722	scaffold17027	+	10569~11837	10293~12499
Dendrobium_GLEAN_10015746	scaffold16982	+	8076~16807	7914~16807
Dendrobium_GLEAN_10015759	scaffold17085	-	13469~15915	13469~16058
Dendrobium_GLEAN_10015766	scaffold16995	-	4259~6712	4217~6712
Dendrobium_GLEAN_10015767	scaffold16995	-	10706~15128	4217~15316
Dendrobium_GLEAN_10015773	scaffold16915	-	8961~10043	8280~10043
Dendrobium_GLEAN_10015786	scaffold17252	+	7509~16961	7302~18111
Dendrobium_GLEAN_10015800	scaffold16971	-	15291~18422	14971~19609
Dendrobium_GLEAN_10015801	scaffold16971	-	19007~19565	14971~19589
Dendrobium_GLEAN_10015802	scaffold17138	+	16041~18996	106~18996
Dendrobium_GLEAN_10015815	scaffold16964	-	2656~4065	2656~4138
Dendrobium_GLEAN_10015828	scaffold16912	+	15850~19388	11818~19609
Dendrobium_GLEAN_10015865	Scaffold16942	+	11295~17775	11190~18619
Dendrobium_GLEAN_10015872	scaffold16936	-	1693~10443	508~13258
Dendrobium_GLEAN_10015874	scaffold16933	-	13671~15548	2879~15548
Dendrobium_GLEAN_10015893	scaffold16916	+	17583~19370	17527~19370
Dendrobium_GLEAN_10015894	scaffold17230	-	137~2699	137~2961
Dendrobium_GLEAN_10015897	scaffold16929	-	1001~9519	950~9603
Dendrobium_GLEAN_10015914	scaffold16874	+	4845~19630	4174~19630
Dendrobium_GLEAN_10015922	scaffold16946	-	12647~16320	12647~16364
Dendrobium_GLEAN_10015928	scaffold17050	+	6526~8642	6526~19590
Dendrobium_GLEAN_10015935	scaffold16881	-	9313~15139	9313~19699
Dendrobium_GLEAN_10015942	scaffold16859	-	3788~16968	3788~17279
Dendrobium_GLEAN_10015950	scaffold16851	-	2160~10155	1446~10825
Dendrobium_GLEAN_10015985	scaffold16705	+	1560~2927	1560~3660
Dendrobium_GLEAN_10015986	scaffold16705	+	5495~13378	4867~13854
Dendrobium_GLEAN_10015987	scaffold16705	+	16323~16808	16274~18140
Dendrobium_GLEAN_10015989	scaffold16858	+	8580~15017	8580~15390
Dendrobium_GLEAN_10015993	scaffold16844	+	6119~15118	2016~15118
Dendrobium_GLEAN_10016000	scaffold16835	+	7618~10962	6896~10962
Dendrobium_GLEAN_10016003	scaffold16875	+	5235~5537	4813~5725
Dendrobium_GLEAN_10016007	scaffold16890	+	12740~13104	12632~14671
Dendrobium_GLEAN_10016016	scaffold17340	+	8123~12995	7063~13089
Dendrobium_GLEAN_10016018	scaffold17340	+	17724~18992	17630~19179
Dendrobium_GLEAN_10016028	scaffold16739	-	2534~3547	2534~3557
Dendrobium_GLEAN_10016030	scaffold16739	+	6751~7758	5146~8557
Dendrobium_GLEAN_10016032	scaffold16739	+	10470~10982	7897~18051
Dendrobium_GLEAN_10016048	scaffold16588	-	248~5872	141~5872
Dendrobium_GLEAN_10016049	scaffold16588	-	6369~12862	141~12869
Dendrobium_GLEAN_10016060	scaffold16780	+	739~1704	739~13046
Dendrobium_GLEAN_10016061	scaffold16777	+	2815~3606	2813~8379
Dendrobium_GLEAN_10016062	scaffold16777	+	3622~8379	4791~6518
Dendrobium_GLEAN_10016063	scaffold16777	-	9654~11789	9654~12035
Dendrobium_GLEAN_10016065	scaffold16774	-	3999~4463	3999~6828
Dendrobium_GLEAN_10016071	scaffold16901	-	14226~15949	13908~16376
Dendrobium_GLEAN_10016081	scaffold17006	-	5207~5524	5007~6828
Dendrobium_GLEAN_10016095	Scaffold16747	+	9131~19799	291~19867
Dendrobium_GLEAN_10016097	scaffold16742	+	9869~11914	2061~12367
Dendrobium_GLEAN_10016101	scaffold16718	-	12575~13189	12151~13576
Dendrobium_GLEAN_10016102	scaffold16718	+	16876~17609	16830~17609
Dendrobium_GLEAN_10016105	scaffold16623	-	12297~17325	5419~17750
Dendrobium_GLEAN_10016108	scaffold16735	+	9147~12967	3868~19570
Dendrobium_GLEAN_10016124	scaffold17156	+	4738~8121	4574~13751
Dendrobium_GLEAN_10016125	scaffold17156	+	11666~13423	11666~13751
Dendrobium_GLEAN_10016127	scaffold16720	-	15089~19817	7933~19905
Dendrobium_GLEAN_10016133	scaffold16778	-	12942~18473	12768~18662
Dendrobium_GLEAN_10016137	scaffold16850	-	13045~14218	1518~14218
Dendrobium_GLEAN_10016151	scaffold16703	+	1552~12748	1188~19066
Dendrobium_GLEAN_10016153	scaffold16895	-	6995~9202	6268~9228
Dendrobium_GLEAN_10016161	scaffold16689	-	2726~10071	2508~10071
Dendrobium_GLEAN_10016181	scaffold16676	+	571~1263	561~1263
Dendrobium_GLEAN_10016186	scaffold16810	-	6800~11321	6556~11321
Dendrobium_GLEAN_10016201	scaffold16896	+	8276~16547	8042~16547
Dendrobium_GLEAN_10016221	scaffold16639	+	2~2837	1~12968
Dendrobium_GLEAN_10016232	scaffold16626	-	10795~12707	10718~12707
Dendrobium_GLEAN_10016234	scaffold16880	-	16416~19176	16113~20136
Dendrobium_GLEAN_10016239	scaffold16539	-	10235~11026	6834~18086
Dendrobium_GLEAN_10016247	scaffold16634	-	8836~10812	6388~11212
Dendrobium_GLEAN_10016252	scaffold16671	-	13778~14656	11538~14875
Dendrobium_GLEAN_10016276	scaffold16602	+	9595~18070	9576~18070
Dendrobium_GLEAN_10016279	scaffold16586	+	12085~20075	11178~20188
Dendrobium_GLEAN_10016293	scaffold16576	+	11204~17407	9742~17407
Dendrobium_GLEAN_10016297	scaffold16564	-	12349~19847	12349~20226
Dendrobium_GLEAN_10016302	scaffold16523	+	7894~19323	1684~19488
Dendrobium_GLEAN_10016306	scaffold16558	-	10859~11266	10505~13198
Dendrobium_GLEAN_10016307	scaffold16558	-	12854~13198	12357~12813
Dendrobium_GLEAN_10016309	scaffold16807	-	1076~7526	504~15483
Dendrobium_GLEAN_10016311	scaffold169171	-	3624~4190	3202~4190
Dendrobium_GLEAN_10016313	scaffold169171	+	7144~8761	7144~11537
Dendrobium_GLEAN_10016321	scaffold169171	+	15644~16454	15644~17508
Dendrobium_GLEAN_10016328	scaffold16444	-	10604~20044	10604~20136
Dendrobium_GLEAN_10016337	scaffold16542	-	1510~9371	1510~10694
Dendrobium_GLEAN_10016349	scaffold16573	-	14929~17528	13972~17802
Dendrobium_GLEAN_10016370	scaffold16529	-	2228~6347	2228~9297
Dendrobium_GLEAN_10016382	scaffold16535	+	5627~8824	2410~9247
Dendrobium_GLEAN_10016389	scaffold17020	-	13703~15702	10531~15777
Dendrobium_GLEAN_10016396	scaffold163900	+	5898~6629	5448~6629
Dendrobium_GLEAN_10016399	scaffold16907	-	6073~18401	4990~18401
Dendrobium_GLEAN_10016400	scaffold16556	+	195~5342	11~5342
Dendrobium_GLEAN_10016423	scaffold16601	+	946~7810	515~8687
Dendrobium_GLEAN_10016424	scaffold16601	+	16612~20261	16396~20332
Dendrobium_GLEAN_10016427	scaffold16474	-	14710~18565	71~18565
Dendrobium_GLEAN_10016453	scaffold16479	-	8006~10105	7832~10217
Dendrobium_GLEAN_10016467	scaffold16587	-	10078~15010	9725~15010
Dendrobium_GLEAN_10016472	scaffold16473	+	10212~10583	9749~13678
Dendrobium_GLEAN_10016473	scaffold16473	-	12629~14093	10433~14392
Dendrobium_GLEAN_10016474	scaffold16473	+	17005~18381	16238~18381
Dendrobium_GLEAN_10016496	scaffold16460	-	2739~8649	2398~8687
Dendrobium_GLEAN_10016498	scaffold16417	+	14987~19967	14925~19967
Dendrobium_GLEAN_10016504	scaffold16445	-	19158~19742	17384~20359
Dendrobium_GLEAN_10016505	scaffold16478	+	13311~20173	13197~20397
Dendrobium_GLEAN_10016507	scaffold16430	+	10577~18413	934~18413
Dendrobium_GLEAN_10016516	scaffold16443	-	1250~13869	699~13869
Dendrobium_GLEAN_10016517	scaffold16443	+	14283~15104	14201~15360
Dendrobium_GLEAN_10016522	scaffold16396	+	9271~9872	9271~10013
Dendrobium_GLEAN_10016529	scaffold16458	+	8819~16255	8507~16672
Dendrobium_GLEAN_10016532	scaffold16434	+	18122~19177	17891~19177
Dendrobium_GLEAN_10016537	scaffold16431	-	6079~7511	5847~7748
Dendrobium_GLEAN_10016542	scaffold16518	+	9513~19933	4779~20194
Dendrobium_GLEAN_10016549	scaffold16690	+	9926~10922	9917~10960
Dendrobium_GLEAN_10016557	scaffold16422	+	19051~20386	18751~20386
Dendrobium_GLEAN_10016574	scaffold16409	+	9060~13820	8879~14239
Dendrobium_GLEAN_10016583	scaffold16385	-	409~6117	409~6351
Dendrobium_GLEAN_10016600	scaffold16502	+	12600~17135	12043~17545
Dendrobium_GLEAN_10016604	scaffold16566	-	2698~7947	2449~18078
Dendrobium_GLEAN_10016606	scaffold16566	-	13396~17731	13396~18070
Dendrobium_GLEAN_10016615	scaffold16357	-	862~8146	449~8146
Dendrobium_GLEAN_10016641	scaffold16346	-	3299~8208	2905~9882
Dendrobium_GLEAN_10016669	scaffold16314	-	9091~14400	1836~14400
Dendrobium_GLEAN_10016673	scaffold16534	+	18935~20422	18432~20499
Dendrobium_GLEAN_10016676	scaffold16349	-	17470~18303	4678~18903
Dendrobium_GLEAN_10016678	scaffold16506	-	543~14365	353~15577
Dendrobium_GLEAN_10016685	scaffold16340	-	19407~20072	12624~20116
Dendrobium_GLEAN_10016689	scaffold16592	-	506~2136	353~12838
Dendrobium_GLEAN_10016690	scaffold16592	-	6159~11709	6159~12824
Dendrobium_GLEAN_10016761	scaffold16318	+	3269~20509	90~20509
Dendrobium_GLEAN_10016767	scaffold16530	-	1529~4731	363~4921
Dendrobium_GLEAN_10016769	scaffold16530	-	9230~18592	363~18635
Dendrobium_GLEAN_10016785	scaffold16356	+	6745~8373	6566~8762
Dendrobium_GLEAN_10016790	scaffold16489	+	12540~13779	12540~15419
Dendrobium_GLEAN_10016797	scaffold16352	-	12400~15265	11785~15379
Dendrobium_GLEAN_10016801	scaffold16301	-	633~14846	428~15063
Dendrobium_GLEAN_10016809	scaffold16300	+	1557~2366	1314~2908
Dendrobium_GLEAN_10016831	scaffold16195	+	10931~20404	9527~20404
Dendrobium_GLEAN_10016837	scaffold16740	+	14714~16555	1942~16819
Dendrobium_GLEAN_10016838	scaffold16278	+	2572~6953	2572~7003
Dendrobium_GLEAN_10016876	scaffold16257	-	3518~4099	3307~4859
Dendrobium_GLEAN_10016882	scaffold16532	-	2762~5444	1668~20651
Dendrobium_GLEAN_10016907	scaffold16253	+	4895~6624	4794~6624
Dendrobium_GLEAN_10016910	scaffold16236	+	14365~15549	13961~16160
Dendrobium_GLEAN_10016911	scaffold16234	+	10803~11150	8582~11778
Dendrobium_GLEAN_10016918	scaffold16187	-	1871~11361	1871~11578
Dendrobium_GLEAN_10016929	scaffold16206	+	10430~15149	10194~15426
Dendrobium_GLEAN_10016931	scaffold16289	-	10909~15660	10909~18296
Dendrobium_GLEAN_10016938	scaffold16355	+	9040~11741	7083~13508
Dendrobium_GLEAN_10016942	scaffold16196	+	15507~16681	15402~17140
Dendrobium_GLEAN_10016944	scaffold16125	+	327~1702	327~1908
Dendrobium_GLEAN_10016945	scaffold16125	-	2259~12438	668~12808
Dendrobium_GLEAN_10016947	scaffold16212	+	6302~10437	5913~19720
Dendrobium_GLEAN_10016950	scaffold16194	-	10454~12993	4344~13422
Dendrobium_GLEAN_10016956	scaffold16304	+	6639~19127	6639~20232
Dendrobium_GLEAN_10016963	scaffold16279	+	1370~3700	42~13657
Dendrobium_GLEAN_10016964	scaffold16279	+	4610~13310	116~20335
Dendrobium_GLEAN_10016975	scaffold16174	-	11068~17421	11068~17719
Dendrobium_GLEAN_10016978	scaffold16481	+	10182~16915	10092~16915
Dendrobium_GLEAN_10016981	scaffold16232	-	6516~13349	6199~20440
Dendrobium_GLEAN_10016995	scaffold16160	-	15945~19774	610~19774
Dendrobium_GLEAN_10017006	scaffold16167	-	1212~1715	1070~2743
Dendrobium_GLEAN_10017009	scaffold16167	-	9224~9535	6470~9737
Dendrobium_GLEAN_10017017	scaffold16176	-	6457~8403	6090~8470
Dendrobium_GLEAN_10017026	scaffold16145	+	17217~20132	10501~20132
Dendrobium_GLEAN_10017034	scaffold16099	+	12383~20562	2575~20562
Dendrobium_GLEAN_10017042	scaffold16139	-	4390~6101	3393~4142
Dendrobium_GLEAN_10017043	scaffold16139	-	7016~11117	3381~17771
Dendrobium_GLEAN_10017045	scaffold16267	-	3025~14299	2859~14299
Dendrobium_GLEAN_10017062	scaffold16111	-	5631~16067	5288~17629
Dendrobium_GLEAN_10017074	scaffold16113	-	11645~19671	11645~19757
Dendrobium_GLEAN_10017076	scaffold16038	+	441~10516	433~10516
Dendrobium_GLEAN_10017078	scaffold16038	-	13621~14257	13470~19985
Dendrobium_GLEAN_10017079	scaffold16038	-	19412~19985	13470~19985
Dendrobium_GLEAN_10017100	scaffold16103	+	3622~4820	2995~4872
Dendrobium_GLEAN_10017102	scaffold16103	-	8506~11523	7238~11899
Dendrobium_GLEAN_10017108	scaffold16097	-	7791~9606	7613~21007
Dendrobium_GLEAN_10017127	scaffold16244	-	9448~11245	9189~14441
Dendrobium_GLEAN_10017134	scaffold16254	-	371~2885	371~3716
Dendrobium_GLEAN_10017136	scaffold16254	+	15469~15903	15264~20749
Dendrobium_GLEAN_10017137	scaffold16254	-	17296~19756	15669~20749
Dendrobium_GLEAN_10017147	Scaffold16063	+	903~11853	411~11869
Dendrobium_GLEAN_10017148	Scaffold16063	+	14005~15707	13098~15777
Dendrobium_GLEAN_10017150	scaffold16568	+	6809~9505	3717~9505
Dendrobium_GLEAN_10017155	scaffold16056	+	11467~12180	11455~13323
Dendrobium_GLEAN_10017164	scaffold16046	-	13336~18415	11796~18431
Dendrobium_GLEAN_10017165	Scaffold16043	+	2406~5880	2335~5934
Dendrobium_GLEAN_10017174	scaffold16044	-	9252~14633	2460~14803
Dendrobium_GLEAN_10017199	scaffold16089	+	5535~8633	5078~9061
Dendrobium_GLEAN_10017211	scaffold16404	-	3623~10918	3623~11115
Dendrobium_GLEAN_10017214	scaffold16059	+	6057~6998	5870~6998
Dendrobium_GLEAN_10017219	scaffold15956	+	14080~20763	13802~21072
Dendrobium_GLEAN_10017241	scaffold16217	-	513~16809	360~16809
Dendrobium_GLEAN_10017287	scaffold15945	+	3328~4167	2094~4763
Dendrobium_GLEAN_10017292	scaffold15861	-	17961~19040	17252~19040
Dendrobium_GLEAN_10017309	scaffold16182	+	7346~9382	3969~9382
Dendrobium_GLEAN_10017311	scaffold16233	+	7893~13259	7893~18156
Dendrobium_GLEAN_10017328	scaffold15943	+	5942~7309	5942~8522
Dendrobium_GLEAN_10017334	scaffold16286	+	395~4727	174~4881
Dendrobium_GLEAN_10017335	scaffold16286	-	5896~10834	5877~10974
Dendrobium_GLEAN_10017336	scaffold16286	-	12265~20363	12128~20363
Dendrobium_GLEAN_10017342	scaffold16186	+	13821~15443	8785~15443
Dendrobium_GLEAN_10017345	scaffold15912	+	1544~3984	1~4645
Dendrobium_GLEAN_10017346	scaffold15912	-	10438~15017	6598~21215
Dendrobium_GLEAN_10017366	scaffold15874	+	1473~6101	1179~6385
Dendrobium_GLEAN_10017367	scaffold15874	-	7198~11284	7057~11907
Dendrobium_GLEAN_10017375	scaffold15890	-	6191~7996	6026~9110
Dendrobium_GLEAN_10017376	scaffold15890	-	8001~11266	6026~11266
Dendrobium_GLEAN_10017378	scaffold15890	-	11838~19366	11838~19535
Dendrobium_GLEAN_10017381	scaffold15734	+	211~14537	211~14782
Dendrobium_GLEAN_10017383	scaffold15903	-	66~5722	66~13322
Dendrobium_GLEAN_10017385	scaffold15948	+	3544~6621	3493~6703
Dendrobium_GLEAN_10017398	scaffold15730	-	1806~13619	1116~14325
Dendrobium_GLEAN_10017406	scaffold15873	+	7608~16073	6947~18844
Dendrobium_GLEAN_10017408	scaffold16480	-	3556~14698	3128~14795
Dendrobium_GLEAN_10017420	scaffold15878	-	57~9045	57~9078
Dendrobium_GLEAN_10017421	scaffold15878	-	11489~19671	11170~20155
Dendrobium_GLEAN_10017422	scaffold15860	-	1944~2344	1585~2807
Dendrobium_GLEAN_10017443	scaffold15446	-	14026~17603	9999~17603
Dendrobium_GLEAN_10017459	scaffold15849	-	15683~17065	7551~17464
Dendrobium_GLEAN_10017477	scaffold16153	+	8353~15243	35~15482
Dendrobium_GLEAN_10017478	scaffold16153	-	16023~18909	16023~18989
Dendrobium_GLEAN_10017481	scaffold15842	-	6154~6480	5728~6800
Dendrobium_GLEAN_10017485	scaffold16028	+	5179~6363	4608~16611
Dendrobium_GLEAN_10017506	scaffold15602	-	2834~3910	2460~4412
Dendrobium_GLEAN_10017510	scaffold15834	-	12214~19819	12214~21553
Dendrobium_GLEAN_10017518	scaffold15923	+	1093~9433	907~9577
Dendrobium_GLEAN_10017538	scaffold15927	-	7172~7516	7172~7716
Dendrobium_GLEAN_10017540	scaffold15927	+	12761~14152	12761~14398
Dendrobium_GLEAN_10017555	scaffold16255	+	12496~13089	12496~13745
Dendrobium_GLEAN_10017561	scaffold15803	-	10765~17726	10765~17918
Dendrobium_GLEAN_10017569	Scaffold15797	+	1964~3255	816~3255
Dendrobium_GLEAN_10017579	scaffold16078	+	15543~16670	15461~16772
Dendrobium_GLEAN_10017593	scaffold15823	+	10828~14142	10794~21622
Dendrobium_GLEAN_10017596	scaffold15884	-	10352~11689	10266~11738
Dendrobium_GLEAN_10017644	scaffold15748	+	9590~18760	1609~18903
Dendrobium_GLEAN_10017660	scaffold15743	+	2922~5126	2602~5490
Dendrobium_GLEAN_10017663	scaffold15549	+	5537~9705	5352~10016
Dendrobium_GLEAN_10017690	scaffold15507	-	313~10987	249~17605
Dendrobium_GLEAN_10017694	scaffold15897	-	7191~12566	6798~12566
Dendrobium_GLEAN_10017702	scaffold15719	+	11322~11633	11203~17446
Dendrobium_GLEAN_10017706	scaffold15714	+	14572~16410	11313~16922
Dendrobium_GLEAN_10017722	scaffold15708	-	15935~16985	14049~16985
Dendrobium_GLEAN_10017727	scaffold15710	+	12796~14602	12289~15537
Dendrobium_GLEAN_10017732	scaffold15704	-	4473~13952	4139~19703
Dendrobium_GLEAN_10017744	scaffold15691	+	7784~12631	7100~12987
Dendrobium_GLEAN_10017745	scaffold15690	+	14106~16256	13950~16469
Dendrobium_GLEAN_10017747	scaffold15758	-	4096~14685	4096~21042
Dendrobium_GLEAN_10017757	scaffold15862	+	5586~15587	5586~16940
Dendrobium_GLEAN_10017759	scaffold15674	-	3347~6183	3183~8978
Dendrobium_GLEAN_10017762	scaffold15736	-	5004~9068	257~9138
Dendrobium_GLEAN_10017766	scaffold15669	+	2971~6516	2872~6941
Dendrobium_GLEAN_10017767	scaffold15669	+	12084~14737	11797~19351
Dendrobium_GLEAN_10017768	scaffold15669	-	16773~21298	16501~21298
Dendrobium_GLEAN_10017771	scaffold15667	-	11556~14243	8698~14243
Dendrobium_GLEAN_10017814	scaffold16020	+	9688~10847	9688~11108
Dendrobium_GLEAN_10017815	scaffold15652	-	1289~2445	894~2445
Dendrobium_GLEAN_10017816	scaffold15537	-	2335~2823	1960~7985
Dendrobium_GLEAN_10017828	scaffold15642	+	105~9776	6~21777
Dendrobium_GLEAN_10017836	scaffold15635	+	17889~20428	17874~20761
Dendrobium_GLEAN_10017839	scaffold15469	-	582~2091	582~2811
Dendrobium_GLEAN_10017842	scaffold15469	+	19437~21390	18026~21906
Dendrobium_GLEAN_10017864	scaffold15625	+	19314~21805	19314~21864
Dendrobium_GLEAN_10017866	scaffold15827	+	12809~13249	12610~13929
Dendrobium_GLEAN_10017871	scaffold15623	+	20292~21921	8238~21921
Dendrobium_GLEAN_10017879	scaffold15845	-	7710~20074	5024~20257
Dendrobium_GLEAN_10017881	scaffold15644	+	11547~18830	11149~19342
Dendrobium_GLEAN_10017883	scaffold15663	+	6966~17929	6597~18057
Dendrobium_GLEAN_10017900	scaffold15817	+	17981~21291	17504~21291
Dendrobium_GLEAN_10017902	scaffold15429	-	1774~12161	1774~12897
Dendrobium_GLEAN_10017906	scaffold15638	-	5633~12889	5406~12889
Dendrobium_GLEAN_10017908	scaffold15811	+	4871~6442	4737~7929
Dendrobium_GLEAN_10017916	scaffold15627	-	16839~20566	922~21851
Dendrobium_GLEAN_10017917	scaffold15732	-	1139~1880	971~2208
Dendrobium_GLEAN_10017925	scaffold15583	-	8740~11496	8309~12368
Dendrobium_GLEAN_10017926	scaffold15580	+	18611~19027	17467~19327
Dendrobium_GLEAN_10017930	scaffold15569	-	3037~19357	2969~19744
Dendrobium_GLEAN_10017934	Scaffold15574	-	10362~16535	7690~21499
Dendrobium_GLEAN_10017937	scaffold15779	-	5480~16992	5480~17021
Dendrobium_GLEAN_10017939	scaffold15695	-	181~7212	181~21179
Dendrobium_GLEAN_10017950	scaffold15565	+	2502~10701	2222~21714
Dendrobium_GLEAN_10017969	Scaffold15551	+	17365~21898	7413~22087
Dendrobium_GLEAN_10017978	scaffold15542	-	12864~15156	10429~15952
Dendrobium_GLEAN_10017984	scaffold15494	+	17892~21092	17442~21340
Dendrobium_GLEAN_10017988	scaffold15535	-	12280~13385	7957~14708
Dendrobium_GLEAN_10017990	scaffold15535	+	17402~18532	17338~19363
Dendrobium_GLEAN_10017997	scaffold15588	-	12246~14526	12246~14627
Dendrobium_GLEAN_10018011	scaffold15519	+	13512~20346	13472~20346
Dendrobium_GLEAN_10018012	scaffold15533	+	12729~13040	12563~13616
Dendrobium_GLEAN_10018018	scaffold15505	+	1020~11754	699~12155
Dendrobium_GLEAN_10018021	scaffold15694	+	2698~3306	2616~3440
Dendrobium_GLEAN_10018022	scaffold15694	-	10230~10904	9928~15817
Dendrobium_GLEAN_10018024	scaffold15504	+	5721~20639	5504~20933
Dendrobium_GLEAN_10018031	scaffold15387	+	17038~21174	753~21670
Dendrobium_GLEAN_10018036	scaffold15871	+	3050~3556	2964~13105
Dendrobium_GLEAN_10018067	scaffold15522	-	129~7202	87~7221
Dendrobium_GLEAN_10018074	scaffold15833	+	12475~13382	12170~14894
Dendrobium_GLEAN_10018079	scaffold43352	+	11458~12189	11008~12189
Dendrobium_GLEAN_10018084	scaffold15757	-	448~13858	127~14256
Dendrobium_GLEAN_10018096	scaffold15473	+	17780~19057	16957~19251
Dendrobium_GLEAN_10018097	scaffold15595	+	3348~22208	2620~22208
Dendrobium_GLEAN_10018099	scaffold15470	-	12598~19494	11925~19494
Dendrobium_GLEAN_10018121	scaffold15682	+	8756~9151	8538~13009
Dendrobium_GLEAN_10018122	scaffold15682	+	15009~15614	15009~15840
Dendrobium_GLEAN_10018123	scaffold15292	+	3747~4767	3221~4818
Dendrobium_GLEAN_10018124	scaffold15292	-	6668~12538	6429~12640
Dendrobium_GLEAN_10018131	scaffold15634	+	21572~22180	17392~22180
Dendrobium_GLEAN_10018147	scaffold15597	+	16188~19019	14294~19019
Dendrobium_GLEAN_10018154	scaffold15791	-	3198~11478	3198~11512
Dendrobium_GLEAN_10018160	scaffold15791	+	17470~18178	17088~18855
Dendrobium_GLEAN_10018171	scaffold15441	+	10480~21759	1199~21959
Dendrobium_GLEAN_10018174	scaffold15410	+	14088~16270	5648~16270
Dendrobium_GLEAN_10018185	scaffold15575	+	14207~14521	14187~14674
Dendrobium_GLEAN_10018186	Scaffold15431	+	563~5681	563~6453
Dendrobium_GLEAN_10018189	Scaffold15431	-	15715~22019	8408~22212
Dendrobium_GLEAN_10018190	scaffold15616	+	2423~10703	1848~10703
Dendrobium_GLEAN_10018191	scaffold15616	+	12778~15797	12108~15797
Dendrobium_GLEAN_10018202	scaffold15402	+	11017~14900	3670~15190
Dendrobium_GLEAN_10018227	scaffold15525	-	6938~20924	988~21193
Dendrobium_GLEAN_10018229	scaffold15678	+	5614~6449	5563~6658
Dendrobium_GLEAN_10018235	scaffold15413	-	16838~17161	65~17277
Dendrobium_GLEAN_10018242	scaffold15615	-	15743~16873	10700~17242
Dendrobium_GLEAN_10018244	scaffold15761	+	8974~12294	8640~12554
Dendrobium_GLEAN_10018249	scaffold15400	+	9480~11760	1306~20813
Dendrobium_GLEAN_10018253	scaffold15610	+	314~1783	82~2294
Dendrobium_GLEAN_10018256	scaffold15610	-	7720~10527	6319~10687
Dendrobium_GLEAN_10018265	scaffold15395	+	4544~11910	4434~11910
Dendrobium_GLEAN_10018266	scaffold15395	+	15675~18644	13247~18644
Dendrobium_GLEAN_10018267	scaffold15395	+	20353~22038	13238~22038
Dendrobium_GLEAN_10018273	scaffold15310	+	16985~21620	1557~22139
Dendrobium_GLEAN_10018282	scaffold15850	+	21678~22109	41~22109
Dendrobium_GLEAN_10018295	scaffold15365	-	20930~21319	3746~21545
Dendrobium_GLEAN_10018327	scaffold15377	+	8013~14571	7604~17621
Dendrobium_GLEAN_10018328	scaffold15377	-	16103~16786	14136~17378
Dendrobium_GLEAN_10018342	scaffold15352	-	5868~6269	5196~6507
Dendrobium_GLEAN_10018343	scaffold15352	+	6360~6773	6122~6773
Dendrobium_GLEAN_10018344	Scaffold15349	+	2166~6252	1909~7212
Dendrobium_GLEAN_10018346	scaffold15343	+	6993~9110	6973~9124
Dendrobium_GLEAN_10018357	scaffold15338	+	3125~7781	2744~13499
Dendrobium_GLEAN_10018360	scaffold15338	-	18959~19642	18775~21298
Dendrobium_GLEAN_10018365	scaffold15324	+	5069~12231	4665~20044
Dendrobium_GLEAN_10018374	scaffold15317	-	19032~20258	18761~20615
Dendrobium_GLEAN_10018382	scaffold15314	-	8522~9043	8313~12306
Dendrobium_GLEAN_10018384	scaffold15314	-	13063~13605	10928~13734
Dendrobium_GLEAN_10018385	scaffold15530	-	431~2046	2~2046
Dendrobium_GLEAN_10018407	scaffold15432	+	1741~4204	1220~4489
Dendrobium_GLEAN_10018408	scaffold15432	-	4850~7407	4715~12089
Dendrobium_GLEAN_10018411	scaffold15570	-	4535~5046	2~5186
Dendrobium_GLEAN_10018412	scaffold15570	+	17041~21674	10698~21942
Dendrobium_GLEAN_10018422	scaffold15720	+	14797~20665	8919~22565
Dendrobium_GLEAN_10018425	scaffold15555	+	8412~9068	8095~9490
Dendrobium_GLEAN_10018426	scaffold15555	+	21167~21863	20992~21863
Dendrobium_GLEAN_10018429	scaffold14712	+	9422~16685	7096~16685
Dendrobium_GLEAN_10018431	scaffold15297	-	18820~20608	18820~21009
Dendrobium_GLEAN_10018432	scaffold15312	+	1388~18668	1286~18976
Dendrobium_GLEAN_10018444	scaffold15287	+	20451~22352	16209~22596
Dendrobium_GLEAN_10018446	scaffold15368	-	7265~10560	6793~10530
Dendrobium_GLEAN_10018447	scaffold15368	-	11392~13693	6793~13876
Dendrobium_GLEAN_10018455	scaffold15378	-	866~11090	311~12860
Dendrobium_GLEAN_10018461	scaffold15279	+	9865~10386	9522~22464
Dendrobium_GLEAN_10018471	scaffold15294	+	12751~19324	3827~20426
Dendrobium_GLEAN_10018476	scaffold15278	+	18001~18663	17910~19821
Dendrobium_GLEAN_10018482	scaffold15579	-	12746~13078	11417~13078
Dendrobium_GLEAN_10018483	scaffold15491	-	441~7478	142~7478
Dendrobium_GLEAN_10018487	scaffold15331	+	13447~15852	12910~15973
Dendrobium_GLEAN_10018494	scaffold15267	-	1022~17091	1022~17699
Dendrobium_GLEAN_10018524	scaffold15271	-	17541~20455	17373~20463
Dendrobium_GLEAN_10018527	scaffold14930	-	15547~19580	15324~22401
Dendrobium_GLEAN_10018529	scaffold15255	+	11193~12599	10715~13228
Dendrobium_GLEAN_10018531	scaffold15426	-	1914~16173	250~16502
Dendrobium_GLEAN_10018548	scaffold15223	-	13150~13734	1797~15178
Dendrobium_GLEAN_10018550	scaffold15238	+	10938~21772	10854~22713
Dendrobium_GLEAN_10018551	scaffold15270	-	970~4826	970~4990
Dendrobium_GLEAN_10018553	scaffold15248	-	11117~13977	11117~13988
Dendrobium_GLEAN_10018568	scaffold15215	+	6103~11906	1246~17554
Dendrobium_GLEAN_10018572	scaffold15213	-	12417~18295	3181~18315
Dendrobium_GLEAN_10018586	scaffold15251	+	15886~22521	15426~22521
Dendrobium_GLEAN_10018587	scaffold15423	-	556~996	81~6016
Dendrobium_GLEAN_10018611	scaffold15196	-	2674~4935	2674~5356
Dendrobium_GLEAN_10018615	scaffold43756	-	7299~8222	5160~11890
Dendrobium_GLEAN_10018637	scaffold15332	-	16597~17447	16395~17499
Dendrobium_GLEAN_10018646	scaffold15165	-	5983~6291	5982~14479
Dendrobium_GLEAN_10018650	scaffold15170	-	9033~22551	8906~22811
Dendrobium_GLEAN_10018652	scaffold15168	+	16221~17746	7608~17963
Dendrobium_GLEAN_10018673	scaffold15192	+	9223~18983	9186~19153
Dendrobium_GLEAN_10018676	scaffold15172	-	19580~21927	19265~22161
Dendrobium_GLEAN_10018697	scaffold43562	+	17988~20447	152~20770
Dendrobium_GLEAN_10018735	scaffold15358	+	14337~15669	14067~15669
Dendrobium_GLEAN_10018736	scaffold15143	+	688~2719	480~3104
Dendrobium_GLEAN_10018738	scaffold15143	+	3960~6439	3800~6747
Dendrobium_GLEAN_10018739	scaffold15143	-	7674~18131	7674~18289
Dendrobium_GLEAN_10018741	scaffold15142	-	8074~8925	7856~9040
Dendrobium_GLEAN_10018768	scaffold15157	+	3109~5232	3036~5499
Dendrobium_GLEAN_10018770	scaffold15157	+	15493~20000	15409~21200
Dendrobium_GLEAN_10018777	scaffold15153	-	2004~10221	2004~10416
Dendrobium_GLEAN_10018786	scaffold15118	+	17079~20949	16766~20949
Dendrobium_GLEAN_10018791	scaffold15283	-	21476~22841	21060~22979
Dendrobium_GLEAN_10018812	scaffold15087	+	7857~8258	7508~8302
Dendrobium_GLEAN_10018835	Scaffold15092	-	13169~21884	12901~21942
Dendrobium_GLEAN_10018845	scaffold15086	-	17473~18288	13919~18288
Dendrobium_GLEAN_10018846	scaffold15086	-	19321~21793	19321~21958
Dendrobium_GLEAN_10018848	scaffold15407	+	8944~21667	6997~21667
Dendrobium_GLEAN_10018852	scaffold15081	-	5165~11796	7~11916
Dendrobium_GLEAN_10018854	scaffold14740	+	11610~22984	2409~22993
Dendrobium_GLEAN_10018855	scaffold15079	-	4928~7219	4555~9105
Dendrobium_GLEAN_10018863	scaffold15454	+	16579~18785	16558~19014
Dendrobium_GLEAN_10018865	scaffold15073	+	1620~3788	1620~5254
Dendrobium_GLEAN_10018885	scaffold15232	+	5385~15981	5271~15981
Dendrobium_GLEAN_10018888	scaffold15072	-	11693~12200	9811~12332
Dendrobium_GLEAN_10018890	scaffold15227	+	7956~8642	7935~15506
Dendrobium_GLEAN_10018891	scaffold15227	+	16608~20012	16260~20861
Dendrobium_GLEAN_10018896	scaffold14920	-	492~3355	46~21942
Dendrobium_GLEAN_10018906	Scaffold15057	-	1314~20180	932~22617
Dendrobium_GLEAN_10018921	scaffold15280	+	3608~10485	3324~10489
Dendrobium_GLEAN_10018923	scaffold15280	+	15522~17476	14937~17476
Dendrobium_GLEAN_10018924	scaffold15280	-	17588~21926	17588~22055
Dendrobium_GLEAN_10018964	scaffold15034	+	6949~7611	6914~7660
Dendrobium_GLEAN_10018977	scaffold15229	-	19175~20236	18897~20266
Dendrobium_GLEAN_10018982	scaffold15119	-	19361~22632	19361~22774
Dendrobium_GLEAN_10018995	scaffold15011	+	19888~21674	1~21674
Dendrobium_GLEAN_10018997	scaffold15177	+	5865~22124	5865~22370
Dendrobium_GLEAN_10019005	scaffold15019	+	2036~9133	1797~12888
Dendrobium_GLEAN_10019006	scaffold15019	+	10575~11341	10575~12888
Dendrobium_GLEAN_10019024	scaffold15014	-	7163~22174	7163~22468
Dendrobium_GLEAN_10019048	Scaffold14990	+	7505~16700	7089~16927
Dendrobium_GLEAN_10019054	scaffold14989	+	6351~7757	3702~8713
Dendrobium_GLEAN_10019056	scaffold14989	-	10682~17324	10482~23191
Dendrobium_GLEAN_10019059	scaffold15104	-	1518~4385	1275~5783
Dendrobium_GLEAN_10019060	scaffold15104	+	10331~20777	10159~21169
Dendrobium_GLEAN_10019064	scaffold14988	-	1033~6195	875~22823
Dendrobium_GLEAN_10019074	scaffold15024	-	11178~15065	10217~15250
Dendrobium_GLEAN_10019082	scaffold14934	-	8541~10511	8423~10616
Dendrobium_GLEAN_10019084	scaffold14934	+	18273~19016	18057~19372
Dendrobium_GLEAN_10019086	Scaffold14979	-	1204~3759	885~3962
Dendrobium_GLEAN_10019117	scaffold14965	-	10396~14759	10160~14971
Dendrobium_GLEAN_10019121	scaffold14950	+	16701~19617	174~19617
Dendrobium_GLEAN_10019122	scaffold14914	-	14513~15586	6309~15707
Dendrobium_GLEAN_10019132	scaffold14953	+	10381~15194	9507~15265
Dendrobium_GLEAN_10019133	scaffold14953	+	15746~20433	9507~20590
Dendrobium_GLEAN_10019138	scaffold15132	-	6038~10976	6038~11034
Dendrobium_GLEAN_10019148	scaffold15023	+	10444~17857	9882~18172
Dendrobium_GLEAN_10019156	scaffold14964	-	4552~12928	4300~12980
Dendrobium_GLEAN_10019161	scaffold14940	-	4821~12885	4821~12981
Dendrobium_GLEAN_10019174	scaffold15190	+	14503~15727	4290~16055
Dendrobium_GLEAN_10019175	scaffold14932	-	216~7148	216~7599
Dendrobium_GLEAN_10019184	scaffold14928	+	7755~21295	7755~21562
Dendrobium_GLEAN_10019187	scaffold14924	+	14703~15141	14526~20424
Dendrobium_GLEAN_10019190	scaffold14921	-	2208~3099	1901~3159
Dendrobium_GLEAN_10019204	scaffold14907	+	11842~14676	1772~14964
Dendrobium_GLEAN_10019208	Scaffold14905	+	4763~15331	4646~18146
Dendrobium_GLEAN_10019210	Scaffold14905	-	21286~21735	16470~21831
Dendrobium_GLEAN_10019212	scaffold14993	+	10184~16828	10056~22411
Dendrobium_GLEAN_10019216	scaffold15094	+	10149~16162	8267~16238
Dendrobium_GLEAN_10019218	scaffold15094	-	20682~22766	20542~22766
Dendrobium_GLEAN_10019230	scaffold14908	+	9433~10169	9433~16966
Dendrobium_GLEAN_10019232	scaffold14917	+	13600~16735	13600~17746
Dendrobium_GLEAN_10019234	Scaffold14896	-	964~3999	670~4046
Dendrobium_GLEAN_10019236	Scaffold14896	+	16034~21665	15665~21665
Dendrobium_GLEAN_10019243	scaffold14893	-	9899~21158	9260~22532
Dendrobium_GLEAN_10019253	scaffold14889	+	2350~8913	2350~9718
Dendrobium_GLEAN_10019275	scaffold14886	+	4045~12940	3701~12974
Dendrobium_GLEAN_10019277	scaffold14892	-	1417~16055	383~16055
Dendrobium_GLEAN_10019293	scaffold14882	+	11084~14435	10695~14820
Dendrobium_GLEAN_10019303	scaffold14857	+	10906~11195	10840~11335
Dendrobium_GLEAN_10019323	scaffold14916	+	22654~22988	1510~23309
Dendrobium_GLEAN_10019325	scaffold14851	+	12424~20882	12260~23537
Dendrobium_GLEAN_10019332	scaffold15003	+	9846~10949	4279~11003
Dendrobium_GLEAN_10019338	scaffold14861	+	7279~22907	4150~22907
Dendrobium_GLEAN_10019385	scaffold14813	-	13607~20402	7532~20840
Dendrobium_GLEAN_10019387	scaffold14999	-	6868~20967	6413~21593
Dendrobium_GLEAN_10019405	scaffold14977	+	3018~5900	2832~12281
Dendrobium_GLEAN_10019413	scaffold14801	+	14760~17460	14618~17460
Dendrobium_GLEAN_10019431	scaffold14919	+	9584~23412	9498~23412
Dendrobium_GLEAN_10019432	scaffold14798	-	1114~17470	850~22789
Dendrobium_GLEAN_10019442	scaffold14794	+	3066~7968	157~8028
Dendrobium_GLEAN_10019444	scaffold14794	-	15837~17183	15527~17183
Dendrobium_GLEAN_10019445	scaffold14794	-	19058~19453	18931~19554
Dendrobium_GLEAN_10019456	scaffold14793	+	20009~23305	20009~23476
Dendrobium_GLEAN_10019460	scaffold14784	+	13497~23471	11562~23471
Dendrobium_GLEAN_10019477	Scaffold14781	+	13571~14952	12652~15375
Dendrobium_GLEAN_10019478	scaffold14657	+	305~1277	1~1794
Dendrobium_GLEAN_10019485	scaffold14774	+	13173~22189	8501~22333
Dendrobium_GLEAN_10019486	scaffold14745	-	4849~13933	107~14035
Dendrobium_GLEAN_10019496	scaffold14995	-	3310~4480	2217~4631
Dendrobium_GLEAN_10019497	scaffold14995	+	7633~15233	7633~15436
Dendrobium_GLEAN_10019498	scaffold14995	+	16601~23614	16316~23614
Dendrobium_GLEAN_10019500	scaffold14762	-	670~1071	34~4866
Dendrobium_GLEAN_10019501	scaffold14762	+	5874~7511	5635~7607
Dendrobium_GLEAN_10019502	scaffold14762	-	11236~15277	10923~23710
Dendrobium_GLEAN_10019506	scaffold14757	+	14319~14972	13989~14972
Dendrobium_GLEAN_10019516	scaffold14701	+	10688~15089	10555~15207
Dendrobium_GLEAN_10019518	scaffold14918	-	6747~17795	6546~23718
Dendrobium_GLEAN_10019531	scaffold14902	+	16646~23381	16646~23710
Dendrobium_GLEAN_10019535	scaffold14731	-	2898~10515	2898~10821
Dendrobium_GLEAN_10019536	scaffold14731	-	19068~19801	18709~19925
Dendrobium_GLEAN_10019549	scaffold14737	-	3643~18858	1982~21570
Dendrobium_GLEAN_10019562	scaffold14728	-	515~21411	1~21411
Dendrobium_GLEAN_10019573	scaffold14722	-	5319~5794	1170~6854
Dendrobium_GLEAN_10019578	scaffold14317	-	3354~4602	3047~5947
Dendrobium_GLEAN_10019600	scaffold14719	+	19277~21337	19259~21337
Dendrobium_GLEAN_10019614	scaffold14942	+	19200~21419	15211~23773
Dendrobium_GLEAN_10019616	scaffold14706	+	8950~14468	4540~14468
Dendrobium_GLEAN_10019621	scaffold14503	+	65~456	2~1329
Dendrobium_GLEAN_10019636	scaffold14960	-	11498~12382	11227~13005
Dendrobium_GLEAN_10019646	scaffold14819	-	6146~9753	5931~9914
Dendrobium_GLEAN_10019656	scaffold14691	-	2918~10269	1415~10321
Dendrobium_GLEAN_10019673	scaffold14752	+	9210~20944	1403~20944
Dendrobium_GLEAN_10019677	scaffold14670	-	256~7603	256~7735
Dendrobium_GLEAN_10019679	scaffold14670	+	12680~13777	12391~22185
Dendrobium_GLEAN_10019696	scaffold14675	+	1194~3520	934~3520
Dendrobium_GLEAN_10019699	scaffold14399	+	867~7885	751~7885
Dendrobium_GLEAN_10019714	scaffold14655	+	3776~8769	3467~8769
Dendrobium_GLEAN_10019717	scaffold14655	+	16142~18842	15886~21604
Dendrobium_GLEAN_10019732	scaffold14583	+	7689~18619	7570~21415
Dendrobium_GLEAN_10019738	scaffold14652	-	16997~17979	16997~18694
Dendrobium_GLEAN_10019746	scaffold14647	+	12656~22139	4488~22350
Dendrobium_GLEAN_10019747	scaffold14817	-	3~10472	3~10719
Dendrobium_GLEAN_10019762	scaffold14633	-	566~2065	4~2161
Dendrobium_GLEAN_10019763	scaffold14633	-	11681~23189	11458~23554
Dendrobium_GLEAN_10019795	scaffold14616	+	2456~12389	347~12462
Dendrobium_GLEAN_10019809	scaffold14614	+	2378~2908	2378~3994
Dendrobium_GLEAN_10019825	scaffold14617	-	22860~23721	22522~23721
Dendrobium_GLEAN_10019829	scaffold14718	+	8105~14973	1528~14973
Dendrobium_GLEAN_10019831	scaffold14677	-	3470~4665	3470~6856
Dendrobium_GLEAN_10019832	scaffold14677	+	14061~14966	13935~15815
Dendrobium_GLEAN_10019835	scaffold14597	-	9477~10359	9301~10612
Dendrobium_GLEAN_10019841	scaffold14592	+	18256~21877	18256~22327
Dendrobium_GLEAN_10019848	scaffold14580	-	20508~21308	19303~21308
Dendrobium_GLEAN_10019851	scaffold14755	+	9643~21772	9559~21772
Dendrobium_GLEAN_10019860	scaffold14581	-	14731~18246	6097~18246
Dendrobium_GLEAN_10019865	scaffold14407	+	8535~9281	8503~15290
Dendrobium_GLEAN_10019869	scaffold14629	+	13459~18569	13459~18790
Dendrobium_GLEAN_10019885	scaffold14545	+	16161~17575	14989~18856
Dendrobium_GLEAN_10019896	scaffold14620	+	16710~17696	16224~18552
Dendrobium_GLEAN_10019898	scaffold14566	-	280~1120	12~1281
Dendrobium_GLEAN_10019901	scaffold14566	-	11089~11493	10987~12158
Dendrobium_GLEAN_10019906	scaffold14744	-	7801~16801	7356~17313
Dendrobium_GLEAN_10019932	scaffold14594	+	4746~6893	4746~9259
Dendrobium_GLEAN_10019955	scaffold14664	-	1468~6496	1468~6571
Dendrobium_GLEAN_10019957	scaffold14664	-	7046~21095	1468~21276
Dendrobium_GLEAN_10019961	scaffold14666	-	10748~22145	10748~22700
Dendrobium_GLEAN_10019985	scaffold14526	+	1961~13913	1827~13913
Dendrobium_GLEAN_10019997	scaffold14516	-	646~2489	505~2530
Dendrobium_GLEAN_10019998	scaffold14516	-	11047~13338	10757~14334
Dendrobium_GLEAN_10020000	scaffold14609	+	5409~15212	805~18716
Dendrobium_GLEAN_10020007	Scaffold14509	+	1929~4553	1599~21494
Dendrobium_GLEAN_10020013	scaffold14734	-	12072~21312	12072~21319
Dendrobium_GLEAN_10020015	scaffold14557	+	3127~17465	2815~17465
Dendrobium_GLEAN_10020016	scaffold14557	-	18427~23369	18229~23541
Dendrobium_GLEAN_10020018	scaffold14515	-	9251~10501	8969~10501
Dendrobium_GLEAN_10020019	scaffold14515	-	12947~14551	50~15024
Dendrobium_GLEAN_10020026	scaffold14549	-	5378~14044	5054~14472
Dendrobium_GLEAN_10020032	scaffold14535	-	9893~15722	8867~15921
Dendrobium_GLEAN_10020040	scaffold14493	+	10044~12484	9660~12668
Dendrobium_GLEAN_10020047	scaffold14492	+	2825~10642	2145~23807
Dendrobium_GLEAN_10020073	scaffold14548	-	1076~2989	949~6812
Dendrobium_GLEAN_10020082	scaffold14624	+	1114~4041	49~4150
Dendrobium_GLEAN_10020083	scaffold14624	+	10945~23055	9801~23055
Dendrobium_GLEAN_10020085	scaffold14474	+	3268~19424	3059~19876
Dendrobium_GLEAN_10020093	scaffold14676	-	3740~10880	2383~10880
Dendrobium_GLEAN_10020101	scaffold14434	-	19523~22990	18612~22990
Dendrobium_GLEAN_10020108	scaffold14460	-	14375~20928	14141~21005
Dendrobium_GLEAN_10020119	scaffold14449	+	16214~17200	14663~17200
Dendrobium_GLEAN_10020136	scaffold14485	-	19474~21218	19474~21301
Dendrobium_GLEAN_10020153	scaffold14625	-	8014~11245	809~11245
Dendrobium_GLEAN_10020155	scaffold14625	-	13463~24092	809~24248
Dendrobium_GLEAN_10020160	scaffold14297	+	12156~18725	11258~18725
Dendrobium_GLEAN_10020165	scaffold14804	-	12496~13191	12002~13191
Dendrobium_GLEAN_10020166	scaffold14436	-	9137~12101	8472~12486
Dendrobium_GLEAN_10020173	scaffold14421	+	6378~16152	6336~16390
Dendrobium_GLEAN_10020175	scaffold14421	-	21327~24453	14521~24484
Dendrobium_GLEAN_10020180	scaffold14445	+	7113~8789	6954~9589
Dendrobium_GLEAN_10020185	scaffold14273	-	17917~19756	17777~19892
Dendrobium_GLEAN_10020186	scaffold14417	+	8580~16536	1476~16792
Dendrobium_GLEAN_10020187	scaffold14417	+	19179~21422	19098~21656
Dendrobium_GLEAN_10020202	scaffold14330	-	2289~20297	2154~20493
Dendrobium_GLEAN_10020224	scaffold14208	-	13450~14774	12976~19181
Dendrobium_GLEAN_10020246	scaffold14483	+	3258~9539	3086~9672
Dendrobium_GLEAN_10020247	scaffold14483	-	10539~19724	3213~19724
Dendrobium_GLEAN_10020250	scaffold14404	-	10707~12716	20~12716
Dendrobium_GLEAN_10020253	scaffold14393	-	14071~14703	13851~14761
Dendrobium_GLEAN_10020257	scaffold14539	-	6647~9799	2644~9939
Dendrobium_GLEAN_10020260	scaffold14539	-	22796~24142	22683~24576
Dendrobium_GLEAN_10020268	scaffold14455	+	22505~24368	11082~24368
Dendrobium_GLEAN_10020296	scaffold14506	+	1067~6301	218~21309
Dendrobium_GLEAN_10020297	scaffold14506	+	13471~21155	13471~21309
Dendrobium_GLEAN_10020302	scaffold14707	-	12248~22601	12248~22803
Dendrobium_GLEAN_10020303	scaffold14574	-	3427~13181	3339~13181
Dendrobium_GLEAN_10020318	scaffold14356	+	1773~2546	797~8237
Dendrobium_GLEAN_10020331	scaffold14495	-	1969~8898	1969~15652
Dendrobium_GLEAN_10020333	scaffold14345	-	1292~3454	1217~3525
Dendrobium_GLEAN_10020339	Scaffold14343	+	21113~21977	20987~22042
Dendrobium_GLEAN_10020342	scaffold14337	+	9566~15484	9566~15602
Dendrobium_GLEAN_10020354	Scaffold14334	+	23750~24133	23750~24272
Dendrobium_GLEAN_10020357	scaffold14335	-	7178~7978	444~15823
Dendrobium_GLEAN_10020359	scaffold14335	-	11628~12428	11628~15820
Dendrobium_GLEAN_10020363	scaffold14332	+	3948~5627	428~7961
Dendrobium_GLEAN_10020369	scaffold14331	+	982~11805	712~12462
Dendrobium_GLEAN_10020371	scaffold14331	+	20908~24444	20744~24661
Dendrobium_GLEAN_10020376	scaffold14340	-	11099~19260	8528~19260
Dendrobium_GLEAN_10020379	scaffold14459	-	5862~11237	2312~19519
Dendrobium_GLEAN_10020390	scaffold14341	+	9554~11182	9184~12306
Dendrobium_GLEAN_10020397	scaffold14401	-	67~1691	67~1996
Dendrobium_GLEAN_10020399	scaffold14401	-	11831~13414	11664~13414
Dendrobium_GLEAN_10020402	scaffold14429	+	3636~5802	3636~5962
Dendrobium_GLEAN_10020403	scaffold14429	-	6407~7125	6237~20459
Dendrobium_GLEAN_10020413	scaffold14124	-	23743~24090	18682~24206
Dendrobium_GLEAN_10020414	scaffold13977	-	2831~22851	40~23001
Dendrobium_GLEAN_10020418	scaffold14377	-	1260~3602	1093~4272
Dendrobium_GLEAN_10020425	scaffold14306	-	6775~17494	6565~18699
Dendrobium_GLEAN_10020437	scaffold14269	+	21594~24392	5140~24813
Dendrobium_GLEAN_10020438	scaffold14279	-	14077~16033	14077~20973
Dendrobium_GLEAN_10020441	scaffold14304	-	5605~8604	9~9077
Dendrobium_GLEAN_10020445	scaffold14296	+	14234~22921	9049~22921
Dendrobium_GLEAN_10020464	scaffold14654	-	14863~19631	3463~22441
Dendrobium_GLEAN_10020468	scaffold14305	+	21212~21754	21012~21889
Dendrobium_GLEAN_10020477	Scaffold14286	-	13623~16786	13623~17637
Dendrobium_GLEAN_10020480	scaffold14284	-	4592~11264	3737~18064
Dendrobium_GLEAN_10020487	scaffold14136	+	11886~23452	11225~23811
Dendrobium_GLEAN_10020488	scaffold14311	-	17190~24741	12611~24741
Dendrobium_GLEAN_10020490	Scaffold14282	+	646~23159	33~23159
Dendrobium_GLEAN_10020501	scaffold14248	+	5356~21911	5356~22630
Dendrobium_GLEAN_10020505	scaffold14222	+	14218~20583	14005~20583
Dendrobium_GLEAN_10020509	scaffold14148	+	8140~8692	7615~8692
Dendrobium_GLEAN_10020518	scaffold14358	+	17592~22223	651~22400
Dendrobium_GLEAN_10020559	scaffold14255	-	4021~14373	3557~14464
Dendrobium_GLEAN_10020566	scaffold14363	-	13837~17519	13837~17819
Dendrobium_GLEAN_10020576	scaffold14265	-	222~6723	1~7469
Dendrobium_GLEAN_10020582	scaffold14289	-	7912~21495	5947~21495
Dendrobium_GLEAN_10020587	scaffold14290	+	3157~11656	3136~11656
Dendrobium_GLEAN_10020593	scaffold14264	-	13788~24571	13788~24951
Dendrobium_GLEAN_10020598	Scaffold14235	-	2751~15069	2428~20157
Dendrobium_GLEAN_10020605	scaffold14233	-	66~9360	66~9853
Dendrobium_GLEAN_10020606	scaffold14233	+	142~9393	142~9853
Dendrobium_GLEAN_10020626	scaffold14328	-	14835~16830	12951~16996
Dendrobium_GLEAN_10020630	scaffold14528	+	2181~22933	1891~22933
Dendrobium_GLEAN_10020637	scaffold14239	+	14063~23408	13856~23408
Dendrobium_GLEAN_10020664	scaffold14180	+	3060~6618	2472~9854
Dendrobium_GLEAN_10020669	scaffold14180	+	18737~21667	18450~21667
Dendrobium_GLEAN_10020671	scaffold14224	-	6877~9183	6750~20073
Dendrobium_GLEAN_10020684	scaffold14207	-	3905~12181	2624~24906
Dendrobium_GLEAN_10020685	scaffold14207	-	13450~20723	13450~22842
Dendrobium_GLEAN_10020686	scaffold14068	-	3335~12684	3104~18925
Dendrobium_GLEAN_10020688	scaffold14082	+	714~1242	5~1242
Dendrobium_GLEAN_10020690	scaffold14082	+	18214~23341	18038~23580
Dendrobium_GLEAN_10020695	scaffold14241	-	1223~17865	1223~23266
Dendrobium_GLEAN_10020698	scaffold14196	-	18553~24752	18316~24863
Dendrobium_GLEAN_10020706	scaffold14189	+	253~707	1~9489
Dendrobium_GLEAN_10020707	scaffold14189	+	11123~13120	10920~13817
Dendrobium_GLEAN_10020708	scaffold14189	+	15877~16426	15625~16426
Dendrobium_GLEAN_10020745	scaffold14170	-	12347~23294	12347~23337
Dendrobium_GLEAN_10020746	scaffold14166	+	249~6794	249~20101
Dendrobium_GLEAN_10020751	scaffold14538	-	5819~7782	5047~7782
Dendrobium_GLEAN_10020758	scaffold14251	-	16602~21058	16423~23391
Dendrobium_GLEAN_10020763	scaffold14225	+	5581~9616	5405~20100
Dendrobium_GLEAN_10020767	scaffold14153	-	7837~10419	7759~10419
Dendrobium_GLEAN_10020783	scaffold14144	-	2498~7859	1135~8074
Dendrobium_GLEAN_10020797	scaffold14133	-	4636~21165	4636~21740
Dendrobium_GLEAN_10020803	scaffold14213	+	1270~6543	1270~15530
Dendrobium_GLEAN_10020807	scaffold14213	-	22131~23343	21258~24683
Dendrobium_GLEAN_10020808	scaffold14122	+	192~7183	192~8140
Dendrobium_GLEAN_10020809	scaffold14142	-	5430~5990	5244~6544
Dendrobium_GLEAN_10020810	scaffold14142	-	16484~24652	16258~24746
Dendrobium_GLEAN_10020817	scaffold14716	+	8428~8748	8318~8975
Dendrobium_GLEAN_10020818	scaffold14716	-	10165~10545	10165~10583
Dendrobium_GLEAN_10020822	scaffold14131	+	13851~15326	2884~15326
Dendrobium_GLEAN_10020827	scaffold14128	-	6299~21252	6299~21677
Dendrobium_GLEAN_10020832	scaffold14140	-	18226~18645	17913~19442
Dendrobium_GLEAN_10020834	scaffold14178	+	3531~6628	3531~7176
Dendrobium_GLEAN_10020835	scaffold14178	-	8261~24510	7990~24510
Dendrobium_GLEAN_10020847	scaffold14132	-	21429~22523	21429~22993
Dendrobium_GLEAN_10020853	scaffold14083	-	15077~22844	9337~23015
Dendrobium_GLEAN_10020870	scaffold14161	-	695~4215	695~4484
Dendrobium_GLEAN_10020874	scaffold14149	+	15431~25168	15431~25289
Dendrobium_GLEAN_10020875	scaffold14097	+	513~8257	513~19809
Dendrobium_GLEAN_10020883	scaffold14109	+	12420~18443	12358~21092
Dendrobium_GLEAN_10020884	scaffold14109	-	20370~21416	18898~22734
Dendrobium_GLEAN_10020885	scaffold14078	-	1221~13572	474~21859
[truncated: 14,384 more rows]
