# Supplementary material for: Identification and analysis of sucrose synthase gene family associated with polysaccharide biosynthesis in Dendrobium catenatum by transcriptomic analysis
Source: PeerJ. 2022 Apr 5;10:e13222. doi: 10.7717/peerj.13222 (PMC8992646; doi:10.7717/peerj.13222)
Supplement: Table S5 [file peerj-10-13222-s010.xls]

## Sheet: fpkm
geneID	S1-1_fpkm	S1-2_fpkm	S2-1_fpkm	S2-2_fpkm	S3-1_fpkm	S3-2_fpkm	S4-1_fpkm	S4-2_fpkm
Novel03934	0	0.182251	0.158571	0.580554	0	0	0.0490407	0.603735
Novel02303	0	0	0	0	0	0	0	0
Dendrobium_GLEAN_10024123	153.719	109.875	99.5763	111.011	109.785	180.263	62.0869	84.9177
Dendrobium_GLEAN_10078531	0	0	0	0.0759768	0	0	0	0.442459
Dendrobium_GLEAN_10017327	0	0	0	0	0	0	0	0
Dendrobium_GLEAN_10065269	0	0	0.180719	0.073516	0	0.0640617	0	0
Dendrobium_GLEAN_10127752	1.74823	1.01591	4.86152	1.16861	2.87761	4.22998	16.7664	1.79487
PEQU_34632-D1	6.57813	8.71826	8.31485	8.54515	17.7871	6.2052	5.59417	10.6636
Dendrobium_GLEAN_10078249	27.2882	13.1858	0.500984	15.9574	0.711695	27.0114	7.80887	16.3784
Dendrobium_GLEAN_10124280	10.6701	9.1801	8.16987	9.58053	9.40158	11.0666	7.67883	8.2485
Novel05526	1.70397	0	0	0	0	3.58513	0	0
Dendrobium_GLEAN_10025735	35.7817	58.2347	41.0618	48.817	31.1392	24.7178	5.24832	32.1519
Dendrobium_GLEAN_10133100	15.9705	14.4677	19.0558	14.4418	21.5631	19.5554	11.5535	10.6307
Dendrobium_GLEAN_10092069	32.1773	28.055	27.8069	33.406	28.4203	36.4341	32.4447	34.3232
Novel05572	2.78796	7.0205	4.46376	8.31466	5.56246	3.99745	1.16252	6.44027
Dendrobium_GLEAN_10046128	10.255	5.67551	6.56245	8.40522	6.69195	12.5066	7.55555	2.70471
Dendrobium_GLEAN_10099259	35.3142	30.5615	51.7413	34.4425	92.5611	51.2979	76.714	86.5961
Dendrobium_GLEAN_10091528	42.457	42.67	40.4002	41.4882	40.9294	34.0533	33.7157	27.3291
Dendrobium_GLEAN_10044875	18.9794	34.5038	24.1214	34.757	26.3829	36.2819	31.6237	29.6147
Novel05642	0	0	1.8599	0	2.49152	0	0	0
Dendrobium_GLEAN_10052843	0.108659	0.157857	0	0.0558722	0.0541983	0.146061	0	0.0929649
Novel04931	3.81573	2.39127	4.66552	2.00051	5.29926	2.61486	3.82171	5.05694
Dendrobium_GLEAN_10028606	0	0.563776	0	0.798174	0.0645218	0	0	0.44269
Dendrobium_GLEAN_10097932	0	0	0	0	0	0	0	0
Dendrobium_GLEAN_10111155	0	0	0	0	0	0	0	0
Dendrobium_GLEAN_10002788	1.02857	1.41126	1.95019	0.881478	2.56521	2.30436	6.43338	5.57338
Dendrobium_GLEAN_10043776	0.345653	2.14811	0.679638	3.31769	0.574696	0.232315	1.18607	3.58571
Dendrobium_GLEAN_10030505	10.3	12.4245	9.60512	10.8482	9.36543	10.4745	12.7464	8.93642
Dendrobium_GLEAN_10092795	0.252244	0.57004	0.991947	0.345875	0.251635	0.150698	0	0
Dendrobium_GLEAN_10096010	0	0.300021	0	0.159285	0	0	0	0
Dendrobium_GLEAN_10133531	0	0	0	0	0	0	0.184759	0
Dendrobium_GLEAN_10059132	24.265	27.3829	25.4681	28.6302	24.6386	20.4829	23.0365	24.6528
Dendrobium_GLEAN_10018407	4.51053	8.04449	7.69454	8.42869	7.95668	4.83077	13.5326	11.7184
Novel04965	1.07757	0.00784699	1.65906	0.108317	1.59225	1.35773	2.55069	0.0277274
Dendrobium_GLEAN_10009726	0.973225	0	5.85796	0	1.24827	0.373778	1.44934	3.44958
Dendrobium_GLEAN_10043915	13.2987	10.1741	2.63682	16.8943	1.89523	13.2194	7.45584	1.43419
Dendrobium_GLEAN_10052322	1.85115	1.24122	1.67991	2.05015	1.84668	3.06256	0.890643	1.58378
Dendrobium_GLEAN_10039204	80.2051	42.6081	47.5378	48.9355	42.2448	74.6911	39.309	79.7588
Dendrobium_GLEAN_10046585	59.247	27.5577	38.3633	13.7829	78.9467	67.0105	204.968	162.262
Dendrobium_GLEAN_10033218	0.954437	2.13765	4.02141	2.20846	3.5705	0.908768	0.746214	1.17384
Dendrobium_GLEAN_10082102	34.1818	30.7903	33.116	39.6812	32.593	36.2319	37.95	29.2448
Dendrobium_GLEAN_10041732	0	0	0	0	0	0	0	0
Dendrobium_GLEAN_10027120	8.59621	13.2759	10.4742	14.0967	15.1809	12.3879	18.2855	13.2185
Dendrobium_GLEAN_10020904	10.1783	23.9588	27.148	23.5741	28.9601	11.4213	9.68769	15.2204
Dendrobium_GLEAN_10106664	3.99061	3.01786	6.72559	1.57411	7.79835	7.54421	2.84932	3.60131
Dendrobium_GLEAN_10124659	0.914669	2.11839	0.167559	6.54359	0.198361	0.142552	0.124369	9.73096
Dendrobium_GLEAN_10061660	0.458085	1.61332	0.666757	1.41328	1.16322	0.447828	0.390706	1.63895
Dendrobium_GLEAN_10142844	0	0	0	0	0	0	0	0
Dendrobium_GLEAN_10045806	65.862	52.8774	3.6057	48.0141	4.32256	48.5861	16.374	33.5037
Dendrobium_GLEAN_10042014	12.2182	15.2093	4.51863	10.3988	1.37553	1.3043	0.798552	6.32454
Dendrobium_GLEAN_10002484	3.75018	2.11873	5.92535	2.8925	4.20876	4.48092	7.49296	7.88762
Dendrobium_GLEAN_10105607	0	0	0	0	0	0	0	0
Dendrobium_GLEAN_10085565	0	0	0	0	0	0	0	0
Dendrobium_GLEAN_10078835	3.57448	2.87801	3.19359	2.65733	2.87846	2.74012	2.51407	2.39498
Dendrobium_GLEAN_10126458	0.294663	0.175622	0.0573012	0.13986	0.180893	0.142186	0.354428	1.08598
Dendrobium_GLEAN_10072570	3.26605	2.42185	3.09625	2.51909	2.03635	3.33843	6.80938	3.18727
Dendrobium_GLEAN_10139940	0	0.513036	0.743961	0.544754	1.05687	0	0.736264	0.302136
Dendrobium_GLEAN_10107680	0	0	0	0	0	0	0	0
Dendrobium_GLEAN_10131309	0	0	0	0	0	0	0	0
Novel03800	0.20958	0.405963	0.309064	0.107765	0.784026	0.657346	0.109238	0
Novel04855	4.36234	3.31965	4.20119	3.20443	4.3518	7.53931	6.49645	2.13272
Dendrobium_GLEAN_10116076	0.876363	0.188616	0.0273515	0.066759	0.129518	0	0.947399	0.916405
Dendrobium_GLEAN_10009752	26.8793	21.2404	33.3598	25.5606	38.4825	33.1583	24.2686	31.6569
Novel01788	0	0	0	0	0	0	0	0
Dendrobium_GLEAN_10096971	3.8744	2.03	2.46203	1.28459	2.70342	4.42064	4.76718	5.05371
Dendrobium_GLEAN_10109388	21.397	24.197	18.0049	20.113	14.5564	19.1747	10.3857	14.9757
Dendrobium_GLEAN_10119807	0	0	0	0	0	0	0	0
Dendrobium_GLEAN_10121202	10.4919	15.3167	18.6314	19.6322	31.1444	15.6857	14.6719	18.0406
Dendrobium_GLEAN_10075183	1.48571	0.830156	11.4604	0.705183	7.3536	13.1092	2.56144	0.928897
Dendrobium_GLEAN_10001778	0	0	0	0	0	0	0	0
Dendrobium_GLEAN_10104509	2.0972	1.70357	0.969144	2.01761	1.61972	2.06127	2.25675	1.85217
Novel03500	9.49485	0	0	0	0	12.8377	0	0
Dendrobium_GLEAN_10066404	27.34	80.817	3.7198	36.3169	0.568208	1.53128	0.296881	25.9496
Dendrobium_GLEAN_10124783	3.53142	2.063	1.41707	1.15292	1.67757	5.57581	1.05181	2.11016
Dendrobium_GLEAN_10057234	0	0	0	0	0	0	0	0
Dendrobium_GLEAN_10145845	0	0	0	0	0	0	0	0
Dendrobium_GLEAN_10022046	0	0	0	0	0	0	0	0
Dendrobium_GLEAN_10075673	0	0	0	0	0	0	0	0
Dendrobium_GLEAN_10124803	9.5825	9.6106	5.24666	11.5054	3.44525	10.1565	5.882	8.69786
Dendrobium_GLEAN_10031932	25.4481	14.5272	16.1984	17.1101	16.4523	30.7656	30.0578	26.1644
Novel01991	0.0555837	6.67539	5.19914	7.31673	5.65584	0.0498109	0	1.33155
Dendrobium_GLEAN_10120991	1.33766	0	1.46538	0.68782	0.533771	0.239746	5.57776	1.03001
Dendrobium_GLEAN_10076219	0.980949	1.22717	1.54992	1.02982	0.835871	0.51279	0.10652	2.85001
Dendrobium_GLEAN_10097301	8.44177	8.01314	8.16231	8.85441	11.2397	11.3927	6.13554	5.23702
Dendrobium_GLEAN_10022024	0	0	0	0	0	0	0	0.268168
Dendrobium_GLEAN_10038538	0.569583	0.413739	0.599968	0.0732196	1.06539	0.0638034	0	0.0609145
Dendrobium_GLEAN_10075026	22.8806	13.5385	19.343	4.99357	10.9356	20.768	10.6605	18.0652
Dendrobium_GLEAN_10045545	0.14473	0	0.121961	0.14884	0	0	0.905243	0.247652
Dendrobium_GLEAN_10096743	0	0	0	0	0	0	0	0.268168
Dendrobium_GLEAN_10139681	0	0.135724	0	0	0	0	0	0.959162
Novel05850	7.34352	8.72446	8.16844	8.05551	10.9398	5.26467	3.67452	5.94778
Dendrobium_GLEAN_10014778	36.9341	24.7575	41.8529	48.6447	32.2878	28.3076	8.4434	33.2904
Dendrobium_GLEAN_10003027	8.67089	5.11509	9.56521	7.62006	10.144	9.32441	7.39551	6.94643
Novel01067	24.9116	18.9572	35.2372	16.3285	36.3213	36.3076	22.5445	34.6637
Dendrobium_GLEAN_10047844	34.3194	32.5164	15.8223	26.0868	19.8473	18.0519	18.277	22.6602
Dendrobium_GLEAN_10066878	4.1797	1.90013	4.45657	1.05266	4.33979	4.73933	3.73467	0
Dendrobium_GLEAN_10005371	0	0.14251	0	0	0	0	0	0
Dendrobium_GLEAN_10069088	0	0	0	0	0	0	0	0
Dendrobium_GLEAN_10114127	1.3628	0	0	0	0	2.07083	0.0617672	4.2076
Dendrobium_GLEAN_10058724	18.3656	23.91	12.9504	23.6508	15.0049	22.0744	16.8727	14.5939
Dendrobium_GLEAN_10079655	35.4981	47.3252	42.7261	49.5574	83.1182	29.5038	39.4656	60.8731
Dendrobium_GLEAN_10084424	3.09692	3.26803	10.1662	4.72975	6.50167	4.72212	9.75743	9.13526
Dendrobium_GLEAN_10072375	0.829837	0	0	0.0948222	0	0.0826279	0	0
Dendrobium_GLEAN_10113234	1.2424	3.64631	6.3768	3.29098	7.62416	2.19299	4.27787	4.70276
Dendrobium_GLEAN_10010666	6.68569	15.4409	7.94521	15.6903	7.52462	8.29568	2.32316	8.65341
Dendrobium_GLEAN_10053485	13.9003	0	9.70842	0	9.74416	17.2821	0	15.1068
Dendrobium_GLEAN_10066503	8.19289	5.81441	9.34414	7.77182	8.87768	11.5193	39.1693	19.941
Dendrobium_GLEAN_10123532	0	0	0	0	0	0	0	0
Dendrobium_GLEAN_10116418	0	0	0	0	0	0	0	0
Dendrobium_GLEAN_10110715	42.377	41.8572	30.8921	46.8661	31.3705	52.1414	66.965	39.4216
Dendrobium_GLEAN_10110735	0	0	0	0.0720573	0	0	0	0
Dendrobium_GLEAN_10079723	146.939	142.51	190.266	194.212	274.34	283.909	368.661	277.739
Dendrobium_GLEAN_10073241	1.44467	1.55466	0.135266	1.98092	0.320263	0	0	0.137335
Dendrobium_GLEAN_10104158	15.7909	1.94648	1.51211	2.36207	1.93329	15.6946	8.67954	2.02652
Dendrobium_GLEAN_10066776	36.6644	40.7411	33.9596	29.8012	26.6289	35.2765	22.4128	24.082
PEQU_08742-D1	42.6606	173.009	48.9819	46.1251	42.9432	42.0413	11.6889	21.0613
Novel00696	0	0	0	0	0	0	9.04184	0.795095
Dendrobium_GLEAN_10133336	0.205315	0.795405	0.519042	0	0.819277	0.735965	0.107015	1.58094
Dendrobium_GLEAN_10039446	0	0	0	0	0	0	0	0
Dendrobium_GLEAN_10106743	10.6965	9.29331	14.3821	13.6289	13.1422	14.5898	6.43617	26.2434
Dendrobium_GLEAN_10026335	0	0.226506	0.295613	0.481019	0.116652	0.209579	3.53504	0.20009
Dendrobium_GLEAN_10095069	110.09	98.4711	123.774	89.1031	125.718	134.866	90.8345	69.3508
Dendrobium_GLEAN_10023275	54.3226	47.7263	52.8364	45.1645	56.8425	67.8139	53.8581	39.848
Dendrobium_GLEAN_10042865	12.5009	15.2689	15.6294	23.0414	36.191	19.0145	5.8004	7.64861
Dendrobium_GLEAN_10115879	9.958	9.73566	14.4509	7.87899	14.0653	9.41298	9.69389	8.58414
Dendrobium_GLEAN_10075375	52.5509	134.231	97.4234	159.247	68.6404	46.4651	50.5451	89.8015
Dendrobium_GLEAN_10031718	1.71909	2.59622	2.03791	1.7679	1.308	2.27165	1.88318	2.96652
Dendrobium_GLEAN_10091405	0	0	0	0	0	0	0	0
Novel01070	24.6669	35.23	26.4377	28.056	21.2054	24.5498	27.0174	23.0492
Dendrobium_GLEAN_10067571	21.3885	21.6466	10.7299	29.2355	9.51717	13.4101	9.18326	18.1018
Dendrobium_GLEAN_10094293	4.41427	8.07557	4.61531	8.36466	5.25987	7.28895	8.43636	5.66505
Dendrobium_GLEAN_10142147	0	0	0	0	0	0	0	0
Dendrobium_GLEAN_10020333	56.2026	55.2157	28.0079	57.6798	27.7456	65.4648	61.9569	66.6477
Dendrobium_GLEAN_10125164	0	0	0	0	0	0	0	0
Novel02568	0	0	2.0967	0	2.61277	0	0	0
Novel05432	23.8909	34.7082	35.3141	36.4512	38.9732	39.2218	80.227	31.3306
Dendrobium_GLEAN_10128951	76.1292	66.4316	58.3151	67.6752	58.1954	90.2534	50.0518	50.5497
Dendrobium_GLEAN_10137888	28.6282	34.5262	38.0559	38.0046	36.5325	35.6227	29.5583	37.754
Dendrobium_GLEAN_10094803	4.04198	8.5506	13.6542	11.0482	1.5563	1.30272	0.887066	6.58268
Dendrobium_GLEAN_10051470	4.57328	7.18661	0.638045	4.9523	0.392775	0.325693	0.0631445	2.3321
Novel04962	0	0.226756	0.14797	0.361163	0	0	0.0610164	1.00156
Dendrobium_GLEAN_10086288	26.7318	31.7497	10.9075	28.576	15.9302	36.8789	66.2931	96.9002
Dendrobium_GLEAN_10087444	10.7904	8.90688	8.47288	8.57482	7.95096	12.0872	7.66942	17.1001
Novel04420	34.1211	48.7616	24.8322	35.1513	25.6481	42.1775	36.6889	75.2788
Dendrobium_GLEAN_10005264	0	0.0119339	0	0.0126716	0	0	0	0
Novel05576	156.014	176.783	148.959	142.592	130.117	155.652	218.685	126.615
Dendrobium_GLEAN_10002487	4.12605	0.411369	17.4869	1.4976	15.1327	4.29566	0.822289	2.6995
Dendrobium_GLEAN_10109983	0.359301	0.720836	0.086507	0.554255	0.10241	0.114995	0.0802614	1.01005
Dendrobium_GLEAN_10040026	31.04	42.8209	57.3322	42.0815	50.0474	52.3046	80.2002	58.8686
Dendrobium_GLEAN_10037204	18.2341	15.3128	23.7289	22.7871	21.4136	20.0635	20.3315	16.7853
Dendrobium_GLEAN_10037744	14.8395	9.8241	17.7284	16.2267	29.0451	23.9032	25.456	42.1062
Dendrobium_GLEAN_10093183	20.6941	40.0852	44.6971	39.7307	44.177	24.8109	31.3649	34.9269
Dendrobium_GLEAN_10118959	25.1017	36.6058	41.8226	36.1206	42.5603	36.6073	41.191	55.2011
Dendrobium_GLEAN_10051178	19.8801	23.2117	29.134	24.5596	30.9414	26.6377	26.8816	29.4891
Dendrobium_GLEAN_10080895	92.4035	78.3487	86.6132	101.525	83.739	114.756	90.1512	45.8513
Dendrobium_GLEAN_10037640	9.64769	7.40465	4.06494	7.48802	4.81219	11.4188	12.2394	8.25423
Dendrobium_GLEAN_10120249	6.84212	6.76923	5.95168	6.43112	6.89899	11.1422	3.9881	3.7767
Dendrobium_GLEAN_10026893	49.8104	52.0426	54.5571	57.6139	62.4117	51.7674	80.4437	80.2899
Dendrobium_GLEAN_10120906	0	0	0	0	0	0	0	0
Dendrobium_GLEAN_10099961	16.6148	9.85695	21.7505	22.2567	11.743	28.1302	19.3014	29.7415
Dendrobium_GLEAN_10051567	74.4883	68.9616	66.3682	77.7013	51.6963	75.6572	104.704	84.317
Novel00539	0	0.957668	0.178551	1.01687	0.0704578	0.0316465	0	0
Dendrobium_GLEAN_10029489	0.0723651	0.210261	0.182941	0.14884	0.288761	0	0.0754369	0.247652
Dendrobium_GLEAN_10074990	1.12555	2.79342	1.24487	0.795789	2.31584	1.13473	3.29999	11.0141
Dendrobium_GLEAN_10125325	0.274178	0.212437	0.785548	0.394749	0.547032	0.589686	1.60057	0.140747
Dendrobium_GLEAN_10029615	54.0254	77.3383	73.5077	71.2787	78.0819	62.1122	72.8023	105.973
Dendrobium_GLEAN_10019060	1.92928	2.68095	1.69644	2.19972	1.29703	0.939623	0.786981	1.68651
Dendrobium_GLEAN_10085192	0.159073	2.92723	4.5576	5.23487	8.09312	0.285104	6.63301	8.98242
Dendrobium_GLEAN_10055964	5.82855	4.64887	4.76713	5.46517	2.90724	5.53046	2.50187	6.01339
Dendrobium_GLEAN_10025901	11.7506	3.71306	22.8638	3.75029	23.6621	14.1334	7.96049	1.80002
Dendrobium_GLEAN_10122171	21.345	34.7436	35.7854	30.8004	26.6446	18.7275	7.92183	15.7761
Dendrobium_GLEAN_10114970	32.4651	31.6815	25.8756	33.6763	29.1235	35.9018	28.3799	29.5516
Novel00708	212.906	198.835	161.274	188.899	157.142	188.466	129.588	189.774
Dendrobium_GLEAN_10037652	24.171	51.9385	12.9805	27.9328	9.6859	8.51739	9.43819	15.1769
Dendrobium_GLEAN_10143755	10.3908	8.23391	12.032	7.54734	8.29981	14.9116	3.67375	5.31536
Dendrobium_GLEAN_10026080	0.0503051	0.0487214	0	0.0517335	0	0.0450805	0.262202	0.0860786
Novel03645	0.125643	1.19254	0.719962	1.75727	0.576564	0.0225189	4.08648	3.50438
Dendrobium_GLEAN_10058195	12.993	18.8436	38.2929	20.8993	13.3604	8.89685	7.08481	17.5581
Dendrobium_GLEAN_10129352	0	0	0	0	0	0	0	0
Novel00218	402.111	108.96	79.1588	73.0581	132.726	156.828	30.7064	152.162
Dendrobium_GLEAN_10136609	0	0	0	0	0	0	0	0
Dendrobium_GLEAN_10059595	8.11272	14.328	1.00535	6.99346	3.92755	10.2637	1.74117	62.4687
Dendrobium_GLEAN_10082937	41.9787	70.9644	34.7612	34.7413	29.1154	33.1567	283.486	239.546
Dendrobium_GLEAN_10103158	0	0	0	0	0	0	0	0.563687
Dendrobium_GLEAN_10086865	8.07181	9.64997	7.54589	9.27378	4.71816	5.48163	4.73313	7.33759
Dendrobium_GLEAN_10033455	0	0	0	0	0	0	0	0
Dendrobium_GLEAN_10065658	4.96331	2.8502	13.8428	3.16192	0.788707	0.708504	0.778389	3.26938
Dendrobium_GLEAN_10047251	0	0	0	0	0	0	0	0
PEQU_15013-D2	10.6147	47.1519	26.1461	51.7463	31.9707	17.2867	11.9164	6.37455
Dendrobium_GLEAN_10107025	0	0.114773	0	0.243738	0	0.106196	0.123534	0.202776
Dendrobium_GLEAN_10037882	11.2734	7.49822	11.1022	9.91731	13.1431	14.2409	30.4417	6.27513
Novel03491	21.4233	19.1856	21.1441	20.2208	24.7383	22.3542	15.9082	12.9308
Dendrobium_GLEAN_10074777	3.2059	7.7863	4.53026	6.44169	3.59177	2.96133	4.4217	4.30417
Dendrobium_GLEAN_10007212	0.39238	0.665047	1.3226	0.504401	1.1743	0.527442	4.90843	0.335707
Novel02191	11.4632	11.371	16.3593	13.2148	15.5856	12.758	32.1875	21.1179
Dendrobium_GLEAN_10078120	0	0	0	0	0	0	0	0
Dendrobium_GLEAN_10129518	1.04549	0.773492	0.489448	1.10504	0.492509	0.87184	1.28665	1.67715
Dendrobium_GLEAN_10029749	67.8032	171.468	306.115	267.777	175.675	37.7648	145.535	382.907
Dendrobium_GLEAN_10020962	60.2043	108.891	24.9182	106.435	13.4761	8.38823	2.43943	15.4708
Dendrobium_GLEAN_10014670	17.3974	94.9369	45.13	90.2582	74.2786	23.0368	50.8889	80.7547
Dendrobium_GLEAN_10046777	6.98071	5.27721	8.33129	2.61495	35.607	19.5455	60.9163	136.353
Dendrobium_GLEAN_10099830	8.26978	9.36237	7.25126	8.79191	5.01677	6.30927	4.6599	6.11921
Dendrobium_GLEAN_10085946	0	0	0	0	0	0	0	0
Dendrobium_GLEAN_10139512	5.64046	7.18488	7.07796	5.67452	6.85006	6.15349	1.5978	3.0948
Dendrobium_GLEAN_10061555	0	0.119589	0.156076	0.0634911	0.061589	0	0.128718	0.052821
Dendrobium_GLEAN_10014416	5.7222	1.10841	0.826623	1.5132	0.326193	0	0.170432	0
Novel03325	0.0897818	11.6085	2.08057	10.2949	0.223912	0.0804572	1.16991	4.26319
Dendrobium_GLEAN_10073358	0.211146	0.562372	0.489301	1.00428	0.289625	0.11826	1.10054	0.654854
Dendrobium_GLEAN_10067868	27.4804	26.6153	27.1388	36.0612	26.9178	36.438	33.3134	28.0859
Dendrobium_GLEAN_10074135	0.543295	0	0	0.13968	0	0	0	1.39447
Novel03236	1.25695	1.50723	3.5811	2.40061	2.74666	2.09189	0.187186	3.17499
Dendrobium_GLEAN_10089261	3.97629	15.1375	5.62325	13.5834	6.06785	3.84556	4.02196	3.4525
Dendrobium_GLEAN_10045569	0.269574	0.195815	0.170373	0.138614	0.0672307	0.120788	0.0702542	0.115319
Dendrobium_GLEAN_10039150	0	0	0.0679416	0	0	0.0722523	0	0
Dendrobium_GLEAN_10141352	0.787849	1.12213	0.39053	1.33448	0.277393	0.249185	1.20778	1.50672
Dendrobium_GLEAN_10041268	0.690384	0.526814	0.317329	0.215148	0.375664	0.54369	1.0032	0.340082
Dendrobium_GLEAN_10064274	4.34551	0	0.0463527	0	0	2.85903	0	0
Dendrobium_GLEAN_10058363	0	0	0	0	0.0366968	0	0	0
Dendrobium_GLEAN_10051173	0.304433	0.147424	2.18057	0.156538	1.51849	0.272815	1.90413	2.73485
Dendrobium_GLEAN_10100263	5.66219	4.76236	3.89245	4.67369	1.6351	3.00441	4.34924	3.5058
Dendrobium_GLEAN_10068014	25.7425	35.2964	29.057	37.02	27.6671	28.2634	36.4414	42.5228
Dendrobium_GLEAN_10011674	0	0	0	0	0	0	0	0
Dendrobium_GLEAN_10091649	0	0.24331	0	0.0738148	0	0	0.0748236	0.0307049
Dendrobium_GLEAN_10105324	0.205315	1.19311	1.29761	0.739007	1.63855	0.735965	0.107015	0.263491
Dendrobium_GLEAN_10008210	0	0.158345	0.13777	0.168134	0.97858	0	0.170432	0.279756
Dendrobium_GLEAN_10112102	0	0	0	0	0	0	0	0.0891257
Dendrobium_GLEAN_10066129	6.16597	8.3244	5.66827	9.70372	6.05788	8.37209	0.486947	7.35358
Dendrobium_GLEAN_10145495	61.777	64.8697	71.9354	54.5692	75.3279	65.5418	100.832	58.1631
Novel02065	4.28724	8.02773	6.98467	4.80089	5.55996	5.16532	7.05145	5.46127
Dendrobium_GLEAN_10002904	0.321038	0	0.090177	0	0.320263	0	0.22311	0.183113
Dendrobium_GLEAN_10021319	2.88023	2.18313	2.005	1.80297	2.9982	1.79555	3.52467	3.85706
Novel04152	44.054	52.7216	93.3128	43.7993	105.952	87.664	62.4345	102.483
Novel05136	0.281388	0.136265	0	0.144689	0	1.32386	0.293332	3.31026
Dendrobium_GLEAN_10143474	17.0801	27.4402	4.40865	14.6573	3.9527	4.87797	17.0031	20.8336
Dendrobium_GLEAN_10027789	33.3523	55.1502	52.0974	47.586	73.1787	37.9501	29.0815	39.0157
Dendrobium_GLEAN_10012258	90.0822	55.0184	26.206	58.5264	15.6841	11.8287	2.16125	80.0572
Dendrobium_GLEAN_10101196	20.5999	15.7599	10.503	7.29899	2.59036	1.5513	1.98503	12.2928
Dendrobium_GLEAN_10019677	22.5461	10.7225	25.7407	10.1804	17.816	20.7839	13.8155	12.5141
Dendrobium_GLEAN_10098270	37.4986	14.0747	50.8245	12.5424	49.7563	43.1469	41.3991	43.14
Dendrobium_GLEAN_10014049	1.44467	6.06316	3.38164	7.42846	5.92486	5.46621	7.36264	6.72939
Dendrobium_GLEAN_10093804	9.90959	15.8797	13.3103	13.8041	14.499	15.2043	23.3526	12.255
Dendrobium_GLEAN_10142650	6.41016	3.89433	4.6651	2.87659	3.77868	4.69997	6.56077	6.93018
Dendrobium_GLEAN_10076702	20.9513	34.33	17.5441	27.6442	14.3282	41.5655	5.49451	103.493
Dendrobium_GLEAN_10048013	52.8692	42.2093	44.3796	45.6585	35.1271	26.9818	6.171	33.7938
Dendrobium_GLEAN_10113318	210.967	329.904	255.597	304.018	348.83	237.04	422.921	318.068
Dendrobium_GLEAN_10138868	200.342	164.969	194.113	213.089	237.951	269.107	292.49	248.969
Novel02296	3.69229	8.26433	23.3233	21.6167	26.2767	17.0391	6.33422	4.86286
Dendrobium_GLEAN_10065333	11.1145	12.2915	13.3846	5.91771	17.8504	11.6202	21.8579	4.14763
Dendrobium_GLEAN_10138552	1.34673	5.21732	2.14362	3.84713	2.23912	2.68191	6.08354	9.85783
Dendrobium_GLEAN_10125626	65.307	55.9889	58.4977	49.6663	64.908	63.7988	88.2509	55.8745
Dendrobium_GLEAN_10065921	0.787259	0.4357	0.805562	0.578295	0.617067	0	9.96536	0.769773
Dendrobium_GLEAN_10141192	2.04297	1.60177	1.31167	1.95091	1.26164	1.74361	1.01414	1.78951
Dendrobium_GLEAN_10137028	0	0.0642903	0.0559369	0.273059	0.198659	0	0	0
Dendrobium_GLEAN_10023954	3.64816	7.77328	3.935	7.20335	4.07607	4.70774	7.60604	7.86552
Dendrobium_GLEAN_10111618	0.136877	0.265135	0.115343	0	0.273092	0.367983	2.1403	0.234214
Dendrobium_GLEAN_10136957	0	0	0	0	0	0	0	0
Dendrobium_GLEAN_10040008	12.4558	13.9196	12.457	12.6687	7.1004	5.76506	0.856122	1.6395
Novel04153	133.877	152.552	86.1087	126.876	82.8782	107.517	122.852	140.881
Dendrobium_GLEAN_10024371	0	0	0	0	0	0	0	0
Dendrobium_GLEAN_10099041	0	0	0	0	0	0	0	0
Dendrobium_GLEAN_10032420	0	0	0	0	0	0	0	0
Dendrobium_GLEAN_10111889	26.3513	22.636	37.126	25.2912	35.8623	40.8165	43.1015	23.9661
Dendrobium_GLEAN_10011613	0	0	0	0	0	0	0	0
Dendrobium_GLEAN_10090796	2.15895	2.76308	2.72894	2.61672	3.69211	2.76389	4.74231	3.49633
PEQU_22030-D1	15.6992	18.26	18.515	18.5313	21.9548	19.9171	82.0927	18.1158
Dendrobium_GLEAN_10112081	200.978	257.355	231.763	237.496	371.23	265.092	207.464	240.599
Dendrobium_GLEAN_10034303	28.0201	37.907	32.5694	39.4729	34.7852	33.3205	43.1188	38.1666
Dendrobium_GLEAN_10118378	9.8672	14.2845	39.7362	18.5857	41.8602	20.7564	84.887	24.9707
Dendrobium_GLEAN_10089616	13.5472	7.07636	26.2952	7.98346	35.5326	15.8232	11.7421	16.4091
Dendrobium_GLEAN_10060083	0.21533	0	0.207376	0.0316349	0.21481	0.0826999	0.192404	0
Dendrobium_GLEAN_10048309	0	0	0	0	0	0	0	0
Dendrobium_GLEAN_10084519	3.65319	8.0985	7.21727	7.17989	6.96479	3.85578	9.68992	7.88332
Dendrobium_GLEAN_10132902	13.6046	14.1576	14.2694	15.1817	14.5825	10.6353	7.84544	9.53462
Dendrobium_GLEAN_10074614	0	0	0	0	0.16937	0	0	0.435773
Dendrobium_GLEAN_10090331	16.0519	17.7231	19.5323	20.6456	20.5822	22.3827	22.5788	21.882
Dendrobium_GLEAN_10044631	4.85085	7.75863	6.70382	7.21207	5.724	4.02412	7.97524	9.1542
Dendrobium_GLEAN_10059503	0.121773	0.0589697	0.0513076	0	0.121479	0	0	0
Novel04081	0.383405	0.772376	0.529862	0.583552	0.458975	0.329842	0.127898	0.11809
Dendrobium_GLEAN_10098205	0.882854	2.70769	1.61191	2.26981	1.1743	0.659302	2.30083	3.27314
Dendrobium_GLEAN_10134908	74.2381	86.8118	75.6421	84.4413	81.3909	96.0697	123.225	119.552
Dendrobium_GLEAN_10006863	1.03655	0.31156	0.542157	0.845434	0.534852	1.02499	0.260822	0.55045
Dendrobium_GLEAN_10113484	0	2.12055	1.72599	1.16214	1.97282	0	3.46044	0
Dendrobium_GLEAN_10081534	23.9748	10.198	24.0251	11.9946	20.5233	21.3396	36.6444	29.5206
Dendrobium_GLEAN_10112048	0	0	0	0	0	0	0	0
Dendrobium_GLEAN_10061553	0.073879	0	0	0	0	0	0	0
Dendrobium_GLEAN_10024334	2.33697	5.7004	2.40693	5.38523	0.64759	0.853214	1.39854	2.03646
Dendrobium_GLEAN_10043228	11.2659	11.3309	4.10776	11.8086	6.15965	17.2794	10.8407	3.42915
Dendrobium_GLEAN_10046154	1.16705	0.8582	0.892388	1.77806	0.905516	0.213043	0.0675885	1.42377
Dendrobium_GLEAN_10101913	0.328722	0.272892	0.197862	0.38635	0.234235	0.168332	0.538491	1.80799
Dendrobium_GLEAN_10133146	405.691	590.884	218.142	401.933	16.5806	6.74208	3.80137	66.1415
Dendrobium_GLEAN_10047198	1.70013	2.14059	0.736797	3.49681	0.605724	1.41473	4.53203	0.519491
Dendrobium_GLEAN_10051253	0	0	0	0	0	0	0	0
Dendrobium_GLEAN_10114562	36.1014	34.6381	36.9611	38.3409	47.7385	44.9501	35.2305	39.5952
Dendrobium_GLEAN_10033295	13.9949	6.39712	4.51887	6.12007	8.15484	20.8046	12.2711	18.4639
Dendrobium_GLEAN_10081843	2.08586	1.59737	2.90226	2.19498	2.90348	2.52129	2.52838	2.61464
Dendrobium_GLEAN_10115424	40.9368	40.699	46.7157	47.5265	50.826	61.2156	44.834	47.7679
Dendrobium_GLEAN_10110043	66.5405	87.2656	96.0211	62.8831	139.953	86.5954	246.566	62.6617
Dendrobium_GLEAN_10104981	0.0416441	7.13895	13.1246	7.36616	11.3414	0.037319	0.0434118	21.5201
Dendrobium_GLEAN_10092762	45.7007	49.9319	47.8999	52.7275	39.7502	38.3312	40.7505	41.6043
Novel02704	12.0481	24.1199	15.938	22.2193	21.6208	17.7333	12.6297	16.988
Dendrobium_GLEAN_10061559	0.0297759	0.201869	0.652377	0.183728	0.623783	0.346884	1.05535	0.815207
Novel00951	0.333153	0.0806661	0.526387	0.599572	0.623153	0.522466	0	0
Dendrobium_GLEAN_10016370	0.485085	0.187925	0.899293	0.798174	0.387131	0.695527	1.11249	0.664035
Dendrobium_GLEAN_10144409	25.7468	25.8307	29.4471	25.1103	28.1905	30.6865	22.835	20.1003
Dendrobium_GLEAN_10115522	1.32797	2.09597	1.98942	2.07381	2.50233	1.36635	2.25596	1.09409
PEQU_41772-D2	20.4579	4.36376	21.9597	10.8951	12.6338	23.1347	17.8988	5.93854
Novel03806	0.489568	2.27595	0.495057	2.3663	0.390709	0.438722	2.80692	1.96863
Dendrobium_GLEAN_10066344	0	0.0291332	0.202783	0.0309343	0.0600151	0	0	0.334563
Dendrobium_GLEAN_10083254	1624.94	1472.83	2393.02	1200.6	3363.65	1969.21	1116.6	1233.29
Dendrobium_GLEAN_10115599	286.578	239.048	222.867	274.467	256.487	281.745	231.606	231.819
Novel01075	0.0104295	1.30305	0.0175773	1.74827	0.0832342	0.0467314	1.35902	1.624
Dendrobium_GLEAN_10099899	1.10357	1.39769	0.357673	1.2222	0	0	0	0.65366
Dendrobium_GLEAN_10119603	16.4278	16.8847	16.7627	19.1928	11.4828	21.6318	10.9508	19.0269
Dendrobium_GLEAN_10132426	0.70277	1.44637	0.148052	1.26477	0.0876341	0.314891	0.549451	0.977057
Dendrobium_GLEAN_10082120	131.866	135.913	117.195	143.023	137.617	148.276	101.202	126.908
Dendrobium_GLEAN_10071315	4.69366	7.29816	4.2512	5.41798	3.53563	4.14895	4.02749	5.62749
Dendrobium_GLEAN_10057138	1.53325	2.63464	0.916926	3.15357	1.43087	1.68427	1.59833	0.846319
Dendrobium_GLEAN_10103453	64.6586	87.3519	84.9532	86.0941	86.842	69.12	213.225	173.225
Novel01402	1.19673	1.76909	2.07	1.03639	2.32486	1.97555	0.262639	1.29333
Dendrobium_GLEAN_10068210	0.0692435	0	0	0	0	0	0.433097	1.00712
Dendrobium_GLEAN_10068918	5.12796	5.99054	23.2543	10.2753	10.2839	8.5275	1.48796	1.99012
Novel02293	10.9556	22.5194	12.7676	24.0315	14.9984	12.2722	15.0655	22.4857
Dendrobium_GLEAN_10073355	0.281762	0.545783	0.0791447	0.0965875	0.0936939	0.0841662	0	0.0803553
Dendrobium_GLEAN_10046117	0	0	0	0	0	0	0	0
Dendrobium_GLEAN_10017643	0.481557	0.310931	0.135266	0	0	0	0	0.137335
Novel05797	3.5231	2.14394	2.36456	1.8276	3.63901	4.77771	4.12767	4.77478
Dendrobium_GLEAN_10064120	9.08569	19.2596	7.07846	25.9155	8.72172	8.29568	6.07597	0.146668
Dendrobium_GLEAN_10068611	17.075	0	0	0	0	9.91127	0	0
Dendrobium_GLEAN_10053851	17.812	25.6518	24.6029	21.5831	15.4513	8.53623	4.52092	10.2037
Dendrobium_GLEAN_10062187	0.21533	1.25131	0.362908	0.885778	0.537026	1.25428	0.561177	1.10538
Dendrobium_GLEAN_10084616	1.31769	0.170161	0.444156	0.271022	0	1.33828	2.10623	0.977057
Dendrobium_GLEAN_10008639	3.81233	0.582996	1.01449	0.412692	0	4.67505	1.67333	0.343336
Dendrobium_GLEAN_10033189	24.0528	23.0881	18.6184	24.9875	18.2861	15.6861	18.8213	28.4333
Dendrobium_GLEAN_10031326	1.35212	1.23252	4.15546	1.71769	1.26951	1.21169	0.165825	1.15683
Dendrobium_GLEAN_10001395	117.881	107.854	133.997	128.657	144.919	150.321	151.227	150.639
Dendrobium_GLEAN_10083454	17.1001	18.5578	15.02	15.8099	14.0027	18.5686	21.6583	26.8301
Dendrobium_GLEAN_10085442	0	0	0	0	0	0	0	0
Dendrobium_GLEAN_10042998	0.985512	0.556783	2.21458	1.52024	1.63855	1.17754	0.342449	0.632378
Dendrobium_GLEAN_10060664	0	0	0	0	0	0	0	0
Dendrobium_GLEAN_10059118	19.6122	23.1961	16.7842	19.7921	15.6641	16.4803	10.7637	18.8704
Dendrobium_GLEAN_10128669	7.53204	6.21862	8.53213	8.88875	11.9483	6.74978	12.0995	25.8823
Dendrobium_GLEAN_10114758	14.2103	14.4072	21.1978	17.8475	21.6561	14.2518	20.802	11.744
Dendrobium_GLEAN_10013049	18.9554	23.7908	30.765	26.4366	42.4301	23.8279	11.6395	10.4859
Dendrobium_GLEAN_10135267	64.8622	42.5917	27.2965	27.0137	25.3607	65.3829	11.1134	14.7121
Dendrobium_GLEAN_10006959	2.04077	2.69265	4.33665	4.10618	4.1897	2.78298	5.73472	5.46578
Dendrobium_GLEAN_10078025	11.9525	16.1541	11.9949	17.041	20.9747	14.8495	16.8774	13.201
Dendrobium_GLEAN_10140351	0	0	0	0	0	0	0	0
Dendrobium_GLEAN_10030415	0	0	0	0	0	0	0	0
Dendrobium_GLEAN_10042789	6.55315	20.0102	3.68145	7.20722	16.9789	4.48597	0.379518	3.81564
Dendrobium_GLEAN_10118415	157.862	135.76	169.983	162.639	185.429	175.484	203.237	181.227
Dendrobium_GLEAN_10035563	48.9759	32.6421	37.6325	25.2495	36.5789	52.6094	26.3335	30.8201
Dendrobium_GLEAN_10017148	3.9238	6.00042	7.13506	9.23851	5.45945	2.12827	1.50697	25.443
Dendrobium_GLEAN_10063411	22.528	31.7453	56.9942	33.2383	29.408	21.2795	14.0165	15.6277
Novel03124	2.61639	1.74474	8.45766	1.45562	8.94272	3.38246	12.9219	11.853
Novel02217	0.563524	0.454819	4.90697	0.0965875	4.591	2.27249	3.72049	0.0803553
Novel03105	0	0	0	0.025361	0	0	0	0
Dendrobium_GLEAN_10049607	0.349645	0.253978	0.294638	0.53936	0.436001	0.234999	0.364487	0.224358
Dendrobium_GLEAN_10053624	9.41481	12.5253	14.0364	13.477	16.4103	15.267	23.6913	16.11
Dendrobium_GLEAN_10072932	3.77617	1.1175	4.56689	2.08553	3.76705	5.26397	1.23926	0.717947
Dendrobium_GLEAN_10110402	0.197286	0.573225	0.581869	0.608663	1.27926	0.795582	0.20566	0.928351
Novel05397	1.46128	0.849163	0.430984	1.05194	0.364437	4.45233	4.95074	0.875153
Dendrobium_GLEAN_10143583	0.126726	0.163648	0.213577	0.0868825	0.210699	0.0757093	0.044035	0
Dendrobium_GLEAN_10132442	0	0	0	0	0	0	0	0
Novel04497	4.61492	4.8583	4.56521	3.30154	1.53459	2.75708	2.30083	4.57782
Dendrobium_GLEAN_10047321	2.59961	1.40603	1.99148	2.11791	1.58294	2.75318	1.75971	8.78101
Dendrobium_GLEAN_10099464	10.1269	18.7778	8.97129	16.4672	9.41164	9.61805	13.6245	10.6636
Dendrobium_GLEAN_10114963	22.9743	27.3036	27.814	23.2139	30.8253	29.309	47.4807	36.1362
Novel05525	57.9675	80.7538	93.8929	65.2489	53.0577	29.5121	69.2208	38.6097
Dendrobium_GLEAN_10049776	0	0	0	0	0	0	0	0
Dendrobium_GLEAN_10068200	2.11885	2.28016	1.58712	1.9369	0.939437	3.5866	2.20879	1.20854
Dendrobium_GLEAN_10035285	25.4004	20.5101	42.4626	20.6922	59.339	28.5975	63.0472	16.763
Dendrobium_GLEAN_10013749	32.5977	53.1572	21.1222	41.2057	15.8284	28.4376	40.1599	33.9111
Dendrobium_GLEAN_10104912	0	0.565329	0.122969	0.30014	0.145574	0.523083	1.06485	0.749098
Dendrobium_GLEAN_10122539	3.37788	1.93318	2.19954	2.13164	1.30194	0.343984	0.560201	1.18227
Dendrobium_GLEAN_10109041	2.88279	4.18805	4.63077	4.44697	5.66179	3.06777	5.44685	4.93283
Dendrobium_GLEAN_10095967	44.395	34.3001	36.5603	34.5529	37.4433	45.4805	78.2544	73.7212
Dendrobium_GLEAN_10125997	9.37638	9.69341	11.3814	10.7261	11.0563	11.8202	16.891	14.9446
Dendrobium_GLEAN_10085845	18.3362	10.5238	15.7785	13.7685	15.0013	15.0408	9.30444	11.4546
PEQU_26302-D1	95.0367	90.4855	89.6691	77.1734	90.4036	96.196	105.459	62.9154
Dendrobium_GLEAN_10085437	67.638	90.8846	103.914	85.0811	96.0271	71.3322	69.4701	61.8892
Novel01801	0	0	0	0	0	0	0	0
Novel04043	0.155341	0.451352	0.58906	0.319504	0.309932	0.0696037	0.566773	2.06002
Novel00535	0.369395	0.143106	0.809329	0.22793	0.884407	0.662061	1.84836	0.632084
Dendrobium_GLEAN_10132406	15.5993	20.38	15.8301	20.616	17.7469	17.4294	30.5162	18.9119
Dendrobium_GLEAN_10025685	0.127029	0.369091	0.642268	0.914454	0.316807	0.227673	0.397265	0.271705
Dendrobium_GLEAN_10102806	78.4303	67.2117	87.6605	64.4695	115.655	109.904	55.2198	74.48
Dendrobium_GLEAN_10020436	0.456649	0.442273	0.128269	0.156538	0.151849	0.409222	0.158678	0.130231
Dendrobium_GLEAN_10012356	0	0	0	0.512951	0.0995166	0	0	0.0853492
Dendrobium_GLEAN_10009533	17.1428	27.4505	3.467	27.9135	2.90724	1.68986	1.54878	22.6358
Novel03854	17.7307	30.7109	22.7528	27.843	23.119	20.2406	33.5154	24.2968
Dendrobium_GLEAN_10107350	11.7275	4.72198	31.9237	12.738	21.4265	31.8827	13.5989	6.20055
Dendrobium_GLEAN_10064335	22.8142	10.5366	15.6863	9.3444	13.4007	20.2467	10.6497	8.36232
Novel01760	0	0	0	0	0	0	9.39223	4.5852
Dendrobium_GLEAN_10036661	0.933098	0.903722	0.604846	2.06682	0.966646	0.996993	0.187059	0.552688
Dendrobium_GLEAN_10066845	4.16526	6.31429	6.56211	3.44545	6.59413	4.7064	5.66357	5.88778
Dendrobium_GLEAN_10047274	61.8132	61.9432	65.5227	51.0035	72.0348	68.6474	55.2198	64.714
Dendrobium_GLEAN_10112339	4.14139	5.19255	5.00483	4.91929	7.20591	6.90469	5.68932	7.44353
Dendrobium_GLEAN_10037051	0.15354	0.0297412	0.0258769	0.136846	0.0204225	0.0458645	0.170728	0.0700605
Dendrobium_GLEAN_10083777	0.171428	1.66031	1.7335	0.352591	1.53913	0	0.35741	0.586672
Dendrobium_GLEAN_10065294	0	0	0	0	0	0	0	0.0696166
Dendrobium_GLEAN_10020690	3.57001	3.73797	4.47189	4.41558	2.59885	2.93984	0.804661	2.88928
Dendrobium_GLEAN_10044727	31.9279	26.9403	0.747358	30.347	0.509398	35.2591	9.44144	10.623
Dendrobium_GLEAN_10055192	0	0	0	0	0	0	0	0
Dendrobium_GLEAN_10063713	7.13223	8.66262	1.33198	4.87661	3.65365	9.50086	34.2411	22.7262
Dendrobium_GLEAN_10061126	116.527	183.887	136.301	209.08	116.546	91.7703	55.3244	148.75
Dendrobium_GLEAN_10022163	0	0	0	0	0	0	0	0
Dendrobium_GLEAN_10081429	12.0129	11.3716	13.7092	12.4471	15.4465	15.5257	12.9318	12.9893
Novel04865	6.46186	5.33125	6.45363	5.25064	7.40125	8.22142	1.24744	4.36823
Dendrobium_GLEAN_10043393	11.7714	33.2863	11.6022	50.5843	2.30665	4.05	0.109563	0.179843
Dendrobium_GLEAN_10048828	0	0	0	0	0	0	0	0
Dendrobium_GLEAN_10023509	34.9696	34.0773	26.9277	32.6409	24.2306	23.3103	17.4189	29.2188
Dendrobium_GLEAN_10070160	5.32375	2.14839	4.18711	1.73372	4.86831	4.45277	1.29494	2.73289
Dendrobium_GLEAN_10066907	3.79254	5.78069	7.02047	5.11506	8.7452	10.8088	11.5365	6.48954
Dendrobium_GLEAN_10036192	69.187	70.4989	130.269	117.474	113.475	93.0019	217.749	125.89
Dendrobium_GLEAN_10042961	0.530774	0.376981	0.387635	0.145559	0.635391	0.856168	0.442644	0.423838
Dendrobium_GLEAN_10103664	0	0.0456844	0.026499	0	0	0	0.0655623	0
Dendrobium_GLEAN_10083116	7.20059	8.36868	6.12053	8.04896	5.62163	8.47273	6.20081	6.26772
Dendrobium_GLEAN_10066272	18.7963	31.2603	31.1983	30.6546	36.46	18.5455	40.6727	30.7009
Dendrobium_GLEAN_10080114	0.396788	1.15289	10.9504	1.22417	8.51035	0.533368	1.2409	1.18818
Novel02477	0.813321	1.40038	0.215763	1.08424	0.270452	1.26874	0	0.734508
Dendrobium_GLEAN_10053267	12.3154	10.3469	5.62659	12.8177	16.5783	14.8925	8.35258	10.7906
Dendrobium_GLEAN_10064329	5.59556	3.73336	5.23916	2.81328	2.85304	2.78578	1.16662	4.78737
Dendrobium_GLEAN_10096559	82.3218	91.735	116.669	105.343	97.7543	116.841	115.681	106.948
Dendrobium_GLEAN_10132764	31.1016	38.7164	29.6074	44.6126	31.2947	41.2047	24.5733	21.3182
Dendrobium_GLEAN_10063398	12.8984	23.0442	33.188	24.9196	55.7791	38.7726	30.4819	39.4812
Dendrobium_GLEAN_10089881	3.56709	5.93072	5.05993	6.54193	6.34594	6.2334	4.64813	6.15462
Dendrobium_GLEAN_10082382	0	0	0	0	0	0	0	0
Dendrobium_GLEAN_10033886	0.414486	0.883161	0.209566	0.511506	0.413485	1.11431	0.604912	0.638316
Dendrobium_GLEAN_10111024	0.397906	0.867103	0	1.38107	0.0992363	0.0891451	0.622195	3.65968
Dendrobium_GLEAN_10124628	74.7896	69.3852	71.8372	77.0288	86.2771	90.2026	103.757	77.4584
Dendrobium_GLEAN_10017697	0	0	0	0	0	0	0	0
Dendrobium_GLEAN_10027635	24.8667	44.0701	23.7558	39.3803	16.3224	12.3414	4.14036	13.6294
Dendrobium_GLEAN_10011260	188.378	229.939	191.189	229.825	192.91	182.73	144.924	191.656
Novel04744	54.957	67.1053	34.2358	59.5531	37.2098	32.2717	16.5044	40.6368
Dendrobium_GLEAN_10109799	32.1154	29.3695	33.0469	34.2774	35.548	36.4623	26.4095	31.5272
Dendrobium_GLEAN_10033701	10.6804	9.42652	4.35489	6.11187	3.17919	5.48025	4.75878	5.3795
Dendrobium_GLEAN_10025078	0	0	0	0	0	0	0	0
Dendrobium_GLEAN_10113994	7.77753	10.0775	4.7826	10.4843	5.24239	3.67325	6.02597	9.53167
Dendrobium_GLEAN_10091598	1.55432	1.50539	1.28359	2.26981	1.33349	1.72719	1.91195	1.46281
Dendrobium_GLEAN_10010333	8.05861	0.695979	1.51387	0.686221	1.43373	6.3477	2.0868	7.59732
Dendrobium_GLEAN_10077239	18.8062	17.8717	15.7172	16.4767	16.8869	18.5562	58.7445	24.7494
Dendrobium_GLEAN_10120257	10.1783	16.9298	7.57012	21.7992	6.40124	6.62276	7.84242	10.7906
Dendrobium_GLEAN_10025484	0	0	0	0	0	0	0.084434	0
Dendrobium_GLEAN_10129454	0.97017	0.751701	3.43366	0.798174	2.51635	0.695527	0.606811	0.332018
Dendrobium_GLEAN_10029538	26.2839	24.9174	30.2157	28.8761	32.1196	26.2973	20.0747	23.2495
Dendrobium_GLEAN_10053321	1.39858	1.26989	1.32587	2.60691	0.436001	1.33166	4.10048	5.01067
Dendrobium_GLEAN_10055219	3.32163	0.282198	6.53114	0.119858	7.20855	4.90886	11.0561	3.19088
Dendrobium_GLEAN_10108994	47.6592	39.0574	41.8005	43.3187	52.9926	47.4697	29.7158	38.4711
Dendrobium_GLEAN_10097928	47.4997	46.6955	58.4477	50.5881	65.1049	54.0075	115.069	96.2267
Novel03067	15.5533	13.1534	20.5618	12.4018	21.5308	19.1899	33.6606	20.1531
Novel01284	41.4389	42.1348	42.462	40.934	42.7555	37.9449	55.6684	39.393
Dendrobium_GLEAN_10028745	12.0585	15.4924	15.3976	15.6909	11.4156	9.75859	6.73413	11.3169
Novel03288	0	5.72792	0.0269388	4.66838	0	0	0	5.14196
Novel00839	46.8028	42.5663	46.327	42.4226	31.5368	44.0149	36.331	31.8628
Novel02786	7.75781	9.74417	11.951	10.9699	15.8409	6.19171	9.09801	29.8679
Dendrobium_GLEAN_10021736	15.0361	9.35222	14.298	9.07923	10.5962	11.7438	12.9421	16.7591
Dendrobium_GLEAN_10115193	0	0	0.0319983	0	0	0	0	0
Dendrobium_GLEAN_10098956	0.0404979	0.196115	0.0341266	0.208239	0.0404001	0.217751	0.084434	0
Dendrobium_GLEAN_10077420	0	0	0	0	0	0	0	0
Novel05757	0	0	0.177839	0.108517	0	0.472806	54.0098	0.0902797
Dendrobium_GLEAN_10144050	13.6509	20.5502	14.254	18.311	14.654	16.2222	17.9426	14.0912
Dendrobium_GLEAN_10057812	3.97284	6.41295	5.85869	4.08565	6.05497	5.63703	8.16793	11.8022
Dendrobium_GLEAN_10119170	26.1516	17.1012	90.723	18.2075	10.045	5.94441	6.61643	11.0239
Dendrobium_GLEAN_10081671	0	0	0	0	0	0	0	0
Dendrobium_GLEAN_10120642	0.0700678	0	0	0	0	0.0627907	0	11.0304
Dendrobium_GLEAN_10067267	0	0	0	0	0	0.0354781	0	0
Dendrobium_GLEAN_10005410	7.81957	9.77212	5.314	5.44754	5.7876	7.23348	1.57771	4.10042
Dendrobium_GLEAN_10012363	63.074	69.7271	64.042	5.80322	11.2587	3.67034	37.5723	186.655
Novel04244	23.3535	19.2824	21.0829	20.3382	21.9756	32.0366	25.6075	21.6158
Novel00710	1.89861	3.67768	0.479975	3.31929	1.13642	0.510427	6.7293	0.162439
Dendrobium_GLEAN_10095982	2.38435	2.87101	3.09531	3.11477	3.08574	1.96347	5.97879	2.86698
Dendrobium_GLEAN_10018036	39.3889	54.7441	41.4681	58.7732	41.4825	45.129	31.8031	26.0123
Dendrobium_GLEAN_10002244	1.61252	2.88925	0.543533	1.16081	0.482588	0.867027	1.76502	2.06942
Dendrobium_GLEAN_10095016	0	0	0.903991	0.0298168	0.752012	0.129912	110.379	0.396895
Dendrobium_GLEAN_10046491	0	0	0	0	0	0	0	0
Dendrobium_GLEAN_10025439	0.58857	0.760054	0	0.807042	0.195716	0	0.409036	0
Novel03600	1.42205	1.30841	3.05573	2.48612	2.12792	1.21064	0.518844	2.55498
Novel03493	24.6327	26.1796	33.5241	26.9014	20.9851	31.1581	65.9002	30.4001
Dendrobium_GLEAN_10060246	40.582	65.6649	24.6617	33.3741	3.60074	4.22536	3.72878	10.9893
Dendrobium_GLEAN_10114908	24.1557	45.7772	11.2462	38.5989	4.87006	4.20438	1.02443	28.9931
Dendrobium_GLEAN_10054707	0	5.31037	4.93363	5.54311	7.04578	0.0832803	12.594	9.85918
Novel01733	31.9126	25.9663	29.4718	30.3383	38.9615	40.7359	14.6028	22.4618
Dendrobium_GLEAN_10116031	30.11	30.0621	28.153	25.6608	29.9446	31.5632	42.1899	26.7947
Dendrobium_GLEAN_10061776	0.665707	0.767559	0.0534262	1.30402	0.0632476	0.7102	1.42098	0.108487
Dendrobium_GLEAN_10102676	42.1054	38.8066	4.48284	38.0629	3.95196	46.354	35.0434	38.5417
Dendrobium_GLEAN_10068093	12.9184	19.833	19.7756	16.7661	21.807	13.3461	19.3181	18.7749
Dendrobium_GLEAN_10004338	0	0	0	0	0	0	0	0
Novel02346	0	2.03384	0	2.75346	0	0	1.58709	0.0449162
Dendrobium_GLEAN_10106118	7.06284	9.44284	16.4965	11.6056	16.5423	10.1819	10.5638	4.86045
Dendrobium_GLEAN_10089632	50.0917	56.8968	62.13	57.7784	62.0925	59.7625	52.8943	47.9465
Dendrobium_GLEAN_10095963	14.9406	5.65655	7.89743	8.66018	7.18127	14.7278	3.53973	3.7186
Novel03630	36.3134	30.9071	44.0461	34.1837	54.6792	48.9829	39.1009	42.9992
Dendrobium_GLEAN_10035387	1.91781	10.8884	4.0681	4.48861	3.56247	2.252	11.7885	11.0896
Dendrobium_GLEAN_10109874	3.33386	4.66397	3.64176	4.69834	3.81852	3.54087	1.28718	2.85233
Dendrobium_GLEAN_10031779	12.6122	10.252	12.0324	8.56968	11.4584	15.7022	36.8132	16.8025
Dendrobium_GLEAN_10034451	0	0	0	0	0	0	0	0
Dendrobium_GLEAN_10104910	12.1624	13.9919	14.7752	11.6824	21.7409	14.2188	6.37152	13.5222
Dendrobium_GLEAN_10060324	0	0	0	0	0	0	0	0
Dendrobium_GLEAN_10032103	3.01831	5.0183	3.00975	5.01815	3.76377	2.52451	3.67083	3.52922
Dendrobium_GLEAN_10069829	0.141031	0.0819547	0	0.261064	0.0281381	0.0505535	0	0.0723968
Dendrobium_GLEAN_10061401	1.28215	1.38371	0.864352	1.43158	1.05979	1.67424	59.0004	3.2909
Novel02273	0	0	0.760437	0	0.720182	0.161737	1.12886	0
Dendrobium_GLEAN_10121673	5.75399	6.84048	5.26495	8.30463	7.51385	5.44408	2.90902	7.52171
Dendrobium_GLEAN_10025244	3.97063	3.71672	4.09365	1.80216	2.78822	2.72335	3.39921	4.83949
Dendrobium_GLEAN_10117779	0.353142	0.85506	0.743961	1.27109	0.880722	2.05702	2.39286	1.81282
Dendrobium_GLEAN_10123209	0.0748182	0	0	0.0769426	0	0	0	0.128024
Dendrobium_GLEAN_10018131	0	53.157	11.9473	50.0923	13.0156	0	41.7096	0
Dendrobium_GLEAN_10092062	6.16934	5.15097	9.74021	6.41744	12.0259	10.4217	1.47844	4.12555
Dendrobium_GLEAN_10023633	0.259663	0.670636	0.437624	3.64949	0.259036	0.542955	3.24823	0.296212
Dendrobium_GLEAN_10134228	0	0	0.173014	0.211145	0.409638	0	0	0.351321
Novel00847	0	2.16251	0.324401	2.53374	0	0	0	2.83253
PEQU_05891-D44	0	0	0	0	0	0	0	0
Dendrobium_GLEAN_10027214	18.2679	22.3176	14.7856	23.7545	19.2208	14.0817	13.0235	14.5367
Dendrobium_GLEAN_10049918	2.936	4.83209	0.882372	2.36482	1.06506	1.19594	0.599285	4.97119
Dendrobium_GLEAN_10076745	70.7621	75.6599	82.9629	74.4221	51.1086	34.8831	11.4344	41.6581
Dendrobium_GLEAN_10101987	0.079322	0.0614599	0.0802114	0.179464	0.0949566	0.0853005	0.0496135	0.13573
Dendrobium_GLEAN_10104603	0.110357	0.106883	1.11594	0.226981	1.54126	0.263721	5.2919	0.37767
Dendrobium_GLEAN_10074861	16.0477	19.6397	31.0759	20.4519	33.2335	25.9188	25.8843	12.1956
Dendrobium_GLEAN_10104596	1.98758	1.70117	2.49285	0.475352	4.24222	4.92923	2.74654	1.85869
Dendrobium_GLEAN_10047846	2.37692	4.82342	0.429208	2.61901	0.338739	0.557871	0.53096	3.34093
PEQU_14676-D1	4.0309	3.56452	4.98435	3.42442	7.34299	5.92881	16.7167	7.23477
Dendrobium_GLEAN_10028290	4.07471	3.74405	4.7543	3.06222	4.5339	4.58781	6.80718	4.02252
Dendrobium_GLEAN_10125089	45.7731	23.894	32.8172	28.0286	34.5538	55.1333	141.224	76.113
Dendrobium_GLEAN_10054327	697.128	752.875	827.725	799.644	830.054	781.981	834.66	845.048
Dendrobium_GLEAN_10101650	4.56519	9.13526	1.78042	3.29801	1.27968	1.14955	1.8092	3.42163
Dendrobium_GLEAN_10102297	13.0825	9.85493	10.9883	8.83741	7.4211	9.57824	6.81891	8.63246
Dendrobium_GLEAN_10111649	32.4579	33.6994	41.7931	32.5784	44.0361	41.8851	41.4149	47.0977
Dendrobium_GLEAN_10020905	4.86613	22.0834	25.8922	17.4436	30.5132	6.6034	35.6538	13.0846
Dendrobium_GLEAN_10036355	23.1643	23.4798	22.7255	23.063	18.4074	21.9287	59.7179	27.1534
Dendrobium_GLEAN_10057898	0.542653	46.1288	49.4918	45.3747	55.1336	0.822959	29.4158	0.392848
Dendrobium_GLEAN_10005644	0.577029	0.44709	2.23674	1.30551	0.575635	0.31026	3.12792	2.86338
Novel04215	0.0631111	0.101874	0.0709097	0.259612	0.0629587	0.113113	0.570181	0.701944
Dendrobium_GLEAN_10026262	63.0456	40.6547	40.8037	53.4727	64.2441	97.3178	49.5736	36.0524
Dendrobium_GLEAN_10024637	0.59742	0	0	0.819178	0.132439	0	0	0.0567925
Dendrobium_GLEAN_10028155	6.74479	8.44439	7.16235	5.18813	6.89261	6.92881	0.0571634	5.81753
Dendrobium_GLEAN_10043558	10.9679	15.5253	11.5784	14.502	13.4062	11.8269	5.59109	7.52762
Dendrobium_GLEAN_10070620	15.1859	9.65079	17.0288	10.7393	11.2526	12.5014	14.4178	14.5271
Dendrobium_GLEAN_10029411	0.499729	2.32318	0.982589	2.26124	0.963809	0.477683	0	3.3349
Dendrobium_GLEAN_10057155	0	0	0	0	0	0	0	0
Dendrobium_GLEAN_10072217	0	0.0168651	1.92226	0.0537232	0.104227	0.0312096	0.127067	0.372456
Dendrobium_GLEAN_10032176	0	0	0	0	0	0	0	0
Dendrobium_GLEAN_10067548	18.5337	20.578	16.3918	23.3956	16.6983	19.8632	14.7514	26.3923
Dendrobium_GLEAN_10049862	0	0	0	0	0.429621	0	0.149647	0
Novel03359	0.956056	1.44115	0.581519	2.4617	0.41592	0.360742	0.0149871	0.0984023
Dendrobium_GLEAN_10091972	65.1775	51.0329	51.2528	53.062	45.8022	75.985	35.8176	63.5761
Dendrobium_GLEAN_10019552	0	0.0130643	0.0227337	0.013872	0.0403692	0.012088	0.0281232	0
Dendrobium_GLEAN_10063085	48.451	171.149	307.821	263.225	433.456	189.246	45.9429	53.0551
Dendrobium_GLEAN_10144343	0	0.0859357	0	0	0	0	0	0
Dendrobium_GLEAN_10108517	0.325977	0.315715	0.0457822	0.502849	0.0541983	0.827678	0	0.0929649
Novel00349	0.484493	1.25131	1.08872	1.16258	2.89994	2.8945	1.01012	0.829032
Dendrobium_GLEAN_10058295	8.09283	20.9015	24.8577	19.2753	24.8489	9.19883	17.4571	19.1533
Dendrobium_GLEAN_10010245	0	0	0	0	0	0	0	0
Dendrobium_GLEAN_10075061	36.3191	33.9243	57.8233	34.1025	55.8507	36.2777	88.8905	89.9039
Dendrobium_GLEAN_10068796	0.877371	2.33681	2.21802	1.46621	2.29754	2.45703	1.02894	4.12857
Dendrobium_GLEAN_10079721	0.97195	1.83788	0.682533	0.785359	1.10812	0.80879	0.771968	0.772169
Dendrobium_GLEAN_10051049	4.96747	20.3378	6.69755	16.5795	7.92875	4.57296	18.5949	18.3909
Dendrobium_GLEAN_10102083	94.2751	89.4339	77.0775	79.4352	77.4289	87.1117	128.521	104.68
Dendrobium_GLEAN_10142487	193.619	164.82	153.923	165.305	141.523	221.253	78.7041	155.756
Dendrobium_GLEAN_10057526	1.05018	1.79013	1.12096	2.24641	1.67624	1.11679	1.94138	2.77936
Dendrobium_GLEAN_10090623	0.309773	0	0	0	0.309025	0.1388	0.807308	0
Dendrobium_GLEAN_10048744	20.059	33.1336	19.6384	27.8385	16.2545	13.38	10.286	22.3825
Novel00632	4.66383	10.4604	9.59771	8.63326	8.08077	5.71925	6.14122	5.79631
Dendrobium_GLEAN_10081021	2.46378	0	1.73014	0	2.25301	2.39189	8.56122	1.58094
Dendrobium_GLEAN_10049452	0.501881	0.486081	0.269133	1.97068	0.0455154	0.0817739	0.285374	0.585535
Dendrobium_GLEAN_10093016	0.278064	0.26931	0.351477	3.14556	0.416089	0.124593	0	0.95161
Novel03717	4.37091	6.85392	7.19113	6.42146	6.33289	9.88564	7.91954	6.23267
Dendrobium_GLEAN_10045196	0.135824	0	0	0	0	0	0.0707947	0
Novel05034	0	0	0	0	0	0	0	0.125541
Novel02570	0.707226	0.342481	0.297982	0.436385	0.141104	0.50702	0.589798	2.66235
Dendrobium_GLEAN_10061862	0	0.172739	0	0.0917094	0	0	0	0.152594
Dendrobium_GLEAN_10068003	16.4136	15.4152	20.1603	18.8746	23.2213	24.6932	11.6662	11.745
Dendrobium_GLEAN_10053404	39.8708	48.9131	57.357	44.3222	73.1094	52.6591	19.0993	23.3912
Dendrobium_GLEAN_10093967	8.74113	0.507957	0.147319	1.43829	0	3.28998	0.546731	0.149572
Dendrobium_GLEAN_10037231	65.7686	41.6548	58.9026	42.3975	62.0546	63.0752	39.4307	73.5244
Dendrobium_GLEAN_10030310	0	0	0	0	0	0	0	0
Dendrobium_GLEAN_10027304	0	0	0.163508	0	0.258087	0	0	0
Dendrobium_GLEAN_10050662	0	0	0	0	0	0	0	0
Dendrobium_GLEAN_10006781	28.67	33.5854	32.3661	30.0457	32.505	28.2208	34.2515	27.0988
Dendrobium_GLEAN_10084220	52.5353	58.2708	63.65	65.5722	59.9109	66.5162	60.56	54.1793
Dendrobium_GLEAN_10012154	14.3699	12.0982	10.2888	13.9086	11.8991	10.5208	10.7698	12.214
Dendrobium_GLEAN_10077023	13.0191	13.2396	9.66806	12.6356	13.3123	9.77104	4.91974	14.2018
Dendrobium_GLEAN_10067799	24.65	10.4978	18.8568	2.87659	9.24322	13.1599	3.64487	7.47861
Dendrobium_GLEAN_10043953	0.632223	2.27433	0	1.39323	0	0	0	0.695454
Dendrobium_GLEAN_10061390	0.233354	0	0.196642	0	1.00876	1.25471	1.45956	0.266199
Dendrobium_GLEAN_10050571	0	0	0.0483091	0	0	0.0513742	0	0
Dendrobium_GLEAN_10086799	0.533447	0	0.539428	0.164578	0	0.143413	0.0556091	0
Dendrobium_GLEAN_10072885	16.8242	15.8106	18.0375	17.4732	15.7034	22.5407	24.137	33.1352
Novel04170	8.01539	5.73791	2.8388	4.898	5.33069	9.57723	16.4691	6.26137
Dendrobium_GLEAN_10029728	0	0	0	0	0	0	0	0
Novel03931	16.5412	20.5977	27.7118	27.1364	24.1626	23.1172	3.90029	44.1411
Dendrobium_GLEAN_10001941	0.0777845	7.60891	8.42281	8.1993	9.2728	0.034853	6.04094	7.021
Dendrobium_GLEAN_10045990	27.4965	33.8108	26.8053	28.1387	25.0098	24.6408	18.8281	27.2153
Novel04133	6.87938	4.44187	8.69564	4.24483	12.5817	5.75391	5.01999	5.68957
Dendrobium_GLEAN_10123967	5.81789	7.99895	7.26819	7.07092	9.01015	9.8075	15.6499	8.87612
Dendrobium_GLEAN_10072233	23.1194	32.8491	26.1189	20.9018	25.3445	22.3119	26.2195	21.193
Dendrobium_GLEAN_10117224	3.74544	5.18218	6.11916	4.00901	6.02399	6.64439	8.36664	10.6598
Dendrobium_GLEAN_10127850	76.7377	65.8396	64.8138	61.085	50.5182	59.0524	32.1011	32.3286
Dendrobium_GLEAN_10131352	31.6701	36.1672	37.1347	33.342	37.0278	34.3735	24.7902	34.0707
Dendrobium_GLEAN_10109885	5.76558	0	2.1256	0	2.756	10.495	5.63468	0.0513837
Dendrobium_GLEAN_10094191	0.972636	2.24635	0.441333	1.15414	1.04492	2.14553	0.935929	1.72832
Novel03786	6.33906	5.71608	5.09618	6.06947	10.8303	5.02774	3.72183	5.17413
Dendrobium_GLEAN_10107774	1.37439	1.3681	1.72116	1.41341	1.82809	1.76194	2.1491	2.59674
Dendrobium_GLEAN_10070775	8.17547	9.93276	10.1097	10.9448	10.6169	9.36389	9.22852	7.94659
Novel04165	0	0	0	0	0	0	1.28668	0
Dendrobium_GLEAN_10063633	0	0.190013	0.495974	0	0.587148	0	1.84066	0
Dendrobium_GLEAN_10040208	5.87517	3.54873	3.19411	2.98851	2.52085	3.142	1.15247	2.37817
Dendrobium_GLEAN_10055921	3.23785	7.23352	6.47555	7.28114	9.30249	6.11265	15.7514	4.94942
Dendrobium_GLEAN_10106329	5.74223	9.11552	5.4783	7.38451	5.95434	6.12022	6.04502	6.09505
Dendrobium_GLEAN_10040550	55.4543	62.8317	53.8707	60.4336	55.2024	71.5225	63.1084	57.8644
Dendrobium_GLEAN_10025636	0	0	0	0	0	0	0	0
Dendrobium_GLEAN_10062936	63.0778	67.6679	80.4299	64.4073	85.1722	73.7661	128.785	104.145
Dendrobium_GLEAN_10110934	4.13031	0.500035	0.348052	0.424759	0.515042	0.462668	0	0.353375
Dendrobium_GLEAN_10025389	141.221	107.912	157.568	136.596	153.677	169.89	521.583	318.846
Dendrobium_GLEAN_10129929	6.60254	12.6797	9.76051	12.222	9.14596	6.39016	14.4342	9.23193
Novel00256	23.2203	25.3004	26.6603	27.3123	29.2448	22.2392	6.65664	26.0748
Dendrobium_GLEAN_10125825	1.07665	0.208551	1.45163	1.32867	0.859241	1.1578	5.3873	2.39498
Novel01383	0	0	0	0	0	0	0	0
Dendrobium_GLEAN_10054177	0	0	0	0	0	0	0	0
Dendrobium_GLEAN_10064592	2.69211	1.22699	1.7348	0.977136	1.18483	1.41913	3.96196	0.948409
Dendrobium_GLEAN_10051556	0	0	0	0	0	0	0	0
Dendrobium_GLEAN_10126612	1.40554	3.0629	1.77662	1.98749	1.66505	1.02339	1.8315	2.85601
Dendrobium_GLEAN_10062381	16.9364	10.8191	3.03657	9.07923	4.31374	12.594	8.26419	4.77868
Dendrobium_GLEAN_10139177	0	0	0	0	0	0	0	0
Dendrobium_GLEAN_10126722	0.470072	0.199182	0	0.271924	0.0586171	0.210626	0.0918799	0.45245
Dendrobium_GLEAN_10001253	34.1115	9.31831	4.28411	6.74617	6.05326	30.8627	159.733	24.1802
Dendrobium_GLEAN_10062493	0.168967	0.40912	0.0711924	0	0	0	0	0
Dendrobium_GLEAN_10145358	0.0468358	0	0.0789348	0.0240828	0.070084	0	0	0
Dendrobium_GLEAN_10029867	0	0	0	0	0	0	0	0
Novel05901	1.92124	1.43544	1.48021	1.86289	1.97136	2.41038	5.66504	3.00571
Dendrobium_GLEAN_10060224	0	0	0	0	0	0	0	0
Dendrobium_GLEAN_10072205	34.7552	36.6386	38.1124	35.5307	40.8626	36.28	47.062	35.1859
Dendrobium_GLEAN_10087017	0.437327	0.264725	0.138197	0.112436	0.272669	0.587861	0.455891	1.54342
Dendrobium_GLEAN_10129525	23.3837	22.6475	15.9133	15.2839	26.3877	10.9358	5.1169	28.6388
Dendrobium_GLEAN_10050437	7.6514	6.84048	6.11701	7.46514	4.11004	4.74697	15.1343	5.87487
Dendrobium_GLEAN_10011792	0.0761081	0.442273	0.256538	0.156538	0.0759243	0.0682037	0.0793388	0.195347
Dendrobium_GLEAN_10062367	215.617	111.644	214.236	121.352	234.573	251.242	266.222	160.894
Dendrobium_GLEAN_10054823	2.04077	4.98427	4.33665	3.0112	6.10752	1.19271	1.01745	1.89784
Dendrobium_GLEAN_10099767	0.937831	0.939627	2.1256	1.79589	2.54861	2.75313	3.97799	1.93677
Dendrobium_GLEAN_10060089	12.7017	77.7829	24.7187	96.1812	35.3994	16.2826	23.8692	34.502
Dendrobium_GLEAN_10137064	0	0	0	0	0	0	0	0
Dendrobium_GLEAN_10067310	0	0	0	0	0	0	0	0
Dendrobium_GLEAN_10101491	6.64737	7.74584	7.70218	6.99634	8.03011	11.309	5.79267	11.1524
Dendrobium_GLEAN_10117487	15.9192	28.3113	24.867	20.5534	28.3287	25.9775	21.0154	14.7202
Dendrobium_GLEAN_10039777	4.43431	3.44094	4.38948	5.52171	8.36753	4.45253	0.25062	6.83348
Dendrobium_GLEAN_10058872	6.99359	28.3008	0.583498	10.9663	0.138153	0.31026	0	10.2489
Dendrobium_GLEAN_10090247	0	0	0.05314	0	0	0	0.131476	0
Novel02826	0.621919	0.144038	0.148109	0.278077	0.161848	0.327127	0.211408	1.83919
Dendrobium_GLEAN_10096125	112.268	126.474	163.579	133.841	190.082	165.774	321.972	375.035
Dendrobium_GLEAN_10070071	0.720697	1.97769	0.101219	6.36163	0.119826	0.0538206	0.0626075	8.99214
Dendrobium_GLEAN_10080016	0.221637	0.500872	0.560305	0.94971	0.0368503	0.165515	0.0385076	2.55994
Novel02796	3.80268	6.29786	5.35139	7.11738	6.82828	4.56636	12.1698	6.34421
Dendrobium_GLEAN_10104561	59.192	50.2249	57.4109	46.1225	62.2738	71.0829	204.143	126.084
Novel01468	0	3.39641	0	3.60638	0	0	0	9.94838
Dendrobium_GLEAN_10069718	14.2205	15.6092	4.39386	11.0901	2.95544	6.79656	2.47069	14.1943
Novel00184	56.1759	66.4574	53.5334	64.9439	49.8345	77.7085	44.2152	82.0928
Novel05875	0.532375	0.257807	0.14954	0.456243	0.619604	0.715624	0.369982	1.51827
Dendrobium_GLEAN_10056744	4.14501	12.6758	7.64588	13.7279	8.69327	5.32316	22.2172	5.36138
Dendrobium_GLEAN_10007645	131.288	174.858	123.234	158.039	119.761	152.327	186.532	149.261
Dendrobium_GLEAN_10050603	1.95551	0.111409	2.08406	0.591481	1.26227	2.26783	1.19913	0.590494
Dendrobium_GLEAN_10017375	58.7981	54.2108	45.3816	63.9177	42.0985	64.0842	41.783	46.3779
Dendrobium_GLEAN_10125802	49.4149	48.6448	46.6881	50.2405	42.0755	46.4633	63.9353	52.5268
Dendrobium_GLEAN_10087164	26.3215	15.1304	16.5939	21.6686	26.5854	34.6464	47.693	11.2318
Dendrobium_GLEAN_10138021	1.58597	3.09767	3.29659	2.90861	4.13992	2.4635	2.42482	2.2615
Dendrobium_GLEAN_10041058	76.4208	87.9435	103.212	75.8793	124.058	118.352	222.087	237.915
Dendrobium_GLEAN_10027856	0	0	0	0	0	0	0	0
Dendrobium_GLEAN_10054900	221.963	166.716	105.57	129.811	86.6974	175.484	77.6669	49.1892
Dendrobium_GLEAN_10128723	16.8212	20.9464	28.79	26.4318	25.5357	24.5307	43.3481	18.3248
Novel01231	0	0	0	0	0	0	0	0
Dendrobium_GLEAN_10000699	0.21533	0	0.635088	0	0	0.0964832	0	0
Dendrobium_GLEAN_10070785	0	0	0	0	0	0	0	0
Dendrobium_GLEAN_10119127	0	0	0	0	0	0	0	0
Dendrobium_GLEAN_10094855	0	0	0	0	0	0	0	0
Dendrobium_GLEAN_10073961	3.1933	8.91446	0.237434	19.6073	0.0936939	0	0.587445	30.8564
Dendrobium_GLEAN_10046712	0	0.334008	0	0	0	0	0	0.236044
Dendrobium_GLEAN_10103285	9.4809	5.89697	9.08878	6.52989	11.0199	13.4848	29.5594	19.1998
Novel01533	48.4698	79.3888	51.2539	87.5266	48.2483	72.6118	71.9167	106.584
Dendrobium_GLEAN_10036789	32.0644	26.3338	13.3274	23.3943	66.6755	39.995	26.5371	0.278039
Dendrobium_GLEAN_10077416	6.71907	10.518	10.8631	10.8469	6.31314	7.98164	4.72382	4.61225
Dendrobium_GLEAN_10065234	12.512	8.83374	5.41958	8.65833	7.93233	8.69755	12.1898	10.9049
Novel04861	1.76839	1.16776	0.203206	0.0826637	0.320749	0.504231	7.70899	6.2582
Dendrobium_GLEAN_10050471	11.5127	22.3005	7.90288	13.569	4.83913	5.21646	5.39388	7.6364
Dendrobium_GLEAN_10108934	2.20714	1.39769	3.5052	2.35711	5.92794	3.19508	0.53096	3.41356
Dendrobium_GLEAN_10103840	4.11478	2.42141	7.94436	2.62467	5.29992	5.55447	4.61523	6.50617
Dendrobium_GLEAN_10031577	31.4357	47.5473	38.8752	59.1637	25.3526	26.5245	34.0824	32.4258
Dendrobium_GLEAN_10054205	9.34408	11.3592	0.380126	5.6331	0.0642863	0.115498	0.0671774	6.28531
Novel02937	4.7532	5.17308	1.61042	6.34958	2.78637	7.59692	5.7212	7.79796
Dendrobium_GLEAN_10053005	9.36143	7.64393	8.42265	8.02764	8.53424	9.73143	17.746	14.3428
Dendrobium_GLEAN_10014458	17.6007	18.4671	21.4869	16.5341	31.5147	19.1598	16.2308	16.0721
Dendrobium_GLEAN_10020794	0.101478	0.196566	0.256538	0.208718	0.202465	0.181876	0.105785	0
Novel04893	1.18152	1.33504	1.82533	1.62008	1.27688	1.85291	1.53959	1.68477
Novel00012	0.669463	0	1.1988	0	0.500885	0.224975	1.04682	0
Dendrobium_GLEAN_10106545	28.4077	40.8914	25.2562	48.8469	28.3391	29.8365	14.4672	22.2421
Dendrobium_GLEAN_10034594	38.9577	37.867	42.5908	36.2689	40.8674	38.8884	15.8745	18.5438
Dendrobium_GLEAN_10048531	0.644419	0.291261	0.325822	0.309268	0.428575	0.423493	0.0447849	0.441074
Dendrobium_GLEAN_10122476	32.7622	33.8684	41.5572	41.7077	43.2792	45.8627	31.0612	36.7638
Dendrobium_GLEAN_10007467	0	0	0	0	0	0	0	0
Dendrobium_GLEAN_10036187	178.984	238.248	227.778	249.707	117.904	134.317	30.5634	41.2231
Dendrobium_GLEAN_10047359	0	0	0.0652597	0	0	0	0.0807308	14.3117
Dendrobium_GLEAN_10072817	14.504	14.3528	20.7246	17.1857	22.3326	20.3442	30.5681	52.3343
Dendrobium_GLEAN_10045817	0.521517	2.30902	0.125563	1.91545	0	0	0	0.956127
Dendrobium_GLEAN_10051222	0	0.096617	0.168127	0.30777	0.29855	0	0.103992	1.28024
Dendrobium_GLEAN_10031051	7.47202	7.40909	10.3255	17.4495	11.8243	10.303	18.3602	8.58082
Novel04054	9.79041	6.98687	9.29227	9.64447	11.4117	12.0983	10.206	15.3419
Dendrobium_GLEAN_10023892	0	0	0	0	0	0	0	0
Dendrobium_GLEAN_10051797	0.371728	1.08008	1.09636	0.764566	0	0	1.16252	1.90823
Dendrobium_GLEAN_10105381	0.636291	1.54065	0.268094	4.41692	0.634755	0.285104	0	0.544389
Dendrobium_GLEAN_10122013	0.343969	0.388664	0.144927	0	0	0.0513742	0.298809	0.343336
Dendrobium_GLEAN_10093512	20.8513	19.3355	22.2067	19.0709	21.4206	26.5576	24.0488	18.5988
Dendrobium_GLEAN_10107622	10.5943	13.563	4.41246	12.2726	2.91549	3.92853	5.58545	5.31343
Dendrobium_GLEAN_10096600	12.8048	17.7539	26.8621	16.703	26.5561	16.9103	13.6293	21.2187
Dendrobium_GLEAN_10077025	22.6989	24.7506	24.124	23.1209	22.7304	23.1919	19.2412	14.8846
Dendrobium_GLEAN_10122687	2.73753	11.6659	2.76823	12.2464	4.36947	0.122661	15.2675	2.57635
Dendrobium_GLEAN_10133934	21.1215	11.8518	25.0027	22.5831	34.337	38.106	15.0864	39.9183
Dendrobium_GLEAN_10030493	17.3086	1.57511	21.0463	2.26981	19.8163	24.5677	0.484385	0.496934
Dendrobium_GLEAN_10126984	0.980949	1.54386	1.8599	1.261	2.44645	3.51628	1.02259	1.15399
Dendrobium_GLEAN_10125809	0.447451	0.166678	0.261039	0.247776	0.480706	0.493513	1.29169	1.35461
Dendrobium_GLEAN_10112472	81.5879	88.4545	79.7834	92.0446	89.8944	80.4803	82.5124	106.008
Dendrobium_GLEAN_10086093	62.2737	55.6755	68.2384	62.9903	66.4274	67.2041	116.341	77.0063
Dendrobium_GLEAN_10073653	0	1.04915	1.00412	1.28112	0.648384	0.19415	1.41155	0.13902
Dendrobium_GLEAN_10095975	17.0375	18.0013	37.955	15.1639	43.758	32.5348	125.682	68.8022
Dendrobium_GLEAN_10095533	0	0	0	0	0	0	0	0
Dendrobium_GLEAN_10095431	0	0.0740312	0	0	0	0	0	3.20447
Dendrobium_GLEAN_10098286	28.8391	37.3196	34.6038	31.3717	37.1452	38.1559	75.2045	63.2352
Dendrobium_GLEAN_10032463	5.09508	5.95564	2.88701	4.60737	2.62902	4.72336	7.78389	1.87896
Dendrobium_GLEAN_10019347	0	0	0	0	0	0	0	0
Dendrobium_GLEAN_10027065	3.01831	1.09623	2.92497	1.0088	0.752754	0.811449	0.786607	2.06589
Novel03183	0.459023	0	0	0	0	0.575889	0.57421	1.64944
Novel02647	0	6.45433	0	3.33881	0	0	0.534386	4.23965
PEQU_13883-D2	14.0622	16.282	21.9179	16.7993	25.0505	18.571	14.604	5.97035
Dendrobium_GLEAN_10142804	0	0	0	0	0	0	0	0
Dendrobium_GLEAN_10009495	2.62803	2.943	18.2011	1.85807	6.96385	2.79667	2.65398	4.84823
Dendrobium_GLEAN_10020580	0.175402	0.792771	0.0492689	0.240509	0.58326	2.35777	0.182847	0.450203
Dendrobium_GLEAN_10099987	0	0	0.154992	0	0.366968	0	0.287603	0.0786813
Dendrobium_GLEAN_10007523	12.0133	9.29244	5.36739	10.6961	6.75623	14.3782	54.2113	20.7632
Novel03507	70.0102	99.5762	39.0701	52.4489	48.2181	46.6388	66.3363	39.0727
Dendrobium_GLEAN_10111608	8.68759	10.0026	12.6117	8.48624	14.1631	7.05042	8.78922	6.86274
Dendrobium_GLEAN_10046849	0.102657	1.32567	0.20185	0.950152	0.204819	0.214656	1.31985	1.55167
Novel00769	0	1.88703	1.23138	2.19154	1.21479	0	0	1.87533
Novel05142	48.1783	50.5802	64.2551	67.8541	70.3543	75.6392	61.0598	66.09
Dendrobium_GLEAN_10018185	1101.97	1004.09	1281.31	993.181	1079.85	1237.38	1790	2072.51
Dendrobium_GLEAN_10106518	0.220714	0.213765	0	0.680942	0	0.593372	0	0
Dendrobium_GLEAN_10107018	2583.91	1684.22	1501.27	1625.18	1229.64	1934.86	795.545	1270.3
Novel00620	1.64197	5.73881	0.721902	5.72652	0.28487	0.0639754	0	6.5965
Dendrobium_GLEAN_10027324	0.322996	0.72993	0.0907269	0.332167	0.107405	0.192966	0.112235	0.0921146
Dendrobium_GLEAN_10133355	0.786176	1.04953	1.89795	1.617	1.67454	1.98029	3.01239	4.23572
Dendrobium_GLEAN_10053960	2.07229	2.36448	1.8898	2.53985	1.61419	1.47548	2.60415	2.67162
Novel02793	1.1724	2.06453	1.43703	3.06903	4.14666	1.24166	4.22204	3.10039
Dendrobium_GLEAN_10009519	0	8.27221	6.85136	7.68567	7.12771	0.0735965	0.171224	0.562114
Dendrobium_GLEAN_10066192	0	0	0	0	0	0	0.0285374	0
Novel05095	0	1.71728	6.53689	1.36758	2.65322	0	0	5.68875
Dendrobium_GLEAN_10139641	1.78632	0.665417	1.04212	0.847865	0.959542	1.35452	1.50404	1.76344
Dendrobium_GLEAN_10050277	0	0	0	0	0	0	0	0
Dendrobium_GLEAN_10107929	16.6165	16.516	16.7179	16.8466	18.9874	15.2517	20.2263	19.0127
Dendrobium_GLEAN_10112681	7.82276	6.32095	5.98935	4.96484	8.11602	7.65124	2.93574	3.40381
Dendrobium_GLEAN_10090403	10.6872	23.1766	19.3821	23.8927	32.3318	15.8232	15.0159	32.2013
Dendrobium_GLEAN_10054005	18.9274	16.9782	12.9524	12.9983	14.9533	19.4091	9.26952	21.03
Novel01926	5.44333	4.53128	6.8994	9.92354	4.82434	14.1099	2.69651	21.1495
Dendrobium_GLEAN_10011425	0	0	0	0	0	0	0.0652717	0
Dendrobium_GLEAN_10070549	461.361	408.88	522.276	389.806	403.782	521.285	618.834	480.996
Dendrobium_GLEAN_10030820	39.7549	10.7523	17.3739	13.8091	22.7828	41.311	32.9556	9.67921
Novel01741	1.90068	5.04232	2.50695	5.43904	4.12195	4.96174	10.8544	4.03005
Dendrobium_GLEAN_10095089	1.73553	2.33863	3.62442	2.25041	2.63464	2.2991	0.235982	3.48618
Dendrobium_GLEAN_10115987	0.525509	0.86524	0.885667	0.270215	0.157272	0.141279	0.0547816	0.404646
Dendrobium_GLEAN_10031538	0.815839	5.53108	0.196425	4.9741	0.465068	0.26111	0.0607479	2.49287
Dendrobium_GLEAN_10043491	2.27269	5.86972	2.06246	5.21381	0.697602	0.939995	3.82712	0.598289
Dendrobium_GLEAN_10128677	14.1721	4.50032	14.9771	3.34498	13.4426	7.59932	3.51179	6.55953
Dendrobium_GLEAN_10013975	8.80537	4.98224	6.36565	3.86046	1.61812	0.913678	2.22232	0.95161
Dendrobium_GLEAN_10028207	0	0	0	0	0	0	0	0
Dendrobium_GLEAN_10018791	2.5522	5.7004	2.15068	6.74916	3.16956	2.9406	1.57461	8.46694
Novel02320	13.712	16.4706	19.5269	20.3249	20.5183	20.3197	26.3522	14.8446
Dendrobium_GLEAN_10077127	7.70415	13.3704	4.86031	9.0364	3.09499	3.17211	0.976766	8.21254
Dendrobium_GLEAN_10089506	0	0	0	0	0	0	0	0
Dendrobium_GLEAN_10079183	140.543	138.301	146.576	129.93	150.622	157.492	149.211	128.119
Dendrobium_GLEAN_10073794	68.6748	50.1393	78.0051	57.4889	80.6517	73.9989	92.3464	94.8193
Dendrobium_GLEAN_10100208	0	0	0	0	0	0	0	0
Dendrobium_GLEAN_10087360	4.89583	2.79838	3.99033	5.365	0.56046	0.503467	0.0836664	1.16734
Dendrobium_GLEAN_10090383	4.49623	15.9218	11.6429	21.2411	8.55025	2.60223	3.17355	6.01066
Novel05746	20.8305	14.4743	15.0849	17.4332	8.25254	8.14253	5.48523	30.26
Novel04570	5.20868	2.95067	0	3.23416	0	4.93192	3.5857	1.68165
Dendrobium_GLEAN_10134945	31.5929	11.8053	23.0388	35.0282	22.0465	11.8419	11.994	22.6115
Dendrobium_GLEAN_10068098	1.13917	4.28006	2.81364	3.29236	2.09649	1.76009	5.09816	1.36112
Dendrobium_GLEAN_10085193	0.403591	5.86327	6.63188	8.09348	4.52943	0.180837	0.315542	4.2299
Dendrobium_GLEAN_10009226	4.93493	9.73453	13.2387	11.9194	13.1431	11.5226	13.8286	9.10282
Dendrobium_GLEAN_10032929	2.50311	2.22774	1.45372	1.98282	2.05839	1.87939	1.05785	1.36019
Dendrobium_GLEAN_10033081	128.427	112.59	164.404	93.0732	134.147	104.956	158.768	165.989
Dendrobium_GLEAN_10133299	0	0	0	0	0	0	0	0
Dendrobium_GLEAN_10092613	10.8948	6.91325	6.80645	8.11335	3.56037	5.55497	8.22423	4.82132
Dendrobium_GLEAN_10083442	2.09678	4.20405	2.32488	3.78301	2.89904	1.91198	1.91736	2.29749
Dendrobium_GLEAN_10080274	0.686665	0.475034	20.3349	0.302641	1.27215	0.263721	0	0
Dendrobium_GLEAN_10085482	0	0	0	0	0	0	0	0
Dendrobium_GLEAN_10031172	0.0644419	0	0	0	0	0	0	0
Dendrobium_GLEAN_10077154	9.04743	14.6986	13.4036	14.4067	13.9751	12.554	12.626	16.7298
Dendrobium_GLEAN_10136318	78.7527	48.694	48.938	39.0459	46.551	44.799	78.3717	114.672
Dendrobium_GLEAN_10002952	8.67818	15.5201	3.43923	13.8729	0.728578	0.307995	0.17914	7.9761
Dendrobium_GLEAN_10031027	7.26219	6.344	11.0394	7.02908	9.51748	11.1018	4.75009	0
Dendrobium_GLEAN_10033085	0.468453	0.767809	1.21463	0.889394	1.90524	1.51774	2.36656	1.38736
Dendrobium_GLEAN_10045347	0	0	0	0	0	0	0	0
Dendrobium_GLEAN_10044252	25.7876	22.0327	33.2187	21.4523	7.04578	9.56755	7.79071	13.842
Dendrobium_GLEAN_10035939	1.13917	1.76104	4.81821	1.84739	4.58937	1.25644	5.32102	4.29213
Dendrobium_GLEAN_10135906	8.16574	6.52208	12.7791	6.16188	11.214	9.26587	11.2208	9.70827
Dendrobium_GLEAN_10067077	0.722805	2.83353	0.377056	2.30078	0.480706	0.215912	0.466444	1.50185
Dendrobium_GLEAN_10090975	20.9053	30.4918	24.7051	36.2313	22.1842	25.7501	62.9471	32.8502
Dendrobium_GLEAN_10112574	0	0	0	0	0	0	0	0
Novel04111	51.52	67.624	70.5234	94.6893	72.2273	52.0939	49.7567	87.6057
Dendrobium_GLEAN_10032483	0	1.27038	0.573912	1.5305	0.654251	0	0.0788855	0.172649
Dendrobium_GLEAN_10057837	18.6957	16.8726	24.8252	20.9745	23.4545	20.6041	34.254	40.7157
Dendrobium_GLEAN_10113546	0	0.111047	0	0	0	0.102748	0	0
Dendrobium_GLEAN_10081976	0.633844	0.438492	0.381518	1.30368	0.361322	0.689731	4.81404	1.58815
Dendrobium_GLEAN_10058870	13.5185	18.824	20.675	19.5975	20.0632	15.632	16.54	17.3693
Dendrobium_GLEAN_10062971	11.0948	11.311	6.13914	11.181	5.93621	11.8363	7.15974	5.99514
Dendrobium_GLEAN_10075323	9.93211	2.06131	12.2886	3.8911	1.88726	6.35755	0.164345	0.674411
Dendrobium_GLEAN_10101085	76.0684	63.7165	68.219	62.393	67.7903	75.8111	50.1736	56.8773
Dendrobium_GLEAN_10068667	0.935475	1.9253	0	0.481019	0	0.733528	0.243796	0.100045
Dendrobium_GLEAN_10082544	0.0878462	1.02097	0.518181	0.632384	0.0876341	0.472336	0.366301	3.38212
Dendrobium_GLEAN_10140011	8.82854	9.47144	7.55406	11.8728	8.12974	6.81617	12.4599	7.08858
Dendrobium_GLEAN_10014287	0	0	0	0	0	0	0	0
Dendrobium_GLEAN_10035786	0.06638	0.514322	0	0.750913	0	0	0	0.170377
Dendrobium_GLEAN_10006523	22.7949	14.5187	28.9912	15.6504	26.665	34.3857	46.847	36.9463
Dendrobium_GLEAN_10101336	0	0.283445	0	0	0	0	0	0
Dendrobium_GLEAN_10138107	84.9428	64.1771	69.8892	75.1008	59.081	82.147	23.7359	40.1054
Novel01058	0.0558769	3.62589	2.44848	2.75825	2.34116	0.0500736	0.116498	2.05567
Dendrobium_GLEAN_10005369	28.716	18.0013	26.1561	17.3939	31.2425	15.8232	7.07201	3.73695
Dendrobium_GLEAN_10065689	123.488	130.446	100.474	109.68	146.502	90.3564	86.5072	106.386
Novel01769	0	1.51193	0	1.82235	0	0	0	0
Dendrobium_GLEAN_10125421	0	0	0	0	0	0	0	0
Dendrobium_GLEAN_10095020	1.13186	1.53472	1.71683	1.3968	1.91952	2.02862	0.471964	0.968385
Novel01419	3.08728	3.61958	3.83391	1.83813	2.91773	5.6789	2.71018	4.72667
Dendrobium_GLEAN_10083436	2.10921	3.03503	2.38677	2.66489	2.4047	1.94415	0.628212	1.85613
Dendrobium_GLEAN_10029274	0.923917	4.673	23.0109	6.86221	14.3373	1.01195	2.56836	8.69519
Dendrobium_GLEAN_10046439	0	0	0	0	0	0.153624	0	0
Dendrobium_GLEAN_10050678	0	0.116335	0.303657	0	0.119826	0	0	0.102767
Dendrobium_GLEAN_10096124	5.81189	15.4393	1.25937	5.6923	0.0552177	0.0992053	0.115402	4.87774
PEQU_17157-D2	5.99675	4.67863	6.31665	4.62527	9.47192	4.62755	1.56283	8.4085
Novel04641	1.35264	2.81029	0.836496	2.31094	0.870566	0.752712	6.57271	1.72658
Dendrobium_GLEAN_10057027	0.082126	0.676094	0.346028	0.464519	0.204819	0.0367983	0.21403	1.33502
Dendrobium_GLEAN_10106198	0	0	0	0	0	0	0	0
Dendrobium_GLEAN_10104947	46.22	37.4718	30.4878	37.118	26.3353	37.8517	38.3471	43.0988
Dendrobium_GLEAN_10075521	9.45542	15.3304	12.5021	14.8813	13.2369	12.9676	17.4264	10.0116
Dendrobium_GLEAN_10037923	0.0564124	0	0	0.0580142	0	0	0	0
Dendrobium_GLEAN_10003568	0	0	0	0	0.064998	0	0	0
Novel00534	5.68405	5.47194	6.14597	5.9863	5.90944	7.45646	7.06757	11.4839
Dendrobium_GLEAN_10035218	14.8285	5.313	9.53425	10.8422	10.4319	21.5073	30.7373	8.87341
Dendrobium_GLEAN_10079100	11.2726	7.14966	8.32227	6.36059	10.3497	10.9064	8.83933	8.70561
Novel02240	2.41623	6.00042	7.98779	7.58195	8.71452	2.44289	0.710431	0.636076
Dendrobium_GLEAN_10131114	2.47819	5.77541	11.9425	10.9906	5.4852	4.37221	4.92458	31.0087
Dendrobium_GLEAN_10026586	0	0	0	0	0	0	0	0
Novel05508	1.77775	2.98621	0.351109	5.05618	0.193971	0.42317	1.36095	1.68734
Dendrobium_GLEAN_10102412	3.98708	5.99921	3.35982	4.68605	3.12514	3.63679	6.82826	0
Dendrobium_GLEAN_10096787	13.5513	11.7226	13.2993	12.8378	13.1161	16.0997	11.5289	12.386
Dendrobium_GLEAN_10137870	1.26122	1.32331	0.974234	1.83746	0.943631	0.94186	2.30083	2.5178
Dendrobium_GLEAN_10098436	0	0	0	0	0	0	0	0
Dendrobium_GLEAN_10060522	9.74184	27.5192	25.2262	30.9946	31.3821	12.9132	3.49091	9.81074
Dendrobium_GLEAN_10053712	6.79821	2.47459	1.15343	2.48682	1.54752	3.80249	3.04399	3.47417
Dendrobium_GLEAN_10122791	21.693	24.0231	23.1454	24.6436	25.7506	26.5479	26.1199	21.5811
Dendrobium_GLEAN_10144000	0.326983	0.696716	0.0551082	0.201761	0.130477	0.234418	0.681726	0.839267
Dendrobium_GLEAN_10130506	0	0	0	0	0	0	0	0
Dendrobium_GLEAN_10088584	0	0	0	0	0	0	0	0
Dendrobium_GLEAN_10093748	43.5677	41.8685	45.7208	43.8307	42.99	52.2592	31.1008	33.6864
Dendrobium_GLEAN_10037140	19.2401	21.347	16.5211	24.6704	17.0071	27.3906	19.0413	30.8387
Dendrobium_GLEAN_10109475	2.60514	3.36417	0.304902	2.2326	0	0.518795	0.528059	2.78609
Dendrobium_GLEAN_10003849	0.157653	0.152689	1.19565	0	3.30271	0.565116	0	0
Novel02380	19.7421	21.0137	15.3184	20.5036	13.8446	16.2904	17.1161	26.0885
Dendrobium_GLEAN_10056217	37.6511	33.3012	34.9005	41.7466	36.7399	42.2535	31.9409	32.3056
Dendrobium_GLEAN_10105049	4.83935	8.99397	9.58882	8.20493	7.17626	5.04	5.04478	3.91658
Dendrobium_GLEAN_10047878	0.423558	1.38451	0.691537	1.4701	0.845071	0.996366	2.92519	2.0837
Novel04216	0	3.79358	2.35762	4.98718	2.60495	0.167147	0	6.064
Novel04856	0	0.741382	6.57954	0	2.13817	2.60672	1.59595	0.523935
Dendrobium_GLEAN_10072144	0	0	0	0	0	0	0	0
Dendrobium_GLEAN_10005614	33.4223	17.8785	25.2174	25.528	20.7027	19.3167	30.2394	25.554
Dendrobium_GLEAN_10102481	9.18292	11.2516	6.69954	10.7746	7.28556	7.40075	7.29197	11.073
Dendrobium_GLEAN_10010445	7.09368	37.8616	0	32.8279	0	10.2264	119.442	0.0659686
Novel02122	19.8226	15.1114	46.1349	16.1599	45.4209	29.6562	32.9351	29.596
Dendrobium_GLEAN_10113812	1.68894	1.67294	1.16446	1.83558	1.18706	1.75432	2.02073	1.51068
Dendrobium_GLEAN_10127812	3.8637	6.13698	3.22329	4.25154	3.77728	3.39317	7.53181	6.47907
Dendrobium_GLEAN_10140793	14.5649	17.2748	12.4623	16.9141	13.4567	12.8915	8.03537	11.1576
Dendrobium_GLEAN_10010556	34.4967	95.3234	24.2476	95.1637	21.2026	37.3604	36.1315	37.767
Dendrobium_GLEAN_10004677	0	0	0	0	0	0	0	0
Novel00020	38.7705	49.1205	78.2583	53.0845	89.4964	38.1778	26.5525	47.2489
Dendrobium_GLEAN_10098694	0	0	1.0713	0.145268	0.704578	0	0	0
Dendrobium_GLEAN_10054910	55.4113	19.1207	15.9634	14.8735	4.07168	11.0127	0.462478	10.9695
Dendrobium_GLEAN_10133366	0	0	0	0	0.286414	0.128644	0	0.12282
Dendrobium_GLEAN_10016813	0	0.600042	0	0	0	0	0	0
Dendrobium_GLEAN_10098455	0	0.53027	0	1.97068	0	0	2.99643	1.99082
Novel05498	10.6239	27.5478	13.8567	16.0619	8.48702	8.00329	27.6651	13.2177
Dendrobium_GLEAN_10104212	0.593969	0.0174324	0.151674	0.0555304	0.0538668	0.0322594	0.54413	0.0461982
Dendrobium_GLEAN_10088429	0.173109	0.419147	0.948185	1.78024	0.345381	0.232695	0.270685	0.370265
Dendrobium_GLEAN_10136451	0	0	0	0	0	0	0.071068	0
Dendrobium_GLEAN_10048472	1.09129	2.15615	1.10353	1.25695	1.37171	0.80192	0.750826	1.32581
Dendrobium_GLEAN_10061410	4.67574	5.48192	12.2352	5.37794	20.3149	9.53806	3.65567	1.21065
Dendrobium_GLEAN_10111677	13.0153	20.1865	1.91742	11.232	1.81592	1.38657	1.04367	7.47553
Dendrobium_GLEAN_10126247	7.06284	6.78676	8.6315	6.78803	9.18533	6.41214	9.36713	8.11496
Dendrobium_GLEAN_10046560	31.8248	44.056	33.2657	48.7252	49.9495	38.0135	42.9926	79.6704
Dendrobium_GLEAN_10108339	0	0	2.44848	0	4.68232	0	0	0.956127
Dendrobium_GLEAN_10057777	15.5018	15.8969	21.0963	19.693	18.8549	14.6346	14.5179	21.5609
Dendrobium_GLEAN_10097614	40.9866	46.4294	37.3058	56.9754	26.0387	33.2135	12.1822	17.5151
Dendrobium_GLEAN_10123492	23.8285	23.7425	21.3798	23.8881	18.6405	26.8842	29.5757	23.6869
Dendrobium_GLEAN_10111576	29.4018	37.878	31.7782	44.9442	33.1566	32.1477	15.908	28.3338
Dendrobium_GLEAN_10108065	4.45886	3.7139	4.65915	5.77769	6.13837	6.71289	4.46221	1.37335
Dendrobium_GLEAN_10121189	32.7175	28.3344	37.1105	27.9142	36.8522	38.7204	62.5464	33.1165
Dendrobium_GLEAN_10041499	1.16224	2.208	0.414358	1.83883	0.713497	0.120177	0.139797	1.91225
Dendrobium_GLEAN_10021663	0	0.374479	0	0.265087	0	0	0	0
Dendrobium_GLEAN_10144924	47.9014	51.8116	8.24986	30.8334	2.87761	1.95832	1.73132	1.49572
Dendrobium_GLEAN_10049064	0	0	0	0	0	0	0	0
Novel05411	3.25184	2.31477	3.41408	3.45382	3.11104	3.82975	4.4087	4.64454
Novel00581	0	0.466397	0	1.32061	0	0	1.84066	1.37335
Novel01262	0.458626	1.74502	0.0828156	0.80854	0.0653597	0.469707	1.12694	0.672659
Dendrobium_GLEAN_10093021	8.41035	4.95035	6.57818	3.96619	5.70152	8.53623	3.43913	5.72468
Dendrobium_GLEAN_10116220	34.5098	39.9152	65.6493	72.9095	54.066	38.374	14.2541	18.9736
Dendrobium_GLEAN_10004447	62.0846	67.1439	96.4749	79.5792	95.6213	70.3661	53.9475	87.7169
Novel03613	1.63569	0.487445	0.636166	1.16456	0.502074	1.57857	0.786981	1.72239
Dendrobium_GLEAN_10011202	29.5323	7.06448	14.8792	6.49496	18.4575	22.0409	18.9166	21.6138
Novel03144	0.257142	0.0830156	0.274471	0.193925	0.23942	0.184349	1.6977	1.39335
Dendrobium_GLEAN_10059218	0	0	0	0.140763	0	0	0	0
Dendrobium_GLEAN_10085156	37.6543	44.2983	50.3742	40.6924	43.5056	41.7505	20.1807	30.5776
Dendrobium_GLEAN_10042776	11.0651	12.3585	12.2605	14.4299	11.9778	13.8823	8.88426	3.9882
Novel02521	8.284	5.48169	3.12182	5.92641	3.10541	7.72334	4.61283	2.20109
Dendrobium_GLEAN_10126224	8.42418	9.20332	11.3582	12.3367	14.2529	13.3471	48.7564	18.8547
Dendrobium_GLEAN_10020695	0.990117	1.67816	1.80775	1.27279	1.64621	0.221821	1.89227	3.10607
Dendrobium_GLEAN_10095349	0.722805	0.600042	0.73961	0.21238	0.412034	0.971603	0.753487	0.618407
Novel04105	0.240778	1.10769	0.963767	1.05236	1.14094	0.107886	0	2.36902
Dendrobium_GLEAN_10121571	15.4384	25.5891	16.8579	21.2577	14.0916	10.8692	15.9203	19.4253
Dendrobium_GLEAN_10094103	0.0695161	0.336638	0.702955	0.35745	1.24827	0	0	6.12599
Dendrobium_GLEAN_10118887	31.0789	33.0469	11.9134	15.0911	33.8007	39.3443	53.2299	15.4641
Dendrobium_GLEAN_10100149	190.264	204.861	129.957	134.458	136.857	220.217	1240.64	161.422
Dendrobium_GLEAN_10078161	11.5069	15.7562	3.09287	12.1396	0.692703	1.33342	0.206816	7.21392
Dendrobium_GLEAN_10056191	168.552	161.229	261.978	189.276	266.063	185.457	244.993	284.061
Dendrobium_GLEAN_10090860	0	0	0	0	0	0	0	0
Dendrobium_GLEAN_10032526	89.6694	101.683	106.608	103.994	109.4	99.8575	92.7793	97.0918
Dendrobium_GLEAN_10061941	47.0596	45.2768	40.9014	51.0356	48.3427	54.0221	82.627	68.6794
Dendrobium_GLEAN_10077531	0	0	0	0	0	0	0	0
Dendrobium_GLEAN_10028773	12.9593	7.6877	7.23485	4.16478	9.21122	14.2264	2.70189	9.42443
Novel03211	0	0	0	0	0	0	0	0
Dendrobium_GLEAN_10032440	0.275892	0	0	0	0	0	0	0.118022
Novel05009	4.658	1.3639	0.27385	1.44822	0.108064	8.15431	0	0
Dendrobium_GLEAN_10064133	4.36467	15.9483	8.02474	12.0376	5.14579	5.51147	1.2409	5.09218
Dendrobium_GLEAN_10033375	1078.81	654.406	608.857	602.457	452.887	560.776	288.534	414.732
Dendrobium_GLEAN_10041990	9.03117	11.8867	11.0253	11.1928	9.87564	8.92327	6.75915	13.4228
Dendrobium_GLEAN_10061228	50.9293	37.4598	118.123	79.7984	134.205	96.7694	30.6777	172.238
Novel02238	11.0923	15.0549	5.34125	18.7017	5.87148	13.0508	12.979	10.4586
Dendrobium_GLEAN_10109713	0.0584672	0.226506	0.0985378	0.390828	0.058326	0.10479	0.060949	0.500225
Dendrobium_GLEAN_10137874	0	7.19337	6.49489	6.34105	2.93574	0	2.62952	3.11728
Dendrobium_GLEAN_10052982	10.6814	14.6381	3.85757	6.94953	4.20427	2.21395	0.833221	4.28959
Dendrobium_GLEAN_10022755	0	0	0	0	0	0	0	0
Novel00646	37.6401	23.7006	21.0352	20.3146	19.1177	36.5491	19.5677	15.8075
Dendrobium_GLEAN_10067429	67.5124	58.3453	58.3134	63.154	53.75	78.9999	46.5579	66.7587
Dendrobium_GLEAN_10025971	9.14283	6.86262	19.7426	11.6943	22.5168	10.4464	17.8109	13.8846
Dendrobium_GLEAN_10128773	7.12947	10.5189	4.54798	10.8265	5.51698	3.40349	4.23699	6.78381
Dendrobium_GLEAN_10031899	13.5464	15.1106	11.8089	13.9311	14.8185	14.3163	21.7179	21.8209
Dendrobium_GLEAN_10052530	96.0622	100.323	63.8678	105.542	69.5039	105.964	44.2556	68.8259
Dendrobium_GLEAN_10135687	3.78104	5.86632	5.87744	4.60568	9.26498	6.15166	2.25778	10.7098
Dendrobium_GLEAN_10096135	6.9774	41.3739	77.9959	37.0491	77.9865	10.3362	12.0237	31.3101
Novel04357	27.1052	25.1268	31.4552	26.6005	32.2931	33.0345	36.6518	15.5706
Dendrobium_GLEAN_10071098	4.06147	7.50053	4.26363	5.87583	3.02158	3.57797	5.45381	4.12271
Dendrobium_GLEAN_10091994	0	0	0	0	0	0	0	0
Dendrobium_GLEAN_10067323	0	0	0	0	0	0	0	0
Novel02205	20.7039	18.9855	21.8084	21.0653	15.7102	22.6986	17.5647	8.95102
Dendrobium_GLEAN_10116806	35.1755	45.3943	44.9687	46.3231	50.9989	41.7328	134.243	74.7826
Dendrobium_GLEAN_10025308	0	0	0	0	0	0	0	0
Dendrobium_GLEAN_10063313	17.3967	56.7013	10.2706	36.9597	1.299	2.56719	2.17187	26.5594
Dendrobium_GLEAN_10071777	15.6676	10.7184	15.927	16.2403	18.1106	18.8319	19.4436	38.9372
Dendrobium_GLEAN_10057533	29.8326	33.0283	26.1608	29.8124	26.1325	27.301	17.9671	25.5688
Dendrobium_GLEAN_10062989	20.945	26.7722	24.6277	26.2984	29.0335	20.4065	21.961	28.9634
Dendrobium_GLEAN_10082613	0	0	0	0	0	0	0	0
Dendrobium_GLEAN_10017108	175.82	188.356	210.419	219.576	144.413	153.295	109.004	147.425
Dendrobium_GLEAN_10126176	0.173109	0	0	0	0	0.193912	0.135343	4.77642
Dendrobium_GLEAN_10081570	12.875	16.3887	6.35466	20.9957	5.13755	21.4273	34.7041	11.6448
PEQU_07478-D25	0	0	0	0	0	0	0	0
Novel03166	6.67966	7.4473	5.95605	8.6266	5.8887	6.61235	5.9916	7.17684
Novel03008	3.31631	1.82297	3.54986	4.14787	2.50358	1.44578	2.7096	2.37721
Dendrobium_GLEAN_10048329	11.6061	9.22312	7.5232	13.1598	8.41139	14.4898	3.30905	8.48697
Dendrobium_GLEAN_10022156	1.26122	1.58797	0.850241	3.76139	2.51635	2.03442	0.657379	2.37393
PEQU_03634-D54	0	0	1.83295	0.263166	1.65933	0.229322	0	0.218939
Dendrobium_GLEAN_10032039	0	0	0	0.363169	0	0	0	0.805696
Dendrobium_GLEAN_10007547	0	0	0	0	0	0	0	0
Dendrobium_GLEAN_10070058	18.2115	20.1166	19.5155	23.6411	26.5068	22.0914	18.7623	26.893
Dendrobium_GLEAN_10107058	110.435	94.8156	98.6958	96.272	85.675	135.387	57.9427	80.2716
Dendrobium_GLEAN_10033989	46.5066	47.0984	47.3208	47.9264	46.2981	38.9961	74.0288	53.3278
Dendrobium_GLEAN_10027419	16.3755	19.1584	14.3692	16.9503	18.5615	15.8871	27.7212	31.3507
Dendrobium_GLEAN_10116120	0	0	0	0	0	0	0	0
Dendrobium_GLEAN_10042467	34.285	48.7182	30.6528	49.8779	33.4642	35.0475	26.5538	29.3331
Dendrobium_GLEAN_10036320	0	0	0	0	0	0.140651	0	0.134283
Dendrobium_GLEAN_10026140	34.7166	42.3058	17.8551	34.1379	17.4519	28.4332	8.66527	31.794
Dendrobium_GLEAN_10076097	21.044	31.7531	21.6529	24.5673	12.3436	12.6262	4.14266	5.75681
Novel02579	5.35408	5.90267	7.29561	10.6608	3.75017	2.60318	1.90004	4.48331
Dendrobium_GLEAN_10110406	2.38751	2.38858	5.85883	4.15513	3.32397	1.55176	1.53161	3.2997
Dendrobium_GLEAN_10050447	0.0268753	0.104117	0.181178	0.165831	0.294915	0.192673	0.588339	0.183949
Novel01435	83.5171	77.4059	88.0465	77.0463	88.3565	84.9138	105.932	87.2638
Dendrobium_GLEAN_10122629	1.59665	0.636747	0.395724	0.869288	0.187388	1.59916	0	0.241066
Dendrobium_GLEAN_10065998	0.437779	0.141332	0	0	0.145574	0.261541	0	0
Dendrobium_GLEAN_10060018	5.45471	4.81338	8.92072	4.94475	8.54522	4.77956	43.5946	8.95346
Dendrobium_GLEAN_10060836	48.0377	34.6425	30.0866	33.1792	32.6385	46.7135	23.8542	28.353
Dendrobium_GLEAN_10100784	1.9619	3.37802	3.49019	5.82864	4.78417	2.53953	5.9083	5.59511
Dendrobium_GLEAN_10052012	80.6215	65.494	115.678	70.1612	126.149	93.9632	220.135	124.936
Novel04075	0	1.13066	0.122969	0.675314	0.072787	0	0	0.0624248
Dendrobium_GLEAN_10072181	1.1877	1.38037	1.66807	0.081428	1.81674	1.70295	1.89844	1.01615
Dendrobium_GLEAN_10076696	14.468	15.2066	17.5408	15.6961	17.3705	18.5442	39.7872	20.3807
Novel04355	0.202955	1.17939	1.28269	2.19154	0.101232	0	0.105785	2.34416
Dendrobium_GLEAN_10026277	2.14249	3.64921	2.80152	2.88712	3.02172	5.4951	2.61851	2.02267
Dendrobium_GLEAN_10006638	0	0	0	0.128783	0	0	0.522173	0
Dendrobium_GLEAN_10102249	0	0	0	0	0	0	0	0
Dendrobium_GLEAN_10089885	22.541	16.9193	24.8514	21.4424	41.4127	18.6849	14.6861	9.16051
Novel04737	0.0477649	0.138783	0.140876	0.319287	0.0714743	0.0642061	0.174274	0.531258
Dendrobium_GLEAN_10099943	7.27758	15.8302	8.41145	15.0911	10.7908	8.83821	14.0537	18.169
Dendrobium_GLEAN_10091875	12.1217	6.03971	8.23671	7.56602	9.22661	9.70116	10.372	6.68416
Dendrobium_GLEAN_10078281	31.6085	29.353	36.1525	33.2432	34.6788	46.0465	34.7898	30.4684
Dendrobium_GLEAN_10051449	0	0	0	0	0	0	0	0
Dendrobium_GLEAN_10099615	0.387005	0.140558	0.40765	0.547241	0.675623	0.65027	1.10944	0
Dendrobium_GLEAN_10068954	0	0	0	0	0	0	0	0
Dendrobium_GLEAN_10024205	1.77227	0.635733	5.25474	1.48508	2.68473	2.70583	3.07917	5.39127
Novel02482	3.3389	0.262199	0	0.092803	0	7.76337	4.51542	0.308827
Dendrobium_GLEAN_10014068	3.6595	1.86075	2.00445	3.66932	13.2337	2.37759	13.1612	1.4872
Dendrobium_GLEAN_10006562	4.76146	3.79493	5.22444	1.88725	2.5729	4.26694	3.36076	5.43166
Novel01572	0.993211	0.641295	3.8128	0.624197	1.92658	1.23619	0.287603	0.896966
Dendrobium_GLEAN_10052059	11.7714	26.059	11.2275	19.3557	10.9042	7.6508	2.76436	17.929
Novel03893	20.1115	20.117	16.9475	22.7169	19.0762	20.5834	14.7788	21.6259
Novel03565	5.64191	2.64541	4.26378	3.40759	3.79686	8.34633	1.86711	0.612956
Dendrobium_GLEAN_10123142	20.7906	29.0961	18.1065	23.8873	21.8816	22.5983	22.9694	20.1708
Dendrobium_GLEAN_10071948	11.9596	9.19687	31.3588	11.8241	18.6897	14.4433	11.3436	11.9888
Dendrobium_GLEAN_10128725	154.084	173.696	171.044	168.067	176.618	172.211	110.44	138.4
Dendrobium_GLEAN_10068577	5.32515	10.9258	7.85292	11.9615	11.044	7.72325	34.0376	26.0772
Dendrobium_GLEAN_10094818	1.91802	2.73182	2.04411	4.17702	3.37657	1.92103	3.76365	2.75108
Novel04611	0	0	0	0	0	0	0	0
Dendrobium_GLEAN_10046354	0.923917	2.13765	1.81665	1.66277	2.43223	2.0239	5.48453	4.25977
Dendrobium_GLEAN_10037501	3.59513	5.90609	5.25374	4.44601	3.72264	3.34409	0.759036	3.50415
Dendrobium_GLEAN_10082095	0.466414	0.193599	2.07747	0.959314	2.06056	0.537393	1.66701	1.19714
Dendrobium_GLEAN_10015180	0.0580825	0	0	0.0597317	0	0	0	0.298161
Dendrobium_GLEAN_10068150	0	0	11.0444	0	18.704	0	0	0
Novel04556	0	0	0.0907269	0	0	0	0	0
Dendrobium_GLEAN_10097014	98.0736	90.8502	108.157	87.881	123.014	89.9517	113.891	129.516
Dendrobium_GLEAN_10066854	12.1392	35.0337	25.0053	34.5515	33.0271	21.6471	14.0606	17.6246
Dendrobium_GLEAN_10093540	38.8456	65.0823	87.4047	59.9748	113.437	43.5817	104.865	91.9357
Dendrobium_GLEAN_10055094	2.45237	0.237517	0.103328	0.189151	0	1.53837	0.575207	2.09817
Dendrobium_GLEAN_10005355	0	0.0842424	2.27219	0.178901	2.60312	0	0	0
Dendrobium_GLEAN_10087703	14.005	14.8559	24.2991	16.1989	21.2577	14.7133	17.3141	16.3295
Dendrobium_GLEAN_10086277	0	0	0	0	0	0	0.0870975	0
Dendrobium_GLEAN_10139580	0	0	0	0	0	0	0	0
Dendrobium_GLEAN_10021187	3.85075	4.63916	5.77757	4.53961	4.21622	4.54498	20.8543	7.87482
Dendrobium_GLEAN_10139625	4.02092	4.74093	8.5445	3.50584	9.67922	5.32664	6.46965	0
Dendrobium_GLEAN_10112873	35.1364	33.1695	34.1523	38.9371	38.6572	55.9123	40.7663	37.0573
Dendrobium_GLEAN_10073490	18.3681	19.3967	0.699023	24.3738	0.709307	2.65491	1.85301	43.901
Dendrobium_GLEAN_10093057	56.5741	69.3165	39.3041	94.6309	43.0647	114.224	53.6972	14.1349
Dendrobium_GLEAN_10077363	7.67699	16.9618	5.86273	13.4708	8.04138	8.94357	40.9147	13.4237
Dendrobium_GLEAN_10123022	16.5686	24.5976	23.4399	29.2276	22.8023	26.336	25.4667	23.6949
Dendrobium_GLEAN_10097133	36.9578	59.8087	41.7884	65.7278	45.7226	35.5602	38.9672	46.0436
Dendrobium_GLEAN_10073846	5.70625	5.8742	5.35289	5.01941	5.83568	5.78899	7.89389	24.9938
Dendrobium_GLEAN_10119720	0	0	0	0	0	0	0	0
Dendrobium_GLEAN_10004786	9.84722	12.8259	19.0282	16.0632	19.4775	14.4539	24.2472	15.9783
Dendrobium_GLEAN_10030784	33.7984	22.4181	12.3936	9.39521	8.05115	10.353	30.9624	21.8365
Dendrobium_GLEAN_10072299	0	0	0	0	0	0	0	0
Dendrobium_GLEAN_10031396	2.30746	3.01214	1.09903	3.50788	2.10172	1.70819	0.522915	2.66086
Dendrobium_GLEAN_10090205	0	0	0	0	0	0	0	0
Dendrobium_GLEAN_10058081	0	0	0.0592797	0.0723444	0	0.0630408	0	0
Dendrobium_GLEAN_10098640	0.58988	0.152349	0.729048	0.242652	1.17691	0.563857	0.368952	0.874781
Dendrobium_GLEAN_10135130	2.65806	1.71625	1.9199	1.49693	1.57836	1.87157	1.71531	2.70731
Dendrobium_GLEAN_10050408	0.0205554	0.11945	0	0.0634172	0	0.0184205	0.0428559	0.0527595
Dendrobium_GLEAN_10007203	20.5159	31.8408	22.248	30.6964	21.8084	25.92	14.9006	33.4508
Dendrobium_GLEAN_10068785	25.9123	18.878	19.8261	19.9035	13.2223	16.9329	1.76895	4.55166
Dendrobium_GLEAN_10053051	0	0	0	0	0	0	0	0.137335
Dendrobium_GLEAN_10068335	30.8283	133.482	15.8443	71.9467	2.95161	0.940842	3.58183	18.2098
Dendrobium_GLEAN_10020993	0.525956	0	0.633158	0	0.524686	0.336665	0.861586	1.2214
Novel03459	0.875002	0	0.397031	0	0.335726	0.0603173	0	0
Dendrobium_GLEAN_10040422	0.435977	8.02279	2.43394	6.16491	3.69686	1.22093	0.340863	0
Dendrobium_GLEAN_10122554	0	0	0	0	0	0	0	0
Dendrobium_GLEAN_10073558	32.5827	50.9257	37.8146	51.265	51.0916	27.5377	30.915	64.9342
Dendrobium_GLEAN_10077888	5.06343	19.7418	13.7852	21.6299	22.9247	8.49336	10.4214	12.8852
Dendrobium_GLEAN_10143180	0	0	0	0	0	0	0	0
Dendrobium_GLEAN_10028672	0.951224	1.20918	1.65325	0.855954	2.69851	0.932346	2.26209	1.85656
Dendrobium_GLEAN_10034948	57.0094	67.1778	58.9831	61.7224	67.0613	63.7897	78.3313	52.9754
Novel03494	0	0.0496167	0	0.0790261	0.0511057	0	0	0.0438302
Dendrobium_GLEAN_10024759	0	0	0	0	0.166174	0	0	0
Dendrobium_GLEAN_10047313	7.40857	0.0597944	0.0520252	0	0	7.57967	0	0
Dendrobium_GLEAN_10053568	17.0685	20.7115	18.847	21.9919	18.6909	19.867	20.8608	33.4028
Dendrobium_GLEAN_10119854	17.7277	19.9742	21.4856	20.2648	15.7121	17.5638	17.4863	20.8474
Novel05878	12.1436	10.646	6.43982	10.9812	10.6522	10.7886	11.7861	20.5106
Dendrobium_GLEAN_10037100	8.4388	7.81207	11.5949	6.09929	7.16749	7.80533	6.64193	5.27723
Dendrobium_GLEAN_10143929	0	0	0	0	0	0	0	0
Dendrobium_GLEAN_10119953	0.715828	1.21326	1.45776	1.10423	0.119017	0	0	0.612438
Dendrobium_GLEAN_10034448	0	0	0	0	0	0	0	0
Novel00158	4.84072	5.09018	4.66189	3.8403	5.79483	5.08162	6.48797	6.03483
Dendrobium_GLEAN_10068450	50.7641	65.9252	41.0666	50.8437	34.6124	38.0549	48.3174	43.2055
Dendrobium_GLEAN_10108900	11.0707	23.4802	9.80138	25.7965	9.50621	8.91627	4.38253	10.5508
Dendrobium_GLEAN_10079024	36.5673	43.6632	32.4703	33.1831	24.0068	22.1525	20.9598	28.7517
Dendrobium_GLEAN_10118355	0	0	2.15641	0.087722	0	0.0764408	0	0.145959
Dendrobium_GLEAN_10052779	26.2213	42.3946	21.6506	31.5326	18.2473	20.1817	36.2621	49.0293
Dendrobium_GLEAN_10070199	2.19191	2.55535	2.49697	2.46287	3.4824	2.91002	1.90413	2.01424
Dendrobium_GLEAN_10096819	19.6579	16.0839	12.3502	16.7696	13.0237	20.4851	21.6916	24.9926
Dendrobium_GLEAN_10131269	39.6654	27.2398	56.2222	26.9783	60.8327	48.8825	36.2216	39.7633
Dendrobium_GLEAN_10121373	88.0695	75.4127	92.9154	88.7932	96.5293	110.811	65.8022	63.5687
Dendrobium_GLEAN_10004166	0.367856	1.27241	0.0885667	0.864688	0.0524239	0.47093	0.931287	5.17048
Dendrobium_GLEAN_10097569	4.05522	3.35478	1.49504	3.12777	1.09564	1.13564	0.704559	2.74669
Dendrobium_GLEAN_10033059	0	2.2436	0	1.69408	0	0	1.1806	1.40938
Novel02516	0.802595	0.847994	0.491875	0.600279	0.72787	0.196156	0.456362	0.187274
Dendrobium_GLEAN_10033847	0	0	0	0	0	0	0	0
Dendrobium_GLEAN_10079638	1.86928	6.55669	3.57612	5.11762	4.30911	2.53534	2.73861	3.2418
Dendrobium_GLEAN_10068075	56.7767	23.551	14.6547	23.0111	20.8033	42.184	3.64959	6.25109
Dendrobium_GLEAN_10107595	12.1364	20.327	10.1117	19.9884	10.7871	10.6715	11.1296	11.4374
Novel00682	1.65535	1.60324	2.52595	1.74836	1.96377	2.08482	1.8189	1.99042
Novel03820	17.9104	20.2902	49.4856	15.6282	42.0148	26.0694	0	25.9106
Dendrobium_GLEAN_10091396	18.6851	15.1685	24.7647	19.2156	24.9739	25.6315	30.5726	25.8678
Novel02842	28.4652	27.8997	18.5223	33.6961	19.4758	33.8895	18.288	21.7842
Dendrobium_GLEAN_10100247	37.2391	30.7607	32.3163	31.2919	37.9615	39.7074	35.2697	26.4131
Dendrobium_GLEAN_10017959	0	0	0	0	0	0	0	0
Dendrobium_GLEAN_10096756	0	0.0955375	0.374058	0.101444	0.0984047	0	1.59387	0.337582
Dendrobium_GLEAN_10045813	1.80368	2.94214	0.879953	2.44065	1.51522	0.510427	0.593762	0.324877
Novel00656	0	0	0	0	0	0	0	0
Dendrobium_GLEAN_10078042	0	0	0	0	0	0	0	0
Dendrobium_GLEAN_10067082	0.204522	0	0	0.0701099	0.136019	0.427655	0.142136	0.0583274
Dendrobium_GLEAN_10000139	16.4498	15.6396	16.0238	11.9504	10.8397	6.35635	3.30375	10.2003
Dendrobium_GLEAN_10043826	10.0645	12.7404	3.34782	11.1674	1.93759	4.11404	15.8297	8.68641
Dendrobium_GLEAN_10057305	0	0	0	0	0	0	0	0
Dendrobium_GLEAN_10007492	0	0	59.7423	0.275128	77.9306	0	0	0
Dendrobium_GLEAN_10048230	5.59082	5.44908	6.73888	15.8659	12.496	13.667	68.0196	11.6555
Dendrobium_GLEAN_10130588	0	0	0	0	0	0	0	0
Novel04265	0	0	0	0	0	0	0	0
Dendrobium_GLEAN_10129661	2.08101	1.28259	1.91304	1.55644	2.39053	1.29977	1.57771	2.42788
Novel03002	18.5599	24.0703	19.1975	24.3296	14.6213	11.7782	4.73313	10.6316
Novel05012	41.7149	37.3117	40.9855	36.5852	43.4156	34.5774	51.5803	40.4279
Dendrobium_GLEAN_10137962	0	0	0	0	0	0	0	0
Dendrobium_GLEAN_10058952	1.28571	0.166031	0.0722292	0.264443	0	0.0768119	0	0
Dendrobium_GLEAN_10014530	0.852999	1.48706	0.0718802	0.526332	0.42547	0.687967	9.06992	0.875757
Dendrobium_GLEAN_10132016	1.47827	0.0795405	0	0	0	0.22079	0.256836	0.281057
PEQU_08151-D1	0.25683	1.49247	0.216425	0.792369	0	0	0	0
Dendrobium_GLEAN_10067202	21.8987	27.5148	5.40307	13.6949	1.86969	1.94476	0.616981	6.49846
Novel03877	28.2624	54.3689	43	61.3276	45.4763	24.5808	41.6175	60.9973
Dendrobium_GLEAN_10068303	20.3736	21.7054	5.91353	18.1585	7.45227	54.3671	14.1589	21.1108
Dendrobium_GLEAN_10012279	35.9003	46.4074	35.1915	48.5983	48.0195	41.495	38.6462	32.0941
Dendrobium_GLEAN_10052817	0	0	0	0	0	0	0	0
Dendrobium_GLEAN_10070319	9.33372	10.4844	9.64919	11.0831	11.183	11.2962	7.72376	14.1189
Dendrobium_GLEAN_10069224	31.0303	26.1569	22.8211	29.3064	27.2764	38.1894	48.3465	21.7041
Dendrobium_GLEAN_10069252	0.485418	1.35164	0.562444	0.936003	0.121061	0.326253	0.442771	0.986355
Dendrobium_GLEAN_10022136	5.02081	6.23346	5.45192	6.13368	5.51292	7.21709	20.444	8.93723
Novel03393	11.8729	4.865	5.4835	5.04836	6.94708	13.5043	14.638	6.64178
Dendrobium_GLEAN_10008175	0	0	0	0	0	0	0	0
Dendrobium_GLEAN_10123254	59.3579	0.181928	0.474868	0.965875	0	63.293	46.604	2.24995
Dendrobium_GLEAN_10082702	18.3078	18.9059	16.5989	20.0747	18.4406	20.6471	22.8464	20.6232
Dendrobium_GLEAN_10073650	1.02148	0.847994	1.47562	1.65077	0.582296	1.56925	1.21697	0.624248
Dendrobium_GLEAN_10095587	2.22856	2.49047	0	3.17332	0	0.921743	0	0.440004
Dendrobium_GLEAN_10040822	0.0511059	0	0	0	0.0254912	0.0915962	0	0
Dendrobium_GLEAN_10087773	41.8923	39.9028	69.1446	44.328	64.9317	51.9685	35.9109	27.6217
Dendrobium_GLEAN_10071939	8.38465	17.0057	7.31492	6.28952	6.69152	8.30942	5.86132	6.07648
Dendrobium_GLEAN_10045340	0.150915	0.146164	0.254345	0	0.301102	0	0	0
Dendrobium_GLEAN_10019486	47.0069	38.9999	69.938	54.1288	69.0459	57.7971	62.2804	34.3074
Dendrobium_GLEAN_10069000	17.3092	16.8485	17.4446	16.7272	16.2261	11.8479	5.53105	7.1441
Novel04714	1.31287	0.608125	1.15442	0.93923	2.27773	1.32997	0.297521	0.58604
Dendrobium_GLEAN_10067255	33.4876	38.583	53.2133	44.9042	56.1406	40.8442	78.5228	75.9061
Dendrobium_GLEAN_10117118	9.74931	8.1834	12.5971	7.5753	8.32093	9.31921	7.56591	5.46811
Dendrobium_GLEAN_10026280	1.17714	5.50213	5.69292	3.73696	5.51409	2.2015	3.84138	4.81666
Dendrobium_GLEAN_10093027	91.3161	102.99	49.6344	104.614	60.8619	77.2269	80.3572	77.3378
Dendrobium_GLEAN_10091204	41.1107	68.923	42.9844	69.0571	50.3524	41.9556	67.3979	86.1393
Dendrobium_GLEAN_10142084	0	0	0	0	0	0	0	0.214789
Dendrobium_GLEAN_10125645	0	0	0	0	0	0	0	0
Novel00856	3.71136	2.94097	2.41669	2.60233	3.02924	3.93062	2.81375	4.32997
Dendrobium_GLEAN_10100754	15.271	13.2881	9.55084	11.5331	7.37902	13.7919	8.08399	7.5534
Dendrobium_GLEAN_10141867	0	0	0	0	0	0	0	0
Dendrobium_GLEAN_10094426	32.8381	38.7627	54.5229	39.3642	22.9595	16.5144	49.719	49.2794
Dendrobium_GLEAN_10015893	2.58577	2.93368	0.373537	2.81114	0.663305	2.11859	1.23224	4.48779
Novel03642	81.7297	72.7775	67.1519	92.0643	72.0002	107.576	54.3495	75.4811
Dendrobium_GLEAN_10072250	0	0	0	0	0	0	0	0
Dendrobium_GLEAN_10021635	0	0	0	0	0	0	0	0
Dendrobium_GLEAN_10025781	0	0	0.0875248	0	0	0	0	0
Dendrobium_GLEAN_10045848	0.254059	0	0	0	0	0.341509	0.132422	0
Dendrobium_GLEAN_10077528	12.4124	16.7626	65.5569	27.6871	73.7714	21.9332	2.36917	6.58118
Dendrobium_GLEAN_10068064	0	0	0	0	0	0	0	0
Dendrobium_GLEAN_10007518	0	0	0	0	0	0	0	0
Dendrobium_GLEAN_10017136	42.9859	0	0.20523	0	0.242958	55.7633	0	0.104185
Dendrobium_GLEAN_10112841	0.136877	0	0	0.563053	0	0.245322	1.42687	1.52239
Novel00655	2.87082	0	1.13155	0	0.785259	2.94611	2.12384	2.33733
Novel00740	0.85714	188.777	0	166.423	0.342028	0	0.178705	0
Dendrobium_GLEAN_10077876	0.756732	0.122151	4.99516	1.29703	1.50981	0.226046	0.131476	1.07906
Dendrobium_GLEAN_10067669	0.356709	2.41835	0.30059	2.26216	0.177924	0	0.0619751	3.50966
Dendrobium_GLEAN_10102498	42.7548	41.2221	44.5402	49.004	75.6498	35.6541	84.4775	253.946
Dendrobium_GLEAN_10015450	0	0	0	0	0	0	0.112924	0
Dendrobium_GLEAN_10070471	0.160357	0.3969	0.0600574	0.238204	0.0177744	0.015967	0	0.106708
Dendrobium_GLEAN_10144208	5.66201	6.70237	5.86686	6.94421	4.72787	4.88604	6.51445	6.56661
Dendrobium_GLEAN_10037164	0.0617381	0.298972	1.19658	0.253964	0.739068	0.387282	1.54461	0.369747
Dendrobium_GLEAN_10103841	0.844469	0.743531	0.58223	0.236849	0.689261	0.481577	0	0
Novel00051	3.05225	5.34015	0.746726	2.73389	0.687553	0.441169	0.205278	11.9619
Dendrobium_GLEAN_10006420	5.3424	7.27898	8.4697	8.93955	7.94908	9.00708	8.68415	7.43719
Dendrobium_GLEAN_10008948	44.6188	34.9569	53.536	33.9136	53.9658	57.4368	43.1292	39.6183
Dendrobium_GLEAN_10013695	0	0	0	0	0	0	0.662108	0
Dendrobium_GLEAN_10104452	41.1336	67.4975	1.02863	36.3169	0.509743	2.8492	3.63989	2.45303
Dendrobium_GLEAN_10037467	406.905	348.477	218.87	346.017	284.108	441.297	187.514	346.978
Novel00134	1.19709	2.31881	2.5219	4.00101	2.9855	2.41372	3.43174	3.58466
Dendrobium_GLEAN_10027708	0	0.211126	0	0	0	0.130232	0.833221	0.186504
Novel04590	0	0	4.0247	0	2.81542	0	0	0
Dendrobium_GLEAN_10114490	0.115784	0	0.243921	0.476287	0.173257	0.103759	0.0603495	0
Dendrobium_GLEAN_10062473	0.156257	0	0.0438915	0	0	0.0933525	0.16289	0.222814
Novel01834	0.023041	4.17302	4.27154	3.55429	5.14872	0.020648	0	2.20787
Dendrobium_GLEAN_10090644	8.48329	11.0823	345.63	170.324	157.251	17.9448	7.60944	100.009
Dendrobium_GLEAN_10028727	40.2444	31.8704	57.7777	48.8156	79.1506	86.2059	82.9493	40.4156
Dendrobium_GLEAN_10023726	4.11638	2.51797	4.65546	4.01046	2.59354	7.57186	5.98497	2.59503
Dendrobium_GLEAN_10054883	3.55952	3.94643	7.30147	10.163	9.11092	6.54755	26.2673	6.89223
Dendrobium_GLEAN_10106631	0	0	0	0	0	0	0	0.0751582
Dendrobium_GLEAN_10082389	37.9869	24.1785	63.2546	21.4042	53.8645	46.2977	71.2849	91.5895
PEQU_36443-D18	1.11588	2.8608	5.86318	2.36262	8.77448	2.58819	2.18963	2.58332
Dendrobium_GLEAN_10003188	0.850944	0.206039	0.0896338	0.218777	0	0	0.221766	0.0910048
Dendrobium_GLEAN_10021640	0	0	0	0	0	0	0	0
Dendrobium_GLEAN_10008252	0.577029	4.02381	14.393	2.84838	15.3119	0.41368	8.30102	5.72676
Dendrobium_GLEAN_10030599	25.0311	18.6082	27.7631	34.7863	37.591	32.0709	52.3284	43.6998
Dendrobium_GLEAN_10081346	0.97195	0.470675	0	0.333183	0.808002	0.145167	1.68868	0.138595
Dendrobium_GLEAN_10032038	5.62527	7.03722	4.74028	6.34742	6.2352	4.55093	0	3.67643
Dendrobium_GLEAN_10122200	8.85895	10.5238	10.0277	10.8826	10.6576	8.01154	13.3136	7.70083
Dendrobium_GLEAN_10003920	5.98218	4.20521	5.52889	2.48066	4.81269	4.15036	10.36	14.7766
Dendrobium_GLEAN_10140952	25.4046	22.5108	23.2298	22.6054	23.0066	30.1933	19.7214	26.6681
Dendrobium_GLEAN_10051428	656.029	1700.91	251.293	1773.32	22.2815	13.1184	2.04518	198.196
Dendrobium_GLEAN_10096075	6.71467	6.3427	2.58465	6.90533	1.81933	3.64009	3.8023	5.88669
Novel04114	1.07193	2.89827	2.07004	2.20474	2.27235	0.800502	1.11743	2.82775
Dendrobium_GLEAN_10128332	0	0	0	0	0	0	0	0
Dendrobium_GLEAN_10132762	11.959	7.90335	15.2942	5.13645	28.9831	45.2633	82.3531	207.523
Dendrobium_GLEAN_10048410	14.8824	6.84048	47.6135	5.70694	17.6144	27.3516	16.303	0
Dendrobium_GLEAN_10034377	0	0	0	0	0	0	0	0
Dendrobium_GLEAN_10116546	35.7392	35.325	29.5305	32.9792	18.8093	28.9458	48.1311	41.8825
Novel03516	0.934999	1.56732	0.606078	1.55327	0.251122	0.805664	2.66165	2.79983
Dendrobium_GLEAN_10017158	2.54591	2.46576	2.21458	1.68916	1.88434	2.1343	2.48275	1.61608
Dendrobium_GLEAN_10102462	1.80174	2.79203	1.11341	2.47054	2.99565	3.01395	1.12694	2.46642
Dendrobium_GLEAN_10080876	0	0	0	0	0	0	0	0
Dendrobium_GLEAN_10029683	0.2559	0.0826145	0.14376	0	0.340376	0.305763	0.800287	0.437878
Novel02875	3.98919	2.40684	2.64519	4.10246	2.60955	6.27069	11.3848	14.4913
Novel05838	0.471694	0.630445	0.405435	0.426877	0.385855	0.37198	1.23913	0.524635
Dendrobium_GLEAN_10142138	38.8456	36.4155	39.7362	43.3667	42.0674	41.3266	24.0369	33.5904
Dendrobium_GLEAN_10045179	6.63309	5.33847	4.72356	5.86066	4.38031	5.94418	5.94076	4.31623
Dendrobium_GLEAN_10018266	18.4569	15.254	34.2688	22.6506	27.4957	21.3366	9.04297	11.1064
Dendrobium_GLEAN_10075779	1.20389	0.194332	0.760869	0	0.50041	0.629334	2.82374	0.944175
Dendrobium_GLEAN_10073843	0	0	0	0	0	0	0	0
Dendrobium_GLEAN_10003529	0	0	0	0	0	0	0	0
Dendrobium_GLEAN_10014044	0.970678	2.82036	0.817967	1.56866	1.79833	0.331377	0	0.988665
Novel00355	7.68495	0	6.01336	0	9.30919	9.59233	53.5032	65.7498
Dendrobium_GLEAN_10067172	43.6048	80.8476	25.332	67.362	43.1207	70.3823	7.78488	19.1678
Dendrobium_GLEAN_10098974	0	0	0	0	0	0	0	0
Novel05156	17.9273	11.8661	6.52863	10.0057	7.90853	20.8286	8.07637	0.154151
Dendrobium_GLEAN_10123321	0	0	0	0	0	0	0	0
Dendrobium_GLEAN_10076388	105.943	128.992	161.758	158.238	174.886	175.638	153.564	140.277
Dendrobium_GLEAN_10034844	8.2141	13.5933	4.90523	6.58493	8.38783	4.46297	1.28105	3.48618
Dendrobium_GLEAN_10123970	11.4771	13.3389	14.3956	16.6604	18.4952	21.4801	34.4204	19.1101
Dendrobium_GLEAN_10058237	0	0	0	0	0	0	0	0
Dendrobium_GLEAN_10024569	0	0	0	0	0	0	0	0
Dendrobium_GLEAN_10045829	0.111754	0	0	0.114927	0	0.200294	0.116498	0
Novel01800	0.0867848	0	0.0457072	0	0.0162328	0.0486072	0.113086	0.0278438
Dendrobium_GLEAN_10039976	12.8156	20.2272	10.8794	18.1585	11.9324	12.7607	10.6877	13.32
Dendrobium_GLEAN_10030430	0.481557	0.233198	0.270531	0.0825384	0.880722	0.359619	0.418332	1.92268
Dendrobium_GLEAN_10046683	0.16978	0.164435	0.286139	0.1746	0.508109	0.45644	0.26548	0.145258
Dendrobium_GLEAN_10111869	2.86608	1.68534	2.30736	1.23688	2.04225	3.09585	4.40158	2.05803
Dendrobium_GLEAN_10140593	0	0	0	0	0	0	0	0
Dendrobium_GLEAN_10066846	0.0623925	0	0	0	0	0	0	0
Dendrobium_GLEAN_10097367	0	0	0	0	0	0	0	0
Dendrobium_GLEAN_10046735	69.3991	72.3013	85.7909	38.1557	26.8676	22.1325	23.183	58.3237
Dendrobium_GLEAN_10083640	3.4869	3.88011	7.31457	4.04369	5.25473	3.52366	1.31476	3.87191
Dendrobium_GLEAN_10056088	16.7469	11.8122	20.5548	21.9025	12.893	17.4545	2.08735	21.8036
Dendrobium_GLEAN_10036598	0	0	0.286139	0	0.16937	0	0	0
Dendrobium_GLEAN_10078112	0	0	0	0	0	0	0	0.316926
Dendrobium_GLEAN_10045349	0.438685	0	0	0	0.109406	0.393124	0	0.84448
Dendrobium_GLEAN_10069152	0.0869807	9.68788	0.0732966	14.6699	0	0.155894	3.44557	12.3533
Novel01782	0.397284	5.13036	8.70434	4.01756	7.46412	0.652709	0.207074	13.936
Dendrobium_GLEAN_10071521	0.0361826	0	0	0	0	0	0	0
Dendrobium_GLEAN_10052547	0.441427	0.42753	1.8599	0.453961	0.660542	0.791162	1.84066	2.07719
Dendrobium_GLEAN_10137583	0	0	0	0	0	0	0	0
Dendrobium_GLEAN_10072919	4.86066	3.74689	9.11143	6.12083	4.65101	2.13347	10.3408	1.78226
Dendrobium_GLEAN_10065545	0	0	0	0.1579	0.153169	0	0.800287	0.39409
Novel04923	1.83564	4.48695	0.810254	2.78669	1.0464	2.58499	6.19629	0.373931
Dendrobium_GLEAN_10014299	64.5343	68.7075	97.7024	88.7032	136.395	100.541	111.906	138.1
Novel05597	2.53249	3.12727	3.78797	2.90825	3.93693	3.13943	2.96999	3.28618
Dendrobium_GLEAN_10078868	47.1144	44.7082	41.8341	43.8903	35.2116	46.212	36.0184	43.0522
Dendrobium_GLEAN_10067627	5.06986	2.03183	8.10254	14.7425	7.84802	4.07331	2.00468	4.93589
Dendrobium_GLEAN_10080495	2.59819	5.59769	1.92134	1.0906	1.32241	1.42552	0.939677	0.725852
Dendrobium_GLEAN_10111674	13.0994	19.0598	1.65325	8.93955	1.05386	0.649159	1.63614	7.8762
Novel04294	4.46455	3.73967	15.1504	9.30672	10.9539	11.0294	4.65406	6.91678
Dendrobium_GLEAN_10051998	4.87092	6.78151	3.59153	4.69615	3.03697	2.18252	7.61653	10.6789
Dendrobium_GLEAN_10065891	5.8857	11.5126	3.50099	13.2925	2.87818	1.65472	0.721828	6.71413
Dendrobium_GLEAN_10070200	37.9496	43.0083	35.9766	60.4378	30.4967	56.7984	46.566	23.1112
Dendrobium_GLEAN_10001644	7.71837	9.83063	4.09847	10.0035	4.3245	6.72725	11.0219	8.41277
Dendrobium_GLEAN_10070077	18.8716	17.9156	19.1304	21.2329	22.7403	28.0465	16.4588	11.2702
Dendrobium_GLEAN_10080071	135.26	2.25865	57.5517	0	59.1579	146.589	44.4537	127.41
Dendrobium_GLEAN_10019848	0.0661314	0	0.0557274	0	0	0.0592631	0.344693	0.0565798
Dendrobium_GLEAN_10092586	12.6531	16.3165	25.3609	20.6825	28.4066	19.2612	20.5926	24.5664
Dendrobium_GLEAN_10006803	0	1.71012	2.32892	1.81585	1.14877	0	8.0829	1.51068
Novel04327	0.30564	0.277517	0.273653	0.157159	0.20962	0.256778	0.219047	0.637395
Dendrobium_GLEAN_10012800	0	0	0	0	0	0	0	0
Novel00423	6.58973	3.92755	1.06789	3.90971	0.505678	0.908512	0.528419	0.433688
Novel02534	1.14601	4.43974	2.46795	5.10706	1.14325	1.36932	2.92028	3.48618
Dendrobium_GLEAN_10005378	0	0	0	0	0	0	0	0
Dendrobium_GLEAN_10131131	31.0778	21.6427	43.4931	21.8167	42.0037	41.5867	36.8132	35.8302
Dendrobium_GLEAN_10079409	3.25977	1.49087	1.14455	1.76929	2.0776	3.16465	2.07664	4.33836
Dendrobium_GLEAN_10030233	13.203	13.1469	15.9516	14.7776	17.4558	16.1084	6.90939	8.25657
Dendrobium_GLEAN_10023508	0	0	0	0.144115	0	0	0	0
Dendrobium_GLEAN_10033441	5.36955	5.95035	5.95589	4.49467	4.26035	3.08855	5.28507	9.76493
Dendrobium_GLEAN_10041600	6.77684	8.1291	6.96808	8.37591	6.94654	7.80019	6.74045	8.72365
Dendrobium_GLEAN_10082287	0	0	0.17505	0	0	0.062052	0	0.296212
Dendrobium_GLEAN_10063088	0	0	0	0	0	0	0	0
Novel04680	0.217095	0.735913	0.365882	0.11163	0.324857	0	0.226311	9.1941
Dendrobium_GLEAN_10072925	36.0205	87.4442	32.0399	58.3492	17.6144	26.4776	14.1117	46.1261
Sb04g009240.1-D3	19.7309	12.2233	18.9236	15.4773	22.4614	25.0623	31.3777	19.9227
Dendrobium_GLEAN_10118739	33.016	19.5442	29.168	26.4883	28.295	27.4521	9.72921	23.6913
Dendrobium_GLEAN_10032348	5.64299	13.3107	9.66382	12.7296	8.53483	6.44349	15.75	6.93044
Dendrobium_GLEAN_10100393	11.5188	13.5048	15.3901	15.6646	14.6661	15.28	7.58384	19.0618
Dendrobium_GLEAN_10035912	4.72191	8.17643	6.19766	7.65186	7.7652	4.87264	3.04291	7.59013
Dendrobium_GLEAN_10040010	10.6541	7.36221	6.91001	6.52473	5.13506	6.91932	2.74539	2.7141
Novel02779	0	0	3.95523	0	3.1534	0	0	0
Dendrobium_GLEAN_10119781	1.5727	0.692357	17.4093	0.808676	1.28364	0.768741	2.31014	0.611611
Dendrobium_GLEAN_10046786	0.490475	0.593792	0.206656	0.504401	0.366968	0.329651	0	0.104908
Dendrobium_GLEAN_10000437	0.198394	0.384297	0.835911	0	0.593745	0	0.413632	8.65671
Dendrobium_GLEAN_10025822	440.418	449.029	602.254	453.615	372.587	505.892	1890.45	422.415
Dendrobium_GLEAN_10028632	0	0	0	0	0	0	0	0
Dendrobium_GLEAN_10084427	27.7698	25.6518	25.7005	25.752	24.5001	31.0711	35.9766	32.5483
Novel03251	146.304	155.393	151.875	179.704	129.214	146.617	82.4448	165.844
Dendrobium_GLEAN_10069539	0	0	0	0	0	0	0	0
Novel00521	2.40778	1.92046	11.5771	2.11201	14.977	9.20202	4.35558	5.81652
Dendrobium_GLEAN_10074887	0	1.12508	0.783116	0	0	0.416401	0	0.596321
Novel03483	2.51786	1.35891	2.38089	1.58129	3.14452	3.97878	1.04188	2.87775
Dendrobium_GLEAN_10032350	5.77251	15.3253	16.1382	5.51738	19.3081	17.7707	16.7783	16.1527
Dendrobium_GLEAN_10084209	36.6221	34.9263	36.9225	41.9854	52.9365	52.9116	60.8684	78.6513
Dendrobium_GLEAN_10093276	0.0991971	0.192148	0.167182	0.81611	0	0	0	0
Dendrobium_GLEAN_10133706	0.0809958	0.261486	0.0227511	0.166591	0.215467	0.145167	0.0562893	0.0692973
Dendrobium_GLEAN_10021458	15.1659	12.6566	17.9361	16.4954	17.658	17.2332	14.1694	16.0042
Dendrobium_GLEAN_10043756	2.22035	2.35526	1.15826	1.73973	1.26571	1.3265	0.220438	0.995059
Dendrobium_GLEAN_10032042	0.0757815	0.0366979	0	0	0	0	0.0394992	0
Dendrobium_GLEAN_10075254	11.0084	11.7175	7.71515	22.642	8.15484	14.5535	21.3608	15.4798
Dendrobium_GLEAN_10008711	68.3708	35.5299	32.0684	24.46	23.0033	60.0416	130.275	272.888
Dendrobium_GLEAN_10132784	47.0856	47.4336	49.6429	47.6451	52.0353	54.9701	47.1142	49.894
Novel02110	5.68516	10.7502	8.82106	9.3731	8.7322	6.79294	6.96127	6.09934
Dendrobium_GLEAN_10018047	0	0	0	0	0	0	0	0
Dendrobium_GLEAN_10024667	3.0507	1.43256	1.24643	1.33099	1.38333	2.40248	0.481848	1.66096
Dendrobium_GLEAN_10110405	5.72285	11.0178	8.40999	2.51204	8.70279	5.06594	13.5321	2.56756
Dendrobium_GLEAN_10098577	34.3918	59.7266	55.6305	63.4191	59.0215	51.7208	11.9506	57.8342
Dendrobium_GLEAN_10129300	0	0	0	0	0	0	0	0
Dendrobium_GLEAN_10125363	0	0	0.102615	0	0.121479	0	0	0
Dendrobium_GLEAN_10025816	0	0	0	0	0	0	0	0
Dendrobium_GLEAN_10020508	0	0	0	0	0	0	0	0
Dendrobium_GLEAN_10007648	0	0	0	0	0	0	0	0
Novel05544	171.798	47.5536	59.4043	18.2271	58.2043	275.307	421.334	58.7423
Dendrobium_GLEAN_10093403	0.131769	0	0	0	0	0	0	0.225475
Dendrobium_GLEAN_10013821	82.0582	9.3904	10.4952	33.3175	9.04313	53.4035	56.2059	6.20458
Dendrobium_GLEAN_10059707	0.177637	0	0	0	0.248091	0.12735	0.481461	0
Dendrobium_GLEAN_10023130	0	0	0.12365	0	0.390348	0.0438317	9.02485	0.167388
Dendrobium_GLEAN_10056623	0.360349	0	0	0	0	0	0	0.308302
Dendrobium_GLEAN_10047759	4.8335	3.24827	7.60585	3.49981	8.85643	5.92267	11.6712	11.3512
Dendrobium_GLEAN_10076138	43.5909	39.7247	55.952	48.1388	49.6324	40.2998	24.4463	36.8228
Dendrobium_GLEAN_10032481	0	0	0	0	0	0	0	0
Dendrobium_GLEAN_10053683	5.65686	8.37773	6.80325	4.82907	6.65678	5.34004	24.4754	12.9218
Dendrobium_GLEAN_10038658	17.6872	10.9832	11.1277	14.2607	10.2926	11.9416	31.6707	16.5995
Dendrobium_GLEAN_10052185	0.356382	0	0.0546026	0.0666365	0	0.232268	0.0675472	0.720691
Dendrobium_GLEAN_10107129	0	0	0.40952	0	0.323201	0	0	0
Dendrobium_GLEAN_10020260	2.39689	2.70834	3.36634	2.46495	4.54309	1.71836	1.16603	2.59755
Dendrobium_GLEAN_10072989	0.171428	0.664125	1.15567	0.352591	0.684056	1.68986	1.07223	0.880008
Dendrobium_GLEAN_10047559	0	2.86346	4.42916	2.6182	2.13012	0	0	0.702642
Dendrobium_GLEAN_10021574	24.0123	15.1715	6.41196	16.1801	2.9643	2.41659	0.483442	10.8599
Dendrobium_GLEAN_10135437	0	0.172739	0.375738	0.183419	0	0	0	0.152594
Dendrobium_GLEAN_10014015	71.8254	49.9786	17.293	45.7259	21.7088	86.4723	44.7463	26.3729
Dendrobium_GLEAN_10116720	4.07471	5.16072	1.67281	6.46828	4.83616	4.19457	3.79024	9.92222
Dendrobium_GLEAN_10126112	16.7132	10.2715	9.66213	8.16559	11.5214	14.0817	18.9854	9.14484
Dendrobium_GLEAN_10004316	1.41062	1.27199	0	1.75081	0	2.31028	2.941	1.20688
Dendrobium_GLEAN_10083566	0.19914	0.385742	0.279684	0.0682649	0.264879	0.0594859	0.0691978	0.113585
Dendrobium_GLEAN_10030376	4.08027	3.42724	5.29444	4.34466	5.33116	2.81518	5.53328	5.34453
Dendrobium_GLEAN_10123639	10.7263	16.9947	11.9126	13.237	13.3343	7.54192	3.38315	7.62399
Dendrobium_GLEAN_10015368	19.2814	19.6706	16.9266	18.1097	20.5108	18.4736	22.6044	16.9713
Dendrobium_GLEAN_10022310	2.41657	3.37031	4.18138	3.28045	3.56789	3.2917	3.5604	4.71398
Dendrobium_GLEAN_10047847	5.85397	6.45329	5.01321	6.90119	4.32052	4.13708	0.942657	5.04917
Dendrobium_GLEAN_10139354	1.68528	1.8177	0.355035	0.590839	0.420301	0.82377	25.4738	1.93341
Dendrobium_GLEAN_10017732	5.94312	9.14289	14.1244	9.35382	13.6619	8.45965	14.007	11.9233
Dendrobium_GLEAN_10045307	1.1079	0.268254	10.678	4.62862	11.1904	2.91644	0.938376	6.22045
Dendrobium_GLEAN_10048603	0	0.113253	0	0	0	0	0	0.100045
Dendrobium_GLEAN_10039187	71.1716	181.01	62.6071	149.318	26.4217	15.8232	0.424768	128.292
Dendrobium_GLEAN_10139809	95.2265	109.212	93.9956	100.56	77.1391	88.0646	84.1626	53.2385
Dendrobium_GLEAN_10093762	4.10341	3.4925	5.86786	5.88232	6.94654	2.78578	3.37022	5.63845
Dendrobium_GLEAN_10064991	0	4.5085	6.62801	1.65077	3.0425	0	3.34666	0
Novel04746	17.3097	17.666	12.3279	17.8777	6.61006	12.0092	2.36712	5.89197
Dendrobium_GLEAN_10077187	0	0	0	0	0	0	17.4305	0
Dendrobium_GLEAN_10038312	1.71166	1.04701	0.986886	0.648516	0.629087	3.63289	0	0.462453
Dendrobium_GLEAN_10062891	5.7046	10.9623	16.1001	13.2231	20.3244	10.5488	27.4683	30.9883
Novel00995	1.35088	0.212607	2.80319	0.0694617	1.63398	2.66327	4.22466	0.202259
Dendrobium_GLEAN_10139933	0.0874113	0.211649	0.368297	0.359573	0.392401	0.0783329	0.318926	0.0373931
Novel03818	0.159073	17.3323	1.74261	14.4777	0.476066	0.142552	1.82408	3.67463
Dendrobium_GLEAN_10092879	0	0	0	0	0	0	0	0
Dendrobium_GLEAN_10004022	0	0	0	0	0	0	0	0
Dendrobium_GLEAN_10078597	14.77	19.7174	13.5636	18.4515	12.8307	13.025	12.5811	13.2622
Novel00271	0.964245	1.26527	1.67752	1.24753	1.98589	1.14284	1.91308	2.44831
Dendrobium_GLEAN_10047162	0.776792	1.47574	2.03928	1.68987	1.66905	0.910305	2.39815	2.30053
Dendrobium_GLEAN_10088865	9.03819	10.6488	9.97182	6.08476	11.1543	8.2665	3.54534	12.5956
Dendrobium_GLEAN_10046477	166.775	157.877	96.249	155.289	104.756	184.181	152.692	110.537
Novel03154	0.463036	4.66397	1.71683	3.80947	1.57052	0	0.868844	1.2677
Dendrobium_GLEAN_10115041	14.6138	16.7119	16.6937	17.8337	14.6357	14.3052	8.67954	12.5276
Dendrobium_GLEAN_10111908	1.46302	1.8567	0.170048	1.86773	0.050327	0.271256	0	1.89914
Dendrobium_GLEAN_10049756	20.8615	6.01709	3.91268	16.4771	5.54529	16.3507	11.5893	0.111902
Novel04618	1.81031	1.2197	2.78571	1.86171	2.35557	2.32764	1.72306	4.37716
Dendrobium_GLEAN_10040524	26.0731	21.816	24.6828	17.9887	36.3812	25.9531	9.97742	23.3661
Dendrobium_GLEAN_10004828	6.76473	3.88664	5.02415	3.77318	4.68956	9.86384	5.97617	5.19909
Dendrobium_GLEAN_10083453	96.6763	89.0432	90.3435	93.9583	99.9055	127.127	202.284	187.996
Dendrobium_GLEAN_10090697	2.92255	8.78648	10.1076	8.01476	10.5687	4.4196	12.9481	4.68832
Dendrobium_GLEAN_10031738	18.8635	0.106219	42.6044	0.451142	45.8413	41.0815	87.0027	63.0545
Novel02464	19.1757	16.0694	21.6026	18.3916	24.0135	19.6826	37.0023	18.0933
Dendrobium_GLEAN_10140170	10.8435	11.9507	11.8333	12.9886	13.9258	12.7331	7.40595	9.91717
Dendrobium_GLEAN_10035905	2.30554	3.9213	1.13726	1.5614	1.73901	0.503925	4.22062	2.45365
Dendrobium_GLEAN_10098581	26.1864	20.5794	22.6971	25.5449	28.0637	62.2202	38.6851	53.2579
Dendrobium_GLEAN_10109166	10.9282	22.1483	6.52298	26.8995	8.37822	9.97454	5.43232	32.3346
Dendrobium_GLEAN_10039267	0	1.1164	1.50117	0.700474	1.56805	0.0939065	1.20162	3.4517
Novel05077	0	0	1.16524	0	1.06111	0	0	0
Novel00806	1.22054	4.2556	0.411407	3.64006	0	0	0.127235	8.04072
Novel03889	0.557592	0.270019	0.205568	0.75262	0.0695307	1.12428	0.435946	0.685769
Dendrobium_GLEAN_10110051	26.4358	52.7529	46.403	63.7085	47.569	27.3554	36.0853	70.2424
Dendrobium_GLEAN_10143051	0.064678	0.125284	0.163508	0.0665145	0	0	0	0.221345
Dendrobium_GLEAN_10013389	0.227833	0.220661	0.479975	0	0.227283	0	0	0.0974632
Dendrobium_GLEAN_10100570	0.958137	1.98851	1.6148	1.82992	1.63855	1.83991	1.28418	2.69346
Dendrobium_GLEAN_10076918	5.41185	6.40088	6.40983	6.46318	8.16036	6.16838	8.16338	6.69991
Dendrobium_GLEAN_10098845	5.99908	10.4225	15.6088	10.1128	17.6144	10.087	19.0836	10.2652
Dendrobium_GLEAN_10034720	0.447015	0.865884	1.31841	0.229854	0.222968	1.40206	0	1.14735
Dendrobium_GLEAN_10001527	35.6745	38.565	28.8474	38.3551	22.1079	31.6465	21.7874	24.2017
Dendrobium_GLEAN_10048005	0	0	0	0	0	0	0	0
Dendrobium_GLEAN_10052825	0	0	0.125035	0	0.0740103	0	0	0.063474
Dendrobium_GLEAN_10135793	0.436576	0.375851	0	1.0476	0	0	0	1.74309
Dendrobium_GLEAN_10062695	1.48092	0.735536	1.08794	0.781009	0.643969	2.14379	1.62295	1.8518
Dendrobium_GLEAN_10126792	33.2132	49.3987	16.725	38.0638	6.06472	11.8975	2.42315	16.1394
Dendrobium_GLEAN_10108479	0.77157	2.84541	0.450127	2.89925	0.473666	0.850998	1.33023	1.39643
Dendrobium_GLEAN_10123823	3.48495	5.17537	4.40503	4.42015	6.25776	4.37221	6.05481	4.67118
Dendrobium_GLEAN_10006831	0.323983	0	0.40952	0.333183	0	0	0	0
Dendrobium_GLEAN_10080404	0	0	0	0	0	0.0988953	0.115041	0.37767
Dendrobium_GLEAN_10012080	1.20638	2.07126	2.03318	1.97374	2.43429	2.21132	3.77278	2.29886
Dendrobium_GLEAN_10072820	34.1271	0	0	0.152592	0	30.8487	27.3779	0.126948
Dendrobium_GLEAN_10095126	17.849	17.8819	15.0086	22.6191	18.1888	27.8283	6.76243	12.5124
Dendrobium_GLEAN_10082461	1.43464	1.71012	1.9529	1.85368	0.366968	0.197791	0	0.818285
Dendrobium_GLEAN_10134775	0	0	0	0.0680092	0	0	0.0689386	0.0565798
Dendrobium_GLEAN_10046239	145.21	140.42	183.658	143.061	151.507	152.834	182.692	168.591
Dendrobium_GLEAN_10080457	39.141	34.2024	39.4893	40.4595	41.6585	35.858	20.7862	29.5818
Dendrobium_GLEAN_10040005	10.2148	19.2212	14.2644	22.5105	14.4118	13.3386	6.23695	18.4777
Dendrobium_GLEAN_10094933	13.9116	12.3509	18.1857	7.887	27.0444	23.4152	8.92442	4.9593
Dendrobium_GLEAN_10092607	0	0.117332	0.102087	0	0.120854	0	0	0
Dendrobium_GLEAN_10104157	39.0531	42.6298	45.0335	50.1371	50.8905	42.6017	54.4852	62.4119
Dendrobium_GLEAN_10031946	0.0944229	0.640152	0.437624	1.40801	1.03614	0.126924	1.87019	5.89731
Dendrobium_GLEAN_10035596	0	0	0	0	0	0.156666	0	0
Novel03451	123.571	147.55	124.519	172.046	109.911	148.759	116.295	117.256
Novel00954	1.91437	2.75059	3.27957	3.00718	5.49839	2.92209	10.7019	5.59756
Dendrobium_GLEAN_10092466	13.902	28.8631	21.0733	26.8679	25.5051	15.8232	110.273	23.3779
Dendrobium_GLEAN_10078694	0	0	2.82379	0	4.62861	0	1.4779	2.86698
Dendrobium_GLEAN_10018615	4.39834	1.29648	1.28917	7.66982	0.763081	0.685484	0.930298	1.19982
Dendrobium_GLEAN_10026555	9.3123	12.0646	13.1467	11.4423	7.35946	8.99541	7.31222	12.0027
Dendrobium_GLEAN_10003790	0.194568	0.0942215	0.0409896	0.15007	0.242623	0.174361	0.507069	0.291316
Dendrobium_GLEAN_10087585	4.04866	2.59425	4.56624	2.83379	3.56282	3.94547	6.45114	8.02096
Dendrobium_GLEAN_10057713	334.911	276.284	304.541	262.118	319.92	310.506	128.846	211.691
Dendrobium_GLEAN_10110445	12.6844	6.89762	11.2571	10.141	11.1404	14.3504	12.3882	10.4918
Dendrobium_GLEAN_10034449	16.9413	18.7189	28.552	15.3365	11.0685	7.16323	7.83525	5.81816
Dendrobium_GLEAN_10124129	41.529	46.9158	34.8976	38.0491	28.3338	37.4761	39.5379	36.8725
Dendrobium_GLEAN_10102976	0	0	0	0	0	0	0	0
Dendrobium_GLEAN_10132591	8.51324	9.16136	6.50965	8.86305	7.2345	9.08895	3.72515	9.48671
Dendrobium_GLEAN_10097168	28.9674	18.4409	20.8446	18.7442	29.3845	40.0321	33.9292	24.9924
Dendrobium_GLEAN_10081450	13.2854	22.1051	10.4776	20.6107	10.2515	13.1776	5.68178	29.9707
Dendrobium_GLEAN_10124256	31.5447	63.2168	21.9009	51.755	19.9235	24.8312	46.9472	45.2072
Dendrobium_GLEAN_10024067	2.3031	3.08034	2.1256	2.48128	2.40694	2.91567	7.50746	7.25627
Dendrobium_GLEAN_10056790	0	0	0	0	0	0	0.0361623	0
Novel05083	8.61626	9.14322	7.70267	7.16578	11.4357	7.5871	9.37253	6.41024
Dendrobium_GLEAN_10022578	0.804057	0.0934492	3.19808	0.198453	3.43305	6.13907	16.8643	14.8316
Dendrobium_GLEAN_10042588	21.9387	29.85	12.1061	13.2822	6.17741	8.9422	6.93476	8.62813
Dendrobium_GLEAN_10034499	6.41714	10.4615	7.7251	10.3704	7.59449	6.17928	6.98039	2.38708
Dendrobium_GLEAN_10031253	0.097017	0	0	0	0	0	0	0
Novel04397	0	0	0	0	0	0	0	0
Dendrobium_GLEAN_10082288	0.162738	0.157615	0.137136	0	0.32469	0.364591	0.339292	0.348083
Dendrobium_GLEAN_10020297	29.8812	10.5238	12.5901	13.2696	15.6949	40.7753	21.0024	18.9803
Dendrobium_GLEAN_10113715	7.58601	1.0134	1.98389	8.33944	0.130477	0	0	7.04984
Dendrobium_GLEAN_10080970	1.30151	3.29839	0.859119	2.9	0.432787	0.602605	0.429638	3.35913
Dendrobium_GLEAN_10045684	8.2126	11.5334	12.111	9.71266	9.83132	9.56755	18.4066	18.62
Dendrobium_GLEAN_10098100	0.0832882	0	0	0	0	0	0.0868236	0
Dendrobium_GLEAN_10103045	4.443	7.45627	6.64884	8.54747	11.1189	5.42315	3.51363	8.8478
Novel00485	3.16246	4.59435	2.26519	2.27658	3.47031	1.62956	0.906594	1.7587
Novel05230	0.163492	6.80881	5.51082	8.57482	4.8929	0.293023	16.8727	0.979145
Dendrobium_GLEAN_10033582	20.9044	23.981	25.8248	23.7938	23.7896	23.2802	34.8033	27.3485
Dendrobium_GLEAN_10006624	10.5278	2.36125	5.66531	2.96309	5.6381	9.07023	0.500598	4.99346
Dendrobium_GLEAN_10130680	9.05492	53.7884	2.03476	31.6609	0.451652	0.270483	0	15.2359
Dendrobium_GLEAN_10055753	23.8876	32.032	27.1644	27.0477	24.9354	27.0341	44.2323	37.5879
Dendrobium_GLEAN_10094249	334.837	418.953	439.323	319.689	578.745	399.985	163.352	177.724
Dendrobium_GLEAN_10084154	7.01274	13.7052	7.17579	10.3027	6.49611	7.51885	6.78825	11.7854
Dendrobium_GLEAN_10090669	46.4946	30.3126	47.0464	27.5354	36.6727	49.4476	22.6311	18.7906
Dendrobium_GLEAN_10096829	26.1913	33.9744	53.218	37.1038	62.7074	41.8261	75.2217	58.9165
Dendrobium_GLEAN_10027916	0	0	0	0	0	0	0	0
Dendrobium_GLEAN_10101732	16.1544	24.1357	21.7384	22.1507	20.2379	15.8232	33.0275	39.642
Dendrobium_GLEAN_10069112	0	0.237517	0	0	0	0	0.127824	0
Dendrobium_GLEAN_10105633	11.0516	12.5081	25.441	13.2814	21.923	9.6002	29.0003	11.5927
Dendrobium_GLEAN_10085133	0	0.124826	0.217215	0.132543	0.128573	0	0	0
Novel02858	0	0.525652	0.365882	0.837224	0.270714	0	0.226311	0.232174
Novel04350	38.5331	51.9392	44.6376	46.8584	41.4329	35.5393	41.6348	41.39
Dendrobium_GLEAN_10003700	1.90887	0.61626	1.07238	0.817948	1.74558	1.85317	4.31146	1.36097
Dendrobium_GLEAN_10038681	0	0	0	0	0	0	0	0
Dendrobium_GLEAN_10111857	0	0	0	0.349201	0	0	0	0.581031
Dendrobium_GLEAN_10068454	471.562	518.417	558.07	516.765	527.823	526.429	248.317	385.727
Dendrobium_GLEAN_10108642	8.0161	10.9112	11.6843	11.92	7.56449	8.05724	4.40404	6.48758
Novel00162	4.11999	1.56761	2.04589	1.74018	2.05502	3.82395	1.15041	3.08431
Dendrobium_GLEAN_10118297	0	0	0	0	0	0	0	0
Dendrobium_GLEAN_10029460	7.42842	16.1218	6.12866	12.279	6.36293	7.94648	11.3521	11.6462
Novel03961	0	0	0	0	0	0	0	0
Dendrobium_GLEAN_10052893	5.75039	7.73158	7.92418	4.45265	4.25176	2.72815	2.96198	1.85217
Dendrobium_GLEAN_10074226	14.2583	14.4517	11.9453	11.5089	10.7506	29.2693	3.97514	19.9296
Dendrobium_GLEAN_10087109	0.122619	0	0.206656	0.252201	0	0.109884	0	0
Dendrobium_GLEAN_10070454	0.291853	0.141332	0	0.30014	0	0.130771	0	0
Dendrobium_GLEAN_10097161	0	0	0	0	0	0	0	0
Dendrobium_GLEAN_10045414	19.8215	23.8314	18.143	20.5015	22.6147	22.7651	28.7381	32.2603
Dendrobium_GLEAN_10051968	4.00172	3.99561	4.69321	4.66689	3.04549	3.69702	7.61208	5.54151
Dendrobium_GLEAN_10025836	0.178354	0.172739	0.450885	0	1.06754	0.479492	1.11555	0.76297
Dendrobium_GLEAN_10132904	1.67549	3.74479	3.90987	4.10885	2.70002	2.88745	4.43371	2.42591
Dendrobium_GLEAN_10124937	21.9911	34.0469	41.256	33.8408	33.4674	29.9203	46.0165	61.1139
Dendrobium_GLEAN_10082379	79.1757	72.8708	33.1702	87.4381	32.1997	73.1699	37.3994	58.5028
Dendrobium_GLEAN_10050509	15.5686	12.0313	19.039	13.8908	18.0203	20.5629	21.4885	21.8364
Dendrobium_GLEAN_10093225	15.2003	33.1795	22.3672	20.7087	27.5326	20.9056	16.755	53.5123
Dendrobium_GLEAN_10007400	52.7214	19.6019	51.0946	15.7602	47.9412	38.2146	43.5855	38.3371
Dendrobium_GLEAN_10114753	0.129072	1.3751	1.58799	1.64594	4.68688	1.041	1.85681	1.50185
Dendrobium_GLEAN_10068674	11.6064	16.6217	6.62843	13.1239	5.92636	9.11932	4.52998	6.87101
Dendrobium_GLEAN_10018811	0	0	0	0.057102	0	0	0	0.0950113
Dendrobium_GLEAN_10101470	71.8968	57.2989	144.26	71.3815	138.638	57.8822	102.188	76.9665
Dendrobium_GLEAN_10141523	35.3142	42.9057	32.814	35.8305	36.3298	29.386	35.8272	45.8599
Dendrobium_GLEAN_10072653	101.77	95.1029	112.567	100.676	108.511	106.356	78.6747	94.1466
Dendrobium_GLEAN_10032933	0.128884	0	0	0	0	0	0	0
Dendrobium_GLEAN_10079332	8.87079	10.3098	9.04143	10.0784	11.2935	14.3091	7.83822	10.9145
Dendrobium_GLEAN_10072226	6.62141	10.4142	7.67805	10.3596	8.52494	5.12227	3.36275	6.10082
Dendrobium_GLEAN_10132613	0	0	0	0	0	0	0	0
Dendrobium_GLEAN_10127846	37.7924	29.6021	52.5558	36.954	49.6501	39.3268	18.8372	13.2516
Dendrobium_GLEAN_10072245	40.2545	61.5821	38.6243	48.0776	49.7403	93.2998	166.899	110.835
Dendrobium_GLEAN_10002814	2.11157	1.90405	2.08616	2.17153	2.03383	2.44689	1.97349	2.30496
Novel00741	3.70316	0.155938	9.67827	0	8.51276	3.94379	6.37798	0
Dendrobium_GLEAN_10011527	0	0	0	0	0	0	0	0
Dendrobium_GLEAN_10061866	8.14283	5.06395	9.10088	4.0548	11.0304	11.2913	9.91813	12.3201
Dendrobium_GLEAN_10078511	0	0	0	0	0	0	0	0
Dendrobium_GLEAN_10017939	5.8291	12.0311	11.4694	11.3781	11.7994	7.81019	11.3271	7.21447
Dendrobium_GLEAN_10115433	174.691	142.932	135.382	196.436	182.804	278.982	129.272	75.0444
Novel04592	7.12763	20.8143	3.68568	14.4379	1.83147	4.25824	1.18208	9.51682
Dendrobium_GLEAN_10066777	7.319	6.99998	6.32174	5.45694	4.107	5.49304	4.67318	4.85296
Dendrobium_GLEAN_10063089	13.7882	14.1779	5.72277	10.7935	3.28475	5.0777	4.405	9.42561
Dendrobium_GLEAN_10127838	5.8574	7.39956	3.36213	8.99193	4.65767	5.24906	2.92028	8.27969
Dendrobium_GLEAN_10131811	0.064678	0.0626418	0	0	0	0	0	0
Novel04439	0.521884	0.505454	0	0.268352	0	1.51997	0.816057	1.56277
Novel01257	0.56727	0.757808	0.313189	0.362096	0.292707	0.31553	1.06035	1.25518
Dendrobium_GLEAN_10046605	0.377692	0.731602	0.477408	0.679728	0.18839	0.846163	0.689018	0.64628
Dendrobium_GLEAN_10121150	29.6584	33.8016	24.7599	33.7634	19.9539	26.5781	18.838	17.5853
Dendrobium_GLEAN_10122535	1.11226	1.48121	1.75739	1.14384	0	0.249185	0	1.07056
Novel03366	0	0	0	0	0	0	1.63011	1.83957
Dendrobium_GLEAN_10013764	35.6524	24.112	10.4325	16.4191	4.45423	24.0683	12.6237	6.94566
Dendrobium_GLEAN_10012043	26.2533	45.6032	28.5185	32.2551	37.0058	32.4793	23.3312	33.7915
Dendrobium_GLEAN_10117242	2.22257	2.87013	2.49721	2.1587	1.35496	1.10652	4.76255	2.74669
Dendrobium_GLEAN_10123356	10.5685	10.9847	10.6435	11.3987	10.6715	11.9541	10.2781	13.8387
Dendrobium_GLEAN_10058048	96.4221	95.5309	100.703	100.811	89.3422	104.017	129.539	106.742
Dendrobium_GLEAN_10005198	5.43709	7.76854	7.62106	9.965	7.03504	9.35887	15.9374	13.8633
Novel01163	1.18005	0.126989	0.0552446	0.40452	0.0654002	0.411248	1.02512	5.16024
Dendrobium_GLEAN_10013257	30.6056	42.183	29.6344	42.2184	25.5409	31.9102	31.4446	41.5437
Dendrobium_GLEAN_10074611	18.0212	4.40753	23.7761	4.68001	31.4155	16.3126	23.1506	29.7464
Dendrobium_GLEAN_10059013	1.51611	4.8349	0.420669	6.59789	0.166	0.28167	0.0578218	11.4369
Novel05356	9.8672	9.62841	14.5666	11.6733	20.3528	15.7568	17.5559	9.39415
Dendrobium_GLEAN_10133398	4.09589	6.50046	3.3645	6.2298	4.25768	5.42864	8.28836	7.8626
Dendrobium_GLEAN_10111623	0	0.0432942	0.0376689	0	0.0445935	0	0.046599	0.0382451
Dendrobium_GLEAN_10040898	25.6665	22.3902	19.0208	9.17283	3.72264	4.07816	5.69277	15.574
Dendrobium_GLEAN_10041728	0	0	0	0	0	0	0	0
Dendrobium_GLEAN_10108978	17.7266	11.2437	19.4484	13.2256	24.1332	26.1021	19.856	25.2177
Dendrobium_GLEAN_10045648	9.7458	8.66165	11.2077	6.72099	6.97715	8.42537	9.20331	7.6515
Novel01865	42.1844	66.1247	69.4002	63.0593	123.536	38.0909	11.334	31.3855
Dendrobium_GLEAN_10009065	0	0.0665417	0.289479	0.141311	0	0	0	0
Dendrobium_GLEAN_10124457	0	0	0	0	0	0	0	0
Novel05296	0.310292	0.343455	0.560305	0.592619	0.530644	1.03281	0.739345	0.834351
Dendrobium_GLEAN_10038092	25.6152	32.0748	26.1259	32.0117	28.117	24.9606	34.0479	36.2421
Dendrobium_GLEAN_10012497	0.280271	0	0.354267	0	0	0	0	0.119895
Dendrobium_GLEAN_10042669	0	0.561718	0	1.39171	0	0	0	0.661612
Dendrobium_GLEAN_10074913	0.131524	0.127383	0.0554161	0.0338146	0.0656031	0	0.308491	0.787692
Dendrobium_GLEAN_10031334	0	0	0	0	0	0	0	0
Dendrobium_GLEAN_10104632	0.31	0.675541	0.925189	0.996257	1.31432	0.891288	1.44075	0.850932
Dendrobium_GLEAN_10053094	0.133261	0.419464	0	0.171306	0	0	0	0.0855102
Dendrobium_GLEAN_10025638	136.897	0.140751	0.306157	0.224178	0	132.316	0	0
Dendrobium_GLEAN_10069344	0	0	0	0.1746	0	0	0.176987	0.435773
Dendrobium_GLEAN_10095264	0.896649	0.668016	0.813707	0.709315	0.550451	0.247238	2.01322	2.77351
Dendrobium_GLEAN_10076061	2.23251	0.982828	2.90743	0.834871	2.42958	1.09126	8.46281	2.60462
Dendrobium_GLEAN_10035678	0.932593	0	0.0523916	0.0639382	0	1.0586	0	0
Dendrobium_GLEAN_10089883	8.23997	17.5898	4.74718	13.1433	7.63293	9.2679	9.55391	15.6823
Dendrobium_GLEAN_10090006	18.5207	54.7425	46.7401	61.5808	42.313	20.037	21.2076	20.5255
Dendrobium_GLEAN_10053553	36.9765	68.2308	34.9832	38.7195	7.70912	4.87179	1.21774	22.0259
Dendrobium_GLEAN_10114500	0	0	0	0	0	0	0	0
Dendrobium_GLEAN_10037538	1.1089	1.27226	0.848187	1.38601	1.12324	0.733832	2.68541	1.82449
Novel04271	68.1269	43.3249	73.7837	38.9972	61.187	75.7224	103.84	93.5462
Dendrobium_GLEAN_10010519	2.75386	5.805	6.41581	7.82979	12.2816	2.61301	6.07925	21.3436
Novel03179	0	0.282405	1.22856	0.599729	1.26048	0.348402	1.9251	0.332627
Dendrobium_GLEAN_10071540	0	0	0	0	0	0	0	0
Novel03058	22.4323	23.8772	16.5169	24.4397	15.6204	24.7798	24.0791	42.09
Dendrobium_GLEAN_10114427	13.4651	10.5806	13.7374	12.8024	10.6025	13.2809	6.97421	11.3754
Dendrobium_GLEAN_10058842	86.4391	100.492	90.1518	103.174	114.585	117.358	86.8825	75.6897
Dendrobium_GLEAN_10023193	14.4855	14.1181	14.1083	16.0886	13.6596	16.9164	16.5628	11.0627
Dendrobium_GLEAN_10108991	24.6107	39.8088	38.0724	37.1406	53.2065	41.8582	75.0686	29.6529
Dendrobium_GLEAN_10014924	56.7549	57.4112	61.5607	63.2553	85.2655	61.3803	45.0052	89.8938
PEQU_13853-D1	14.6469	20.2655	17.787	21.1786	16.5525	14.9021	37.5403	22.2676
Dendrobium_GLEAN_10033982	132.669	140.463	126.067	139.572	112.572	119.825	185.07	227.701
Dendrobium_GLEAN_10112305	3.0634	4.69768	4.80437	4.55055	5.47533	3.62219	7.67312	3.23977
Dendrobium_GLEAN_10061821	14.68	3.57932	12.0245	2.85045	10.3434	17.2032	10.3805	4.74283
Dendrobium_GLEAN_10034758	0	0	0.0751475	0	0.0889618	0	0	0
Dendrobium_GLEAN_10008979	0.861321	0	0	0.14763	0	0	0.299295	0.491278
Dendrobium_GLEAN_10014358	6.26542	5.60846	3.7598	5.66231	5.11387	9.61305	8.7085	6.90365
Dendrobium_GLEAN_10031951	2.309	2.49941	1.0301	2.23489	2.43892	1.58232	1.13271	2.38223
Dendrobium_GLEAN_10067586	6.86909	9.08368	9.09079	11.3207	11.904	7.18162	9.54757	13.9389
Dendrobium_GLEAN_10116371	0	0	0	0	0	0	0	0
Dendrobium_GLEAN_10024980	9.22444	13.4586	9.84163	14.1685	3.63347	1.84486	0.536516	9.31473
Dendrobium_GLEAN_10049593	16.3798	10.479	20.5143	10.4315	20.6126	15.1499	9.55577	12.4069
Dendrobium_GLEAN_10082848	0	0.0291332	0.0506958	0	0.0300076	0	0	0
Dendrobium_GLEAN_10103438	131.016	153.056	166.647	146.993	158.178	143.912	86.327	92.6802
Novel04247	1.09172	1.49792	1.9741	1.68408	1.24791	0.611461	3.58016	2.60753
Dendrobium_GLEAN_10043430	6.27291	11.4758	5.67759	8.12352	8.34368	3.95581	2.90631	7.5534
Dendrobium_GLEAN_10031241	0.82126	0.729121	1.15343	0.844579	1.0241	1.10395	0.856122	1.52239
Dendrobium_GLEAN_10109307	0.150401	0.116533	0.228131	0	0.180045	0.107825	0.564428	0.64339
Novel02442	0.747126	0.217082	4.65893	0.153668	9.91278	1.40601	0.545189	1.98157
Dendrobium_GLEAN_10078752	4.75267	0.145666	11.7107	2.56755	10.7427	21.3762	0.721213	3.91181
Dendrobium_GLEAN_10099949	4.07471	3.6541	11.6999	3.10401	9.33415	2.2991	0.314643	0.516472
Dendrobium_GLEAN_10139150	0	0	0.232488	0	0.550451	0	0	0.413077
Novel02332	15.3999	8.56823	49.6076	10.5581	67.5523	20.3582	0.569277	35.976
Dendrobium_GLEAN_10019998	22.048	26.6019	12.8323	20.6564	13.7933	17.8325	10.5181	7.27364
Dendrobium_GLEAN_10106863	22.9377	24.1335	14.1144	25.2012	17.6144	28.6889	25.4596	32.9667
Dendrobium_GLEAN_10054917	0	0	0	0	0	0	0	0
Novel01437	0.0332317	10.3852	5.41402	10.731	5.63574	0.0496338	2.59817	2.21769
Novel03639	5.6298	17.3491	0.10782	18.8164	0	12.2688	120.577	29.4473
Dendrobium_GLEAN_10104139	0	0	0	0	0	0	0	0
Dendrobium_GLEAN_10032230	10.8193	8.04763	16.1191	7.12096	15.4558	11.4796	21.8353	16.9581
Dendrobium_GLEAN_10112357	45.1882	30.9397	52.8604	40.3787	48.7874	47.3656	21.5551	31.5056
Dendrobium_GLEAN_10046000	0	0	0	0	0	0.20093	0.0584337	0
Dendrobium_GLEAN_10096009	0.120526	0	0.330085	0	0.0601176	0.0540043	0.0314106	0
Dendrobium_GLEAN_10033499	229.717	290.213	160.725	218.8	149.81	253.799	182.244	188.312
Dendrobium_GLEAN_10008951	0	0	0	0	0	0	0	0
Dendrobium_GLEAN_10011827	0	0	0	0	0	0	0.301748	0
Dendrobium_GLEAN_10132479	0	0	0	0.0921749	0	0	0	2.07048
Dendrobium_GLEAN_10093680	103.639	39.8008	25.1539	41.5183	56.5374	8.29608	10.3567	6.95454
Dendrobium_GLEAN_10091173	1.22097	1.54639	0.395724	0.7727	1.31171	1.68332	1.2728	1.52675
Dendrobium_GLEAN_10014852	29.2379	13.1548	42.7702	16.1735	44.7849	34.0808	34.1305	15.8407
Dendrobium_GLEAN_10039115	44.7862	36.795	58.7794	48.0696	66.4008	63.2007	46.741	46.3334
Dendrobium_GLEAN_10084720	13.3249	11.7611	10.786	14.3107	12.6379	16.8821	1.8475	11.4565
Dendrobium_GLEAN_10009477	0	0	0	0	0	0	0.120305	0
Dendrobium_GLEAN_10010750	0	0	0	0	0	0	0	0
Dendrobium_GLEAN_10019955	0.360349	1.62869	0.607315	2.34701	0.479305	0.538206	0.375645	1.23321
Dendrobium_GLEAN_10141237	0	0	0	0	0	0	0	0
Dendrobium_GLEAN_10043485	2.44236	3.0247	2.39552	2.14113	2.756	1.72226	14.1493	4.07644
Novel02011	0.184826	0.895039	1.68209	0.532209	1.36441	1.75568	2.58181	1.70782
Dendrobium_GLEAN_10041251	0.246092	0.595861	4.14751	0.632699	1.65711	0.882132	9.04297	7.52708
Dendrobium_GLEAN_10143310	0	0	0	0	0	0	0	0
Novel04085	4.41135	5.28973	4.86795	4.89666	5.34371	6.65141	2.91975	4.01384
Novel02578	0.238073	1.26818	0.200619	1.59141	0.237498	0.320021	1.48907	1.01844
Dendrobium_GLEAN_10048422	0	0	0	0	0	0	0	0
Dendrobium_GLEAN_10016407	0	0	0	0	0	0	0	0
Dendrobium_GLEAN_10011321	85.7472	87.8575	69.9323	80.5781	68.256	68.8311	76.2724	74.7787
Dendrobium_GLEAN_10135688	52.9082	63.5798	41.8743	59.1447	46.867	66.0621	24.9804	45.752
Dendrobium_GLEAN_10049197	0	1.41071	0	2.59843	0	0	0	0
Dendrobium_GLEAN_10121674	1.20179	1.61163	1.86964	1.71127	0.645556	0.745598	4.04753	2.92645
Novel04847	0	8.50336	0.123308	9.17955	0.145976	0	0.152541	0.625972
Dendrobium_GLEAN_10021514	810.08	774.089	1299.67	725.134	1547.35	1421.56	1372.77	2896.92
Novel01573	91.1232	118.182	79.3115	102.628	73.9178	88.7232	37.9636	38.9809
Dendrobium_GLEAN_10084437	20.2881	14.3265	16.4558	15.8736	17.7894	20.2244	22.734	18.7084
Dendrobium_GLEAN_10108521	36.223	30.0529	26.9139	31.7773	32.1205	45.3755	11.3688	17.6616
Dendrobium_GLEAN_10098264	0.650524	0.0900064	1.95779	0	1.11249	0.0832803	0	0.556566
Novel02231	15.2417	11.4776	16.1826	13.2885	12.3562	15.2901	10.7909	16.0942
Dendrobium_GLEAN_10107242	0.590538	0	0.0497632	0.0607306	0	0.211682	0	0.0505244
Dendrobium_GLEAN_10115608	4.92756	6.13598	1.28525	6.33434	2.75043	14.509	3.48564	5.82189
Dendrobium_GLEAN_10093134	274.406	328.129	337.322	331.435	350.214	321.258	518.084	380.321
Dendrobium_GLEAN_10008541	4.08952	10.9038	7.37879	13.6559	9.0232	3.01806	3.20987	4.07513
Dendrobium_GLEAN_10041833	3.79722	0.367768	4.47976	0.781009	4.16686	2.21185	0	0
Dendrobium_GLEAN_10045348	0	0	0	0	0	0	0	0
Dendrobium_GLEAN_10061801	0.667705	0.574831	0.437624	0.915552	0.666092	1.86156	1.54677	0.952109
Novel00110	3.73037	9.53814	7.67013	10.2813	4.46563	4.68012	0	13.7876
Dendrobium_GLEAN_10105279	1.9827	1.97363	1.53155	1.34801	0.83512	1.04633	1.11381	2.32775
Dendrobium_GLEAN_10099515	7.10343	6.2901	0.855127	2.08718	2.63204	3.27378	0.423141	0
Dendrobium_GLEAN_10131599	0	0	0	0	0	0	0	0
Dendrobium_GLEAN_10141678	38.385	42.8769	41.8343	42.6329	41.3557	51.1389	25.0757	30.2136
Dendrobium_GLEAN_10027294	0	0	0	0	0	0	0	0
Novel03475	9.10037	9.52356	12.7878	16.5541	17.7088	23.3006	115.811	33.2875
Dendrobium_GLEAN_10127409	0.14473	0.420521	0.975686	0.446519	0.577523	0	0.150874	0
Dendrobium_GLEAN_10014534	0.0517803	0	0.130902	0	0.154966	0.0464025	0.0539783	0.354412
Dendrobium_GLEAN_10044079	38.0988	38.3092	49.544	47.0558	52.4645	42.3088	31.7992	57.3409
Dendrobium_GLEAN_10061554	12.0812	12.0866	14.5436	15.8374	14.8332	11.1833	16.1923	21.4676
Dendrobium_GLEAN_10011193	49.6284	32.21	43.1208	25.034	35.3999	37.0233	17.6918	15.3268
Dendrobium_GLEAN_10054742	0	0	0	0	0	0	0	0
Dendrobium_GLEAN_10042006	0	0	0	0	0	0	0	0
Novel00902	16.4672	1.56141	16.8847	14.4478	15.3935	74.5069	5.16185	0.886704
Dendrobium_GLEAN_10063683	0.452746	0.657739	0.190759	0	0.790392	0.202862	0	0.387354
Dendrobium_GLEAN_10009551	0	0	0	0	0	0	0	0
Dendrobium_GLEAN_10073486	0	0	0	0	0	0	0.054619	0
Novel00967	0	0	0.33992	0	0.475572	0	0.210252	0
Dendrobium_GLEAN_10029937	0	0.265822	0.0770944	0	0	0	0	0
Dendrobium_GLEAN_10028092	0.0954437	0.231097	0.0402141	0.196308	0	0.128297	0.0994952	0.530779
Dendrobium_GLEAN_10022391	0	0	0	0	0	0	0	0
PEQU_29608-D1	74.3179	71.2125	123.808	70.8722	109.236	80.8875	117.583	81.96
Dendrobium_GLEAN_10091648	0	0.481724	0.628699	0.127876	0.496182	0	0	0.212772
Dendrobium_GLEAN_10009352	43.2145	28.3069	10.6592	27.837	4.17751	6.73165	1.53013	9.75109
Dendrobium_GLEAN_10005209	2.29856	1.21429	1.05651	2.68616	0.104227	0.0936287	0	2.05596
Dendrobium_GLEAN_10067937	112.47	92.9625	175.095	80.6803	190.712	139.822	27.7408	48.578
Dendrobium_GLEAN_10073944	27.1939	21.8543	31.1867	26.9775	28.92	33.6414	20.9382	28.98
Dendrobium_GLEAN_10039189	4.07471	7.93985	6.29505	8.77991	5.32305	7.2161	0.606811	3.19567
Novel05573	8.09958	24.7889	23.2061	13.3273	25.6945	16.2588	16.8868	9.9788
Dendrobium_GLEAN_10097883	269.694	325.86	305.635	306.952	448.806	345.727	150.279	287.236
Novel05625	10.3845	16.5594	15.0265	13.5919	22.8116	10.9039	15.4178	11.2179
Dendrobium_GLEAN_10018256	34.356	28.3694	75.2034	27.3081	71.1405	67.5861	16.9797	40.2262
Dendrobium_GLEAN_10131373	9.52292	17.2293	11.5913	7.14096	12.5346	6.69673	48.257	8.03433
Novel04144	0	0	6.15691	0.313077	5.16285	0.136407	0	0
Dendrobium_GLEAN_10034481	67.5804	66.6744	90.3381	68.7427	167.547	70.6395	258.679	256.816
Dendrobium_GLEAN_10015696	3.85075	8.64157	6.80645	10.528	9.93155	6.90163	4.40584	8.75873
Dendrobium_GLEAN_10135073	0	0	0	0	0	0	0	0
Dendrobium_GLEAN_10026549	188.391	149.954	154.449	186.837	196.962	273.311	181.632	121.354
Dendrobium_GLEAN_10111607	9.85136	11.4182	11.1594	11.5151	10.9016	7.09152	12.2898	8.42849
Dendrobium_GLEAN_10021139	9.35111	11.0279	7.78725	10.4086	7.46282	8.18274	13.0739	14.4479
Dendrobium_GLEAN_10113031	0.399783	0.580796	0.673776	0.411135	0.531757	0.298552	2.77836	0.855102
Dendrobium_GLEAN_10101697	0.689431	2.04027	0.258208	1.33924	0.0382092	0.686475	0.638841	3.17865
Dendrobium_GLEAN_10100264	15.2742	18.4167	11.3853	20.903	11.0536	12.2999	7.02979	13.6797
Dendrobium_GLEAN_10123695	49.6245	46.1621	51.0561	48.6599	45.4752	59.0528	17.3239	40.6798
Dendrobium_GLEAN_10033276	0	0	0	0	0	0	0	0
Dendrobium_GLEAN_10083438	33.8579	26.7978	38.8087	42.6817	49.9379	50.0798	53.7018	30.5251
Novel00050	12.7409	13.7607	10.4111	14.5321	7.39499	10.4489	2.65635	2.77472
Dendrobium_GLEAN_10124816	0.0294285	0.28502	0.123993	0.514489	0.205502	0	0.582876	0.906408
Dendrobium_GLEAN_10133946	0	0	0.0549048	0	0	0	0.0679211	0
Novel02950	12.9762	4.21792	5.69205	5.11849	5.85178	14.4958	5.46639	7.75618
Dendrobium_GLEAN_10039085	105.596	99.0864	100.799	108.001	94.692	105.23	86.6194	85.9508
Dendrobium_GLEAN_10046362	0.692435	0.335318	1.167	0.534072	0.690763	0.930779	0.180457	1.77727
Dendrobium_GLEAN_10052699	65.4655	57.104	66.5649	73.5895	69.0157	94.1067	66.3069	53.183
Dendrobium_GLEAN_10130123	20.3897	22.5667	26.4474	21.6172	35.3579	24.4449	27.5088	23.1306
Novel00208	5.40368	5.33184	6.71275	6.57461	6.09925	6.07013	7.16694	6.46814
Dendrobium_GLEAN_10030612	37.3321	12.3547	74.3961	26.9783	53.7061	21.7005	13.4481	103.158
Dendrobium_GLEAN_10064856	33.3383	16.3683	14.2415	11.2409	8.76528	17.5563	51.6262	18.9914
Dendrobium_GLEAN_10064836	8.50633	5.36753	8.03695	10.736	7.32864	11.3188	10.3453	4.74155
Novel05064	20.1633	18.8665	22.6068	23.196	29.1491	31.3913	22.9786	50.4372
Dendrobium_GLEAN_10007339	4.10341	1.20431	0.31435	1.79027	0	4.01153	5.18496	5.63845
Dendrobium_GLEAN_10056506	139.061	132.556	131.84	152.495	155.288	179.645	138.095	185.265
Dendrobium_GLEAN_10092190	0	0	0	0	0	0	0	0
Dendrobium_GLEAN_10030860	9.6133	19.9514	6.28233	9.68451	1.1743	1.05488	1.84066	1.51068
Dendrobium_GLEAN_10105786	19.1978	17.8473	17.9433	18.8239	14.11	16.7621	9.50848	15.4495
Dendrobium_GLEAN_10045966	1.61042	1.50401	1.79326	0.887221	0.860641	1.03083	1.85865	1.67307
Dendrobium_GLEAN_10076405	32.9281	58.2365	80.3477	53.8864	75.4089	35.0677	55.3193	49.5666
Dendrobium_GLEAN_10000820	0.237008	0.573866	0.0998605	0.365606	0.236436	0.955767	29.1541	5.47495
Dendrobium_GLEAN_10033506	0	0	0	0	0.162595	0	0	0
Dendrobium_GLEAN_10044518	2.17634	1.71012	2.31839	1.73139	1.96626	3.16465	5.99285	3.86453
Dendrobium_GLEAN_10121351	0	0	0.273013	0	0.323201	0.58067	0.168868	0
Dendrobium_GLEAN_10002182	10.2687	10.0667	18.3616	8.4997	15.1159	12.1199	9.66021	6.64271
Dendrobium_GLEAN_10086147	164.611	214.262	169.408	195.306	174.285	124.183	22.2495	73.4732
Dendrobium_GLEAN_10096513	301.583	470.215	119.272	284.725	364.408	504.445	644.379	160.616
Dendrobium_GLEAN_10004587	0	0	0	0	0	0	0	0
Dendrobium_GLEAN_10132901	0.172545	0.38993	3.53805	0.236592	0.975393	1.54625	0.779433	0.492078
Dendrobium_GLEAN_10020479	0	0	0.13777	0.168134	0	0	0	0
Dendrobium_GLEAN_10015382	0	0	0	0	0	0	0	0
Dendrobium_GLEAN_10018848	0	0.0189803	0.0825705	0	0	0	0.0408582	0
Dendrobium_GLEAN_10138122	1.01478	1.83461	1.08316	1.39145	0.742371	1.27313	1.97466	2.48886
Dendrobium_GLEAN_10083353	8.04668	12.0213	6.72584	6.96856	5.91481	6.45191	6.07894	9.53234
Dendrobium_GLEAN_10060473	40.0816	44.6342	18.7974	49.8147	11.743	18.5132	9.0806	42.0473
Os04t0221300-01-D92	0	0	0	0	0	0	0	0
Novel00200	76.0781	96.6957	74.5797	117.918	68.2832	87.9069	37.9494	56.6971
Novel00748	7.62	11.1892	9.73535	9.60586	11.0346	10.353	12.812	8.09668
Dendrobium_GLEAN_10124825	7.94047	8.70239	5.72277	7.09147	6.04519	4.58781	7.07947	8.13443
Novel05084	1.97613	2.2329	2.22032	2.03224	2.84752	2.45957	2.5178	3.78061
Dendrobium_GLEAN_10138623	1.78555	2.57479	2.4743	2.85639	2.0979	2.9513	2.8127	2.64793
Os01t0960500-01-D1	23.2968	39.1031	24.7839	37.6178	25.5541	25.4589	52.5825	45.3204
Novel04522	19.1118	53.0526	3.80434	65.618	4.50369	4.72	0.627498	7.08131
Novel00766	0.540523	0.904238	0.910972	0.960141	0.980396	0.61649	1.22938	1.55552
Dendrobium_GLEAN_10112687	3.85795	5.57546	4.49434	4.96248	3.95722	4.4977	7.60218	10.2437
Dendrobium_GLEAN_10109048	22.0714	30.0981	26.3362	35.7721	15.6769	14.5574	20.9835	16.6175
Dendrobium_GLEAN_10018524	8.4426	19.4374	12.3587	16.4716	10.636	7.52253	2.3134	10.2776
Dendrobium_GLEAN_10033581	32.6306	33.1854	38.7384	35.277	40.9322	40.0809	56.3956	42.0595
Dendrobium_GLEAN_10015005	0	0.140174	0.975686	0.14884	0.577523	0	0	0
Dendrobium_GLEAN_10124660	28.946	30.3897	29.8072	29.4107	28.2409	30.1161	41.1886	37.4698
Dendrobium_GLEAN_10077778	0	0	0	0	0	0	0	0
Dendrobium_GLEAN_10093076	0	0	0	0	0	0	0	0
Dendrobium_GLEAN_10008277	8.20682	12.6453	15.4555	15.473	20.2814	11.8674	18.1474	19.6814
Dendrobium_GLEAN_10073004	9.7017	8.26872	6.54031	10.7753	5.41983	13.7367	9.91125	10.7906
Dendrobium_GLEAN_10123697	14.8507	16.1574	16.8828	14.0698	16.9923	17.2554	7.02946	27.4457
Dendrobium_GLEAN_10093182	16.6003	23.6048	24.1184	25.5622	25.1039	22.117	20.082	22.5283
Dendrobium_GLEAN_10009903	0.0936716	0	0	0	0	0	0	0
Dendrobium_GLEAN_10134677	95.895	161.496	182.784	136.53	255.52	167.899	170.126	211.811
Dendrobium_GLEAN_10072539	0.312515	0.151338	0	0	0	1.19024	0	0
Dendrobium_GLEAN_10086810	159.154	79.3403	397.69	294.488	739.927	88.6963	87.7758	794.7
Dendrobium_GLEAN_10081195	5.84242	11.317	11.1594	9.47978	12.3042	8.72606	5.6844	3.99886
Dendrobium_GLEAN_10094857	16.3793	19.4639	13.4109	17.3222	13.1529	10.7744	17.1351	12.0755
Dendrobium_GLEAN_10115259	18.8004	17.4703	23.2822	16.5908	25.1861	17.417	14.7981	14.1558
Dendrobium_GLEAN_10115396	21.1557	24.0899	27.8006	25.2138	28.8212	27.36	20.2587	19.3395
Dendrobium_GLEAN_10041232	0	0	0	0	0	0	0	0
Dendrobium_GLEAN_10116840	3.49365	2.37771	4.05797	3.49574	4.99233	4.06158	2.95293	5.17024
Dendrobium_GLEAN_10055065	8.88205	82.9149	16.0515	135.033	10.1417	7.28828	33.2435	76.0833
Dendrobium_GLEAN_10118622	29.1585	41.4194	47.3678	56.8076	63.3474	36.437	49.8161	22.1751
Dendrobium_GLEAN_10017341	15.8073	14.4953	19.9807	19.542	17.4467	14.7684	6.31084	14.0997
Dendrobium_GLEAN_10101088	0	0	0	0	0	0	0	0.0799302
Dendrobium_GLEAN_10133102	93.6421	39.7747	51.9936	49.3747	23.354	110.763	4.75677	13.0699
Dendrobium_GLEAN_10022772	3.90196	4.67632	2.53112	5.34072	1.17616	0.981092	0.409686	4.92352
Dendrobium_GLEAN_10112361	1.76571	4.38492	2.44172	4.23697	1.30979	1.66347	2.643	3.0601
Novel01820	0.664861	0.573683	0.488956	0.422675	0.627077	1.29995	1.34836	0.548147
Dendrobium_GLEAN_10067611	11.2218	7.72645	14.3414	5.6335	18.3042	14.2028	14.4703	11.4211
Dendrobium_GLEAN_10088221	0.0557006	0.0269735	0.0234688	0	0.0555661	0.0249578	0.435488	0.21445
Dendrobium_GLEAN_10055459	8.86548	9.51657	12.2229	8.78798	10.0478	10.1516	10.4484	12.9999
Novel05887	0.031872	2.19167	1.15488	2.09773	1.43078	0	0	0
Dendrobium_GLEAN_10082707	0	0	0	0	0	0	0	0.136097
Novel04755	0.504488	1.32622	1.51829	1.40821	2.15687	0.516677	2.10361	1.41819
Dendrobium_GLEAN_10040429	0	0	0	0	0	0	0	0
Dendrobium_GLEAN_10028269	0	0	0	0	0	0	0	0
Dendrobium_GLEAN_10057552	3.10076	4.58813	4.06456	5.40325	2.4918	3.55058	1.70598	2.87398
Dendrobium_GLEAN_10120432	249.631	187.104	305.438	201.47	295.114	332.651	277.125	286.435
Dendrobium_GLEAN_10105630	0	0	0	0	0	0	0.0615606	0
Dendrobium_GLEAN_10128178	0.195106	1.13378	0.411028	0.802583	1.16781	0.437106	0.101694	0.667704
Dendrobium_GLEAN_10018304	16.486	23.4705	17.0048	30.9435	11.4134	4.4402	2.91125	15.5693
Dendrobium_GLEAN_10108386	8.6758	14.8526	8.23762	14.8284	9.32529	8.48652	7.35628	10.6898
Dendrobium_GLEAN_10044498	3.53903	3.86989	1.41096	4.42221	0.683319	0.204611	0	1.56277
Dendrobium_GLEAN_10021180	0	0	0	0	0	0	0	0
Novel01747	0.390452	1.24252	0	1.68264	0	0.866419	0.600848	0
Dendrobium_GLEAN_10035203	0	0.879034	0.208587	0.169705	0	0	0	0.0705925
Dendrobium_GLEAN_10011290	0	0	0	0	0.0957307	0	0.200072	0
Dendrobium_GLEAN_10055886	0.0437057	0.380967	0.220978	0.179787	0.218001	0.0783329	0.227805	0.0747861
Dendrobium_GLEAN_10019812	0	0	0	0	0	0	0	0
Dendrobium_GLEAN_10108668	18.2825	18.5923	26.961	24.6401	32.3491	31.3016	14.9961	39.3106
Novel04445	0.601946	2.11336	0.253623	3.32733	0.450369	0.876572	1.09812	1.99564
Dendrobium_GLEAN_10138243	0	0	0	0	0.260955	0.117209	0	0.223804
Dendrobium_GLEAN_10100564	6.90298	6.26341	7.96007	9.11659	7.90113	13.2186	12.8013	7.58448
Dendrobium_GLEAN_10045530	0	0	0	0	0	0	0	0
Dendrobium_GLEAN_10027569	2.64133	5.15139	4.90892	3.86983	4.80066	7.68465	4.26219	3.93148
Dendrobium_GLEAN_10055229	0.856407	0.0243954	0.233483	0.0777109	0.427169	1.03833	1.33914	2.26279
Novel01161	5.68618	5.7004	0.924697	7.89944	0.497583	0.178794	0.103992	4.8649
Dendrobium_GLEAN_10017831	0	5.87526	4.10776	3.78765	5.18708	0	4.74281	5.09739
Dendrobium_GLEAN_10048376	0	0	0	0	0	0	0	0
Dendrobium_GLEAN_10110384	0	0	0	0	0	0	0.189759	0
Dendrobium_GLEAN_10029824	9.69409	19.3367	21.2004	21.9563	28.6666	18.8224	20.0909	22.5121
Dendrobium_GLEAN_10072765	52.4519	46.475	56.716	51.6982	51.0819	55.3814	43.7428	59.3608
Novel01077	3.21038	5.28583	1.89372	2.97138	4.48368	3.74004	4.01599	4.94404
Dendrobium_GLEAN_10080210	0	0.100007	0.174026	0	0	0	0.107641	0
Dendrobium_GLEAN_10099952	7.58425	30.2427	17.5754	30.8328	21.2792	6.53107	17.233	23.5727
Dendrobium_GLEAN_10029216	34.4476	39.2384	39.1606	40.1046	40.8482	27.6664	23.714	20.3895
Novel04095	1.51967	2.94365	1.09765	4.24193	2.16571	0.778193	2.48942	2.60035
Dendrobium_GLEAN_10132872	29.0823	27.5476	24.6416	31.4692	29.6497	29.5701	14.7419	17.5676
Dendrobium_GLEAN_10080770	5.21996	4.3962	2.56274	4.80802	2.98857	6.30489	2.79175	4.89321
Dendrobium_GLEAN_10038297	94.5653	150.909	126.937	144.093	185.826	142.665	93.9035	112.237
Dendrobium_GLEAN_10016000	70.7819	54.4265	68.8325	55.107	67.0881	81.0425	88.6719	69.4913
Dendrobium_GLEAN_10028650	33.7081	33.6252	35.0104	33.8134	36.5893	39.0693	44.4897	22.0552
Novel00802	27.2056	32.6611	24.4581	30.9395	27.669	27.2323	22.4355	18.4783
Dendrobium_GLEAN_10049713	1.77189	3.01316	3.48976	3.22064	4.13128	2.97263	3.67273	3.52551
Dendrobium_GLEAN_10095598	12.0037	10.5382	19.5779	11.7472	15.9921	15.5109	17.0746	12.1915
Dendrobium_GLEAN_10053285	3.93426	11.9234	6.09128	4.23955	7.84951	5.51621	10.1452	5.39529
Dendrobium_GLEAN_10010700	0.673935	0	0	0	0	0.362364	0.983559	0
Novel03825	0	0	0	0.0299974	0	0	0	0
Dendrobium_GLEAN_10033470	14.2742	10.2288	15.3659	13.3219	20.413	16.8584	19.3527	10.7301
Dendrobium_GLEAN_10083606	7.86042	15.4867	14.0904	11.4858	17.7935	5.36634	2.17885	8.82053
Dendrobium_GLEAN_10032884	0	0	0	0	0	0	0	0
Novel05066	0.367128	1.1937	0.243076	0.94388	0.18312	0.0704996	0	0.0673075
Dendrobium_GLEAN_10007181	0	0	2.5731	0	0	0	0	0
Dendrobium_GLEAN_10035624	0	0	0	0	0	0	0	0
Dendrobium_GLEAN_10109953	0.381088	0.615151	0.856357	0.261273	0.887058	0.455345	0	2.49969
Novel03792	2.14942	0.925223	1.24776	1.22803	1.52479	1.49814	0.19917	2.41109
Dendrobium_GLEAN_10060169	0	0	0	0	0	0	0	0
Dendrobium_GLEAN_10018237	0	0.820858	2.26164	1.74321	2.11373	0	5.15385	0.241709
Dendrobium_GLEAN_10085118	26.784	30.3266	26.7264	30.7214	29.871	31.0331	23.9871	22.7203
Dendrobium_GLEAN_10129574	60.5781	86.0865	72.2205	89.5596	74.275	73.0018	70.022	70.8402
Dendrobium_GLEAN_10078429	60.0891	42.9897	50.7644	40.5266	56.1346	50.1252	56.6847	43.5954
Dendrobium_GLEAN_10132485	0	0	0	0	0	0	0	0
Dendrobium_GLEAN_10027662	23.7717	26.6019	16.3671	20.5796	16.2118	14.7391	4.60165	13.9039
Dendrobium_GLEAN_10032710	15.8244	17.1353	13.2755	13.5192	13.5712	15.0968	4.51899	25.5398
Dendrobium_GLEAN_10029618	0	0	11.4177	0	12.4157	0	0	0
Dendrobium_GLEAN_10070902	0.973225	1.51487	1.4352	1.28682	1.83773	2.14922	2.78998	2.08165
Dendrobium_GLEAN_10002451	40.7317	86.8016	126.53	112.734	88.606	28.29	32.9785	91.3275
Dendrobium_GLEAN_10030567	1.30793	2.53351	1.3777	2.35387	1.46787	0.146512	0.340863	2.5178
Dendrobium_GLEAN_10020082	4.17173	1.87925	1.47157	1.3968	0.580696	0.695527	0	0.0830044
Dendrobium_GLEAN_10082458	16.8723	30.0221	26.0111	29.5916	24.6602	16.0577	11.044	20.59
Dendrobium_GLEAN_10107027	79.846	64.9846	65.0146	69.9254	61.0236	71.0169	56.031	47.8297
Dendrobium_GLEAN_10066701	0.58857	1.4365	1.78551	0.823183	1.9963	1.47684	3.70586	4.3709
Novel02679	2.47109	9.79077	5.11118	8.40926	4.03384	1.97287	3.3722	4.26681
Dendrobium_GLEAN_10118500	56.7281	73.3169	65.8484	67.8044	64.4614	70.363	43.6668	50.1417
Novel01864	6.89265	12.1151	12.2619	11.1576	8.91333	7.89256	10.5117	7.5352
Dendrobium_GLEAN_10048696	9.74184	14.3886	17.5472	14.2763	16.2782	10.9126	37.7018	16.9821
Novel04029	1.84698	1.00174	8.03104	1.74747	7.14896	1.65515	3.77374	1.95946
Novel04666	0.0696532	0.546429	0.0410866	0.544395	0.055588	0.0873868	0	1.60901
PEQU_15170-D4	6.1416	6.24566	0.258769	7.26338	0	9.08117	26.5695	6.8309
Dendrobium_GLEAN_10085296	0.0320455	0	0	0	0	0	0	0
Dendrobium_GLEAN_10035029	6.43964	6.39786	10.3629	6.87885	10.0299	7.59516	16.6309	5.43845
Novel05563	29.3113	15.6903	71.2424	12.6308	36.0056	20.3924	7.46214	16.9549
Dendrobium_GLEAN_10089980	0.215989	0.0784459	0	0.138826	0	0	0	0.138595
Dendrobium_GLEAN_10090290	4.82712	7.34081	8.63494	9.01391	12.0809	6.18511	11.7855	16.2298
Dendrobium_GLEAN_10034126	0.226373	1.53472	0.667657	0.698402	0.451652	0.405724	0.353973	0.290515
Dendrobium_GLEAN_10103509	183.147	153.498	51.0511	118.719	70.883	235.657	318.181	110.592
Dendrobium_GLEAN_10091234	3.04871	4.06	2.30146	4.70291	2.15428	4.55345	13.4408	11.0312
Dendrobium_GLEAN_10064428	6.69752	13.622	4.92553	9.32969	3.94807	5.40173	16.439	56.6766
Dendrobium_GLEAN_10065118	8.12539	4.54014	7.24209	4.17805	2.18232	2.10043	7.98163	3.20852
Dendrobium_GLEAN_10024559	32.0718	26.068	48.1928	29.4874	81.1356	110.868	2.44336	43.4153
Novel05685	4.9585	10.0733	1.52869	9.32797	0.723881	1.5173	0.504291	7.96729
Dendrobium_GLEAN_10068202	6.36725	6.37409	4.3285	5.50256	4.53705	5.61006	6.86065	2.79247
Dendrobium_GLEAN_10069896	85.0221	96.032	96.9358	92.4403	125.888	116.847	99.0798	128.034
Dendrobium_GLEAN_10083448	9.03313	14.0529	13.3674	14.7274	13.4385	9.02574	7.11985	8.644
Dendrobium_GLEAN_10024118	24.0437	20.4851	27.764	22.9492	27.0588	26.7649	35.56	42.6847
Dendrobium_GLEAN_10089321	102.126	105.857	87.1547	112.66	101.21	97.3073	77.9986	87.196
Dendrobium_GLEAN_10135682	33.9202	36.1526	43.985	35.6798	46.0448	46.4981	18.5681	37.6345
Dendrobium_GLEAN_10030892	0	0	0	0	0	0	0	0
Dendrobium_GLEAN_10136779	3.98224	8.8053	3.29242	6.87703	5.32181	6.59863	5.95278	7.48912
Dendrobium_GLEAN_10135376	0	0	0	0	0	0	0	0
Dendrobium_GLEAN_10014989	0	0	0	0	0	0.1895	0	0
Dendrobium_GLEAN_10116227	8.11021	7.24894	10.8958	10.0563	12.4827	15.6779	13.9861	34.0993
Dendrobium_GLEAN_10024827	10.4337	13.8192	9.54374	10.6383	7.73968	8.07145	4.46221	11.5208
Dendrobium_GLEAN_10118273	77.6491	75.3405	42.8924	62.1286	36.3495	41.6501	30.3361	56.5229
Novel02047	3.40104	11.2819	4.60945	12.8537	4.41068	4.44473	2.48179	3.34629
Dendrobium_GLEAN_10105827	0.073879	0	0	0	0	0	1.15523	0
Dendrobium_GLEAN_10077244	1.44946	0.446673	0.333117	0.74531	0.657255	0.29521	4.18956	0.507318
Dendrobium_GLEAN_10034279	14.435	12.7323	16.8341	19.0863	20.443	18.3642	12.8981	19.8484
Dendrobium_GLEAN_10022292	0	0	0	0.16433	0.23911	0	0	0.273426
Dendrobium_GLEAN_10103112	56.282	55.2583	55.4251	70.7045	59.779	60.1283	41.0698	37.8614
Dendrobium_GLEAN_10081045	19.7759	39.1452	15.0136	33.5287	2.20465	1.22503	0.688764	38.2251
Dendrobium_GLEAN_10012197	4557.54	2330.95	848.566	1288.42	482.262	2986.4	421.958	828.814
Dendrobium_GLEAN_10077540	5.73381	3.56735	4.09578	3.90504	2.50011	3.19868	1.66253	2.40409
Dendrobium_GLEAN_10095053	0.539148	0.0652718	1.59014	0.277228	0.605076	0.181182	3.02093	0.115319
Dendrobium_GLEAN_10140436	1.12897	1.44332	1.21774	1.34679	0.765845	1.01172	1.08274	0.502272
Dendrobium_GLEAN_10033776	12.2969	0	0	0	0.104848	12.6209	9.42243	0.0899214
Dendrobium_GLEAN_10072085	0.945915	39.3939	38.4601	45.1529	29.0167	1.69535	36.1558	9.8464
Dendrobium_GLEAN_10126053	0	0	0	0	0	0	0	0
Dendrobium_GLEAN_10079033	0	0	0	0	0	0	0	0
Dendrobium_GLEAN_10031423	0	0	0	0	0	0.152882	0	0
Dendrobium_GLEAN_10091511	0.0671372	0.0650236	0.396025	0.207131	0.736726	0.240658	2.44955	1.66577
Dendrobium_GLEAN_10105418	1.67207	0.647773	0.281803	0.275128	0.733935	2.51733	0.836664	1.54501
Dendrobium_GLEAN_10131657	28.6167	27.0418	34.8159	27.4613	37.3114	30.0876	12.6942	11.758
Dendrobium_GLEAN_10096109	5.71448	2.61182	3.11111	3.59867	3.58694	5.9553	4.31719	5.32858
Dendrobium_GLEAN_10089495	0.05118	0	0	0	0.204225	0	0	0
Dendrobium_GLEAN_10028686	0	0.0555234	0.0483091	0	0	0	0.717141	0.0490481
Dendrobium_GLEAN_10053943	0	0.92439	0.100535	0.613461	0.595083	0.320742	0.373107	0.408292
Dendrobium_GLEAN_10100699	1.01311	30.2775	21.4651	30.2145	21.6571	0.518795	0.150874	28.8515
Dendrobium_GLEAN_10111598	0.107665	0	0	0	0.107405	0.28945	0.336706	0.644802
Dendrobium_GLEAN_10082069	57.163	49.5432	22.2563	28.2295	35.4879	43.0485	12.2195	30.3723
Novel05765	0	0	5.09451	0	2.58473	0	1.05038	0
Dendrobium_GLEAN_10030980	0	5.4877	5.32987	3.92981	4.99514	0.118084	1.51099	10.71
Dendrobium_GLEAN_10031222	0	1.25409	0	1.21056	1.29173	0.316465	6.01283	0.201424
Dendrobium_GLEAN_10038672	19.4376	41.8908	25.6323	38.3006	29.9002	23.203	14.2303	29.7058
Dendrobium_GLEAN_10100876	3.45914	3.05022	3.26298	3.34498	2.78123	2.77601	2.26046	2.42946
Dendrobium_GLEAN_10015149	0.045982	0	0	0	0	0.247238	0.191736	0
Dendrobium_GLEAN_10124976	3.9805	4.99197	5.93448	2.25669	3.30907	1.92074	1.75554	6.41821
Dendrobium_GLEAN_10127400	0	0	0.055313	0.202511	0	0	0.478982	1.2355
Dendrobium_GLEAN_10123732	48.5072	50.863	47.1295	50.4986	50.092	74.4024	95.8863	112.705
Dendrobium_GLEAN_10059009	0	0	0	0	0	0	0	0
Dendrobium_GLEAN_10055866	9.32827	12.6377	6.69097	11.0207	2.93574	2.48793	3.12565	4.56054
Dendrobium_GLEAN_10142076	0	0	0	0.0986872	0	0	0	0
Dendrobium_GLEAN_10043733	0.381363	1.07113	0.257092	0.627506	0.190221	0.615159	0.874612	2.18608
Dendrobium_GLEAN_10023109	3.72883	2.76169	3.6967	2.93242	3.93863	3.73468	6.4023	3.9409
Dendrobium_GLEAN_10085379	5.47979	11.7939	4.7032	9.80974	5.56778	5.72911	4.01983	5.0356
Dendrobium_GLEAN_10008091	3.49645	0.931254	1.17855	1.70797	0.697602	0.783329	0.637853	0.97222
Dendrobium_GLEAN_10104568	101.652	137.513	83.2401	62.723	84.681	51.2851	132.493	237.389
Dendrobium_GLEAN_10042720	0	0	0.0483091	0	0.0285949	0	0	0
Dendrobium_GLEAN_10101074	0.558327	0.878718	0.882167	1.79431	0.765845	0.813052	0	2.68698
Dendrobium_GLEAN_10017878	0.140136	0.135724	0	0.288229	0	0	0	0
Dendrobium_GLEAN_10055262	20.2062	14.1506	17.394	16.8797	20.8396	20.1691	21.9713	14.9472
Dendrobium_GLEAN_10095003	4.02275	4.78834	4.29556	5.08437	5.45282	3.79758	8.70713	5.49099
Dendrobium_GLEAN_10017902	13.292	10.0551	24.7214	14.4782	31.9335	22.3781	29.1882	17.8321
Dendrobium_GLEAN_10029108	38.1926	29.9167	35.2974	35.2566	36.4718	52.5902	25.1244	27.6774
Dendrobium_GLEAN_10050459	4.76461	8.5506	14.643	14.0512	16.0767	5.46279	10.372	18.4639
Dendrobium_GLEAN_10058072	30.6761	29.868	28.7299	35.9822	31.1703	39.8133	35.0319	28.5428
Novel02059	1.11316	0.594825	2.8788	1.22372	3.36972	1.13515	0.360129	1.57636
Dendrobium_GLEAN_10081006	47.9051	49.1389	48.4673	41.7568	49.3502	47.0024	38.1335	32.3171
Novel03588	0.445244	0.566755	0.493115	0.614876	0.304573	0.786602	0.119351	0.130606
Dendrobium_GLEAN_10098521	6.42076	13.681	12.9404	15.6273	7.20591	5.32237	5.13154	6.22583
Dendrobium_GLEAN_10070518	0.39238	0.760054	1.04706	1.31144	1.50049	0.849767	2.45421	1.98626
Dendrobium_GLEAN_10010985	87.2117	52.4013	56.7019	47.4819	74.8614	86.1726	154.528	150.149
Dendrobium_GLEAN_10014835	0.085714	0	0	0	0	0	0.178705	0.146668
Dendrobium_GLEAN_10039104	99.1305	21.4011	74.1676	44.7165	132.768	131.931	380.215	73.1853
Dendrobium_GLEAN_10136471	11.1583	3.08772	3.87479	5.04401	3.60851	17.4166	18.2149	12.5365
Dendrobium_GLEAN_10106053	3.37788	4.01507	4.1403	4.26329	7.81162	3.02706	0.800287	5.3859
Dendrobium_GLEAN_10046044	1.71428	4.48284	1.7335	2.99703	2.05217	0.921743	3.39539	1.76002
Novel01739	0	0	0.0713631	0.0435454	0.126723	0.113836	0.0441406	0.54341
Dendrobium_GLEAN_10051549	0	0.160575	1.18754	0.0852509	0.661575	0	0.172832	0.283696
Dendrobium_GLEAN_10084702	16.4309	18.5263	17.979	17.6541	20.3055	9.23023	23.7752	15.1068
Dendrobium_GLEAN_10077782	0	0	0	0	0	0	0	0
Dendrobium_GLEAN_10072828	72.8107	73.9771	70.0493	73.0419	71.3814	71.1157	72.3856	74.3458
Dendrobium_GLEAN_10138903	4.35638	8.67676	4.20765	6.48941	2.88761	3.7872	4.37534	3.90053
Dendrobium_GLEAN_10068205	54.0265	112.759	48.7872	117.198	48.7029	54.026	103.693	114.234
Dendrobium_GLEAN_10014226	0	0	0	0	0	0	0	0
Dendrobium_GLEAN_10053484	10.3387	6.18794	12.9214	6.80942	20.7433	12.492	19.4965	18.2872
Dendrobium_GLEAN_10069847	0	0	0.15942	0.0648516	0	0.113023	0.131476	0
Dendrobium_GLEAN_10013676	0.593969	0.496824	0.932795	0.69413	0.700268	2.2259	1.88569	0.808468
Novel03579	0.778989	40.9297	31.1807	50.4698	31.2786	0.349042	7.30851	21.6605
Dendrobium_GLEAN_10125718	3.27113	8.00555	1.06703	3.36402	1.85969	0.315204	0.879997	3.52091
Dendrobium_GLEAN_10026977	0	0.542895	1.25962	0.288229	0.931981	0	11.005	0.719371
Dendrobium_GLEAN_10040941	45.2331	44.7629	46.9495	61.2757	40.5623	46.5872	26.1066	42.8528
Novel02150	0	0	0	0	0	0	0	0
Dendrobium_GLEAN_10005803	0	0	0.086507	0	0.204819	0	0.428061	0
Dendrobium_GLEAN_10006778	0	0	0	0	0	0	0	0
Dendrobium_GLEAN_10001277	4.54804	8.80971	1.69082	12.1056	2.13508	2.03784	0.139444	0.228891
Dendrobium_GLEAN_10100634	0.633844	1.31548	1.44977	1.3968	0.993635	1.05488	0.66075	0.697237
Dendrobium_GLEAN_10073535	4.38988	3.59031	2.21955	3.91259	3.11416	4.45848	4.06776	4.507
Dendrobium_GLEAN_10050669	8.33003	9.99907	5.44758	7.21046	6.8661	9.33831	7.9125	4.32016
Dendrobium_GLEAN_10027272	4.76331	3.10208	2.76823	4.13844	2.90843	6.3293	9.75979	10.3288
Dendrobium_GLEAN_10112424	4.35669	41.0429	13.5045	24.356	15.4318	18.0247	2.06074	32.0691
Dendrobium_GLEAN_10072995	5.45584	5.9566	3.09287	4.89666	3.16664	3.91136	2.17157	4.92244
Dendrobium_GLEAN_10048749	0.131117	0	0.110489	0	0	0	0	0.112179
Dendrobium_GLEAN_10013815	33.1141	42.4525	68.2637	57.3761	37.6488	19.6653	8.64464	29.5379
Novel00533	3.43671	0	4.26423	0.0139145	4.96714	3.45565	0	0
Novel05305	3.09321	10.3152	1.74759	9.43468	1.7182	2.80346	1.6489	8.63103
Dendrobium_GLEAN_10100215	10.7863	18.505	21.1133	16.8808	29.3887	13.6809	10.263	15.4933
Dendrobium_GLEAN_10046085	0	0	0	0	0	0	0	0
Dendrobium_GLEAN_10099089	0	0.0822173	0	0	0	0	0	0
Dendrobium_GLEAN_10136532	20.8724	28.977	34.1671	28.1904	42.0246	29.986	29.5415	20.0025
Dendrobium_GLEAN_10117239	9.68003	3.81956	0	2.67307	0	12.4498	29.5253	7.05495
Dendrobium_GLEAN_10055014	0	0	0.148052	0.0903406	0	0.157445	0	0.150316
Dendrobium_GLEAN_10020870	23.0024	9.12347	16.1345	17.4826	25.7879	44.8391	31.378	17.0936
Dendrobium_GLEAN_10067755	63.0147	38.4908	76.5802	33.5959	76.4909	64.7447	5.46007	29.151
Dendrobium_GLEAN_10126164	745.835	737.404	485.856	337.747	371.782	349.166	765.715	1715.53
Novel00643	0.119037	0	2.40742	0.36725	1.89999	0.426694	0.620448	0
Dendrobium_GLEAN_10090739	1.74889	3.87627	2.43736	4.28885	3.01962	3.888	7.2224	4.94928
Dendrobium_GLEAN_10055807	0	0	0	0	0	0	0	0
Dendrobium_GLEAN_10114045	0	0	0	0	0	0	0	0
Dendrobium_GLEAN_10059278	4.15461	0	7.00198	0.133518	7.77108	5.11929	5.27837	0
PEQU_38271-D9	0	0	0	0	0	0	0	0
Dendrobium_GLEAN_10095785	2.2754	4.76013	3.52806	4.49281	3.54105	3.7519	0.189759	0.389351
Dendrobium_GLEAN_10041552	30.5381	36.0948	43.479	29.9912	25.8441	10.765	5.5069	33.3712
Dendrobium_GLEAN_10111917	52.1057	59.5189	53.6819	68.1832	60.269	75.5483	44.5729	36.8784
Dendrobium_GLEAN_10137731	4.06335	7.15532	4.91823	4.93849	5.04849	6.5544	3.50419	5.56234
Dendrobium_GLEAN_10069256	0.724393	1.92937	0.0763036	0.558722	0.0903305	0.568014	0.377572	0.619766
Novel00958	10.174	12.4243	18.8242	11.8276	14.7829	14.9644	10.7212	8.70455
Dendrobium_GLEAN_10115873	0.572662	1.81797	1.63537	3.01005	1.87253	1.28297	2.52055	1.46985
Dendrobium_GLEAN_10011868	0	0	0	0	0	0	0	0
Dendrobium_GLEAN_10117426	29.699	24.2686	57.4108	42.8259	67.5436	52.8799	50.1783	66.2866
Dendrobium_GLEAN_10035989	0	0	0	0	0	0	0	0
Dendrobium_GLEAN_10026209	0.431187	7.37085	5.92262	7.18356	5.72093	0.753488	7.14689	6.27144
Dendrobium_GLEAN_10021773	0.0412549	0	0	0.0424263	0.0823105	0	0	0.0352963
Dendrobium_GLEAN_10037020	838.762	750.89	84.939	782.889	78.0068	844.238	1999.8	3064.26
Novel04956	2.58396	3.81978	4.46949	3.35663	5.01978	2.86403	3.40251	6.80679
Dendrobium_GLEAN_10006550	58.7053	55.9462	53.2021	62.213	54.6593	52.8801	33.018	64.0611
Novel05016	0.243211	0.282665	0.327916	0	0.242623	0.653853	0.456362	0.249699
[truncated: 14,384 more rows]
