# Supplementary material for: Identification and analysis of sucrose synthase gene family associated with polysaccharide biosynthesis in Dendrobium catenatum by transcriptomic analysis
Source: PeerJ. 2022 Apr 5;10:e13222. doi: 10.7717/peerj.13222 (PMC8992646; doi:10.7717/peerj.13222)
Supplement: Table S6 [file peerj-10-13222-s011.xlsx]

## Sheet: S1 vs S2
Gene_id	readcount_S1	readcount_S2	log2FoldChange	pval	padj	Blast swiss prot
Dendrobium_GLEAN_10001385	183.96	1766	-3.263	3.1918e-11	5.6704e-07	sp|Q05736|PR1_ASPOF Pathogenesis-related protein 1 OS=Asparagus officinalis GN=PR1 PE=2 SV=1//8.60266e-49
Dendrobium_GLEAN_10008932	12.769	206.975	-4.0187	2.7173e-06	0.009655	sp|Q05736|PR1_ASPOF Pathogenesis-related protein 1 OS=Asparagus officinalis GN=PR1 PE=2 SV=1//3.19265e-50
Dendrobium_GLEAN_10021060	742.637	67.081	3.4687	7.1563e-09	4.0065e-05	sp|Q8GSN8|3MAT_DAHPI Malonyl-coenzyme A:anthocyanin 3-O-glucoside-6&apos;&apos;-O-malonyltransferase OS=Dahlia pinnata GN=3MAT PE=1 SV=1//6.80696e-75
Dendrobium_GLEAN_10038235	181.031	1001.34	-2.4676	1.1644e-06	0.004597	sp|Q9C523|DIR19_ARATH Dirigent protein 19 OS=Arabidopsis thaliana GN=DIR19 PE=2 SV=1//3.26174e-50
Dendrobium_GLEAN_10040217	258.87	1253.64	-2.2758	3.7049e-06	0.010823	sp|Q6GME1|PYRG2_XENLA CTP synthase 2 OS=Xenopus laevis GN=ctps2 PE=2 SV=1//1.00214e-25
Dendrobium_GLEAN_10043120	2648.3	630.931	2.0695	7.9437e-06	0.018816	sp|Q9ZPX9|KIC_ARATH Calcium-binding protein KIC OS=Arabidopsis thaliana GN=KIC PE=1 SV=2//3.55371e-38
Dendrobium_GLEAN_10044155	617.09	107.817	2.5169	1.3251e-05	0.026157	sp|Q9SZ06|EF109_ARATH Ethylene-responsive transcription factor ERF109 OS=Arabidopsis thaliana GN=ERF109 PE=1 SV=1//3.26708e-27
Dendrobium_GLEAN_10049299	1607.7	279.987	2.5216	8.6323e-08	0.00038339	sp|P24465|C71A1_PERAE Cytochrome P450 71A1 OS=Persea americana GN=CYP71A1 PE=1 SV=2//1.2789e-124
Dendrobium_GLEAN_10054606	386.38	4.91989	6.2952	2.1006e-14	7.4637e-10	sp|Q38910|XTH23_ARATH Probable xyloglucan endotransglucosylase/hydrolase protein 23 OS=Arabidopsis thaliana GN=XTH23 PE=2 SV=1//7.37123e-136
Dendrobium_GLEAN_10061242	0	83.5092	#NAME?	3.4649e-06	0.010823	sp|B9DHQ0|TBA5_ARATH Tubulin alpha-5 chain OS=Arabidopsis thaliana GN=TUBA5 PE=1 SV=2//4.43845e-56
Dendrobium_GLEAN_10062568	27.0663	262.05	-3.2753	1.1935e-05	0.024945	sp|A7NY33|PER4_VITVI Peroxidase 4 OS=Vitis vinifera GN=GSVIVT00023967001 PE=1 SV=1//5.41098e-135
Dendrobium_GLEAN_10065001	345.744	2219.44	-2.6824	7.8933e-09	4.0065e-05	sp|Q96376|LIS_CLABR S-linalool synthase OS=Clarkia breweri GN=LIS PE=2 SV=1//1.71946e-123
Dendrobium_GLEAN_10086266	1388.41	309.006	2.1677	4.2646e-06	0.010823	sp|Q8H4H5|NRAM5_ORYSJ Metal transporter Nramp5 OS=Oryza sativa subsp. japonica GN=NRAMP5 PE=2 SV=1//0
Dendrobium_GLEAN_10088405	5541.98	808.462	2.7771	5.6429e-10	5.5821e-06	sp|P14133|ASO_CUCSA L-ascorbate oxidase OS=Cucumis sativus PE=1 SV=1//0
Dendrobium_GLEAN_10088783	284.703	3031.49	-3.4125	7.8552e-10	5.5821e-06	-//-
Dendrobium_GLEAN_10092450	10.3257	175.583	-4.0878	1.1153e-05	0.024767	-//-
Dendrobium_GLEAN_10094495	742.159	2699.91	-1.8631	2.6969e-05	0.04563	sp|F4HVY0|CER1_ARATH Protein ECERIFERUM 1 OS=Arabidopsis thaliana GN=CER1 PE=1 SV=1//2.11505e-35
Dendrobium_GLEAN_10106086	697.927	130.928	2.4143	3.9955e-06	0.010823	sp|Q69RG7|4CLL7_ORYSJ 4-coumarate--CoA ligase-like 7 OS=Oryza sativa subsp. japonica GN=4CLL7 PE=2 SV=1//1.22567e-40
Dendrobium_GLEAN_10106476	3834.9	714.324	2.4245	1.9274e-05	0.034241	sp|Q7XLR1|PIP26_ORYSJ Probable aquaporin PIP2-6 OS=Oryza sativa subsp. japonica GN=PIP2-6 PE=2 SV=2//3.0066e-168
Dendrobium_GLEAN_10115751	11450.2	1890.14	2.5988	7.7821e-10	5.5821e-06	sp|P83948|PME3_CITSI Pectinesterase 3 OS=Citrus sinensis PE=1 SV=1//0
Os08t0240500-00-D6	441.8	67.7187	2.7058	1.8936e-05	0.034241	sp|Q38907|XTH25_ARATH Probable xyloglucan endotransglucosylase/hydrolase protein 25 OS=Arabidopsis thaliana GN=XTH25 PE=2 SV=2//1.17163e-71

## Sheet: S1 vs S3
Gene_id	readcount_S1	readcount_S3	log2FoldChange	pval	padj	Blast swiss prot
Dendrobium_GLEAN_10000429	1125.18	4.39995	7.9985	0.00010215	0.0093692	sp|Q9LQC9|CSLA3_ARATH Probable mannan synthase 3 OS=Arabidopsis thaliana GN=CSLA3 PE=2 SV=1//3.03136e-23
Dendrobium_GLEAN_10000655	106.36	2.47444	5.4257	3.1174e-05	0.0035305	sp|O64538|SAU40_ARATH Auxin-responsive protein SAUR40 OS=Arabidopsis thaliana GN=SAUR40 PE=2 SV=1//1.42378e-15
Dendrobium_GLEAN_10000739	635.775	1.42161	8.8048	0.00012202	0.010773	sp|Q9STM6|GDL57_ARATH GDSL esterase/lipase At3g48460 OS=Arabidopsis thaliana GN=At3g48460 PE=2 SV=1//4.56244e-64
Dendrobium_GLEAN_10000852	14600.7	379.22	5.2669	0.00011068	0.0099706	sp|O59952|LIP_THELA Lipase OS=Thermomyces lanuginosus GN=LIP PE=1 SV=1//4.88934e-07
Dendrobium_GLEAN_10000879	1532.6	14882.3	-3.2795	6.4332e-09	2.6796e-06	sp|Q9FMK7|BT1_ARATH BTB/POZ and TAZ domain-containing protein 1 OS=Arabidopsis thaliana GN=BT1 PE=1 SV=1//1.64971e-23
Dendrobium_GLEAN_10001091	1668.52	489.606	1.7689	0.000118	0.010524	-//-
Dendrobium_GLEAN_10001831	238.457	14.4498	4.0446	6.1071e-07	0.00012948	sp|Q00874|DR100_ARATH DNA-damage-repair/toleration protein DRT100 OS=Arabidopsis thaliana GN=DRT100 PE=2 SV=2//8.12516e-08
Dendrobium_GLEAN_10002952	289.969	12.2371	4.5666	4.1062e-08	1.3979e-05	sp|Q9C9X7|IDD14_ARATH Protein indeterminate-domain 14 OS=Arabidopsis thaliana GN=IDD14 PE=1 SV=1//1.7154e-130
Dendrobium_GLEAN_10003066	12607.5	38.879	8.3411	5.008e-48	1.7731e-43	sp|Q8LB81|GDL79_ARATH GDSL esterase/lipase At5g33370 OS=Arabidopsis thaliana GN=At5g33370 PE=2 SV=1//0
Dendrobium_GLEAN_10003152	256.168	46.2038	2.471	0.00040502	0.027736	-//-
Dendrobium_GLEAN_10003359	165.657	13.8389	3.5814	5.4844e-05	0.005612	sp|A7PZL3|PGLR_VITVI Probable polygalacturonase OS=Vitis vinifera GN=GSVIVT00026920001 PE=1 SV=1//1.76709e-13
Dendrobium_GLEAN_10003366	919.133	251.53	1.8695	0.0001596	0.013384	-//-
Dendrobium_GLEAN_10003899	1674.43	5296.34	-1.6613	0.00063146	0.040575	-//-
Dendrobium_GLEAN_10005633	1604.59	103.474	3.9549	1.2146e-06	0.00022633	sp|Q2QS14|UGDH4_ORYSJ UDP-glucose 6-dehydrogenase 4 OS=Oryza sativa subsp. japonica GN=UGD4 PE=2 SV=1//0
Dendrobium_GLEAN_10005657	769.973	101.162	2.9281	9.2373e-05	0.0085839	-//-
Dendrobium_GLEAN_10005921	364.067	84.5958	2.1055	0.00073897	0.044647	sp|C0LGW6|ERL1_ARATH LRR receptor-like serine/threonine-protein kinase ERL1 OS=Arabidopsis thaliana GN=ERL1 PE=1 SV=1//4.63296e-10
Dendrobium_GLEAN_10005947	5068.74	1093.66	2.2125	3.5125e-07	8.2292e-05	sp|Q9LS40|ASPG1_ARATH Protein ASPARTIC PROTEASE IN GUARD CELL 1 OS=Arabidopsis thaliana GN=ASPG1 PE=1 SV=1//2.35233e-168
Dendrobium_GLEAN_10007009	175.153	19.2101	3.1887	0.00015141	0.012794	sp|Q9LX14|UFC_ARATH Protein UPSTREAM OF FLC OS=Arabidopsis thaliana GN=UFC PE=2 SV=1//7.61315e-07
Dendrobium_GLEAN_10007700	174.759	5.36271	5.0263	0.00023471	0.017794	-//-
Dendrobium_GLEAN_10007715	222.2	1.92551	6.8505	3.0802e-11	2.0972e-08	sp|Q09023|CHI2_BRANA Endochitinase CH25 OS=Brassica napus PE=2 SV=1//4.75536e-105
Dendrobium_GLEAN_10007825	333.143	69.8418	2.254	0.00029555	0.021487	sp|Q9FL28|FLS2_ARATH LRR receptor-like serine/threonine-protein kinase FLS2 OS=Arabidopsis thaliana GN=FLS2 PE=1 SV=1//7.4789e-06
Dendrobium_GLEAN_10008843	875.671	152.31	2.5234	6.207e-06	0.00091565	sp|Q9SU13|FLA2_ARATH Fasciclin-like arabinogalactan protein 2 OS=Arabidopsis thaliana GN=FLA2 PE=1 SV=1//1.5326e-44
Dendrobium_GLEAN_10009058	367.387	71.8183	2.3549	0.00017913	0.014513	-//-
Dendrobium_GLEAN_10009352	867.81	128.719	2.7531	4.4204e-05	0.0046998	-//-
Dendrobium_GLEAN_10009533	402.487	40.841	3.3009	2.9842e-07	7.3373e-05	-//-
Dendrobium_GLEAN_10010464	1171.98	343.144	1.7721	0.00020332	0.015961	sp|Q9LZW3|PUB16_ARATH U-box domain-containing protein 16 OS=Arabidopsis thaliana GN=PUB16 PE=2 SV=1//1.31365e-173
Dendrobium_GLEAN_10010677	287.053	46.2573	2.6336	0.0001084	0.0098408	sp|P49730|RIR2_TOBAC Ribonucleoside-diphosphate reductase small chain OS=Nicotiana tabacum PE=2 SV=1//0
Dendrobium_GLEAN_10010781	394.111	25.8057	3.9328	0.0005497	0.036031	sp|Q9XF59|PIP12_MAIZE Aquaporin PIP1-2 OS=Zea mays GN=PIP1-2 PE=1 SV=1//1.00076e-58
Dendrobium_GLEAN_10010784	9.42782	147.482	-3.9675	3.527e-05	0.0038991	sp|Q10717|CYSP2_MAIZE Cysteine proteinase 2 OS=Zea mays GN=CCP2 PE=2 SV=1//1.96172e-179
Dendrobium_GLEAN_10011171	620.539	46.0686	3.7517	3.5562e-07	8.2292e-05	sp|F4HZB5|NET1D_ARATH Protein NETWORKED 1D OS=Arabidopsis thaliana GN=NET1D PE=3 SV=1//1.11924e-07
Dendrobium_GLEAN_10011247	132.136	0.503896	8.0347	9.6896e-08	2.886e-05	sp|Q9SK27|ENL1_ARATH Early nodulin-like protein 1 OS=Arabidopsis thaliana GN=At2g25060 PE=1 SV=2//6.90695e-44
Dendrobium_GLEAN_10011557	154.301	9.99634	3.9482	9.132e-05	0.0085084	-//-
Dendrobium_GLEAN_10011586	290.337	63.1561	2.2007	0.00066613	0.04204	-//-
Dendrobium_GLEAN_10012098	4509.66	614.308	2.876	1.7826e-10	1.018e-07	sp|Q9LS40|ASPG1_ARATH Protein ASPARTIC PROTEASE IN GUARD CELL 1 OS=Arabidopsis thaliana GN=ASPG1 PE=1 SV=1//5.08497e-108
Dendrobium_GLEAN_10012148	457.797	8.25097	5.794	0.00021153	0.016424	sp|O64495|SBT12_ARATH Subtilisin-like protease SBT1.2 OS=Arabidopsis thaliana GN=SBT1.2 PE=2 SV=1//0
Dendrobium_GLEAN_10012258	2202.22	404.557	2.4445	0.00072243	0.044136	sp|Q42798|C93A1_SOYBN 3,9-dihydroxypterocarpan 6A-monooxygenase OS=Glycine max GN=CYP93A1 PE=1 SV=1//5.74055e-138
Dendrobium_GLEAN_10012363	757.385	83.1318	3.1876	7.3648e-09	2.9971e-06	sp|Q9FJ90|ERF25_ARATH Ethylene-responsive transcription factor ERF025 OS=Arabidopsis thaliana GN=ERF025 PE=2 SV=1//3.91864e-21
Dendrobium_GLEAN_10012438	280.736	32.2298	3.1227	1.2323e-05	0.001634	sp|Q40746|NIP11_ORYSJ Aquaporin NIP1-1 OS=Oryza sativa subsp. japonica GN=NIP1-1 PE=2 SV=1//1.72218e-110
Dendrobium_GLEAN_10012506	1725.73	81.4739	4.4047	2.002e-08	7.2328e-06	-//-
Dendrobium_GLEAN_10012601	124.638	5.18256	4.5879	2.5939e-05	0.0030111	sp|Q9FVQ0|YUC10_ARATH Probable indole-3-pyruvate monooxygenase YUCCA10 OS=Arabidopsis thaliana GN=YUC10 PE=2 SV=1//1.40177e-45
Dendrobium_GLEAN_10014574	841.058	239.391	1.8128	0.00029135	0.021378	sp|O48788|Y2267_ARATH Probable inactive receptor kinase At2g26730 OS=Arabidopsis thaliana GN=At2g26730 PE=1 SV=1//2.73614e-77
Dendrobium_GLEAN_10015536	770.139	68.4007	3.493	1.9705e-06	0.00034882	sp|Q93Y09|SCP45_ARATH Serine carboxypeptidase-like 45 OS=Arabidopsis thaliana GN=SCPL45 PE=2 SV=1//1.73234e-06
Dendrobium_GLEAN_10015771	228.711	27.0192	3.0815	7.066e-05	0.0068917	-//-
Dendrobium_GLEAN_10016018	1916.12	645.699	1.5693	0.0004201	0.028548	sp|Q9SNC3|FLA4_ARATH Fasciclin-like arabinogalactan protein 4 OS=Arabidopsis thaliana GN=FLA4 PE=1 SV=1//1.15293e-114
Dendrobium_GLEAN_10016474	821.585	136.829	2.586	1.1982e-06	0.00022446	sp|Q9C7F8|AB13B_ARATH ABC transporter B family member 13 OS=Arabidopsis thaliana GN=ABCB13 PE=3 SV=1//5.70559e-106
Dendrobium_GLEAN_10016598	227.95	13.9289	4.0326	7.1049e-07	0.0001454	sp|I1S2N3|GAOA_GIBZE Galactose oxidase OS=Gibberella zeae (strain PH-1 / ATCC MYA-4620 / FGSC 9075 / NRRL 31084) GN=GAOA PE=3 SV=1//4.71931e-11
Dendrobium_GLEAN_10016803	0.538351	73.0343	-7.0839	4.4042e-05	0.0046967	-//-
Dendrobium_GLEAN_10017155	97.05	5.27264	4.2021	0.0003329	0.023572	-//-
Dendrobium_GLEAN_10017459	1676.02	519.176	1.6907	0.00019991	0.01578	-//-
Dendrobium_GLEAN_10017644	1389.78	354.071	1.9727	2.9061e-05	0.0033084	sp|Q0WSY2|FPP4_ARATH Filament-like plant protein 4 OS=Arabidopsis thaliana GN=FPP4 PE=1 SV=1//0
Dendrobium_GLEAN_10017815	4020.74	114.534	5.1336	6.015e-24	1.936e-20	sp|Q9LMM1|C86A4_ARATH Cytochrome P450 86A4 OS=Arabidopsis thaliana GN=CYP86A4 PE=1 SV=1//1.35197e-111
Dendrobium_GLEAN_10018852	1425.68	415.691	1.7781	0.00064876	0.041461	sp|Q7XV13|LOX5_ORYSJ Putative lipoxygenase 5 OS=Oryza sativa subsp. japonica GN=Os04g0447100 PE=3 SV=2//2.16338e-35
Dendrobium_GLEAN_10019196	2599.02	680.353	1.9336	1.6727e-05	0.0021075	-//-
Dendrobium_GLEAN_10019497	189.269	5.2276	5.1781	0.00019869	0.015737	sp|Q5JMF2|ABIL5_ORYSJ Probable protein ABIL5 OS=Oryza sativa subsp. japonica GN=Os01g0760900 PE=2 SV=1//5.50287e-08
Dendrobium_GLEAN_10019829	599.314	2940.82	-2.2948	3.1828e-07	7.6141e-05	-//-
Dendrobium_GLEAN_10020390	3429.26	677.288	2.3401	0.00083884	0.04909	sp|Q9LHF1|LRX4_ARATH Leucine-rich repeat extensin-like protein 4 OS=Arabidopsis thaliana GN=LRX4 PE=2 SV=1//0
Dendrobium_GLEAN_10020559	1822.03	5921.37	-1.7004	5.5181e-05	0.0056302	sp|Q5Z9S8|AB42G_ORYSJ ABC transporter G family member 42 OS=Oryza sativa subsp. japonica GN=ABCG42 PE=2 SV=1//5.20127e-31
Dendrobium_GLEAN_10020698	1206.63	122.495	3.3002	1.6028e-10	9.4577e-08	sp|Q93Y09|SCP45_ARATH Serine carboxypeptidase-like 45 OS=Arabidopsis thaliana GN=SCPL45 PE=2 SV=1//0
Dendrobium_GLEAN_10020962	818.251	104.374	2.9708	3.1212e-05	0.0035305	sp|O64640|CXE8_ARATH Probable carboxylesterase 8 OS=Arabidopsis thaliana GN=CXE8 PE=2 SV=1//7.12265e-34
Dendrobium_GLEAN_10021060	731.58	10.2751	6.1538	3.1481e-19	6.1921e-16	sp|Q8GSN8|3MAT_DAHPI Malonyl-coenzyme A:anthocyanin 3-O-glucoside-6&apos;&apos;-O-malonyltransferase OS=Dahlia pinnata GN=3MAT PE=1 SV=1//6.80696e-75
Dendrobium_GLEAN_10021100	155.667	2.84323	5.7748	0.00011451	0.01025	sp|Q944R1|PLY15_ARATH Probable pectate lyase 15 OS=Arabidopsis thaliana GN=At4g13710 PE=2 SV=1//1.04018e-135
Dendrobium_GLEAN_10021215	2332.44	372.411	2.6469	1.2164e-08	4.6813e-06	sp|Q8L9T5|ATL2_ARATH RING-H2 finger protein ATL2 OS=Arabidopsis thaliana GN=ATL2 PE=2 SV=2//6.67953e-30
Dendrobium_GLEAN_10021414	2308.62	704.703	1.7119	0.00011221	0.010084	sp|Q9ZPY8|AIB_ARATH Transcription factor ABA-INDUCIBLE bHLH-TYPE OS=Arabidopsis thaliana GN=AIB PE=2 SV=2//8.49141e-122
Dendrobium_GLEAN_10021442	5551.85	576.603	3.2673	2.7815e-06	0.00048273	sp|P43298|TMK1_ARATH Receptor protein kinase TMK1 OS=Arabidopsis thaliana GN=TMK1 PE=1 SV=1//0
Dendrobium_GLEAN_10021574	1195.71	159.215	2.9088	5.8608e-05	0.0059456	sp|Q0WSY2|FPP4_ARATH Filament-like plant protein 4 OS=Arabidopsis thaliana GN=FPP4 PE=1 SV=1//0
Dendrobium_GLEAN_10021675	188.058	4.26484	5.4625	5.9013e-06	0.00087421	sp|P00434|PERP7_BRARR Peroxidase P7 OS=Brassica rapa subsp. rapa PE=1 SV=3//6.24518e-136
Dendrobium_GLEAN_10021993	1291.35	137.322	3.2332	2.7702e-10	1.5325e-07	sp|Q9M8J2|GATL4_ARATH Probable galacturonosyltransferase-like 4 OS=Arabidopsis thaliana GN=GATL4 PE=2 SV=1//1.50079e-147
Dendrobium_GLEAN_10021994	512.758	81.9413	2.6456	6.5214e-06	0.00095075	sp|O22775|XXT2_ARATH Xyloglucan 6-xylosyltransferase 2 OS=Arabidopsis thaliana GN=XXT2 PE=1 SV=1//0
Dendrobium_GLEAN_10021995	508.293	84.5058	2.5885	9.6356e-06	0.0013274	sp|O22775|XXT2_ARATH Xyloglucan 6-xylosyltransferase 2 OS=Arabidopsis thaliana GN=XXT2 PE=1 SV=1//0
Dendrobium_GLEAN_10022026	182.886	8.6648	4.3996	1.4147e-06	0.00025819	sp|Q8LNZ5|XTHB_PHAAN Probable xyloglucan endotransglucosylase/hydrolase protein B OS=Phaseolus angularis GN=XTHB PE=2 SV=1//1.31054e-87
Dendrobium_GLEAN_10022032	119.556	3.39216	5.1393	8.4538e-06	0.0011988	sp|P46690|GASA4_ARATH Gibberellin-regulated protein 4 OS=Arabidopsis thaliana GN=GASA4 PE=1 SV=2//3.0241e-28
Dendrobium_GLEAN_10022055	3317.96	698.037	2.2489	3.8101e-07	8.6471e-05	sp|Q9SUC9|UGPI7_ARATH Uncharacterized GPI-anchored protein At4g28100 OS=Arabidopsis thaliana GN=At4g28100 PE=1 SV=1//2.51131e-35
Dendrobium_GLEAN_10022088	286.332	29.1163	3.2978	0.00060852	0.039387	sp|Q6YUX0|ILI5_ORYSJ Transcription factor ILI5 OS=Oryza sativa subsp. japonica GN=ILI5 PE=1 SV=1//1.33329e-22
Dendrobium_GLEAN_10022297	1968.04	172.091	3.5155	5.135e-05	0.005316	-//-
Dendrobium_GLEAN_10022578	14.9163	151.654	-3.3458	0.00017079	0.013965	sp|Q8S340|PPA22_ARATH Purple acid phosphatase 22 OS=Arabidopsis thaliana GN=PAP22 PE=2 SV=1//4.39618e-163
Dendrobium_GLEAN_10022656	1031.43	17.3296	5.8953	5.4596e-12	4.3e-09	sp|Q9LU14|APG2_ARATH GDSL esterase/lipase APG OS=Arabidopsis thaliana GN=APG PE=1 SV=1//3.18953e-51
Dendrobium_GLEAN_10022657	1805.21	23.1512	6.2849	3.9169e-06	0.00061361	sp|Q9LU14|APG2_ARATH GDSL esterase/lipase APG OS=Arabidopsis thaliana GN=APG PE=1 SV=1//4.59159e-112
Dendrobium_GLEAN_10022740	137.191	16.7271	3.0359	0.00079947	0.047413	sp|O49545|BAME1_ARATH Leucine-rich repeat receptor-like serine/threonine-protein kinase BAM1 OS=Arabidopsis thaliana GN=BAM1 PE=1 SV=1//4.71194e-130
Dendrobium_GLEAN_10023445	623.425	73.4116	3.0861	8.6957e-08	2.6931e-05	sp|O22784|CRR11_ARATH Cysteine-rich repeat secretory protein 11 OS=Arabidopsis thaliana GN=CRRSP11 PE=1 SV=2//1.25115e-45
Dendrobium_GLEAN_10023662	686.227	110.016	2.641	1.4433e-06	0.00026136	sp|Q9SRT2|BH062_ARATH Transcription factor bHLH62 OS=Arabidopsis thaliana GN=BHLH62 PE=2 SV=1//3.61074e-74
Dendrobium_GLEAN_10023953	2022.95	406.601	2.3148	3.3385e-05	0.003717	sp|Q8H1D6|RBK1_ARATH Receptor-like cytosolic serine/threonine-protein kinase RBK1 OS=Arabidopsis thaliana GN=RBK1 PE=1 SV=1//1.26638e-76
Dendrobium_GLEAN_10024559	776.737	2502.32	-1.6878	0.0001194	0.010595	sp|Q8VZ80|PLT5_ARATH Polyol transporter 5 OS=Arabidopsis thaliana GN=PLT5 PE=1 SV=2//1.78076e-140
Dendrobium_GLEAN_10024962	955.465	133.694	2.8373	6.8985e-08	2.2004e-05	sp|O49545|BAME1_ARATH Leucine-rich repeat receptor-like serine/threonine-protein kinase BAM1 OS=Arabidopsis thaliana GN=BAM1 PE=1 SV=1//0
Dendrobium_GLEAN_10024984	3191.35	517.767	2.6238	7.2781e-05	0.0070598	sp|Q9ZPE7|EXO_ARATH Protein EXORDIUM OS=Arabidopsis thaliana GN=EXO PE=2 SV=1//3.6232e-93
Dendrobium_GLEAN_10025275	257.022	42.2261	2.6057	0.00022994	0.01747	sp|Q9FG33|LRKS5_ARATH Probable L-type lectin-domain containing receptor kinase S.5 OS=Arabidopsis thaliana GN=LECRKS5 PE=2 SV=1//5.91993e-121
Dendrobium_GLEAN_10025350	201.428	33.5698	2.585	0.00073459	0.044535	sp|Q40106|TBB2_LUPAL Tubulin beta-2 chain OS=Lupinus albus GN=TUBB2 PE=3 SV=1//1.09213e-145
Dendrobium_GLEAN_10025828	316.624	4.39995	6.1691	6.1638e-13	6.2352e-10	sp|O80622|EXP15_ARATH Expansin-A15 OS=Arabidopsis thaliana GN=EXPA15 PE=2 SV=2//1.51657e-115
Dendrobium_GLEAN_10025888	383.301	37.1251	3.368	3.0183e-07	7.351e-05	sp|Q8L7Q7|PME64_ARATH Probable pectinesterase/pectinesterase inhibitor 64 OS=Arabidopsis thaliana GN=PME64 PE=2 SV=2//2.51562e-23
Dendrobium_GLEAN_10025993	519.769	13.4335	5.274	3.479e-14	4.562e-11	sp|O22874|EXPA8_ARATH Expansin-A8 OS=Arabidopsis thaliana GN=EXPA8 PE=2 SV=1//4.95969e-127
Dendrobium_GLEAN_10026135	462.139	36.5762	3.6594	9.7194e-09	3.8235e-06	sp|O24585|CRI4_MAIZE Putative receptor protein kinase CRINKLY4 OS=Zea mays GN=CR4 PE=2 SV=1//0
Dendrobium_GLEAN_10026618	160.97	1193.97	-2.8909	5.4639e-05	0.0056072	-//-
Dendrobium_GLEAN_10026932	7958.8	2468.51	1.6889	6.0934e-05	0.0061289	sp|Q9XF43|KCS6_ARATH 3-ketoacyl-CoA synthase 6 OS=Arabidopsis thaliana GN=CUT1 PE=1 SV=1//0
Dendrobium_GLEAN_10027094	569.551	98.6234	2.5298	7.1217e-06	0.0010292	sp|Q9MAH1|TTL1_ARATH TPR repeat-containing thioredoxin TTL1 OS=Arabidopsis thaliana GN=TTL1 PE=1 SV=1//0
Dendrobium_GLEAN_10027426	283.64	57.0728	2.3132	0.00048042	0.032093	sp|Q8L7F9|B3GTF_ARATH Beta-1,3-galactosyltransferase 15 OS=Arabidopsis thaliana GN=B3GALT15 PE=2 SV=1//0
Dendrobium_GLEAN_10027448	76.8685	0.962755	6.3191	0.00064852	0.041461	sp|Q8GXL3|SPL8_ARATH Squamosa promoter-binding-like protein 8 OS=Arabidopsis thaliana GN=SPL8 PE=1 SV=2//1.71201e-43
Dendrobium_GLEAN_10028427	1019.32	246.837	2.046	3.3187e-05	0.0037082	sp|P49175|INV1_MAIZE Beta-fructofuranosidase 1 OS=Zea mays GN=IVR1 PE=3 SV=1//0
Dendrobium_GLEAN_10028489	471.649	23.8267	4.3071	4.9377e-05	0.0051267	-//-
Dendrobium_GLEAN_10028538	187.731	0.458859	8.6764	2.389e-11	1.6917e-08	sp|Q8LC95|ENL3_ARATH Early nodulin-like protein 3 OS=Arabidopsis thaliana GN=At5g25090 PE=1 SV=2//1.10375e-22
Dendrobium_GLEAN_10028652	341.034	26.6784	3.6762	1.2699e-07	3.5403e-05	sp|Q9SZ06|EF109_ARATH Ethylene-responsive transcription factor ERF109 OS=Arabidopsis thaliana GN=ERF109 PE=1 SV=1//8.48017e-28
Dendrobium_GLEAN_10028670	965.776	104.282	3.2112	3.6445e-06	0.00058651	sp|Q39131|LAML_ARATH Lamin-like protein OS=Arabidopsis thaliana GN=At5g15350 PE=1 SV=1//2.71605e-20
Dendrobium_GLEAN_10028744	5731.84	59.1954	6.5974	0.00029244	0.021392	sp|Q9FF86|DCR_ARATH BAHD acyltransferase DCR OS=Arabidopsis thaliana GN=DCR PE=2 SV=1//1.62042e-89
Dendrobium_GLEAN_10029107	725.545	130.242	2.4779	3.3944e-06	0.00056158	sp|Q9C8M5|WAG1_ARATH Serine/threonine-protein kinase WAG1 OS=Arabidopsis thaliana GN=WAG1 PE=2 SV=1//1.75551e-128
Dendrobium_GLEAN_10029675	343.071	35.8386	3.2589	0.00069159	0.043	-//-
Dendrobium_GLEAN_10030062	3793.84	1316.37	1.5271	0.0003634	0.025228	sp|O49607|SBT16_ARATH Subtilisin-like protease SBT1.6 OS=Arabidopsis thaliana GN=SBT1.6 PE=2 SV=1//0
Dendrobium_GLEAN_10030331	54.676	467.399	-3.0957	3.4547e-07	8.1542e-05	sp|Q8GRL4|HOX19_ORYSJ Homeobox-leucine zipper protein HOX19 OS=Oryza sativa subsp. japonica GN=HOX19 PE=2 SV=1//4.38619e-50
Dendrobium_GLEAN_10030433	1501.65	113.625	3.7242	3.5141e-06	0.00057072	sp|C0LGQ9|Y4294_ARATH Probable LRR receptor-like serine/threonine-protein kinase At4g20940 OS=Arabidopsis thaliana GN=At4g20940 PE=1 SV=1//0
Dendrobium_GLEAN_10030944	1043.52	282.634	1.8845	0.00011465	0.01025	sp|Q9LP77|Y1848_ARATH Probable inactive receptor kinase At1g48480 OS=Arabidopsis thaliana GN=RKL1 PE=2 SV=1//2.85857e-108
Dendrobium_GLEAN_10031145	1772.31	306.725	2.5306	8.085e-08	2.5332e-05	sp|Q9ZU91|E133_ARATH Glucan endo-1,3-beta-glucosidase 3 OS=Arabidopsis thaliana GN=At2g01630 PE=1 SV=2//2.98031e-14
Dendrobium_GLEAN_10031220	8523.32	1377.03	2.6299	0.00015489	0.013057	sp|Q8LF99|XTH6_ARATH Probable xyloglucan endotransglucosylase/hydrolase protein 6 OS=Arabidopsis thaliana GN=XTH6 PE=2 SV=2//9.65921e-125
Dendrobium_GLEAN_10031397	660.217	188.528	1.8082	0.00057058	0.037203	sp|O81312|GAE3_ARATH UDP-glucuronate 4-epimerase 3 OS=Arabidopsis thaliana GN=GAE3 PE=2 SV=1//0
Dendrobium_GLEAN_10031549	174.115	769.642	-2.1441	4.0569e-05	0.0043791	sp|Q2R2W1|ADO3_ORYSJ Adagio-like protein 3 OS=Oryza sativa subsp. japonica GN=Os11g0547000 PE=2 SV=2//2.09309e-08
Dendrobium_GLEAN_10031668	3350.85	700.961	2.2571	5.4596e-07	0.00011859	sp|Q8VZP6|GUX8_ARATH Putative glucuronosyltransferase PGSIP8 OS=Arabidopsis thaliana GN=PGSIP8 PE=2 SV=1//0
Dendrobium_GLEAN_10031738	93.0822	402.936	-2.114	0.00026435	0.019787	sp|Q9STN5|Y4833_ARATH Uncharacterized protein At4g08330, chloroplastic OS=Arabidopsis thaliana GN=At4g08330 PE=1 SV=1//5.82965e-33
Dendrobium_GLEAN_10031817	982.133	277.012	1.826	0.00019651	0.0156	sp|Q8W486|Y1491_ARATH Uncharacterized protein At1g04910 OS=Arabidopsis thaliana GN=At1g04910 PE=2 SV=1//1.66745e-64
Dendrobium_GLEAN_10032138	278.715	48.6417	2.5185	0.00022373	0.017145	sp|P74306|ZDS_SYNY3 Zeta-carotene desaturase OS=Synechocystis sp. (strain PCC 6803 / Kazusa) GN=crtQ PE=3 SV=1//5.61334e-09
Dendrobium_GLEAN_10032620	1050.38	303.411	1.7916	0.00020782	0.016171	sp|Q9FLP0|MA651_ARATH 65-kDa microtubule-associated protein 1 OS=Arabidopsis thaliana GN=MAP65-1 PE=1 SV=1//3.12998e-117
Dendrobium_GLEAN_10032668	16309	2532.6	2.687	5.0572e-10	2.6331e-07	sp|Q41607|SUS2_TULGE Sucrose synthase 2 OS=Tulipa gesneriana PE=2 SV=1//0
Dendrobium_GLEAN_10032788	5626.6	1523.23	1.8851	1.3095e-05	0.0017108	sp|Q9M3B0|PME34_ARATH Probable pectinesterase/pectinesterase inhibitor 34 OS=Arabidopsis thaliana GN=PME34 PE=2 SV=1//7.95064e-47
Dendrobium_GLEAN_10033115	1182.36	107.254	3.4626	2.6405e-05	0.0030451	sp|P31687|4CL2_SOYBN 4-coumarate--CoA ligase 2 OS=Glycine max PE=2 SV=2//0
Dendrobium_GLEAN_10033268	645.861	113.039	2.5144	0.00050647	0.033706	sp|Q9SZ06|EF109_ARATH Ethylene-responsive transcription factor ERF109 OS=Arabidopsis thaliana GN=ERF109 PE=1 SV=1//3.17903e-23
Dendrobium_GLEAN_10033303	685.908	1905.57	-1.4741	0.00085367	0.049793	sp|P25317|GSTXA_TOBAC Probable glutathione S-transferase parA OS=Nicotiana tabacum GN=PARA PE=2 SV=1//1.22755e-92
Dendrobium_GLEAN_10033373	5049.21	17950.7	-1.8299	1.1706e-05	0.0015696	sp|Q7X996|CIPK2_ORYSJ CBL-interacting protein kinase 2 OS=Oryza sativa subsp. japonica GN=CIPK2 PE=2 SV=1//0
Dendrobium_GLEAN_10033781	434.592	113.462	1.9375	0.00073012	0.044339	sp|Q9CAA9|BH049_ARATH Transcription factor bHLH49 OS=Arabidopsis thaliana GN=BHLH49 PE=1 SV=1//4.66624e-57
Dendrobium_GLEAN_10033828	572.244	25.4455	4.4912	4.4535e-07	9.8547e-05	-//-
Dendrobium_GLEAN_10034408	370.329	11.9218	4.9571	3.4363e-11	2.2121e-08	sp|C0LGS2|Y4361_ARATH Probable LRR receptor-like serine/threonine-protein kinase At4g36180 OS=Arabidopsis thaliana GN=At4g36180 PE=2 SV=1//0
Dendrobium_GLEAN_10034466	2205.75	642.236	1.7801	0.00054625	0.035948	sp|Q8RWU5|FBL3_ARATH F-box/LRR-repeat protein 3 OS=Arabidopsis thaliana GN=FBL3 PE=2 SV=1//1.19865e-159
Dendrobium_GLEAN_10034650	262.355	29.927	3.132	1.3795e-05	0.0017897	sp|P93508|CALR_RICCO Calreticulin OS=Ricinus communis PE=2 SV=1//3.8328e-176
Dendrobium_GLEAN_10034775	2565.74	9.9513	8.0103	1.5399e-37	2.7261e-33	sp|Q9XF43|KCS6_ARATH 3-ketoacyl-CoA synthase 6 OS=Arabidopsis thaliana GN=CUT1 PE=1 SV=1//1.28749e-160
Dendrobium_GLEAN_10034853	220.94	23.8437	3.212	3.5351e-05	0.0038991	-//-
Dendrobium_GLEAN_10035158	10561.8	771.571	3.7749	4.7302e-05	0.0049402	sp|Q9S746|HTH_ARATH Protein HOTHEAD OS=Arabidopsis thaliana GN=HTH PE=1 SV=1//2.3664e-122
Dendrobium_GLEAN_10035159	2563.55	141.131	4.183	0.00019167	0.015266	sp|Q9S746|HTH_ARATH Protein HOTHEAD OS=Arabidopsis thaliana GN=HTH PE=1 SV=1//5.57039e-68
Dendrobium_GLEAN_10035410	250.286	29.8174	3.0694	4.0412e-05	0.0043755	sp|O82259|NET3C_ARATH Protein NETWORKED 3C OS=Arabidopsis thaliana GN=NET3C PE=1 SV=1//5.5675e-07
Dendrobium_GLEAN_10035474	7952.3	2357.08	1.7544	3.4771e-05	0.0038591	sp|Q38910|XTH23_ARATH Probable xyloglucan endotransglucosylase/hydrolase protein 23 OS=Arabidopsis thaliana GN=XTH23 PE=2 SV=1//3.65566e-138
Dendrobium_GLEAN_10035677	3848.06	1403.19	1.4554	0.00057895	0.03761	sp|P40393|RIC2_ORYSJ Ras-related protein RIC2 OS=Oryza sativa subsp. japonica GN=RIC2 PE=2 SV=2//2.57342e-132
Dendrobium_GLEAN_10035871	870.216	251.175	1.7927	0.00040359	0.027692	sp|Q8W3M4|Y4744_ARATH Uncharacterized protein At4g06744 OS=Arabidopsis thaliana GN=At4g06744 PE=2 SV=1//1.8259e-96
Dendrobium_GLEAN_10035920	993.791	215.25	2.2069	0.00012869	0.011232	sp|P24465|C71A1_PERAE Cytochrome P450 71A1 OS=Persea americana GN=CYP71A1 PE=1 SV=2//2.66171e-137
Dendrobium_GLEAN_10036500	128.223	4.67867	4.7764	1.1944e-05	0.0015898	-//-
Dendrobium_GLEAN_10036502	1475.55	68.5528	4.4279	0.00070999	0.043641	sp|Q8W453|DIRL1_ARATH Putative lipid-transfer protein DIR1 OS=Arabidopsis thaliana GN=DIR1 PE=1 SV=1//2.04675e-15
Dendrobium_GLEAN_10036590	136.074	585.601	-2.1055	9.7524e-05	0.0090152	sp|Q9LYV6|GEML5_ARATH GEM-like protein 5 OS=Arabidopsis thaliana GN=At5g13200 PE=1 SV=1//6.82328e-102
Dendrobium_GLEAN_10037219	3852.4	47903	-3.6363	4.7691e-15	7.3413e-12	sp|Q9FMK7|BT1_ARATH BTB/POZ and TAZ domain-containing protein 1 OS=Arabidopsis thaliana GN=BT1 PE=1 SV=1//7.0764e-21
Dendrobium_GLEAN_10037220	1950.07	25611.6	-3.7152	1.8405e-16	3.2581e-13	sp|Q94BN0|BT2_ARATH BTB/POZ and TAZ domain-containing protein 2 OS=Arabidopsis thaliana GN=BT2 PE=1 SV=1//2.4398e-11
Dendrobium_GLEAN_10037233	250.013	3.85102	6.0206	0.00013061	0.011362	-//-
Dendrobium_GLEAN_10037542	444.36	97.641	2.1862	0.00021458	0.016595	sp|Q9ZR04|CCD61_ARATH Putative cyclin-D6-1 OS=Arabidopsis thaliana GN=CYCD6-1 PE=3 SV=1//3.98795e-56
Dendrobium_GLEAN_10037878	526.535	139.509	1.9162	0.00046354	0.031141	sp|F4HT41|SAMC2_ARATH Probable S-adenosylmethionine carrier 2, chloroplastic OS=Arabidopsis thaliana GN=SAMC2 PE=2 SV=1//6.42596e-07
Dendrobium_GLEAN_10037912	565.331	116.358	2.2805	8.495e-05	0.0081288	sp|Q9SKT1|ERF53_ARATH Ethylene-responsive transcription factor ERF053 OS=Arabidopsis thaliana GN=ERF053 PE=2 SV=1//4.29954e-44
Dendrobium_GLEAN_10037916	2257.75	416.173	2.4396	0.0001042	0.0095086	-//-
Dendrobium_GLEAN_10037982	95.2249	6.28043	3.9224	0.00065078	0.041515	sp|Q9FLX5|AB8G_ARATH ABC transporter G family member 8 OS=Arabidopsis thaliana GN=ABCG8 PE=2 SV=1//3.92483e-147
Dendrobium_GLEAN_10038322	988.474	177.319	2.4789	1.0485e-06	0.00020286	sp|Q6RVV4|TIC32_PEA Short-chain dehydrogenase TIC 32, chloroplastic OS=Pisum sativum GN=TIC32 PE=1 SV=1//8.83081e-122
Dendrobium_GLEAN_10038455	2288.71	672.626	1.7667	8.7127e-05	0.0081834	sp|Q56X72|RTNLS_ARATH Reticulon-like protein B21 OS=Arabidopsis thaliana GN=RTNLB21 PE=2 SV=2//7.35648e-33
Dendrobium_GLEAN_10038618	349.411	79.709	2.1321	0.00067161	0.042235	sp|Q96376|LIS_CLABR S-linalool synthase OS=Clarkia breweri GN=LIS PE=2 SV=1//2.75368e-17
Dendrobium_GLEAN_10038620	2157.23	603.325	1.8382	6.6873e-05	0.0066136	sp|G1DGI7|TPS7_SELML (13E)-labda-7,13-dien-15-ol synthase OS=Selaginella moellendorffii GN=SELMODRAFT_120716 PE=1 SV=2//7.71273e-32
Dendrobium_GLEAN_10038798	1285.76	345.989	1.8938	6.085e-05	0.0061289	sp|Q9ZR72|AB1B_ARATH ABC transporter B family member 1 OS=Arabidopsis thaliana GN=ABCB1 PE=1 SV=1//2.70151e-93
Dendrobium_GLEAN_10038800	984.576	263.578	1.9013	0.00010889	0.0098599	sp|Q9ZR72|AB1B_ARATH ABC transporter B family member 1 OS=Arabidopsis thaliana GN=ABCB1 PE=1 SV=1//4.58631e-07
Dendrobium_GLEAN_10039128	137.007	6.73929	4.3455	2.0107e-05	0.0024051	-//-
Dendrobium_GLEAN_10039419	74375.2	16002.4	2.2165	1.8284e-07	4.8308e-05	sp|Q9T0I5|PRP4_ARATH Proline-rich protein 4 OS=Arabidopsis thaliana GN=PRP4 PE=2 SV=1//1.39924e-12
Dendrobium_GLEAN_10040302	1623.03	272.865	2.5724	7.0037e-08	2.214e-05	sp|B7F9G7|ADPO1_ORYSJ Heptahelical transmembrane protein ADIPOR1 OS=Oryza sativa subsp. japonica GN=ADIPOR1 PE=2 SV=1//4.1415e-87
Dendrobium_GLEAN_10040440	2642.18	945.736	1.4822	0.00076931	0.046165	sp|Q9M2E8|HDG1_ARATH Homeobox-leucine zipper protein HDG1 OS=Arabidopsis thaliana GN=HDG1 PE=2 SV=1//0
Dendrobium_GLEAN_10040599	136.468	0.962755	7.1472	3.5596e-08	1.2603e-05	sp|Q7XKV4|BGL12_ORYSJ Beta-glucosidase 12 OS=Oryza sativa subsp. japonica GN=BGLU12 PE=2 SV=2//1.92503e-84
Dendrobium_GLEAN_10040642	2253.99	782.886	1.5256	0.00051861	0.034449	sp|Q8L9P8|RLF33_ARATH Protein RALF-like 33 OS=Arabidopsis thaliana GN=RALFL33 PE=2 SV=1//4.95166e-32
Dendrobium_GLEAN_10040670	129.047	918.478	-2.8314	9.9247e-08	2.9098e-05	sp|P21342|PFPA_SOLTU Pyrophosphate--fructose 6-phosphate 1-phosphotransferase subunit alpha OS=Solanum tuberosum GN=PFP-ALPHA PE=1 SV=2//9.09942e-119
Dendrobium_GLEAN_10040737	1375.17	70.0194	4.2957	3.0151e-06	0.00051322	-//-
Dendrobium_GLEAN_10040898	275.221	43.6027	2.6581	0.00013496	0.011683	sp|Q8VY90|EF105_ARATH Ethylene-responsive transcription factor ERF105 OS=Arabidopsis thaliana GN=ERF105 PE=2 SV=1//4.81472e-33
Dendrobium_GLEAN_10040982	220.467	16.6371	3.7281	3.5805e-06	0.00057884	-//-
Dendrobium_GLEAN_10041164	932.707	175.281	2.4118	3.0541e-06	0.00051727	sp|Q6YWF1|GAP1_ORYSJ GTPase activating protein 1 OS=Oryza sativa subsp. japonica GN=GAP1 PE=1 SV=1//2.24511e-35
Dendrobium_GLEAN_10041221	155.01	3.4372	5.495	2.2031e-05	0.0025914	sp|Q5QNI5|BZP02_ORYSJ Basic leucine zipper 2 OS=Oryza sativa subsp. japonica GN=BZIP02 PE=2 SV=1//9.97777e-68
Dendrobium_GLEAN_10041296	1511.96	474.602	1.6716	0.00031912	0.022917	sp|Q2HU65|H2A2_MEDTR Probable histone H2A.2 OS=Medicago truncatula GN=MtrDRAFT_AC149210g4v1 PE=3 SV=1//2.76948e-45
Dendrobium_GLEAN_10041488	27.9551	268.665	-3.2646	7.1004e-06	0.0010292	sp|Q9STK7|C71AQ_ARATH Cytochrome P450 71A26 OS=Arabidopsis thaliana GN=CYP71A26 PE=3 SV=1//1.07014e-72
Dendrobium_GLEAN_10041583	6208.48	224.22	4.7913	9.0184e-23	2.4561e-19	sp|Q766C3|NEP1_NEPGR Aspartic proteinase nepenthesin-1 OS=Nepenthes gracilis GN=nep1 PE=1 SV=1//1.45145e-29
Dendrobium_GLEAN_10041596	218.876	5.18256	5.4003	1.5103e-05	0.0019393	-//-
Dendrobium_GLEAN_10041665	166.787	0	Inf	3.548e-11	2.2431e-08	sp|O64495|SBT12_ARATH Subtilisin-like protease SBT1.2 OS=Arabidopsis thaliana GN=SBT1.2 PE=2 SV=1//1.2687e-155
Dendrobium_GLEAN_10041778	4331.56	907.266	2.2553	2.9247e-07	7.2411e-05	sp|Q9LT79|PUB25_ARATH U-box domain-containing protein 25 OS=Arabidopsis thaliana GN=PUB25 PE=2 SV=1//5.14898e-88
Dendrobium_GLEAN_10042014	370.933	35.5769	3.3821	3.996e-07	9.0113e-05	sp|Q8LFN2|Y3037_ARATH Probable inactive leucine-rich repeat receptor-like protein kinase At3g03770 OS=Arabidopsis thaliana GN=At3g03770 PE=2 SV=1//3.05066e-111
Dendrobium_GLEAN_10042271	484.884	13.0197	5.2189	8.7475e-08	2.6931e-05	-//-
Dendrobium_GLEAN_10042309	136.337	6.32546	4.4299	1.6272e-05	0.0020575	sp|Q67UL3|PIN1C_ORYSJ Probable auxin efflux carrier component 1c OS=Oryza sativa subsp. japonica GN=PIN1C PE=2 SV=1//0
Dendrobium_GLEAN_10042314	114.751	4.81378	4.5752	4.302e-05	0.0046016	sp|Q67UL3|PIN1C_ORYSJ Probable auxin efflux carrier component 1c OS=Oryza sativa subsp. japonica GN=PIN1C PE=2 SV=1//0
Dendrobium_GLEAN_10042588	756.954	217.58	1.7987	0.00044256	0.029845	-//-
Dendrobium_GLEAN_10042741	974.368	23.0526	5.4015	0.00073775	0.044647	sp|Q9SF32|IQD1_ARATH Protein IQ-DOMAIN 1 OS=Arabidopsis thaliana GN=IQD1 PE=1 SV=1//1.05936e-07
Dendrobium_GLEAN_10042743	349.007	6.32546	5.7859	0.00043077	0.029105	-//-
Dendrobium_GLEAN_10042879	566.593	47.3467	3.581	3.2854e-09	1.4832e-06	sp|Q8L7Q7|PME64_ARATH Probable pectinesterase/pectinesterase inhibitor 64 OS=Arabidopsis thaliana GN=PME64 PE=2 SV=2//1.21195e-37
Dendrobium_GLEAN_10043007	2445.71	320.038	2.9339	4.9337e-10	2.6071e-07	sp|Q766C3|NEP1_NEPGR Aspartic proteinase nepenthesin-1 OS=Nepenthes gracilis GN=nep1 PE=1 SV=1//2.62697e-39
Dendrobium_GLEAN_10043087	1639.79	223.444	2.8755	0.00072387	0.044136	sp|P29162|ASOL_TOBAC L-ascorbate oxidase homolog OS=Nicotiana tabacum PE=2 SV=1//3.78685e-179
Dendrobium_GLEAN_10043120	2612.18	354.173	2.8827	8.004e-10	3.9358e-07	sp|Q9ZPX9|KIC_ARATH Calcium-binding protein KIC OS=Arabidopsis thaliana GN=KIC PE=1 SV=2//3.55371e-38
Dendrobium_GLEAN_10043898	330.347	15.2324	4.4388	8.7901e-05	0.0082331	sp|Q9FII5|TDR_ARATH Leucine-rich repeat receptor-like protein kinase TDR OS=Arabidopsis thaliana GN=TDR PE=1 SV=1//4.79534e-17
Dendrobium_GLEAN_10044155	608.547	68.229	3.1569	6.0914e-08	1.9786e-05	sp|Q9SZ06|EF109_ARATH Ethylene-responsive transcription factor ERF109 OS=Arabidopsis thaliana GN=ERF109 PE=1 SV=1//3.26708e-27
Dendrobium_GLEAN_10044197	2465.54	15.908	7.276	3.7362e-09	1.6132e-06	sp|Q8RW93|LBP65_ARATH Putative lipid-binding protein At4g00165 OS=Arabidopsis thaliana GN=At4g00165 PE=2 SV=1//9.45559e-17
Dendrobium_GLEAN_10044227	1702.91	505.305	1.7528	0.00012262	0.010799	-//-
Dendrobium_GLEAN_10044420	1342.83	373.183	1.8473	0.00016451	0.013649	sp|Q94CH6|EXL3_ARATH GDSL esterase/lipase EXL3 OS=Arabidopsis thaliana GN=EXL3 PE=2 SV=1//4.8748e-86
Dendrobium_GLEAN_10044578	1175.72	11.5531	6.6691	2.0687e-25	7.3241e-22	sp|Q00874|DR100_ARATH DNA-damage-repair/toleration protein DRT100 OS=Arabidopsis thaliana GN=DRT100 PE=2 SV=2//1.74807e-140
Dendrobium_GLEAN_10044684	1025.07	285.201	1.8457	0.00016259	0.013576	sp|Q9LX14|UFC_ARATH Protein UPSTREAM OF FLC OS=Arabidopsis thaliana GN=UFC PE=2 SV=1//9.83564e-32
Dendrobium_GLEAN_10044714	298.294	44.9708	2.7297	0.00081405	0.048079	-//-
Dendrobium_GLEAN_10045399	22.4666	250.606	-3.4796	4.5474e-06	0.00069697	sp|Q9FDW1|MYB44_ARATH Transcription factor MYB44 OS=Arabidopsis thaliana GN=MYB44 PE=2 SV=1//8.03203e-34
Dendrobium_GLEAN_10045680	383.021	1532.52	-2.0004	1.38e-05	0.0017897	sp|Q9AT54|SCGT_TOBAC Scopoletin glucosyltransferase OS=Nicotiana tabacum GN=TOGT1 PE=1 SV=1//3.8701e-46
Dendrobium_GLEAN_10045745	141.55	978.212	-2.7888	7.4543e-07	0.00014995	-//-
Dendrobium_GLEAN_10046043	214.768	1.88047	6.8355	6.2284e-11	3.7376e-08	sp|Q39176|ERLI1_ARATH Lipid transfer protein EARLI 1 OS=Arabidopsis thaliana GN=EARLI1 PE=1 SV=1//1.12607e-18
Dendrobium_GLEAN_10046059	144.374	1.83544	6.2975	1.4535e-07	3.9585e-05	-//-
Dendrobium_GLEAN_10046189	10311.1	1139.54	3.1777	1.0165e-12	9.727e-10	sp|O22126|FLA8_ARATH Fasciclin-like arabinogalactan protein 8 OS=Arabidopsis thaliana GN=FLA8 PE=1 SV=1//1.10012e-131
Dendrobium_GLEAN_10046192	1476.75	389.615	1.9223	4.2345e-05	0.0045569	sp|Q7XJ98|KATAM_ARATH Xyloglucan galactosyltransferase KATAMARI1 OS=Arabidopsis thaliana GN=KAM1 PE=1 SV=1//2.87675e-78
Dendrobium_GLEAN_10047056	7031.56	19705.3	-1.4867	0.00030124	0.021766	sp|O82627|SSG1_ANTMA Granule-bound starch synthase 1, chloroplastic/amyloplastic OS=Antirrhinum majus GN=WAXY PE=2 SV=1//0
Dendrobium_GLEAN_10047213	2729.38	701.136	1.9608	1.0809e-05	0.0014607	sp|Q8L868|E1311_ARATH Glucan endo-1,3-beta-glucosidase 11 OS=Arabidopsis thaliana GN=At1g32860 PE=1 SV=1//3.85721e-58
Dendrobium_GLEAN_10047247	194.219	16.4654	3.5602	0.00083062	0.048851	sp|Q9FLV9|SLAH3_ARATH S-type anion channel SLAH3 OS=Arabidopsis thaliana GN=SLAH3 PE=1 SV=1//0
Dendrobium_GLEAN_10047925	9231.61	2159	2.0962	8.7799e-07	0.00017366	sp|O04621|TBL26_ARATH Protein trichome birefringence-like 26 OS=Arabidopsis thaliana GN=TBL26 PE=2 SV=1//1.41648e-138
Dendrobium_GLEAN_10048035	552.862	35.3798	3.9659	1.6347e-10	9.4877e-08	sp|Q8W4K5|VAB_ARATH VAN3-binding protein OS=Arabidopsis thaliana GN=VAB PE=1 SV=1//1.03022e-29
Dendrobium_GLEAN_10048036	574.631	66.7369	3.1061	9.9446e-08	2.9098e-05	sp|Q8W4K5|VAB_ARATH VAN3-binding protein OS=Arabidopsis thaliana GN=VAB PE=1 SV=1//7.81909e-25
Dendrobium_GLEAN_10048434	2.9151	109.971	-5.2374	1.9169e-05	0.0023242	sp|O23547|EXLB1_ARATH Expansin-like B1 OS=Arabidopsis thaliana GN=EXLB1 PE=2 SV=2//3.58873e-77
Dendrobium_GLEAN_10048521	187.44	895.349	-2.256	7.4724e-06	0.0010755	-//-
Dendrobium_GLEAN_10049035	666.247	111.426	2.58	1.0044e-05	0.001373	sp|Q6NMJ2|OLE96_ARATH Pollen-specific protein-like At4g18596 OS=Arabidopsis thaliana GN=At4g18596 PE=2 SV=1//2.82116e-06
Dendrobium_GLEAN_10049041	3293.3	132.359	4.637	0.00050303	0.03354	sp|Q9SZN7|HIP26_ARATH Heavy metal-associated isoprenylated plant protein 26 OS=Arabidopsis thaliana GN=HIPP26 PE=1 SV=1//1.32428e-06
Dendrobium_GLEAN_10049053	1757.76	415.27	2.0816	0.00027048	0.020099	sp|O23826|K125_TOBAC 125 kDa kinesin-related protein OS=Nicotiana tabacum GN=TKRP125 PE=1 SV=1//0
Dendrobium_GLEAN_10049214	24745	154.015	7.3279	1.5506e-08	5.7186e-06	-//-
Dendrobium_GLEAN_10049299	1587.41	139.659	3.5067	5.4653e-12	4.3e-09	sp|P24465|C71A1_PERAE Cytochrome P450 71A1 OS=Persea americana GN=CYP71A1 PE=1 SV=2//1.2789e-124
Dendrobium_GLEAN_10049312	6509.19	156.4	5.3792	1.1658e-26	5.8965e-23	sp|Q93VR4|ML423_ARATH MLP-like protein 423 OS=Arabidopsis thaliana GN=MLP423 PE=2 SV=1//2.17533e-41
Dendrobium_GLEAN_10049468	8180.4	1604.26	2.3503	4.268e-08	1.4391e-05	sp|Q43062|PME_PRUPE Pectinesterase/pectinesterase inhibitor PPE8B OS=Prunus persica PE=2 SV=1//0
Dendrobium_GLEAN_10049500	156.455	11.8318	3.725	6.4951e-05	0.0064414	sp|Q8S905|NACK1_ARATH Kinesin-like protein NACK1 OS=Arabidopsis thaliana GN=NACK1 PE=1 SV=1//1.74952e-11
Dendrobium_GLEAN_10049766	2283.09	424.699	2.4265	1.4956e-07	4.0421e-05	sp|Q9LZW3|PUB16_ARATH U-box domain-containing protein 16 OS=Arabidopsis thaliana GN=PUB16 PE=2 SV=1//1.67539e-159
Dendrobium_GLEAN_10049832	1188.64	30.628	5.2783	1.5491e-19	3.2262e-16	sp|Q8W453|DIRL1_ARATH Putative lipid-transfer protein DIR1 OS=Arabidopsis thaliana GN=DIR1 PE=1 SV=1//7.158e-11
Dendrobium_GLEAN_10050212	2011.4	31.0699	6.0165	7.4601e-10	3.7201e-07	sp|Q9FE46|GSTFC_ARATH Glutathione S-transferase F12 OS=Arabidopsis thaliana GN=GSTF12 PE=1 SV=1//2.30308e-36
Dendrobium_GLEAN_10050301	1432.77	138.772	3.368	0.00072428	0.044136	sp|C0LGE4|Y1124_ARATH Probable LRR receptor-like serine/threonine-protein kinase At1g12460 OS=Arabidopsis thaliana GN=At1g12460 PE=2 SV=1//0
Dendrobium_GLEAN_10050381	1023.95	254.823	2.0066	0.00022782	0.017355	sp|Q93ZS4|NIK3_ARATH Protein NSP-INTERACTING KINASE 3 OS=Arabidopsis thaliana GN=NIK3 PE=1 SV=1//5.35983e-151
Dendrobium_GLEAN_10050403	433.763	66.7539	2.7	9.739e-06	0.0013365	sp|Q9LVM0|Y5830_ARATH Probable inactive receptor kinase At5g58300 OS=Arabidopsis thaliana GN=At5g58300 PE=2 SV=1//1.13765e-97
Dendrobium_GLEAN_10050404	418.716	81.9158	2.3538	7.9929e-05	0.0076899	sp|Q9LVM0|Y5830_ARATH Probable inactive receptor kinase At5g58300 OS=Arabidopsis thaliana GN=At5g58300 PE=2 SV=1//8.62899e-121
Dendrobium_GLEAN_10050479	131.991	11.2293	3.5551	0.00023623	0.017833	sp|P27347|MNB1B_MAIZE DNA-binding protein MNB1B OS=Zea mays GN=MNB1B PE=1 SV=1//6.7349e-30
Dendrobium_GLEAN_10050536	330.685	30.1692	3.4543	7.2223e-07	0.00014696	sp|P29162|ASOL_TOBAC L-ascorbate oxidase homolog OS=Nicotiana tabacum PE=2 SV=1//6.35952e-61
Dendrobium_GLEAN_10050539	1843.91	165.639	3.4767	2.5383e-12	2.2468e-09	sp|Q00624|ASOL_BRANA L-ascorbate oxidase homolog OS=Brassica napus GN=Bp10 PE=2 SV=1//6.46248e-112
Dendrobium_GLEAN_10050693	431.926	44.7261	3.2716	3.4366e-07	8.1542e-05	sp|Q9LRT1|Y3804_ARATH Probably inactive leucine-rich repeat receptor-like protein kinase At3g28040 OS=Arabidopsis thaliana GN=At3g28040 PE=2 SV=1//4.3503e-38
Dendrobium_GLEAN_10050694	1622.93	163.438	3.3118	5.0205e-11	3.1184e-08	sp|Q9LRT1|Y3804_ARATH Probably inactive leucine-rich repeat receptor-like protein kinase At3g28040 OS=Arabidopsis thaliana GN=At3g28040 PE=2 SV=1//4.61501e-11
Dendrobium_GLEAN_10051071	349.319	25.7607	3.7613	6.6831e-08	2.151e-05	sp|Q9LFH9|LRK81_ARATH L-type lectin-domain containing receptor kinase VIII.1 OS=Arabidopsis thaliana GN=LECRK81 PE=2 SV=1//1.29535e-107
Dendrobium_GLEAN_10051073	298.949	25.4004	3.557	8.9431e-07	0.0001759	sp|Q9LYX1|LRK82_ARATH L-type lectin-domain containing receptor kinase VIII.2 OS=Arabidopsis thaliana GN=LECRK82 PE=2 SV=1//8.04453e-77
Dendrobium_GLEAN_10051100	3557.53	482.374	2.8826	1.2241e-07	3.4397e-05	-//-
Dendrobium_GLEAN_10051428	7994.06	119.086	6.0689	5.896e-05	0.0059642	sp|Q42952|NLTP1_TOBAC Non-specific lipid-transfer protein 1 OS=Nicotiana tabacum GN=LTP1 PE=1 SV=1//1.21639e-27
Dendrobium_GLEAN_10051437	9329.87	2327.31	2.0032	0.00011913	0.010595	sp|Q9LE73|NUDT4_ARATH Nudix hydrolase 4 OS=Arabidopsis thaliana GN=NUDT4 PE=1 SV=1//5.21004e-57
Dendrobium_GLEAN_10051470	200.324	12.057	4.0544	2.2116e-06	0.00038955	sp|Q9SUQ3|Y4374_ARATH Probable inactive receptor kinase At4g23740 OS=Arabidopsis thaliana GN=At4g23740 PE=2 SV=1//0
Dendrobium_GLEAN_10051522	1324.25	302.528	2.13	8.8773e-06	0.0012472	sp|Q9FHK4|Y5519_ARATH Uncharacterized protein At5g05190 OS=Arabidopsis thaliana GN=Y-1 PE=1 SV=1//1.66413e-07
Dendrobium_GLEAN_10052187	2983.56	12219.6	-2.0341	1.1711e-06	0.00022055	sp|P93788|REMO_SOLTU Remorin OS=Solanum tuberosum PE=1 SV=1//4.83316e-14
Dendrobium_GLEAN_10052334	1350.41	277.783	2.2814	2.6207e-06	0.00045707	sp|Q6EP77|DRE1G_ORYSJ Dehydration-responsive element-binding protein 1G OS=Oryza sativa subsp. japonica GN=DREB1G PE=2 SV=1//9.51626e-48
Dendrobium_GLEAN_10052795	536.345	21.2341	4.6587	0.00017352	0.014145	sp|P14009|14KD_DAUCA 14 kDa proline-rich protein DC2.15 OS=Daucus carota PE=2 SV=1//1.35744e-27
Dendrobium_GLEAN_10052798	412.848	14.5849	4.8231	3.6637e-06	0.00058693	-//-
Dendrobium_GLEAN_10053284	243.262	950.765	-1.9666	8.6701e-05	0.0081834	sp|Q9LDD1|BRG3_ARATH Probable BOI-related E3 ubiquitin-protein ligase 3 OS=Arabidopsis thaliana GN=BRG3 PE=1 SV=1//5.33174e-58
Dendrobium_GLEAN_10053553	1204.88	142.192	3.083	3.7874e-05	0.0041386	sp|Q94BT9|ATOX1_ARATH Copper transport protein ATX1 OS=Arabidopsis thaliana GN=ATX1 PE=1 SV=1//4.62896e-09
Dendrobium_GLEAN_10053592	619.118	72.3978	3.0962	5.283e-08	1.7481e-05	sp|Q9C554|EXPA1_ARATH Expansin-A1 OS=Arabidopsis thaliana GN=EXPA1 PE=2 SV=1//1.70565e-132
Dendrobium_GLEAN_10053692	174.324	12.5158	3.7999	1.9411e-05	0.0023376	-//-
Dendrobium_GLEAN_10054205	166.486	1.42161	6.8717	3.3095e-09	1.4832e-06	sp|Q9FE46|GSTFC_ARATH Glutathione S-transferase F12 OS=Arabidopsis thaliana GN=GSTF12 PE=1 SV=1//2.8994e-34
Dendrobium_GLEAN_10054539	192.42	23.3313	3.0439	0.00013852	0.011949	-//-
Dendrobium_GLEAN_10054542	1143.15	4181.5	-1.871	1.6085e-05	0.0020412	sp|Q689G6|PRR95_ORYSJ Two-component response regulator-like PRR95 OS=Oryza sativa subsp. japonica GN=PRR95 PE=2 SV=1//1.33066e-78
Dendrobium_GLEAN_10054606	380.674	17.0228	4.483	6.5412e-10	3.3085e-07	sp|Q38910|XTH23_ARATH Probable xyloglucan endotransglucosylase/hydrolase protein 23 OS=Arabidopsis thaliana GN=XTH23 PE=2 SV=1//7.37123e-136
Dendrobium_GLEAN_10054762	172.658	3.80598	5.5035	0.00018038	0.014567	sp|Q39261|ZFP2_ARATH Zinc finger protein 2 OS=Arabidopsis thaliana GN=ZFP2 PE=2 SV=1//2.2625e-16
Dendrobium_GLEAN_10054902	307.275	57.3065	2.4228	0.00021968	0.016908	sp|Q8L7W8|FUCO2_ARATH Alpha-L-fucosidase 2 OS=Arabidopsis thaliana GN=FUC95A PE=1 SV=1//4.02804e-12
Dendrobium_GLEAN_10056155	93.3474	0.917719	6.6684	6.3366e-06	0.0009309	sp|O64495|SBT12_ARATH Subtilisin-like protease SBT1.2 OS=Arabidopsis thaliana GN=SBT1.2 PE=2 SV=1//2.71501e-116
Dendrobium_GLEAN_10056163	345.528	1.88047	7.5216	0.00033221	0.023571	sp|O64495|SBT12_ARATH Subtilisin-like protease SBT1.2 OS=Arabidopsis thaliana GN=SBT1.2 PE=2 SV=1//2.65063e-155
Dendrobium_GLEAN_10056255	251.443	33.9301	2.8896	6.7573e-05	0.0066642	sp|Q69ZM6|STK36_MOUSE Serine/threonine-protein kinase 36 OS=Mus musculus GN=Stk36 PE=1 SV=3//1.34541e-34
Dendrobium_GLEAN_10056260	1475.21	316.397	2.2211	2.8569e-06	0.000491	sp|Q76MV0|H32_TOBAC Histone H3.2 OS=Nicotiana tabacum GN=B34 PE=1 SV=1//4.31271e-92
Dendrobium_GLEAN_10056285	2733.59	535.281	2.3524	2.4918e-07	6.3016e-05	sp|Q9FT45|FLA15_ARATH Fasciclin-like arabinogalactan protein 15 OS=Arabidopsis thaliana GN=FLA15 PE=2 SV=1//2.44975e-96
Dendrobium_GLEAN_10056490	253.121	35.1461	2.8484	0.00017014	0.013944	sp|E3SXU4|BHLHW_PEA Basic helix-loop-helix protein A OS=Pisum sativum GN=BHLH PE=3 SV=1//4.40998e-129
Dendrobium_GLEAN_10056653	384.604	24.5192	3.9714	0.00016916	0.013928	sp|Q9FSG7|TP1A_MALDO Thaumatin-like protein 1a OS=Malus domestica GN=TL1 PE=1 SV=1//4.3299e-26
Dendrobium_GLEAN_10056729	83.2095	465.275	-2.4833	2.6237e-05	0.0030357	-//-
Dendrobium_GLEAN_10056764	2176.86	639.478	1.7673	8.6943e-05	0.0081834	sp|Q6ZAL2|TPP6_ORYSJ Probable trehalose-phosphate phosphatase 6 OS=Oryza sativa subsp. japonica GN=TPP6 PE=2 SV=1//3.07672e-128
Dendrobium_GLEAN_10056886	475.312	21.2707	4.4819	2.2747e-05	0.0026668	sp|Q9LNU1|CRSP_ARATH CO(2)-response secreted protease OS=Arabidopsis thaliana GN=CRSP PE=2 SV=1//0
Dendrobium_GLEAN_10057223	319.906	51.7721	2.6274	7.6017e-05	0.0073535	sp|Q9XI37|PV42A_ARATH SNF1-related protein kinase regulatory subunit gamma-like PV42a OS=Arabidopsis thaliana GN=PV42A PE=2 SV=1//4.34382e-92
Dendrobium_GLEAN_10057311	577.87	117.293	2.3006	0.00038212	0.026424	sp|Q6L5F4|CML14_ORYSJ Probable calcium-binding protein CML14 OS=Oryza sativa subsp. japonica GN=CML14 PE=2 SV=1//6.16679e-67
Dendrobium_GLEAN_10057390	9930.45	2203.96	2.1718	4.5255e-05	0.0047829	sp|Q9M667|RPP13_ARATH Disease resistance protein RPP13 OS=Arabidopsis thaliana GN=RPP13 PE=2 SV=2//1.75311e-46
Dendrobium_GLEAN_10058105	75.9493	1.37658	5.7859	0.0006584	0.041747	sp|Q0JIF2|CCB11_ORYSJ Cyclin-B1-1 OS=Oryza sativa subsp. japonica GN=CYCB1-1 PE=2 SV=2//3.46325e-152
Dendrobium_GLEAN_10058409	733.985	2092.32	-1.5113	0.00069349	0.043	-//-
Dendrobium_GLEAN_10058410	6688.7	20136.5	-1.59	0.00012429	0.01092	sp|Q9SJ56|BLH1_ARATH BEL1-like homeodomain protein 1 OS=Arabidopsis thaliana GN=BLH1 PE=1 SV=1//5.58471e-110
Dendrobium_GLEAN_10058470	263.432	1.46665	7.4888	3.4898e-06	0.00056939	sp|Q9FVA1|LEC1_CROVR Mannose-specific lectin 1 OS=Crocus vernus GN=LECCVA1 PE=1 SV=1//5.78765e-19
Dendrobium_GLEAN_10058603	9.53282	120.381	-3.6586	0.0003107	0.022404	sp|Q9SHJ5|GPAT1_ARATH Glycerol-3-phosphate acyltransferase 1 OS=Arabidopsis thaliana GN=GPAT1 PE=1 SV=1//9.94472e-87
Dendrobium_GLEAN_10058697	1341.53	192.543	2.8006	1.4464e-08	5.3906e-06	sp|Q9SCU1|PATL6_ARATH Patellin-6 OS=Arabidopsis thaliana GN=PATL6 PE=2 SV=1//0
Dendrobium_GLEAN_10058953	415.129	54.1565	2.9384	3.4615e-06	0.00056738	sp|Q9M0I2|EXPB3_ARATH Expansin-B3 OS=Arabidopsis thaliana GN=EXPB3 PE=2 SV=2//1.74451e-16
Dendrobium_GLEAN_10058957	400.436	53.3373	2.9084	5.3462e-06	0.00080204	sp|Q0DZ85|EXB16_ORYSJ Expansin-B16 OS=Oryza sativa subsp. japonica GN=EXPB16 PE=3 SV=1//7.16693e-77
Dendrobium_GLEAN_10059031	2923.84	514.081	2.5078	3.7789e-08	1.3117e-05	sp|Q9FF10|HPSE1_ARATH Heparanase-like protein 1 OS=Arabidopsis thaliana GN=At5g07830 PE=2 SV=1//0
Dendrobium_GLEAN_10059068	449.585	31.8695	3.8183	6.0229e-09	2.5386e-06	sp|Q9FR99|ACCO_MUSAC 1-aminocyclopropane-1-carboxylate oxidase OS=Musa acuminata GN=MAO1B PE=3 SV=1//4.63147e-88
Dendrobium_GLEAN_10059071	372.704	31.4642	3.5663	1.6866e-07	4.4898e-05	sp|Q0WPW4|ACCO5_ARATH 1-aminocyclopropane-1-carboxylate oxidase 5 OS=Arabidopsis thaliana GN=At1g77330 PE=2 SV=1//1.30249e-34
Dendrobium_GLEAN_10059360	46510	11122.7	2.064	7.912e-07	0.00015737	sp|Q9SB81|PER42_ARATH Peroxidase 42 OS=Arabidopsis thaliana GN=PER42 PE=1 SV=2//0
Dendrobium_GLEAN_10059590	1787.05	443.03	2.0121	0.00054277	0.035786	sp|Q9LYT5|PME35_ARATH Probable pectinesterase/pectinesterase inhibitor 35 OS=Arabidopsis thaliana GN=PME35 PE=2 SV=1//4.77719e-87
Dendrobium_GLEAN_10060246	1684.86	122.467	3.7822	8.3602e-10	4.0547e-07	sp|Q9LXD9|PME51_ARATH Probable pectinesterase/pectinesterase inhibitor 51 OS=Arabidopsis thaliana GN=PME51 PE=2 SV=1//1.58074e-168
Dendrobium_GLEAN_10060262	187.704	28.9362	2.6975	0.00077256	0.046174	-//-
Dendrobium_GLEAN_10060315	963.166	163.443	2.559	1.997e-05	0.0023968	sp|Q8RWL0|E2FF_ARATH E2F transcription factor-like E2FF OS=Arabidopsis thaliana GN=E2FF PE=2 SV=1//6.795e-08
Dendrobium_GLEAN_10060318	631.866	123.503	2.3551	1.733e-05	0.0021499	sp|Q8LSZ4|E2FE_ARATH E2F transcription factor-like E2FE OS=Arabidopsis thaliana GN=E2FE PE=2 SV=1//4.72161e-35
Dendrobium_GLEAN_10060322	3269.97	38.223	6.4187	4.3119e-31	5.0888e-27	sp|Q9SU35|ERLL1_ARATH pEARLI1-like lipid transfer protein 1 OS=Arabidopsis thaliana GN=AZI1 PE=1 SV=1//6.29122e-14
Dendrobium_GLEAN_10060618	1786.28	95.9943	4.2179	8.6387e-05	0.0081834	sp|Q653V7|AGLU_ORYSJ Probable alpha-glucosidase Os06g0675700 OS=Oryza sativa subsp. japonica GN=Os06g0675700 PE=1 SV=1//0
Dendrobium_GLEAN_10060902	107.921	1.97055	5.7752	0.00014989	0.012696	sp|A7LXU3|BGH3B_BACO1 Beta-glucosidase BoGH3B OS=Bacteroides ovatus (strain ATCC 8483 / DSM 1896 / JCM 5824 / NCTC 11153) GN=BACOVA_02659 PE=1 SV=1//1.96615e-78
Dendrobium_GLEAN_10060914	550.417	69.6617	2.9821	3.0313e-07	7.351e-05	sp|Q9SJ81|FLA7_ARATH Fasciclin-like arabinogalactan protein 7 OS=Arabidopsis thaliana GN=FLA7 PE=1 SV=1//1.03956e-60
Dendrobium_GLEAN_10061306	719.46	190.797	1.9149	0.000236	0.017833	sp|Q8RWD0|COL16_ARATH Zinc finger protein CONSTANS-LIKE 16 OS=Arabidopsis thaliana GN=COL16 PE=2 SV=2//1.07348e-40
Dendrobium_GLEAN_10061460	2633.97	739.386	1.8328	4.5795e-05	0.0048112	sp|Q9SIT1|TMK3_ARATH Receptor-like kinase TMK3 OS=Arabidopsis thaliana GN=TMK3 PE=2 SV=1//0
Dendrobium_GLEAN_10061524	5126.11	1386.84	1.8861	4.7077e-05	0.0049313	-//-
Dendrobium_GLEAN_10061807	1024.24	337.614	1.6011	0.00082384	0.048533	sp|Q9SV30|GATA8_ARATH GATA transcription factor 8 OS=Arabidopsis thaliana GN=GATA8 PE=2 SV=1//8.89396e-37
Dendrobium_GLEAN_10061980	320.787	52.1689	2.6204	6.3142e-05	0.0062973	sp|Q9AXT8|CMT1_MAIZE DNA (cytosine-5)-methyltransferase 1 OS=Zea mays GN=MET2A PE=1 SV=1//2.52067e-33
Dendrobium_GLEAN_10061986	955.624	121.462	2.9759	1.1887e-08	4.6247e-06	-//-
Dendrobium_GLEAN_10062370	1010.68	155.482	2.7005	1.3651e-07	3.7759e-05	sp|Q8RX80|CRK18_ARATH Cysteine-rich receptor-like protein kinase 18 OS=Arabidopsis thaliana GN=CRK18 PE=2 SV=2//1.14741e-44
Dendrobium_GLEAN_10062470	289.666	34.1553	3.0842	1.1748e-05	0.0015696	sp|Q9S7X6|ACL5_ARATH Thermospermine synthase ACAULIS5 OS=Arabidopsis thaliana GN=ACL5 PE=1 SV=1//1.62423e-115
Dendrobium_GLEAN_10062487	983.895	113.028	3.1218	3.5464e-09	1.5501e-06	-//-
Dendrobium_GLEAN_10062529	294.999	14.3062	4.366	2.8433e-06	0.000491	sp|Q9SJQ1|PXC1_ARATH Leucine-rich repeat receptor-like protein kinase PXC1 OS=Arabidopsis thaliana GN=PXC1 PE=2 SV=1//0
Dendrobium_GLEAN_10062568	26.6817	207.614	-2.96	0.00015581	0.013103	sp|A7NY33|PER4_VITVI Peroxidase 4 OS=Vitis vinifera GN=GSVIVT00023967001 PE=1 SV=1//5.41098e-135
Dendrobium_GLEAN_10062651	423.522	90.0146	2.2342	0.00013871	0.011949	sp|Q4R1I9|ANGLT_ROSHC Anthocyanidin 5,3-O-glucosyltransferase OS=Rosa hybrid cultivar GN=RhGT1 PE=2 SV=1//3.53306e-44
Dendrobium_GLEAN_10062720	772.265	98.6599	2.9686	4.925e-08	1.645e-05	sp|Q9M9C5|Y1680_ARATH Probable leucine-rich repeat receptor-like protein kinase At1g68400 OS=Arabidopsis thaliana GN=At1g68400 PE=2 SV=1//0
Dendrobium_GLEAN_10063036	1652.84	45.852	5.1718	1.6902e-05	0.0021146	sp|Q9LF24|LNG1_ARATH Protein LONGIFOLIA 1 OS=Arabidopsis thaliana GN=LNG1 PE=1 SV=1//2.45757e-10
Dendrobium_GLEAN_10063089	1059.45	310.444	1.7709	0.00029164	0.021378	-//-
Dendrobium_GLEAN_10063128	4.47766	115.987	-4.6951	0.00078829	0.046906	-//-
Dendrobium_GLEAN_10063812	978.909	3332.81	-1.7675	0.00017379	0.014145	sp|Q9LFS4|NIK1_ARATH Protein NSP-INTERACTING KINASE 1 OS=Arabidopsis thaliana GN=NIK1 PE=1 SV=1//0
Dendrobium_GLEAN_10063862	200.954	13.1548	3.9332	3.3454e-06	0.00055608	sp|Q69L19|CSLC2_ORYSJ Probable xyloglucan glycosyltransferase 2 OS=Oryza sativa subsp. japonica GN=CSLC2 PE=2 SV=2//0
Dendrobium_GLEAN_10064258	586.004	136.14	2.1058	0.00014099	0.012086	sp|Q9LSL1|BH093_ARATH Transcription factor bHLH93 OS=Arabidopsis thaliana GN=BHLH93 PE=1 SV=1//7.63747e-32
Dendrobium_GLEAN_10064417	322.753	1039.32	-1.6871	0.0003964	0.027273	sp|Q8LJW3|ACR4_ARATH ACT domain-containing protein ACR4 OS=Arabidopsis thaliana GN=ACR4 PE=2 SV=1//1.5638e-144
Dendrobium_GLEAN_10064570	339.34	27.0107	3.6511	1.926e-07	4.9774e-05	sp|Q8LFN2|Y3037_ARATH Probable inactive leucine-rich repeat receptor-like protein kinase At3g03770 OS=Arabidopsis thaliana GN=At3g03770 PE=2 SV=1//3.17394e-87
Dendrobium_GLEAN_10064954	187.377	3.34713	5.8069	9.134e-09	3.6749e-06	sp|Q75HC2|AGO7_ORYSJ Protein argonaute 7 OS=Oryza sativa subsp. japonica GN=AGO7 PE=2 SV=2//0
Dendrobium_GLEAN_10064955	79.0744	2.84323	4.7976	0.00075703	0.045583	sp|Q75HC2|AGO7_ORYSJ Protein argonaute 7 OS=Oryza sativa subsp. japonica GN=AGO7 PE=2 SV=2//3.81448e-25
Dendrobium_GLEAN_10065001	340.164	1913.16	-2.4917	9.2005e-08	2.7841e-05	sp|Q96376|LIS_CLABR S-linalool synthase OS=Clarkia breweri GN=LIS PE=2 SV=1//1.71946e-123
Dendrobium_GLEAN_10065111	396.81	17.6083	4.4941	3.1904e-05	0.0035973	sp|Q9ZWR8|ANTA_GENTR Anthocyanin 5-aromatic acyltransferase OS=Gentiana triflora PE=1 SV=1//3.62767e-61
Dendrobium_GLEAN_10065180	3085.47	784.787	1.9751	9.4081e-06	0.0013068	sp|O82337|AGP16_ARATH Arabinogalactan peptide 16 OS=Arabidopsis thaliana GN=AGP16 PE=1 SV=1//1.44365e-12
Dendrobium_GLEAN_10065288	191.301	28.8912	2.7271	0.00083252	0.048881	-//-
Dendrobium_GLEAN_10065339	32.5769	268.634	-3.0437	1.6863e-05	0.0021146	-//-
Dendrobium_GLEAN_10065442	880.33	111.333	2.9832	1.3508e-08	5.1426e-06	sp|Q8VY93|GDL66_ARATH GDSL esterase/lipase At4g26790 OS=Arabidopsis thaliana GN=At4g26790 PE=2 SV=1//4.16552e-80
Dendrobium_GLEAN_10065444	307.996	55.2118	2.4799	0.00013264	0.01151	sp|Q9SJB4|GDL34_ARATH GDSL esterase/lipase At2g04570 OS=Arabidopsis thaliana GN=At2g04570 PE=2 SV=1//2.87901e-43
Dendrobium_GLEAN_10065560	3903.89	978.63	1.9961	5.0219e-06	0.00076309	sp|Q9M3B0|PME34_ARATH Probable pectinesterase/pectinesterase inhibitor 34 OS=Arabidopsis thaliana GN=PME34 PE=2 SV=1//1.51033e-107
Dendrobium_GLEAN_10065561	6184.97	1415.56	2.1274	1.0102e-06	0.00019651	sp|Q9M3B0|PME34_ARATH Probable pectinesterase/pectinesterase inhibitor 34 OS=Arabidopsis thaliana GN=PME34 PE=2 SV=1//8.25117e-122
Dendrobium_GLEAN_10065629	117.718	4.76874	4.6256	3.2233e-05	0.0036229	-//-
Dendrobium_GLEAN_10066115	276.917	51.4849	2.4272	0.00032076	0.022953	sp|Q8L868|E1311_ARATH Glucan endo-1,3-beta-glucosidase 11 OS=Arabidopsis thaliana GN=At1g32860 PE=1 SV=1//1.32688e-81
Dendrobium_GLEAN_10066125	1520.94	349.243	2.1227	5.7382e-06	0.00085361	sp|Q9ZRA4|AB19A_PRUPE Auxin-binding protein ABP19a OS=Prunus persica GN=ABP19A PE=3 SV=1//9.60955e-28
Dendrobium_GLEAN_10066155	977.237	240.872	2.0204	3.781e-05	0.0041386	sp|O49607|SBT16_ARATH Subtilisin-like protease SBT1.6 OS=Arabidopsis thaliana GN=SBT1.6 PE=2 SV=1//0
Dendrobium_GLEAN_10066306	864.49	250.04	1.7897	0.00032396	0.023078	-//-
Dendrobium_GLEAN_10066307	844.3	178.58	2.2412	1.0803e-05	0.0014607	-//-
Dendrobium_GLEAN_10066557	1053.62	256.459	2.0385	3.816e-05	0.0041443	sp|Q8GWP0|MYB39_ARATH Transcription factor MYB39 OS=Arabidopsis thaliana GN=MYB39 PE=2 SV=1//1.40942e-65
Dendrobium_GLEAN_10066670	1996.88	494.301	2.0143	9.4123e-06	0.0013068	sp|Q66GR0|FLA17_ARATH Fasciclin-like arabinogalactan protein 17 OS=Arabidopsis thaliana GN=FLA17 PE=2 SV=1//0
Dendrobium_GLEAN_10067188	3404.98	89.8319	5.2443	7.4995e-07	0.00015001	sp|Q6GKX7|GASAC_ARATH Gibberellin-regulated protein 12 OS=Arabidopsis thaliana GN=GASA12 PE=3 SV=1//2.22283e-14
Dendrobium_GLEAN_10067202	259.439	19.6689	3.7214	1.1422e-06	0.00021625	sp|Q9C540|ACFR4_ARATH Probable transmembrane ascorbate ferrireductase 4 OS=Arabidopsis thaliana GN=CYB561D PE=2 SV=1//7.51923e-07
Dendrobium_GLEAN_10067630	780.828	29.6202	4.7203	3.8639e-08	1.3282e-05	sp|Q9C8M9|SRF6_ARATH Protein STRUBBELIG-RECEPTOR FAMILY 6 OS=Arabidopsis thaliana GN=SRF6 PE=1 SV=1//0
Dendrobium_GLEAN_10067678	1256.11	228.637	2.4578	4.1749e-07	9.3552e-05	sp|O64864|YLS3_ARATH Protein YLS3 OS=Arabidopsis thaliana GN=YLS3 PE=2 SV=1//6.41961e-38
Dendrobium_GLEAN_10067948	829.478	16.3218	5.6673	0.00046795	0.031378	sp|Q9ZQ99|U73C1_ARATH UDP-glycosyltransferase 73C1 OS=Arabidopsis thaliana GN=UGT73C1 PE=2 SV=1//7.42079e-112
Dendrobium_GLEAN_10068041	615.955	157.521	1.9673	0.00026087	0.019568	sp|O23522|PLA14_ARATH Phospholipase A1-Ibeta2, chloroplastic OS=Arabidopsis thaliana GN=At4g16820 PE=1 SV=2//1.1477e-149
Dendrobium_GLEAN_10068101	1238.43	272.696	2.1831	6.5254e-06	0.00095075	sp|Q9FKP1|CCX1_ARATH Cation/calcium exchanger 1 OS=Arabidopsis thaliana GN=CCX1 PE=2 SV=1//5.54295e-108
Dendrobium_GLEAN_10068124	2697.39	492.971	2.452	9.0204e-08	2.7532e-05	sp|Q9ZQB9|CSLCC_ARATH Probable xyloglucan glycosyltransferase 12 OS=Arabidopsis thaliana GN=CSLC12 PE=1 SV=1//0
Dendrobium_GLEAN_10068809	397.774	76.2013	2.3841	0.00029956	0.021689	sp|B3TPQ7|ATESY_MAGGA Alpha-terpineol synthase, chloroplastic OS=Magnolia grandiflora PE=1 SV=1//6.02048e-45
Dendrobium_GLEAN_10068978	1594.04	7619.85	-2.2571	1.9147e-07	4.9774e-05	sp|O24325|VPE1_PHAVU Vacuolar-processing enzyme OS=Phaseolus vulgaris PE=1 SV=1//0
Dendrobium_GLEAN_10069197	4292.36	324.958	3.7234	7.5838e-06	0.0010871	sp|Q9LHF1|LRX4_ARATH Leucine-rich repeat extensin-like protein 4 OS=Arabidopsis thaliana GN=LRX4 PE=2 SV=1//2.87935e-167
Dendrobium_GLEAN_10069328	716.288	34.0652	4.3942	4.1335e-13	4.3043e-10	-//-
Dendrobium_GLEAN_10069747	206.271	13.8924	3.8922	3.9134e-06	0.00061361	sp|Q84TG3|PUB23_ARATH E3 ubiquitin-protein ligase PUB23 OS=Arabidopsis thaliana GN=PUB23 PE=1 SV=1//8.73398e-119
Dendrobium_GLEAN_10070073	3894.74	767.535	2.3432	1.1283e-07	3.2478e-05	-//-
Dendrobium_GLEAN_10070138	1072.64	3281.28	-1.6131	0.00020598	0.016087	-//-
Dendrobium_GLEAN_10070311	118.387	1.92551	5.9421	1.6407e-06	0.00029338	sp|Q41001|BCP_PEA Blue copper protein OS=Pisum sativum PE=2 SV=1//3.4519e-38
Dendrobium_GLEAN_10070545	1441.74	275.987	2.3851	6.8285e-07	0.00014138	sp|O64592|SRO3_ARATH Probable inactive poly [ADP-ribose] polymerase SRO3 OS=Arabidopsis thaliana GN=SRO3 PE=1 SV=2//4.40384e-38
Dendrobium_GLEAN_10071010	1058.4	347.512	1.6067	0.00067893	0.042474	sp|O81905|SD18_ARATH Receptor-like serine/threonine-protein kinase SD1-8 OS=Arabidopsis thaliana GN=SD18 PE=1 SV=1//2.57907e-85
Dendrobium_GLEAN_10071025	207.02	686.331	-1.7291	0.00083808	0.04909	-//-
Dendrobium_GLEAN_10071273	269.997	50.0633	2.4311	0.00035697	0.024883	sp|Q6I544|GL52_ORYSJ Germin-like protein 5-1 OS=Oryza sativa subsp. japonica GN=Os05g0277500 PE=2 SV=1//1.42284e-108
Dendrobium_GLEAN_10071387	399.954	44.0531	3.1825	0.00020012	0.01578	sp|Q0WPE9|NAT7_ARATH Nucleobase-ascorbate transporter 7 OS=Arabidopsis thaliana GN=NAT7 PE=2 SV=2//0
Dendrobium_GLEAN_10071780	830.652	13.7123	5.9207	1.2346e-19	2.732e-16	sp|Q93YW8|GDL65_ARATH GDSL esterase/lipase At4g18970 OS=Arabidopsis thaliana GN=At4g18970 PE=2 SV=1//1.1335e-93
Dendrobium_GLEAN_10072077	1153.59	108.082	3.4159	3.1244e-06	0.00052427	sp|Q54DY9|BCS1B_DICDI Probable mitochondrial chaperone BCS1-B OS=Dictyostelium discoideum GN=bcsl1b PE=3 SV=1//8.67822e-29
Dendrobium_GLEAN_10072537	2003.86	495.203	2.0167	0.00054976	0.036031	-//-
Dendrobium_GLEAN_10073293	2003.83	676.804	1.566	0.00035414	0.02478	sp|Q9FH92|IX15L_ARATH Protein IRX15-LIKE OS=Arabidopsis thaliana GN=IRX15-L PE=2 SV=1//4.76724e-95
Dendrobium_GLEAN_10073412	524.31	99.8538	2.3925	0.00047375	0.031707	sp|P25096|P21_SOYBN Protein P21 OS=Glycine max PE=1 SV=1//1.47513e-100
Dendrobium_GLEAN_10073488	98.7967	3.89606	4.6644	0.00010185	0.0093664	sp|Q9LZC5|GDL73_ARATH GDSL esterase/lipase At5g03820 OS=Arabidopsis thaliana GN=At5g03820 PE=3 SV=1//8.25709e-19
Dendrobium_GLEAN_10073490	165.553	14.4949	3.5137	8.5954e-05	0.0081834	sp|Q9FFN0|GDL72_ARATH GDSL esterase/lipase At5g03810 OS=Arabidopsis thaliana GN=At5g03810 PE=3 SV=1//1.66326e-68
Dendrobium_GLEAN_10073961	65.9173	0.503896	7.0314	0.00033793	0.023834	sp|Q9LJZ5|UBC19_ARATH Ubiquitin-conjugating enzyme E2 19 OS=Arabidopsis thaliana GN=UBC19 PE=1 SV=1//2.05801e-84
Dendrobium_GLEAN_10074005	465.934	47.4002	3.2972	1.1571e-07	3.3037e-05	sp|Q9ZVC2|NPR5_ARATH Regulatory protein NPR5 OS=Arabidopsis thaliana GN=NPR5 PE=1 SV=1//1.60878e-119
Dendrobium_GLEAN_10074006	189.189	22.3686	3.0803	0.00014157	0.012107	sp|Q9ZVC2|NPR5_ARATH Regulatory protein NPR5 OS=Arabidopsis thaliana GN=NPR5 PE=1 SV=1//1.25475e-63
Dendrobium_GLEAN_10074616	1105.06	59.0884	4.2251	2.3067e-14	3.2667e-11	sp|Q8GU87|AB31G_ORYSJ ABC transporter G family member 31 OS=Oryza sativa subsp. japonica GN=ABCG31 PE=2 SV=3//3.0125e-07
Dendrobium_GLEAN_10074897	161.457	23.0526	2.8082	0.00075308	0.045422	sp|Q69T58|ROC8_ORYSJ Homeobox-leucine zipper protein ROC8 OS=Oryza sativa subsp. japonica GN=ROC8 PE=2 SV=2//0
Dendrobium_GLEAN_10075063	608.562	153.799	1.9844	0.00020226	0.015914	-//-
Dendrobium_GLEAN_10075183	21.2849	182.471	-3.0998	0.00018934	0.015136	sp|Q7XA42|RGA1_SOLBU Putative disease resistance protein RGA1 OS=Solanum bulbocastanum GN=RGA1 PE=2 SV=2//4.37102e-15
Dendrobium_GLEAN_10075186	7.97027	119.976	-3.912	0.0001599	0.013384	sp|Q9LRR4|R13L1_ARATH Putative disease resistance RPP13-like protein 1 OS=Arabidopsis thaliana GN=RPPL1 PE=3 SV=1//8.38251e-92
Dendrobium_GLEAN_10075632	499.205	40.9226	3.6087	7.1168e-09	2.9299e-06	sp|Q8S3D2|BH087_ARATH Transcription factor bHLH87 OS=Arabidopsis thaliana GN=BHLH87 PE=2 SV=1//7.91869e-32
Dendrobium_GLEAN_10075638	681.989	105.658	2.6903	1.1251e-06	0.00021417	sp|Q9FXI5|IQD32_ARATH Protein IQ-DOMAIN 32 OS=Arabidopsis thaliana GN=IQD32 PE=1 SV=3//2.51892e-53
Dendrobium_GLEAN_10075700	335.36	70.1545	2.2571	0.00041498	0.028255	sp|P13240|DR206_PEA Disease resistance response protein 206 OS=Pisum sativum GN=PI206 PE=1 SV=2//1.27783e-62
Dendrobium_GLEAN_10075996	990.5	13.1999	6.2296	5.8671e-21	1.3848e-17	sp|Q944R1|PLY15_ARATH Probable pectate lyase 15 OS=Arabidopsis thaliana GN=At4g13710 PE=2 SV=1//0
Dendrobium_GLEAN_10076050	98.2584	6.69425	3.8756	0.00061181	0.039528	-//-
Dendrobium_GLEAN_10076113	2199.23	717.847	1.6153	0.00035703	0.024883	sp|Q9LMM0|GPAT4_ARATH Glycerol-3-phosphate 2-O-acyltransferase 4 OS=Arabidopsis thaliana GN=GPAT4 PE=1 SV=1//0
Dendrobium_GLEAN_10076125	157.476	931.491	-2.5644	5.4545e-07	0.00011859	sp|Q2QWE3|P2C77_ORYSJ Probable protein phosphatase 2C 77 OS=Oryza sativa subsp. japonica GN=Os12g0198200 PE=3 SV=1//3.06655e-87
Dendrobium_GLEAN_10076238	1473.67	111.761	3.7209	3.3202e-05	0.0037082	sp|Q8LNZ5|XTHB_PHAAN Probable xyloglucan endotransglucosylase/hydrolase protein B OS=Phaseolus angularis GN=XTHB PE=2 SV=1//3.15306e-174
Dendrobium_GLEAN_10076418	745.702	57.7288	3.6912	4.3567e-07	9.7013e-05	sp|Q8S7W9|HOX21_ORYSJ Homeobox-leucine zipper protein HOX21 OS=Oryza sativa subsp. japonica GN=HOX21 PE=2 SV=1//5.98073e-85
Dendrobium_GLEAN_10076486	135.326	1.00779	7.0691	3.7727e-08	1.3117e-05	sp|Q94AN4|AP2L1_ARATH AP2-like ethylene-responsive transcription factor At1g16060 OS=Arabidopsis thaliana GN=At1g16060 PE=2 SV=1//1.413e-86
Dendrobium_GLEAN_10076712	924.757	4540.17	-2.2956	1.3786e-07	3.7837e-05	-//-
Dendrobium_GLEAN_10076876	310.033	54.7955	2.5003	0.0002459	0.018523	sp|Q8L868|E1311_ARATH Glucan endo-1,3-beta-glucosidase 11 OS=Arabidopsis thaliana GN=At1g32860 PE=1 SV=1//7.72606e-44
Dendrobium_GLEAN_10077013	163.965	21.5044	2.9307	0.00055528	0.036273	sp|Q9FVQ5|CSCL1_ARATH CSC1-like protein At1g32090 OS=Arabidopsis thaliana GN=At1g32090 PE=1 SV=1//0
Dendrobium_GLEAN_10077726	1574.39	4294.83	-1.4478	0.00065719	0.041747	sp|Q9FY93|NAC83_ARATH NAC domain-containing protein 83 OS=Arabidopsis thaliana GN=NAC083 PE=1 SV=1//8.16936e-49
Dendrobium_GLEAN_10078066	387.122	90.6485	2.0944	0.00069218	0.043	sp|O82797|PCNA_TOBAC Proliferating cell nuclear antigen OS=Nicotiana tabacum GN=PCNA PE=2 SV=1//1.35287e-179
Dendrobium_GLEAN_10078161	142.128	10.4102	3.7711	9.0986e-05	0.0084997	sp|Q9FHA6|RLF34_ARATH Protein RALF-like 34 OS=Arabidopsis thaliana GN=RALFL34 PE=2 SV=1//7.18623e-25
Dendrobium_GLEAN_10079435	28.4285	820.166	-4.8505	2.3415e-15	3.7683e-12	sp|O04887|PME2_CITSI Pectinesterase 2 OS=Citrus sinensis GN=PECS-2.1 PE=2 SV=1//0
Dendrobium_GLEAN_10079641	4769.71	697.964	2.7727	5.6338e-07	0.00012162	-//-
Dendrobium_GLEAN_10079875	1084.8	330.284	1.7157	0.00029367	0.021394	sp|Q9ASU1|DGAT2_ARATH Diacylglycerol O-acyltransferase 2 OS=Arabidopsis thaliana GN=DGAT2 PE=2 SV=1//5.01156e-101
Dendrobium_GLEAN_10080069	253.516	40.9396	2.6305	0.00021468	0.016595	sp|Q8LDF9|HMGB7_ARATH High mobility group B protein 7 OS=Arabidopsis thaliana GN=HMGB7 PE=1 SV=1//3.75992e-39
Dendrobium_GLEAN_10080259	98.7176	0.458859	7.7491	1.0916e-06	0.00021004	sp|Q40062|IDS3_HORVU 2&apos;-deoxymugineic-acid 2&apos;-dioxygenase OS=Hordeum vulgare GN=IDS3 PE=1 SV=3//2.17873e-72
Dendrobium_GLEAN_10080949	2945.93	79.0275	5.2202	1.9974e-23	5.8931e-20	sp|Q9SPG2|MYB28_ARATH Transcription factor MYB28 OS=Arabidopsis thaliana GN=MYB28 PE=1 SV=1//8.73439e-66
Dendrobium_GLEAN_10080980	340.575	77.119	2.1428	0.00058589	0.037992	sp|Q9LXD9|PME51_ARATH Probable pectinesterase/pectinesterase inhibitor 51 OS=Arabidopsis thaliana GN=PME51 PE=2 SV=1//0
Dendrobium_GLEAN_10081045	1329.19	76.4095	4.1206	1.0343e-05	0.0014084	sp|O65351|SBT17_ARATH Subtilisin-like protease SBT1.7 OS=Arabidopsis thaliana GN=SBT1.7 PE=1 SV=1//0
Dendrobium_GLEAN_10081641	219.416	21.1356	3.3759	1.9298e-05	0.0023319	-//-
Dendrobium_GLEAN_10081695	165.2	597.733	-1.8553	0.00062371	0.04015	-//-
Dendrobium_GLEAN_10082322	1237.36	293.587	2.0754	1.5439e-05	0.0019702	sp|O04203|HSPR2_ARATH Nematode resistance protein-like HSPRO2 OS=Arabidopsis thaliana GN=HSPRO2 PE=1 SV=1//7.38976e-122
Dendrobium_GLEAN_10082438	596.876	43.9715	3.7628	5.224e-10	2.6805e-07	sp|O65351|SBT17_ARATH Subtilisin-like protease SBT1.7 OS=Arabidopsis thaliana GN=SBT1.7 PE=1 SV=1//2.10325e-147
Dendrobium_GLEAN_10082489	131.965	862.063	-2.7076	3.6569e-07	8.353e-05	-//-
Dendrobium_GLEAN_10083398	4108.35	16.7807	7.9356	7.3422e-07	0.00014854	-//-
Dendrobium_GLEAN_10083515	78.4177	2.42941	5.0125	0.00026982	0.020099	sp|Q2MHE4|HT1_ARATH Serine/threonine-protein kinase HT1 OS=Arabidopsis thaliana GN=HT1 PE=1 SV=1//1.46144e-96
Dendrobium_GLEAN_10083834	37.6721	225.836	-2.5837	0.00069973	0.043236	sp|Q9FIZ3|GSO2_ARATH LRR receptor-like serine/threonine-protein kinase GSO2 OS=Arabidopsis thaliana GN=GSO2 PE=2 SV=2//4.62785e-08
Dendrobium_GLEAN_10083985	5649.93	1840.43	1.6182	0.00017008	0.013944	sp|Q851L8|CESA5_ORYSJ Probable cellulose synthase A catalytic subunit 5 [UDP-forming] OS=Oryza sativa subsp. japonica GN=CESA5 PE=2 SV=1//0
Dendrobium_GLEAN_10084012	213.729	33.4882	2.6741	0.00053416	0.035283	sp|O23044|PER3_ARATH Peroxidase 3 OS=Arabidopsis thaliana GN=PER3 PE=2 SV=1//1.00985e-150
Dendrobium_GLEAN_10084223	730.564	63.3982	3.5265	0.0001288	0.011232	sp|Q9SU40|SKU5_ARATH Monocopper oxidase-like protein SKU5 OS=Arabidopsis thaliana GN=SKU5 PE=1 SV=1//0
Dendrobium_GLEAN_10084357	335.781	52.1324	2.6873	4.249e-05	0.0045586	-//-
Dendrobium_GLEAN_10084397	197.436	30.5745	2.691	0.00046309	0.031141	-//-
Dendrobium_GLEAN_10084642	1114.84	333.029	1.7431	0.00036077	0.025094	sp|Q9FZ62|PPSP2_ARATH Inorganic pyrophosphatase 2 OS=Arabidopsis thaliana GN=At1g17710 PE=2 SV=1//7.70991e-100
Dendrobium_GLEAN_10084654	10644	630.987	4.0763	2.618e-11	1.8175e-08	sp|Q10RB4|BGAL5_ORYSJ Beta-galactosidase 5 OS=Oryza sativa subsp. japonica GN=Os03g0165400 PE=2 SV=1//0
Dendrobium_GLEAN_10085106	881.482	169.104	2.382	3.76e-06	0.00059696	sp|Q9LQQ4|H2B1_ARATH Histone H2B.1 OS=Arabidopsis thaliana GN=At1g07790 PE=1 SV=3//8.46345e-58
Dendrobium_GLEAN_10085264	103.484	4.03117	4.6821	6.2705e-05	0.0062714	sp|Q42381|HLS1_ARATH Probable N-acetyltransferase HLS1 OS=Arabidopsis thaliana GN=HLS1 PE=1 SV=1//6.93251e-56
Dendrobium_GLEAN_10085307	613.24	6.3705	6.5889	2.7206e-05	0.0031173	sp|O49743|GATA4_ARATH GATA transcription factor 4 OS=Arabidopsis thaliana GN=GATA4 PE=2 SV=1//1.47188e-52
Dendrobium_GLEAN_10085569	760.026	2843.24	-1.9034	0.00014386	0.012273	sp|Q9LT67|BH113_ARATH Transcription factor bHLH113 OS=Arabidopsis thaliana GN=BHLH113 PE=2 SV=1//3.52255e-24
Dendrobium_GLEAN_10085688	564.232	68.5077	3.0419	2.2305e-07	5.6814e-05	sp|Q6YWK8|CSLAB_ORYSJ Probable mannan synthase 11 OS=Oryza sativa subsp. japonica GN=CSLA11 PE=2 SV=1//2.26906e-158
Dendrobium_GLEAN_10085752	676.396	138.169	2.2914	1.7846e-05	0.0022015	sp|Q9FL51|Y5694_ARATH Probably inactive leucine-rich repeat receptor-like protein kinase At5g06940 OS=Arabidopsis thaliana GN=At5g06940 PE=3 SV=1//0
Dendrobium_GLEAN_10086059	1330.07	404.932	1.7158	0.00027078	0.020099	sp|Q6S4P4|RF2B_ORYSJ Transcription factor RF2b OS=Oryza sativa subsp. japonica GN=RF2b PE=1 SV=2//2.67458e-35
Dendrobium_GLEAN_10086266	1370.68	329.089	2.0583	2.1006e-05	0.0024873	sp|Q8H4H5|NRAM5_ORYSJ Metal transporter Nramp5 OS=Oryza sativa subsp. japonica GN=NRAMP5 PE=2 SV=1//0
Dendrobium_GLEAN_10086997	1326.35	121.026	3.4541	3.2948e-11	2.201e-08	sp|Q9FM65|FLA1_ARATH Fasciclin-like arabinogalactan protein 1 OS=Arabidopsis thaliana GN=FLA1 PE=1 SV=1//8.05211e-94
Dendrobium_GLEAN_10087458	5244.29	22408.6	-2.0952	5.9677e-07	0.00012728	sp|Q10R54|SUT1_ORYSJ Sucrose transport protein SUT1 OS=Oryza sativa subsp. japonica GN=SUT1 PE=1 SV=1//3.81974e-40
Dendrobium_GLEAN_10087553	854.828	239.118	1.8379	0.00029851	0.021657	sp|Q66GQ2|Y5162_ARATH Uncharacterized protein At5g41620 OS=Arabidopsis thaliana GN=At5g41620 PE=2 SV=2//1.66007e-22
Dendrobium_GLEAN_10087558	15894.7	799.888	4.3126	3.7095e-13	3.9799e-10	sp|Q9SB81|PER42_ARATH Peroxidase 42 OS=Arabidopsis thaliana GN=PER42 PE=1 SV=2//0
Dendrobium_GLEAN_10087645	6356.67	62.9028	6.659	4.0127e-14	4.8989e-11	sp|Q9LIS1|CR26L_ARATH Protein ECERIFERUM 26-like OS=Arabidopsis thaliana GN=CER26L PE=2 SV=1//6.33669e-21
Dendrobium_GLEAN_10087938	101.922	8.02579	3.6667	0.00084376	0.049296	sp|P42761|GSTFA_ARATH Glutathione S-transferase F10 OS=Arabidopsis thaliana GN=GSTF10 PE=1 SV=3//4.47503e-29
Dendrobium_GLEAN_10088405	5471.69	946.352	2.5315	1.3982e-08	5.2663e-06	sp|P14133|ASO_CUCSA L-ascorbate oxidase OS=Cucumis sativus PE=1 SV=1//0
Dendrobium_GLEAN_10088697	4439.46	11861.7	-1.4179	0.00055057	0.036031	-//-
Dendrobium_GLEAN_10088713	539.47	82.4282	2.7103	0.00057648	0.037519	sp|Q9FJR1|PER65_ARATH Peroxidase 65 OS=Arabidopsis thaliana GN=PER65 PE=2 SV=2//1.97854e-131
Dendrobium_GLEAN_10089527	167.562	16.0881	3.3806	0.00010637	0.0096813	sp|Q7XJ98|KATAM_ARATH Xyloglucan galactosyltransferase KATAMARI1 OS=Arabidopsis thaliana GN=KAM1 PE=1 SV=1//3.25569e-91
Dendrobium_GLEAN_10089966	1245.57	92.5061	3.7511	3.4083e-11	2.2121e-08	sp|Q42059|GUN6_ARATH Endoglucanase 6 OS=Arabidopsis thaliana GN=At1g64390 PE=2 SV=2//0
Dendrobium_GLEAN_10090162	872.966	279.956	1.6407	0.00077226	0.046174	-//-
Dendrobium_GLEAN_10090991	7123.49	653.761	3.4458	3.6456e-14	4.6098e-11	sp|Q41350|OLP1_SOLLC Osmotin-like protein OS=Solanum lycopersicum PE=1 SV=1//7.20143e-110
Dendrobium_GLEAN_10091638	1586.26	491.47	1.6905	0.00022793	0.017355	sp|O81292|LRK43_ARATH L-type lectin-domain containing receptor kinase IV.3 OS=Arabidopsis thaliana GN=LECRK43 PE=2 SV=1//1.15566e-07
Dendrobium_GLEAN_10092009	59.5354	1.00779	5.8845	0.00053259	0.035245	-//-
Dendrobium_GLEAN_10092450	10.1895	116.513	-3.5153	0.00065663	0.041747	-//-
Dendrobium_GLEAN_10092633	1529.46	396.2	1.9487	0.00018626	0.014954	sp|Q6YWF1|GAP1_ORYSJ GTPase activating protein 1 OS=Oryza sativa subsp. japonica GN=GAP1 PE=1 SV=1//8.20659e-40
Dendrobium_GLEAN_10093944	45.209	440.069	-3.283	1.9472e-07	4.9958e-05	sp|Q65XK7|P2C51_ORYSJ Probable protein phosphatase 2C 51 OS=Oryza sativa subsp. japonica GN=Os05g0572700 PE=2 SV=1//2.8703e-112
Dendrobium_GLEAN_10094218	1044.16	113.363	3.2033	0.00076829	0.046165	sp|Q9LK35|THE1_ARATH Receptor-like protein kinase THESEUS 1 OS=Arabidopsis thaliana GN=THE1 PE=1 SV=1//0
Dendrobium_GLEAN_10094286	115.01	493.505	-2.1013	0.00014048	0.012072	sp|P74516|TRML_SYNY3 Putative tRNA (cytidine(34)-2&apos;-O)-methyltransferase OS=Synechocystis sp. (strain PCC 6803 / Kazusa) GN=slr0992 PE=3 SV=1//3.50844e-24
Dendrobium_GLEAN_10094362	4296.34	1566.22	1.4558	0.00078242	0.046636	sp|P27608|AROF_TOBAC Phospho-2-dehydro-3-deoxyheptonate aldolase 1, chloroplastic OS=Nicotiana tabacum GN=DHAPS-1 PE=2 SV=1//0
Dendrobium_GLEAN_10094377	7120.49	1169.58	2.606	3.7087e-06	0.00059148	sp|Q9ZPE7|EXO_ARATH Protein EXORDIUM OS=Arabidopsis thaliana GN=EXO PE=2 SV=1//4.13538e-132
Dendrobium_GLEAN_10094381	1447.86	297.95	2.2808	1.8048e-06	0.0003211	sp|P43298|TMK1_ARATH Receptor protein kinase TMK1 OS=Arabidopsis thaliana GN=TMK1 PE=1 SV=1//0
Dendrobium_GLEAN_10094427	1318.62	28.1986	5.5473	1.1141e-07	3.2333e-05	sp|Q9SS87|SEOB_ARATH Protein SIEVE ELEMENT OCCLUSION B OS=Arabidopsis thaliana GN=SEOB PE=1 SV=1//9.16161e-102
Dendrobium_GLEAN_10094428	203.332	3.76095	5.7566	4.8593e-06	0.00074157	sp|Q9SS87|SEOB_ARATH Protein SIEVE ELEMENT OCCLUSION B OS=Arabidopsis thaliana GN=SEOB PE=1 SV=1//3.25664e-33
Dendrobium_GLEAN_10094429	188.35	1.42161	7.0497	7.8505e-06	0.0011208	sp|Q9SS87|SEOB_ARATH Protein SIEVE ELEMENT OCCLUSION B OS=Arabidopsis thaliana GN=SEOB PE=1 SV=1//8.78966e-06
Dendrobium_GLEAN_10095736	2078.75	701.417	1.5674	0.00071788	0.04405	sp|Q43867|PME1_ARATH Pectinesterase 1 OS=Arabidopsis thaliana GN=PME1 PE=1 SV=1//1.77206e-180
Dendrobium_GLEAN_10096124	196.452	1.42161	7.1105	4.8583e-05	0.005059	sp|Q9M2K4|BZP61_ARATH Basic leucine zipper 61 OS=Arabidopsis thaliana GN=BZIP61 PE=1 SV=1//1.96533e-70
Dendrobium_GLEAN_10096367	777.608	164.873	2.2377	1.7959e-05	0.0022078	sp|Q76MV0|H32_TOBAC Histone H3.2 OS=Nicotiana tabacum GN=B34 PE=1 SV=1//7.85043e-93
Dendrobium_GLEAN_10096534	103.249	0.917719	6.8139	0.00052294	0.034672	sp|O64495|SBT12_ARATH Subtilisin-like protease SBT1.2 OS=Arabidopsis thaliana GN=SBT1.2 PE=2 SV=1//7.09172e-70
Dendrobium_GLEAN_10096539	323.874	0.917719	8.4632	1.8241e-08	6.6579e-06	sp|O65351|SBT17_ARATH Subtilisin-like protease SBT1.7 OS=Arabidopsis thaliana GN=SBT1.7 PE=1 SV=1//3.45595e-166
Dendrobium_GLEAN_10096541	178.501	1.37658	7.0187	8.5747e-10	4.1026e-07	sp|O65351|SBT17_ARATH Subtilisin-like protease SBT1.7 OS=Arabidopsis thaliana GN=SBT1.7 PE=1 SV=1//4.13854e-160
Dendrobium_GLEAN_10097028	142.602	6.60418	4.4325	8.671e-05	0.0081834	sp|A7LXU3|BGH3B_BACO1 Beta-glucosidase BoGH3B OS=Bacteroides ovatus (strain ATCC 8483 / DSM 1896 / JCM 5824 / NCTC 11153) GN=BACOVA_02659 PE=1 SV=1//5.68098e-70
Dendrobium_GLEAN_10097111	1137.04	79.7625	3.8334	1.4835e-12	1.3822e-09	sp|Q766C2|NEP2_NEPGR Aspartic proteinase nepenthesin-2 OS=Nepenthes gracilis GN=nep2 PE=1 SV=1//7.8492e-43
Dendrobium_GLEAN_10097305	180.286	2.88827	5.9639	9.7121e-09	3.8235e-06	-//-
Dendrobium_GLEAN_10097527	530.555	0.917719	9.1752	1.3069e-06	0.00024225	sp|O64495|SBT12_ARATH Subtilisin-like protease SBT1.2 OS=Arabidopsis thaliana GN=SBT1.2 PE=2 SV=1//1.37905e-136
Dendrobium_GLEAN_10097553	249.851	12.3722	4.3359	0.00033418	0.023616	sp|P43309|PPO_MALDO Polyphenol oxidase, chloroplastic OS=Malus domestica PE=2 SV=1//1.05326e-142
Dendrobium_GLEAN_10097756	712.434	130.867	2.4447	0.000692	0.043	sp|Q65KJ5|FOSB_BACLD Metallothiol transferase FosB OS=Bacillus licheniformis (strain ATCC 14580 / DSM 13 / JCM 2505 / NBRC 12200 / NCIMB 9375 / NRRL NRS-1264 / Gibson 46) GN=fosB PE=3 SV=1//5.93468e-07
Dendrobium_GLEAN_10099683	186.983	10.7789	4.1166	3.8413e-06	0.00060715	sp|Q00624|ASOL_BRANA L-ascorbate oxidase homolog OS=Brassica napus GN=Bp10 PE=2 SV=1//4.36786e-159
Dendrobium_GLEAN_10100067	134.262	6.23539	4.4284	2.0525e-05	0.0024386	sp|Q949Z1|PGLR4_ARATH Polygalacturonase At1g48100 OS=Arabidopsis thaliana GN=At1g48100 PE=2 SV=1//0
Dendrobium_GLEAN_10100257	2294.48	599.451	1.9365	1.7367e-05	0.0021499	sp|Q8GZ17|COBL7_ARATH COBRA-like protein 7 OS=Arabidopsis thaliana GN=COBL7 PE=1 SV=2//0
Dendrobium_GLEAN_10100317	1335.37	111.007	3.5885	4.3567e-12	3.6726e-09	sp|Q9LXD9|PME51_ARATH Probable pectinesterase/pectinesterase inhibitor 51 OS=Arabidopsis thaliana GN=PME51 PE=2 SV=1//7.66309e-93
Dendrobium_GLEAN_10101282	1000.56	277.29	1.8513	0.00014827	0.012589	-//-
Dendrobium_GLEAN_10101415	1194.08	226.369	2.3992	8.7139e-05	0.0081834	sp|Q0WVN5|CSLG3_ARATH Cellulose synthase-like protein G3 OS=Arabidopsis thaliana GN=CSLG3 PE=2 SV=2//0
Dendrobium_GLEAN_10102127	12.7238	323.996	-4.6704	1.0027e-09	4.7333e-07	sp|Q9LZK5|DNJ19_ARATH DnaJ protein ERDJ3B OS=Arabidopsis thaliana GN=ERDJ3B PE=1 SV=1//3.37502e-37
Dendrobium_GLEAN_10102159	5857.52	2081.25	1.4928	0.00039059	0.026957	-//-
Dendrobium_GLEAN_10102219	1522.06	133.291	3.5134	6.5847e-07	0.00013714	-//-
Dendrobium_GLEAN_10102322	2571.67	699.433	1.8784	2.0319e-05	0.0024222	sp|F4IIU4|AIR9_ARATH 187-kDa microtubule-associated protein AIR9 OS=Arabidopsis thaliana GN=AIR9 PE=1 SV=1//9.23161e-13
Dendrobium_GLEAN_10102342	813.087	249.911	1.702	0.000669	0.042146	sp|Q9SJG2|Y2296_ARATH Probable receptor-like protein kinase At2g42960 OS=Arabidopsis thaliana GN=At2g42960 PE=3 SV=1//1.7895e-162
Dendrobium_GLEAN_10102858	283.006	8.43112	5.069	5.6969e-06	0.00085105	sp|Q93WI9|HD3A_ORYSJ Protein HEADING DATE 3A OS=Oryza sativa subsp. japonica GN=HD3A PE=1 SV=1//8.89644e-101
Dendrobium_GLEAN_10103309	124.925	0	Inf	0.00033202	0.023571	sp|Q9SU35|ERLL1_ARATH pEARLI1-like lipid transfer protein 1 OS=Arabidopsis thaliana GN=AZI1 PE=1 SV=1//3.41006e-15
Dendrobium_GLEAN_10103799	1534.98	19.3987	6.3061	8.7596e-26	3.8766e-22	sp|Q40161|GP1_SOLLC Polygalacturonase-1 non-catalytic subunit beta OS=Solanum lycopersicum GN=GP1 PE=1 SV=1//0
Dendrobium_GLEAN_10104392	426.399	5.59639	6.2516	5.0462e-12	4.1549e-09	sp|O65351|SBT17_ARATH Subtilisin-like protease SBT1.7 OS=Arabidopsis thaliana GN=SBT1.7 PE=1 SV=1//8.41666e-134
Dendrobium_GLEAN_10104394	501.234	7.79211	6.0073	0.00031326	0.022543	sp|O65351|SBT17_ARATH Subtilisin-like protease SBT1.7 OS=Arabidopsis thaliana GN=SBT1.7 PE=1 SV=1//3.69367e-141
Dendrobium_GLEAN_10104418	1968.65	91.732	4.4236	6.576e-12	4.9537e-09	sp|Q94CD1|HHT1_ARATH Omega-hydroxypalmitate O-feruloyl transferase OS=Arabidopsis thaliana GN=HHT1 PE=1 SV=1//1.42531e-58
Dendrobium_GLEAN_10104449	1261.71	127.424	3.3077	2.488e-06	0.00043608	sp|Q6ZA27|BURPC_ORYSJ BURP domain-containing protein 12 OS=Oryza sativa subsp. japonica GN=BURP12 PE=2 SV=1//0
Dendrobium_GLEAN_10104452	1972.83	60.4624	5.0281	1.8539e-12	1.683e-09	sp|Q6ZA27|BURPC_ORYSJ BURP domain-containing protein 12 OS=Oryza sativa subsp. japonica GN=BURP12 PE=2 SV=1//0
Dendrobium_GLEAN_10104861	170.951	19.9306	3.1005	0.00019188	0.015266	sp|Q852A1|EXPA7_ORYSJ Expansin-A7 OS=Oryza sativa subsp. japonica GN=EXPA7 PE=2 SV=1//1.35809e-55
Dendrobium_GLEAN_10104862	205.327	17.9601	3.5151	1.2915e-05	0.0016935	sp|Q38865|EXPA6_ARATH Expansin-A6 OS=Arabidopsis thaliana GN=EXPA6 PE=2 SV=2//8.60696e-83
Dendrobium_GLEAN_10105031	151.266	16.4119	3.2043	0.00037063	0.025679	sp|Q41238|LOX16_SOLTU Linoleate 9S-lipoxygenase 6 (Fragment) OS=Solanum tuberosum GN=LOX1.6 PE=1 SV=1//5.554e-156
Dendrobium_GLEAN_10106086	688.606	32.8238	4.3909	6.8362e-13	6.7232e-10	sp|Q69RG7|4CLL7_ORYSJ 4-coumarate--CoA ligase-like 7 OS=Oryza sativa subsp. japonica GN=4CLL7 PE=2 SV=1//1.22567e-40
Dendrobium_GLEAN_10106090	1106.61	259.522	2.0922	1.9021e-05	0.0023142	sp|Q7F1X5|4CLL5_ORYSJ 4-coumarate--CoA ligase-like 5 OS=Oryza sativa subsp. japonica GN=4CLL5 PE=2 SV=1//4.24605e-62
Dendrobium_GLEAN_10106476	3788.71	833.655	2.1842	2.2928e-05	0.0026791	sp|Q7XLR1|PIP26_ORYSJ Probable aquaporin PIP2-6 OS=Oryza sativa subsp. japonica GN=PIP2-6 PE=2 SV=2//3.0066e-168
Dendrobium_GLEAN_10108174	231.497	5.55135	5.382	2.8671e-09	1.3183e-06	sp|Q9CAU1|SCP3_ARATH Serine carboxypeptidase-like 3 OS=Arabidopsis thaliana GN=SCPL3 PE=2 SV=1//1.40657e-48
Dendrobium_GLEAN_10108256	8459.54	2496.99	1.7604	7.1708e-05	0.0069748	sp|B2KNH9|LEC_DENFN Mannose-specific lectin OS=Dendrobium findlayanum GN=dfa PE=1 SV=1//3.35407e-21
Dendrobium_GLEAN_10109120	7.16941	177.507	-4.6299	9.5873e-07	0.00018754	sp|O04017|NAC98_ARATH Protein CUP-SHAPED COTYLEDON 2 OS=Arabidopsis thaliana GN=NAC098 PE=1 SV=1//2.87869e-43
Dendrobium_GLEAN_10109269	2935	7730.18	-1.3971	0.00069273	0.043	sp|Q9SI09|XERIC_ARATH Probable E3 ubiquitin-protein ligase XERICO OS=Arabidopsis thaliana GN=XERICO PE=1 SV=1//3.61128e-28
Dendrobium_GLEAN_10109276	3624.29	495.651	2.8703	3.8279e-10	2.0534e-07	sp|Q9M0B6|GAE1_ARATH UDP-glucuronate 4-epimerase 1 OS=Arabidopsis thaliana GN=GAE1 PE=1 SV=1//0
Dendrobium_GLEAN_10109493	1322.61	256.383	2.367	1.1124e-06	0.00021289	sp|Q7DM58|AB4C_ARATH ABC transporter C family member 4 OS=Arabidopsis thaliana GN=ABCC4 PE=2 SV=2//0
Dendrobium_GLEAN_10109500	2018.18	556.14	1.8595	4.5448e-05	0.004789	sp|Q9LZJ5|AB14C_ARATH ABC transporter C family member 14 OS=Arabidopsis thaliana GN=ABCC14 PE=1 SV=1//5.29548e-09
Dendrobium_GLEAN_10109697	1536.12	406.632	1.9175	3.809e-05	0.0041443	sp|F4I8B9|Y1501_ARATH Putative WEB family protein At1g65010, chloroplastic OS=Arabidopsis thaliana GN=At1g65010 PE=1 SV=1//1.00994e-79
Dendrobium_GLEAN_10110319	8440.13	2272.8	1.8928	0.00022072	0.016952	sp|Q9LSQ6|PBP1_ARATH Calcium-binding protein PBP1 OS=Arabidopsis thaliana GN=PBP1 PE=1 SV=1//1.42234e-23
Dendrobium_GLEAN_10110605	683.433	86.8732	2.9758	9.7001e-08	2.886e-05	sp|Q9FWQ2|TPP2_ORYSJ Probable trehalose-phosphate phosphatase 2 OS=Oryza sativa subsp. japonica GN=TPP2 PE=1 SV=1//1.2259e-140
Dendrobium_GLEAN_10110943	9670.41	2960.12	1.7079	5.4054e-05	0.0055633	sp|Q9MA41|CTL1_ARATH Chitinase-like protein 1 OS=Arabidopsis thaliana GN=CTL1 PE=1 SV=1//1.01672e-154
Dendrobium_GLEAN_10110994	86.6113	0.503896	7.4253	5.261e-06	0.000796	sp|Q94CD8|E134_ARATH Glucan endo-1,3-beta-glucosidase 4 OS=Arabidopsis thaliana GN=At3g13560 PE=1 SV=1//9.87158e-22
Dendrobium_GLEAN_10111633	126.396	517.836	-2.0345	0.00022653	0.017323	sp|Q9SHI2|Y1723_ARATH Leucine-rich repeat receptor-like serine/threonine-protein kinase At1g17230 OS=Arabidopsis thaliana GN=At1g17230 PE=2 SV=2//8.00385e-13
Dendrobium_GLEAN_10111674	550.419	28.649	4.264	2.0436e-11	1.5073e-08	sp|Q84MA9|Y1063_ARATH Inactive leucine-rich repeat receptor-like serine/threonine-protein kinase At1g60630 OS=Arabidopsis thaliana GN=At1g60630 PE=2 SV=1//7.93384e-79
Dendrobium_GLEAN_10111677	188.244	17.8785	3.3963	4.4706e-05	0.004739	sp|Q93Y06|Y5720_ARATH Probable inactive receptor kinase At5g67200 OS=Arabidopsis thaliana GN=At5g67200 PE=1 SV=1//1.13931e-61
Dendrobium_GLEAN_10111756	112.438	0.458859	7.9369	0.00016383	0.013648	sp|Q8LB81|GDL79_ARATH GDSL esterase/lipase At5g33370 OS=Arabidopsis thaliana GN=At5g33370 PE=2 SV=1//2.61115e-81
Dendrobium_GLEAN_10111757	59.6395	0.458859	7.0221	0.00077336	0.046174	sp|Q8LB81|GDL79_ARATH GDSL esterase/lipase At5g33370 OS=Arabidopsis thaliana GN=At5g33370 PE=2 SV=1//2.91168e-51
Dendrobium_GLEAN_10111854	1354	355.133	1.9308	0.00016749	0.013855	sp|Q38826|IAA8_ARATH Auxin-responsive protein IAA8 OS=Arabidopsis thaliana GN=IAA8 PE=1 SV=1//1.19447e-78
Dendrobium_GLEAN_10112586	1021.46	222.419	2.1993	0.00020411	0.015988	sp|Q9MAH1|TTL1_ARATH TPR repeat-containing thioredoxin TTL1 OS=Arabidopsis thaliana GN=TTL1 PE=1 SV=1//0
Dendrobium_GLEAN_10112742	390.407	89.8234	2.1198	0.00041325	0.028191	-//-
Dendrobium_GLEAN_10113186	97.3125	0.503896	7.5934	1.3171e-06	0.00024288	-//-
Dendrobium_GLEAN_10113497	473.349	27.461	4.1074	0.00065913	0.041747	sp|Q8RYJ8|CML19_ORYSJ Putative calcium-binding protein CML19 OS=Oryza sativa subsp. japonica GN=CML19 PE=3 SV=1//2.11463e-28
Dendrobium_GLEAN_10113500	243.195	43.0368	2.4985	0.00042665	0.028938	-//-
Dendrobium_GLEAN_10113507	492.81	54.9025	3.1661	3.0977e-07	7.4608e-05	sp|Q8RYK0|CML31_ORYSJ Probable calcium-binding protein CML31 OS=Oryza sativa subsp. japonica GN=CML31 PE=2 SV=1//1.77975e-30
Dendrobium_GLEAN_10113714	4057.32	456.715	3.1512	5.8706e-07	0.00012597	sp|Q9LLY4|LPAT1_BRANA 1-acyl-sn-glycerol-3-phosphate acyltransferase 1, chloroplastic OS=Brassica napus GN=LPAT1 PE=2 SV=1//9.52495e-81
Dendrobium_GLEAN_10113839	962.201	243.656	1.9815	6.8362e-05	0.0067045	sp|Q0WR59|Y5020_ARATH Probable inactive receptor kinase At5g10020 OS=Arabidopsis thaliana GN=At5g10020 PE=1 SV=2//0
Dendrobium_GLEAN_10113992	513.849	86.4228	2.5719	8.8228e-06	0.0012445	sp|Q9C9N5|Y1668_ARATH Probable inactive leucine-rich repeat receptor-like protein kinase At1g66830 OS=Arabidopsis thaliana GN=At1g66830 PE=2 SV=1//2.43973e-61
Dendrobium_GLEAN_10113993	1019.73	200.991	2.343	2.9228e-06	0.00049991	sp|Q9C9N5|Y1668_ARATH Probable inactive leucine-rich repeat receptor-like protein kinase At1g66830 OS=Arabidopsis thaliana GN=At1g66830 PE=2 SV=1//4.00163e-143
Dendrobium_GLEAN_10114051	1079.96	47.0569	4.5204	2.9563e-14	4.0257e-11	sp|O81416|GUN17_ARATH Endoglucanase 17 OS=Arabidopsis thaliana GN=At4g02290 PE=2 SV=1//0
Dendrobium_GLEAN_10114842	2209.36	434.836	2.3451	2.9088e-07	7.2411e-05	sp|Q8H273|DRE1E_ORYSJ Dehydration-responsive element-binding protein 1E OS=Oryza sativa subsp. japonica GN=DREB1E PE=2 SV=1//5.36958e-32
Dendrobium_GLEAN_10114908	1134.63	145.511	2.963	0.00012174	0.010773	sp|P85076|PME_ACTDE Pectinesterase OS=Actinidia deliciosa PE=1 SV=1//3.85883e-167
Dendrobium_GLEAN_10115189	192.614	1.92551	6.6443	7.8746e-05	0.0075968	sp|D5JBW9|GAO_SAUCO Germacrene A oxidase OS=Saussurea costus PE=1 SV=1//2.06892e-72
Dendrobium_GLEAN_10115429	339.669	16.2768	4.3832	2.4569e-09	1.1446e-06	sp|Q9MAH8|TCP3_ARATH Transcription factor TCP3 OS=Arabidopsis thaliana GN=TCP3 PE=2 SV=1//1.06106e-06
Dendrobium_GLEAN_10115708	1939.14	521.558	1.8945	0.00018348	0.014764	sp|Q9ZQB9|CSLCC_ARATH Probable xyloglucan glycosyltransferase 12 OS=Arabidopsis thaliana GN=CSLC12 PE=1 SV=1//0
Dendrobium_GLEAN_10115731	49401.6	12701.3	1.9596	9.0455e-06	0.0012658	sp|Q41607|SUS2_TULGE Sucrose synthase 2 OS=Tulipa gesneriana PE=2 SV=1//0
Dendrobium_GLEAN_10115751	11288.4	193.438	5.8668	1.3889e-30	1.2294e-26	sp|P83948|PME3_CITSI Pectinesterase 3 OS=Citrus sinensis PE=1 SV=1//0
Dendrobium_GLEAN_10115878	145.044	2.2943	5.9823	0.00017438	0.01416	-//-
Dendrobium_GLEAN_10116065	1769.12	214.66	3.0429	3.0681e-06	0.00051727	-//-
Dendrobium_GLEAN_10116331	1969.58	461.16	2.0945	5.3011e-06	0.00079866	sp|O64733|U87A2_ARATH UDP-glycosyltransferase 87A2 OS=Arabidopsis thaliana GN=UGT87A2 PE=1 SV=1//5.65226e-37
Dendrobium_GLEAN_10116701	912.661	151.108	2.5945	6.9938e-07	0.00014396	sp|A7LXU3|BGH3B_BACO1 Beta-glucosidase BoGH3B OS=Bacteroides ovatus (strain ATCC 8483 / DSM 1896 / JCM 5824 / NCTC 11153) GN=BACOVA_02659 PE=1 SV=1//2.61994e-67
Dendrobium_GLEAN_10117171	1944.51	5.77653	8.395	1.4435e-05	0.0018652	sp|Q9LZR3|CSLA9_ARATH Glucomannan 4-beta-mannosyltransferase 9 OS=Arabidopsis thaliana GN=CSLA9 PE=2 SV=1//5.38751e-69
Dendrobium_GLEAN_10117358	362.726	24.5277	3.8864	2.3798e-08	8.5109e-06	sp|P12459|TBB1_SOYBN Tubulin beta-1 chain OS=Glycine max GN=TUBB1 PE=3 SV=1//1.71431e-86
Dendrobium_GLEAN_10117360	1388.21	64.7298	4.4226	2.8904e-16	4.8731e-13	sp|P18025|TBB1_MAIZE Tubulin beta-1 chain OS=Zea mays GN=TUBB1 PE=2 SV=1//0
Dendrobium_GLEAN_10117797	1942.46	112.4	4.1112	0.0003513	0.024649	sp|Q949Z1|PGLR4_ARATH Polygalacturonase At1g48100 OS=Arabidopsis thaliana GN=At1g48100 PE=2 SV=1//2.63788e-108
Dendrobium_GLEAN_10118671	2499.39	733.343	1.769	0.00020629	0.016087	sp|Q9M1S8|GCP2_ARATH Probable glutamate carboxypeptidase 2 OS=Arabidopsis thaliana GN=AMP1 PE=1 SV=3//5.89043e-169
Dendrobium_GLEAN_10119431	276.468	881.189	-1.6723	0.00064832	0.041461	-//-
Dendrobium_GLEAN_10119478	171.751	15.0353	3.5139	5.5676e-05	0.0056644	-//-
Dendrobium_GLEAN_10120987	758.133	12.5158	5.9206	4.3904e-19	8.1812e-16	sp|Q6ZA27|BURPC_ORYSJ BURP domain-containing protein 12 OS=Oryza sativa subsp. japonica GN=BURP12 PE=2 SV=1//1.63454e-09
Dendrobium_GLEAN_10121183	598.79	148.959	2.0071	0.00018062	0.014567	sp|Q9SCV8|BGAL4_ARATH Beta-galactosidase 4 OS=Arabidopsis thaliana GN=BGAL4 PE=1 SV=1//0
Dendrobium_GLEAN_10121996	216.002	11.3729	4.2474	6.2837e-07	0.00013243	sp|Q0IU52|ASP1_ORYSJ Aspartic proteinase Asp1 OS=Oryza sativa subsp. japonica GN=ASP1 PE=2 SV=1//2.34898e-101
Dendrobium_GLEAN_10122093	310.163	23.582	3.7173	3.5435e-07	8.2292e-05	sp|Q87AW7|PBPA_XYLFT Penicillin-binding protein 1A OS=Xylella fastidiosa (strain Temecula1 / ATCC 700964) GN=mrcA PE=3 SV=1//3.2843e-17
Dendrobium_GLEAN_10122143	128.552	0	Inf	0.00010271	0.0093964	sp|O64495|SBT12_ARATH Subtilisin-like protease SBT1.2 OS=Arabidopsis thaliana GN=SBT1.2 PE=2 SV=1//5.69317e-170
Dendrobium_GLEAN_10122680	2674.92	38.0344	6.1361	1.3511e-28	9.5668e-25	sp|P17407|21KD_DAUCA 21 kDa protein OS=Daucus carota PE=2 SV=1//3.44048e-08
Dendrobium_GLEAN_10122788	818.124	30.6195	4.7398	3.9229e-09	1.6734e-06	sp|O65857|GSTF1_ORYSJ Probable glutathione S-transferase GSTF1 OS=Oryza sativa subsp. japonica GN=GSTF1 PE=1 SV=2//4.82128e-76
Dendrobium_GLEAN_10123619	978.886	283.847	1.786	0.00032252	0.023022	sp|Q9LS40|ASPG1_ARATH Protein ASPARTIC PROTEASE IN GUARD CELL 1 OS=Arabidopsis thaliana GN=ASPG1 PE=1 SV=1//1.1333e-33
Dendrobium_GLEAN_10124101	994.57	310.119	1.6812	0.00042965	0.029085	sp|P93176|TBB_HORVU Tubulin beta chain OS=Hordeum vulgare GN=TUBB PE=2 SV=1//4.42284e-150
Dendrobium_GLEAN_10124142	50.6851	257.188	-2.3432	0.00071971	0.044085	sp|Q8RUN2|LOG1_ARATH Cytokinin riboside 5&apos;-monophosphate phosphoribohydrolase LOG1 OS=Arabidopsis thaliana GN=LOG1 PE=1 SV=1//8.67572e-67
Dendrobium_GLEAN_10124147	776.714	2227.9	-1.5202	0.00069739	0.043166	-//-
Dendrobium_GLEAN_10124524	643.292	133.15	2.2724	2.3061e-05	0.0026858	sp|Q8GT41|PLA1_PLAAC Putative invertase inhibitor OS=Platanus acerifolia PE=1 SV=1//2.58942e-14
Dendrobium_GLEAN_10124565	1335.58	3626.24	-1.441	0.00067707	0.042474	sp|Q2MHE4|HT1_ARATH Serine/threonine-protein kinase HT1 OS=Arabidopsis thaliana GN=HT1 PE=1 SV=1//7.20373e-31
Dendrobium_GLEAN_10125129	1310.76	444.874	1.5589	0.00079596	0.047283	sp|Q9LSE2|ICE1_ARATH Transcription factor ICE1 OS=Arabidopsis thaliana GN=SCRM PE=1 SV=1//2.05779e-106
Dendrobium_GLEAN_10125209	2038.53	256.653	2.9896	3.6876e-10	2.0086e-07	sp|Q9XIA9|LACS2_ARATH Long chain acyl-CoA synthetase 2 OS=Arabidopsis thaliana GN=LACS2 PE=2 SV=1//1.84455e-90
Dendrobium_GLEAN_10125412	1603.96	282.515	2.5052	1.1967e-07	3.3896e-05	sp|Q8H930|ARAE1_ORYSJ Probable UDP-arabinose 4-epimerase 1 OS=Oryza sativa subsp. japonica GN=UEL-1 PE=2 SV=2//0
Dendrobium_GLEAN_10125887	235.121	777.444	-1.7253	0.00081479	0.048079	sp|O81025|P2A03_ARATH Putative protein PHLOEM PROTEIN 2-LIKE A3 OS=Arabidopsis thaliana GN=PP2A3 PE=3 SV=1//1.35504e-43
Dendrobium_GLEAN_10126655	708.526	174.4	2.0224	0.00012719	0.011147	-//-
Dendrobium_GLEAN_10126792	954.35	204.811	2.2202	1.1598e-05	0.0015613	sp|Q6S4P4|RF2B_ORYSJ Transcription factor RF2b OS=Oryza sativa subsp. japonica GN=RF2b PE=1 SV=2//1.79439e-80
Dendrobium_GLEAN_10126988	823.859	39.3209	4.389	0.00011053	0.0099706	-//-
Dendrobium_GLEAN_10127101	15610.4	390.777	5.32	2.7164e-05	0.0031173	sp|Q9LZR3|CSLA9_ARATH Glucomannan 4-beta-mannosyltransferase 9 OS=Arabidopsis thaliana GN=CSLA9 PE=2 SV=1//0
Dendrobium_GLEAN_10127818	1747.42	388.892	2.1678	4.3372e-06	0.00066765	sp|Q9XIP8|CDI_ARATH Protein CDI OS=Arabidopsis thaliana GN=CDI PE=2 SV=1//4.95358e-126
Dendrobium_GLEAN_10127837	422.364	88.2863	2.2582	0.00014734	0.01254	sp|Q9SUC9|UGPI7_ARATH Uncharacterized GPI-anchored protein At4g28100 OS=Arabidopsis thaliana GN=At4g28100 PE=1 SV=1//1.95607e-33
Dendrobium_GLEAN_10129149	38.9989	813.026	-4.3818	0.00018939	0.015136	sp|B1B1U3|ZSS1_ZINZE Alpha-humulene synthase OS=Zingiber zerumbet GN=ZSS1 PE=1 SV=1//3.58983e-24
Dendrobium_GLEAN_10130004	388.712	34.7663	3.4829	1.8913e-07	4.96e-05	sp|Q9C9N5|Y1668_ARATH Probable inactive leucine-rich repeat receptor-like protein kinase At1g66830 OS=Arabidopsis thaliana GN=At1g66830 PE=2 SV=1//1.46706e-11
Dendrobium_GLEAN_10130253	26.9834	2135.57	-6.3064	3.8501e-28	2.2719e-24	sp|Q9FMY1|C86B1_ARATH Cytochrome P450 86B1 OS=Arabidopsis thaliana GN=CYP86B1 PE=2 SV=1//0
Dendrobium_GLEAN_10130643	13973.7	5322.31	1.3926	0.0006184	0.039881	sp|Q570B4|KCS10_ARATH 3-ketoacyl-CoA synthase 10 OS=Arabidopsis thaliana GN=FDH PE=1 SV=2//0
Dendrobium_GLEAN_10130895	23953.7	2554.14	3.2293	2.3949e-13	2.7352e-10	sp|Q6ZA27|BURPC_ORYSJ BURP domain-containing protein 12 OS=Oryza sativa subsp. japonica GN=BURP12 PE=2 SV=1//0
Dendrobium_GLEAN_10131100	582.167	28.1085	4.3724	6.4763e-12	4.9537e-09	-//-
Dendrobium_GLEAN_10131119	2376.01	797.285	1.5754	0.00041058	0.028063	-//-
Dendrobium_GLEAN_10131614	2003.23	5719.6	-1.5136	0.00039672	0.027273	-//-
Dendrobium_GLEAN_10131672	3372.22	398.088	3.0825	2.3742e-11	1.6917e-08	sp|B8XCH5|QKY_ARATH Protein QUIRKY OS=Arabidopsis thaliana GN=QKY PE=2 SV=1//1.64905e-27
Dendrobium_GLEAN_10132268	357.447	11.8683	4.9125	5.2161e-11	3.1841e-08	sp|Q9XI33|WIN1_ARATH Ethylene-responsive transcription factor WIN1 OS=Arabidopsis thaliana GN=WIN1 PE=2 SV=1//1.72217e-53
Dendrobium_GLEAN_10132690	169.126	21.1806	2.9973	0.0003464	0.024382	-//-
Dendrobium_GLEAN_10132762	147.878	537.57	-1.862	0.000679	0.042474	sp|Q2HIV9|BH035_ARATH Transcription factor bHLH35 OS=Arabidopsis thaliana GN=BHLH35 PE=2 SV=1//9.72996e-51
Dendrobium_GLEAN_10133146	13411.9	308.123	5.4439	1.1055e-25	4.3488e-22	sp|Q9FF86|DCR_ARATH BAHD acyltransferase DCR OS=Arabidopsis thaliana GN=DCR PE=2 SV=1//6.15e-138
Dendrobium_GLEAN_10133317	362.109	53.2838	2.7647	1.8172e-05	0.0022262	sp|Q7XNX6|SUS7_ORYSJ Sucrose synthase 7 OS=Oryza sativa subsp. japonica GN=SUS7 PE=2 SV=2//0
Dendrobium_GLEAN_10133340	135.419	9.8077	3.7874	9.6447e-05	0.008939	sp|Q5ZAY9|CKX5_ORYSJ Cytokinin dehydrogenase 5 OS=Oryza sativa subsp. japonica GN=CKX5 PE=2 SV=1//0
Dendrobium_GLEAN_10135067	17236.8	4444.46	1.9554	3.9526e-06	0.00061648	sp|Q9SII5|EXOL5_ARATH Protein EXORDIUM-like 5 OS=Arabidopsis thaliana GN=EXL5 PE=2 SV=1//2.30534e-120
Dendrobium_GLEAN_10135241	137.651	1.88047	6.1938	6.9782e-05	0.006825	-//-
Dendrobium_GLEAN_10135255	76.1193	0.917719	6.3741	6.195e-05	0.0062134	sp|Q93Z08|E136_ARATH Glucan endo-1,3-beta-glucosidase 6 OS=Arabidopsis thaliana GN=At5g58090 PE=1 SV=2//0
Dendrobium_GLEAN_10135306	9543.12	249.953	5.2547	3.2166e-06	0.00053719	sp|Q9LZ31|C77A4_ARATH Cytochrome P450 77A4 OS=Arabidopsis thaliana GN=CYP77A4 PE=2 SV=1//0
Dendrobium_GLEAN_10136152	544.366	88.5115	2.6206	4.0225e-06	0.00062464	sp|P0CG89|H4_SOYBN Histone H4 OS=Glycine max PE=3 SV=1//3.58019e-51
Dendrobium_GLEAN_10136440	801.524	23.2863	5.1052	1.547e-05	0.0019702	sp|Q9SS87|SEOB_ARATH Protein SIEVE ELEMENT OCCLUSION B OS=Arabidopsis thaliana GN=SEOB PE=1 SV=1//1.36256e-168
Dendrobium_GLEAN_10136521	2055.9	433.538	2.2455	3.7559e-05	0.0041298	sp|Q42371|ERECT_ARATH LRR receptor-like serine/threonine-protein kinase ERECTA OS=Arabidopsis thaliana GN=ERECTA PE=1 SV=1//7.18087e-36
Dendrobium_GLEAN_10136530	274.002	45.5282	2.5894	0.00016461	0.013649	-//-
Dendrobium_GLEAN_10136748	588.668	90.3749	2.7035	1.4892e-06	0.00026764	sp|P54769|TYDC2_PAPSO Tyrosine/DOPA decarboxylase 2 OS=Papaver somniferum GN=TYDC2 PE=2 SV=1//0
Dendrobium_GLEAN_10136980	1013.82	95.2397	3.4121	2.2211e-10	1.2482e-07	sp|Q9XGY7|FAR_SIMCH Alcohol-forming fatty acyl-CoA reductase OS=Simmondsia chinensis PE=1 SV=1//1.58753e-130
Dendrobium_GLEAN_10137115	4604.91	1001.15	2.2015	6.5638e-07	0.00013714	sp|Q8GU87|AB31G_ORYSJ ABC transporter G family member 31 OS=Oryza sativa subsp. japonica GN=ABCG31 PE=2 SV=3//6.06453e-31
Dendrobium_GLEAN_10138041	1500.46	355.274	2.0784	9.5883e-06	0.0013261	sp|Q9LEY1|SCP35_ARATH Serine carboxypeptidase-like 35 OS=Arabidopsis thaliana GN=SCPL35 PE=2 SV=1//0
Dendrobium_GLEAN_10138351	341.56	52.1689	2.7109	2.7987e-05	0.0031964	sp|Q9SAH3|Y1887_ARATH Putative receptor-like protein kinase At1g80870 OS=Arabidopsis thaliana GN=At1g80870 PE=3 SV=1//4.23861e-139
Dendrobium_GLEAN_10138752	967.911	109.537	3.1435	3.5204e-09	1.5501e-06	sp|P81392|MYB06_ANTMA Myb-related protein 306 OS=Antirrhinum majus GN=MYB306 PE=2 SV=1//2.54151e-101
Dendrobium_GLEAN_10140696	4706.84	1537.34	1.6143	0.00016901	0.013928	sp|P23444|H1_MAIZE Histone H1 OS=Zea mays PE=2 SV=2//8.78604e-23
Dendrobium_GLEAN_10140901	2152.78	697.419	1.6261	0.00035158	0.024649	sp|Q41140|PFPA_RICCO Pyrophosphate--fructose 6-phosphate 1-phosphotransferase subunit alpha OS=Ricinus communis GN=PFP-ALPHA PE=3 SV=1//5.27552e-55
Dendrobium_GLEAN_10143474	1193.71	233.66	2.353	4.2576e-06	0.00065825	sp|Q2HXL0|RBOHC_SOLTU Respiratory burst oxidase homolog protein C OS=Solanum tuberosum GN=RBOHC PE=1 SV=2//0
Dendrobium_GLEAN_10144924	592.357	28.1	4.3978	3.555e-12	3.0698e-09	sp|Q9FVS9|C96AF_ARATH Alkane hydroxylase MAH1 OS=Arabidopsis thaliana GN=CYP96A15 PE=2 SV=1//6.1145e-29
Dendrobium_GLEAN_10144925	1993.6	131.726	3.9198	9.2431e-15	1.3635e-11	sp|Q9FVS9|C96AF_ARATH Alkane hydroxylase MAH1 OS=Arabidopsis thaliana GN=CYP96A15 PE=2 SV=1//1.81595e-91
Dendrobium_GLEAN_10144973	567.725	160.752	1.8204	0.00072837	0.044309	-//-
Dendrobium_GLEAN_10145875	616.359	2115.95	-1.7795	8.1865e-05	0.0078548	sp|Q9ZQ96|U73C3_ARATH UDP-glycosyltransferase 73C3 OS=Arabidopsis thaliana GN=UGT73C3 PE=2 SV=1//1.79388e-143
Novel00053	480.209	82.8054	2.5359	1.8383e-05	0.0022443	-//-
Novel00479	2886.91	575.7	2.3261	2.8067e-07	7.0475e-05	-//-
Novel00773	1009.07	270.363	1.9001	0.00010066	0.009281	--	unnamed protein product [Coffea canephora]
Novel00786	8469.1	263.675	5.0054	0.00027886	0.020655	--	hypothetical protein F775_29216 [Aegilops tauschii]
Novel01397	14737.1	360.729	5.3524	3.0471e-13	3.3713e-10	-//-
Novel01603	447.787	103.231	2.1169	0.00024936	0.018744	--	RecName: Full=Beta-galactosidase; Short=Lactase; Flags: Precursor [Asparagus officinalis]>gi|452712|emb|CAA54525.1| beta-galactosidase [Asparagus officinalis]
Novel01694	57.9728	0.917719	5.9812	0.00066046	0.041756	-//-
Novel01832	678.407	92.0617	2.8815	6.8336e-05	0.0067045	-//-
Novel01912	622.021	4.39995	7.1433	4.3566e-21	1.1018e-17	--	PREDICTED: uncharacterized protein LOC103976040 [Musa acuminata subsp. malaccensis]
Novel02061	413.527	7.93572	5.7035	1.3625e-13	1.608e-10	-//-
Novel02082	113.03	7.5219	3.9095	0.00029065	0.021378	--	PREDICTED: uncharacterized protein LOC103700039 [Phoenix dactylifera]
Novel02296	421.935	1513.25	-1.8426	0.00080574	0.047705	-//-
Novel02349	133.382	854.887	-2.6802	3.6309e-07	8.3474e-05	-//-
Novel02616	7.44526	242.493	-5.0255	0.00070115	0.043248	-//-
Novel03047	1540.62	101.39	3.9255	5.4597e-08	1.7898e-05	-//-
Novel03634	462.681	1993.17	-2.107	0.0003209	0.022953	--	PREDICTED: uncharacterized protein At2g23090-like [Setaria italica]
Novel03641	1133.67	227.883	2.3146	3.4504e-06	0.00056738	--	PREDICTED: CSC1-like protein HYP1 [Musa acuminata subsp. malaccensis]
Novel03728	242.868	23.4469	3.3727	1.2379e-05	0.0016353	--	PREDICTED: uncharacterized protein LOC105049841 [Elaeis guineensis]
Novel04202	0.485851	281.912	-9.1805	1.4469e-06	0.00026136	-//-
Novel04675	548.556	77.5753	2.822	0.00021896	0.01689	--	PREDICTED: putative ribonuclease H protein At1g65750 [Phoenix dactylifera]
Novel04731	834.968	30.1972	4.7892	6.4241e-05	0.0063889	-//-
Novel05044	206.535	8.43112	4.6145	1.5147e-07	4.0627e-05	-//-
Novel05166	145.683	570.472	-1.9693	0.00070848	0.043624	-//-
Novel05219	52.9693	426.391	-3.0089	1.3612e-06	0.00024971	-//-
Novel05225	567.014	141.829	1.9992	0.00028039	0.020682	--	hypothetical protein SORBIDRAFT_03g026630 [Sorghum bicolor]>gi|241930054|gb|EES03199.1| hypothetical protein SORBIDRAFT_03g026630 [Sorghum bicolor]
Novel05351	271.284	9.86123	4.7819	1.7156e-05	0.0021388	--	PREDICTED: homeobox protein ATH1-like [Phoenix dactylifera]
Novel05381	255.841	43.918	2.5424	0.00027949	0.020658	--	PREDICTED: alpha-L-fucosidase 2-like [Musa acuminata subsp. malaccensis]
Novel05444	11949.9	2443.7	2.2899	1.28e-05	0.0016846	-//-
Novel05634	148.629	0	Inf	0.00029338	0.021394	-//-
Os08t0240500-00-D6	435.667	63.7645	2.7724	8.4651e-06	0.0011988	sp|Q38907|XTH25_ARATH Probable xyloglucan endotransglucosylase/hydrolase protein 25 OS=Arabidopsis thaliana GN=XTH25 PE=2 SV=2//1.17163e-71
PEQU_02602-D2	2158.6	283.262	2.9299	4.6001e-07	0.00010116	-//-
PEQU_13318-D2	50.3176	0	Inf	0.00026757	0.019986	sp|Q6K3R9|BZP19_ORYSJ Basic leucine zipper 19 OS=Oryza sativa subsp. japonica GN=BZIP19 PE=2 SV=1//1.03417e-56
PEQU_31991-D37	33.5095	279.145	-3.0584	1.5118e-05	0.0019393	sp|P43293|NAK_ARATH Probable serine/threonine-protein kinase NAK OS=Arabidopsis thaliana GN=NAK PE=1 SV=2//1.22981e-50
PEQU_34021-D2	6898.94	100.025	6.1079	5.1856e-05	0.0053527	-//-
PEQU_41640-D1	90.7731	1.46665	5.9517	2.1182e-05	0.0024999	sp|Q94G86|ALL9_OLEEU Glucan endo-1,3-beta-D-glucosidase OS=Olea europaea GN=OLE9 PE=1 SV=1//6.02955e-27

## Sheet: S1 vs S4
Gene_id	readcount_S1	readcount_S4	log2FoldChange	pval	padj	Blast swiss prot
Dendrobium_GLEAN_10000429	1105.46	5.29738	7.7051	0.00022157	0.023773	sp|Q9LQC9|CSLA3_ARATH Probable mannan synthase 3 OS=Arabidopsis thaliana GN=CSLA3 PE=2 SV=1//3.03136e-23
Dendrobium_GLEAN_10000689	159.759	0.416973	8.5817	6.2738e-06	0.0015102	-//-
Dendrobium_GLEAN_10000837	136.775	885.38	-2.6945	4.0746e-05	0.0066564	sp|Q8LC69|ATL8_ARATH RING-H2 finger protein ATL8 OS=Arabidopsis thaliana GN=ATL8 PE=2 SV=2//3.13818e-40
Dendrobium_GLEAN_10000861	111.321	621.51	-2.4811	0.00025556	0.02586	sp|Q9LTC0|Y5707_ARATH Probable receptor-like protein kinase At5g47070 OS=Arabidopsis thaliana GN=At5g47070 PE=1 SV=1//2.68659e-10
Dendrobium_GLEAN_10001091	1635.36	134.514	3.6038	4.2632e-08	2.4663e-05	-//-
Dendrobium_GLEAN_10002128	626.697	79.9302	2.971	5.6487e-05	0.0083375	sp|Q9SS03|DIR21_ARATH Dirigent protein 21 OS=Arabidopsis thaliana GN=DIR21 PE=3 SV=1//3.57741e-59
Dendrobium_GLEAN_10002438	9.31749	226.763	-4.6051	6.1013e-06	0.0014786	sp|Q39134|AAP3_ARATH Amino acid permease 3 OS=Arabidopsis thaliana GN=AAP3 PE=1 SV=2//2.34993e-21
Dendrobium_GLEAN_10002743	2290.64	457.783	2.323	8.2591e-05	0.011294	sp|Q8LEA8|EID1_ARATH Phytochrome A-associated F-box protein OS=Arabidopsis thaliana GN=EID1 PE=1 SV=2//1.80998e-122
Dendrobium_GLEAN_10002848	31.8458	668.255	-4.3912	9.8451e-09	7.6764e-06	sp|Q9FN04|AAP4_ARATH Amino acid permease 4 OS=Arabidopsis thaliana GN=AAP4 PE=1 SV=1//3.19072e-20
Dendrobium_GLEAN_10003066	12363	1055.21	3.5504	9.3117e-09	7.4219e-06	sp|Q8LB81|GDL79_ARATH GDSL esterase/lipase At5g33370 OS=Arabidopsis thaliana GN=At5g33370 PE=2 SV=1//0
Dendrobium_GLEAN_10003320	288.182	1279.25	-2.1502	0.00034339	0.03199	sp|Q9LFP7|Y5158_ARATH Probable receptor-like protein kinase At5g15080 OS=Arabidopsis thaliana GN=At5g15080 PE=2 SV=1//3.91286e-20
Dendrobium_GLEAN_10003360	160.203	1.69146	6.5655	1.1535e-06	0.00035975	sp|P82192|RK5_SPIOL 50S ribosomal protein L5, chloroplastic OS=Spinacia oleracea GN=RPL5 PE=1 SV=2//1.35793e-56
Dendrobium_GLEAN_10003370	4840.98	1028.62	2.2346	0.00012664	0.015503	sp|F4I8B9|Y1501_ARATH Putative WEB family protein At1g65010, chloroplastic OS=Arabidopsis thaliana GN=At1g65010 PE=1 SV=1//3.96956e-99
Dendrobium_GLEAN_10004525	1354.02	297.533	2.1861	0.00030533	0.029598	sp|Q9LRQ8|PMAT2_ARATH Phenolic glucoside malonyltransferase 2 OS=Arabidopsis thaliana GN=PMAT2 PE=1 SV=1//2.21307e-38
Dendrobium_GLEAN_10006127	5.07805	119.505	-4.5566	0.00048756	0.041146	sp|Q0WVV6|CB60D_ARATH Calmodulin-binding protein 60 D OS=Arabidopsis thaliana GN=CBP60D PE=2 SV=1//1.83828e-18
Dendrobium_GLEAN_10006805	588.397	3084.39	-2.3901	3.7438e-05	0.0063339	sp|Q9LIG0|Y3136_ARATH Clavaminate synthase-like protein At3g21360 OS=Arabidopsis thaliana GN=At3g21360 PE=1 SV=1//1.02041e-55
Dendrobium_GLEAN_10007231	26.2842	404.629	-3.9443	2.3724e-05	0.0043125	sp|P51419|RL273_ARATH 60S ribosomal protein L27-3 OS=Arabidopsis thaliana GN=RPL27C PE=2 SV=2//1.65317e-76
Dendrobium_GLEAN_10007641	115.302	1076.82	-3.2233	0.00033169	0.031389	sp|Q9LIG0|Y3136_ARATH Clavaminate synthase-like protein At3g21360 OS=Arabidopsis thaliana GN=At3g21360 PE=1 SV=1//5.59028e-93
Dendrobium_GLEAN_10008681	496.264	91.6019	2.4377	0.0004992	0.041639	sp|Q66PF2|URT1_FRAAN Putative UDP-rhamnose:rhamnosyltransferase 1 OS=Fragaria ananassa GN=GT4 PE=2 SV=1//1.42866e-134
Dendrobium_GLEAN_10009352	851.776	129.251	2.7203	0.00044771	0.038694	-//-
Dendrobium_GLEAN_10009705	141.143	1195.64	-3.0826	2.3637e-06	0.00065215	sp|C0SVV6|CB60A_ARATH Calmodulin-binding protein 60 A OS=Arabidopsis thaliana GN=CBP60A PE=2 SV=1//5.23346e-39
Dendrobium_GLEAN_10010491	211.094	1404.44	-2.734	1.1043e-05	0.0022907	sp|Q96303|PHT14_ARATH Inorganic phosphate transporter 1-4 OS=Arabidopsis thaliana GN=PHT1-4 PE=1 SV=1//0
Dendrobium_GLEAN_10010495	170.197	835.3	-2.2951	0.00041367	0.036455	sp|Q9LIG0|Y3136_ARATH Clavaminate synthase-like protein At3g21360 OS=Arabidopsis thaliana GN=At3g21360 PE=1 SV=1//1.2327e-39
Dendrobium_GLEAN_10010728	10.0455	149.92	-3.8996	0.00053341	0.04368	sp|Q9FIW5|NAC94_ARATH Putative NAC domain-containing protein 94 OS=Arabidopsis thaliana GN=ANAC094 PE=3 SV=1//1.99543e-58
Dendrobium_GLEAN_10010784	9.26217	178.332	-4.2671	6.051e-05	0.0087867	sp|Q10717|CYSP2_MAIZE Cysteine proteinase 2 OS=Zea mays GN=CCP2 PE=2 SV=1//1.96172e-179
Dendrobium_GLEAN_10011954	43.233	390.768	-3.1761	5.1865e-05	0.0078162	-//-
Dendrobium_GLEAN_10012506	1690.7	227.956	2.8908	0.00026776	0.026751	-//-
Dendrobium_GLEAN_10012764	548.169	3.50621	7.2886	2.9902e-14	1.3406e-10	sp|Q94DH3|PCL1_ORYSJ Transcription factor PCL1 OS=Oryza sativa subsp. japonica GN=PCL1 PE=2 SV=1//1.56112e-13
Dendrobium_GLEAN_10013144	0	62.5297	#NAME?	0.00036172	0.033351	sp|P47732|VF193_IIV6 Apoptosis inhibitor 193R OS=Invertebrate iridescent virus 6 GN=IIV6-193R PE=3 SV=2//3.52582e-06
Dendrobium_GLEAN_10013411	527.985	2819.66	-2.417	2.9442e-05	0.0052278	sp|Q9LZX1|LOR15_ARATH Protein LURP-one-related 15 OS=Arabidopsis thaliana GN=At5g01750 PE=1 SV=1//7.46028e-36
Dendrobium_GLEAN_10014058	0	360.528	#NAME?	1.329e-13	5.2964e-10	sp|Q9SD39|PMTR_ARATH Probable methyltransferase PMT27 OS=Arabidopsis thaliana GN=At3g51070 PE=3 SV=1//3.73945e-64
Dendrobium_GLEAN_10014417	117.261	0.416973	8.1356	2.1746e-05	0.0040204	sp|O82088|SELFP_SOLLC Protein SELF-PRUNING OS=Solanum lycopersicum GN=SP PE=2 SV=1//2.61291e-42
Dendrobium_GLEAN_10015522	282.205	30.0457	3.2315	0.00043464	0.037746	sp|Q9LK73|U88A1_ARATH UDP-glycosyltransferase 88A1 OS=Arabidopsis thaliana GN=UGT88A1 PE=2 SV=1//6.80722e-34
Dendrobium_GLEAN_10016263	2.06441	88.1591	-5.4163	0.00052775	0.043615	sp|Q8GYD7|AT18C_ARATH Autophagy-related protein 18c OS=Arabidopsis thaliana GN=ATG18C PE=2 SV=1//3.98324e-161
Dendrobium_GLEAN_10016474	805.049	97.6842	3.0429	1.6068e-05	0.0030984	sp|Q9C7F8|AB13B_ARATH ABC transporter B family member 13 OS=Arabidopsis thaliana GN=ABCB13 PE=3 SV=1//5.70559e-106
Dendrobium_GLEAN_10016498	166.81	4111.74	-4.6235	2.0824e-07	9.221e-05	sp|Q9M153|GDL61_ARATH GDSL esterase/lipase At4g01130 OS=Arabidopsis thaliana GN=At4g01130 PE=2 SV=1//1.50672e-22
Dendrobium_GLEAN_10016598	223.618	14.9349	3.9043	9.6027e-05	0.01257	sp|I1S2N3|GAOA_GIBZE Galactose oxidase OS=Gibberella zeae (strain PH-1 / ATCC MYA-4620 / FGSC 9075 / NRRL 31084) GN=GAOA PE=3 SV=1//4.71931e-11
Dendrobium_GLEAN_10016623	84.1429	0	Inf	5.7406e-05	0.0084384	-//-
Dendrobium_GLEAN_10016786	436.98	12234.6	-4.8073	0.00032919	0.031236	sp|P31673|HS174_ORYSJ 17.4 kDa class I heat shock protein OS=Oryza sativa subsp. japonica GN=HSP17.4 PE=2 SV=2//4.99198e-50
Dendrobium_GLEAN_10017815	3943.01	290.843	3.761	4.0734e-09	3.8448e-06	sp|Q9LMM1|C86A4_ARATH Cytochrome P450 86A4 OS=Arabidopsis thaliana GN=CYP86A4 PE=1 SV=1//1.35197e-111
Dendrobium_GLEAN_10018529	376.75	48.0934	2.9697	0.00027509	0.027331	sp|Q8LPH6|MYB86_ARATH Transcription factor MYB86 OS=Arabidopsis thaliana GN=MYB86 PE=2 SV=1//1.63363e-78
Dendrobium_GLEAN_10018662	32.8182	327.901	-3.3207	6.9665e-05	0.0098373	-//-
Dendrobium_GLEAN_10018898	1639.35	201.014	3.0278	2.0055e-06	0.00058481	sp|P92973|CCA1_ARATH Protein CCA1 OS=Arabidopsis thaliana GN=CCA1 PE=1 SV=1//2.66155e-15
Dendrobium_GLEAN_10019497	185.324	6.67157	4.7959	0.00057849	0.045991	sp|Q5JMF2|ABIL5_ORYSJ Probable protein ABIL5 OS=Oryza sativa subsp. japonica GN=Os01g0760900 PE=2 SV=1//5.50287e-08
Dendrobium_GLEAN_10020246	3405.29	461.35	2.8838	3.9379e-06	0.0010161	sp|Q93XX5|Y5713_ARATH PI-PLC X domain-containing protein At5g67130 OS=Arabidopsis thaliana GN=At5g67130 PE=1 SV=1//4.71807e-58
Dendrobium_GLEAN_10020962	801.611	83.2895	3.2667	3.8249e-05	0.0064107	sp|O64640|CXE8_ARATH Probable carboxylesterase 8 OS=Arabidopsis thaliana GN=CXE8 PE=2 SV=1//7.12265e-34
Dendrobium_GLEAN_10021215	2288.53	446.613	2.3573	0.00013698	0.016598	sp|Q8L9T5|ATL2_ARATH RING-H2 finger protein ATL2 OS=Arabidopsis thaliana GN=ATL2 PE=2 SV=2//6.67953e-30
Dendrobium_GLEAN_10021221	2508.53	336.101	2.8999	1.4149e-06	0.00043749	-//-
Dendrobium_GLEAN_10021536	340.195	36.8061	3.2083	0.00010332	0.013378	sp|Q9FU27|C3H2_ORYSJ Zinc finger CCCH domain-containing protein 2 OS=Oryza sativa subsp. japonica GN=Os01g0192000 PE=2 SV=1//1.25333e-114
Dendrobium_GLEAN_10022055	3251.72	694.337	2.2275	0.00023436	0.024446	sp|Q9SUC9|UGPI7_ARATH Uncharacterized GPI-anchored protein At4g28100 OS=Arabidopsis thaliana GN=At4g28100 PE=1 SV=1//2.51131e-35
Dendrobium_GLEAN_10022279	182.28	12.6035	3.8543	0.00024742	0.025428	sp|O48711|PME12_ARATH Probable pectinesterase/pectinesterase inhibitor 12 OS=Arabidopsis thaliana GN=PME12 PE=2 SV=1//2.56561e-109
Dendrobium_GLEAN_10022551	2283.48	9782.4	-2.099	0.00017927	0.020348	sp|Q9FYC2|PAO_ARATH Pheophorbide a oxygenase, chloroplastic OS=Arabidopsis thaliana GN=PAO PE=1 SV=1//0
Dendrobium_GLEAN_10022578	14.6721	508.351	-5.1147	1.0194e-09	1.175e-06	sp|Q8S340|PPA22_ARATH Purple acid phosphatase 22 OS=Arabidopsis thaliana GN=PAP22 PE=2 SV=1//4.39618e-163
Dendrobium_GLEAN_10023082	86.9942	561.872	-2.6913	0.0001958	0.021742	sp|P93002|NPR1_ARATH Regulatory protein NPR1 OS=Arabidopsis thaliana GN=NPR1 PE=1 SV=1//2.59224e-61
Dendrobium_GLEAN_10023202	3294.98	538.5	2.6133	9.7201e-06	0.0021002	sp|Q682S0|RPT2_ARATH Root phototropism protein 2 OS=Arabidopsis thaliana GN=RPT2 PE=1 SV=2//6.3448e-54
Dendrobium_GLEAN_10023203	9829.58	1686.3	2.5433	6.3886e-06	0.0015276	sp|Q682S0|RPT2_ARATH Root phototropism protein 2 OS=Arabidopsis thaliana GN=RPT2 PE=1 SV=2//1.17067e-138
Dendrobium_GLEAN_10023511	71.5441	793.242	-3.4709	1.0381e-05	0.0021951	sp|Q1EPG7|CSPL1_MUSAC CASP-like protein 1E1 OS=Musa acuminata GN=MA4_106O17.50 PE=2 SV=1//2.59461e-33
Dendrobium_GLEAN_10023953	1982.1	169.891	3.5443	3.0492e-07	0.00012702	sp|Q8H1D6|RBK1_ARATH Receptor-like cytosolic serine/threonine-protein kinase RBK1 OS=Arabidopsis thaliana GN=RBK1 PE=1 SV=1//1.26638e-76
Dendrobium_GLEAN_10024322	114.929	9828.43	-6.4181	8.3092e-18	5.9605e-14	sp|P31673|HS174_ORYSJ 17.4 kDa class I heat shock protein OS=Oryza sativa subsp. japonica GN=HSP17.4 PE=2 SV=2//1.57424e-58
Dendrobium_GLEAN_10024449	481.134	22.5873	4.4129	0.00013987	0.016835	sp|O65351|SBT17_ARATH Subtilisin-like protease SBT1.7 OS=Arabidopsis thaliana GN=SBT1.7 PE=1 SV=1//5.40129e-54
Dendrobium_GLEAN_10024984	3132.19	561.952	2.4787	0.00026603	0.026709	sp|Q9ZPE7|EXO_ARATH Protein EXORDIUM OS=Arabidopsis thaliana GN=EXO PE=2 SV=1//3.6232e-93
Dendrobium_GLEAN_10025098	765.561	43.8475	4.126	0.00025224	0.025702	-//-
Dendrobium_GLEAN_10025765	2072.27	494.806	2.0663	0.00042919	0.037454	-//-
Dendrobium_GLEAN_10025888	375.852	52.1924	2.8483	0.00057457	0.045898	sp|Q8L7Q7|PME64_ARATH Probable pectinesterase/pectinesterase inhibitor 64 OS=Arabidopsis thaliana GN=PME64 PE=2 SV=2//2.51562e-23
Dendrobium_GLEAN_10026141	658.976	2993.23	-2.1834	0.00016947	0.019422	sp|O04249|STP7_ARATH Sugar transport protein 7 OS=Arabidopsis thaliana GN=STP7 PE=2 SV=1//0
Dendrobium_GLEAN_10026202	1114.26	174.121	2.6779	5.6197e-05	0.008329	sp|O24312|TCMO_POPTM Trans-cinnamate 4-monooxygenase OS=Populus tremuloides GN=CYP73A13 PE=2 SV=1//2.1209e-169
Dendrobium_GLEAN_10026322	323.441	39.2136	3.0441	0.00034083	0.031834	sp|Q84TG3|PUB23_ARATH E3 ubiquitin-protein ligase PUB23 OS=Arabidopsis thaliana GN=PUB23 PE=1 SV=1//1.42024e-49
Dendrobium_GLEAN_10026400	32.1366	363.695	-3.5004	1.3419e-05	0.0026301	sp|P27933|AMY3D_ORYSJ Alpha-amylase isozyme 3D OS=Oryza sativa subsp. japonica GN=AMY1.3 PE=2 SV=2//0
Dendrobium_GLEAN_10027016	472.371	8.95043	5.7218	1.8633e-10	3.1824e-07	sp|F4KGY6|RVE1_ARATH Protein REVEILLE 1 OS=Arabidopsis thaliana GN=RVE1 PE=2 SV=1//1.7919e-33
Dendrobium_GLEAN_10027148	85.4222	527.12	-2.6254	0.00033427	0.031496	sp|Q9S850|SUOX_ARATH Sulfite oxidase OS=Arabidopsis thaliana GN=SOX PE=1 SV=1//1.59922e-67
Dendrobium_GLEAN_10027773	252.438	2294.9	-3.1844	1.364e-07	6.7017e-05	sp|Q88FY2|6HN3M_PSEPK 6-hydroxynicotinate 3-monooxygenase OS=Pseudomonas putida (strain KT2440) GN=nicC PE=1 SV=1//4.67816e-14
Dendrobium_GLEAN_10027775	31.1178	547.72	-4.1376	1.0094e-07	5.0282e-05	-//-
Dendrobium_GLEAN_10028088	463.114	60.8328	2.9284	7.973e-05	0.011041	sp|Q8L586|Y4958_ARATH Uncharacterized membrane protein At4g09580 OS=Arabidopsis thaliana GN=At4g09580 PE=1 SV=1//3.99301e-08
Dendrobium_GLEAN_10028373	313.198	2597.47	-3.052	5.5886e-07	0.00020664	-//-
Dendrobium_GLEAN_10028541	13139.9	152.873	6.4255	0.00016857	0.019422	sp|Q67VS7|CSLA9_ORYSJ Probable mannan synthase 9 OS=Oryza sativa subsp. japonica GN=CSLA9 PE=2 SV=1//0
Dendrobium_GLEAN_10028714	18347.3	4194.94	2.1288	0.00014635	0.017497	sp|Q5EFU4|CRD1_HORVU Magnesium-protoporphyrin IX monomethyl ester [oxidative] cyclase, chloroplastic OS=Hordeum vulgare GN=CRD1 PE=1 SV=1//0
Dendrobium_GLEAN_10028867	0	136.548	#NAME?	1.8221e-07	8.4876e-05	-//-
Dendrobium_GLEAN_10029072	199.541	6.2546	4.9956	1.1049e-05	0.0022907	sp|Q6Z2T3|NIP21_ORYSJ Aquaporin NIP2-1 OS=Oryza sativa subsp. japonica GN=NIP2-1 PE=1 SV=1//1.50075e-74
Dendrobium_GLEAN_10029817	499.931	8.43375	5.8894	2.1966e-11	4.9242e-08	sp|F4KGY6|RVE1_ARATH Protein REVEILLE 1 OS=Arabidopsis thaliana GN=RVE1 PE=2 SV=1//2.96476e-14
Dendrobium_GLEAN_10030043	653.307	18.5172	5.1408	1.5409e-08	1.0837e-05	-//-
Dendrobium_GLEAN_10030178	128.937	0.563821	7.8372	1.6164e-06	0.00048314	sp|P40781|CYPR4_CYNCA Protein CYPRO4 OS=Cynara cardunculus GN=CYPRO4 PE=2 SV=1//0
Dendrobium_GLEAN_10030912	2.90302	239.892	-6.3687	9.4914e-05	0.012516	sp|Q9F131|3HBH1_PSEAC 3-hydroxybenzoate 6-hydroxylase 1 OS=Pseudomonas alcaligenes GN=xlnD PE=1 SV=1//2.29034e-10
Dendrobium_GLEAN_10031139	599.531	3838.47	-2.6786	5.7999e-06	0.0014248	sp|O49434|AAH_ARATH Allantoate deiminase OS=Arabidopsis thaliana GN=AAH PE=1 SV=2//0
Dendrobium_GLEAN_10031548	48.0059	329.639	-2.7796	0.00060246	0.047491	sp|Q9C9W9|ADO3_ARATH Adagio protein 3 OS=Arabidopsis thaliana GN=ADO3 PE=1 SV=1//7.23207e-13
Dendrobium_GLEAN_10031549	170.625	1384.78	-3.0208	1.7377e-06	0.00051086	sp|Q2R2W1|ADO3_ORYSJ Adagio-like protein 3 OS=Oryza sativa subsp. japonica GN=Os11g0547000 PE=2 SV=2//2.09309e-08
Dendrobium_GLEAN_10031738	91.6225	709.274	-2.9526	1.5152e-05	0.0029375	sp|Q9STN5|Y4833_ARATH Uncharacterized protein At4g08330, chloroplastic OS=Arabidopsis thaliana GN=At4g08330 PE=1 SV=1//5.82965e-33
Dendrobium_GLEAN_10032180	37.5876	2178.74	-5.8571	2.2431e-06	0.00062854	sp|P09886|HS21C_PEA Small heat shock protein, chloroplastic OS=Pisum sativum GN=HSP21 PE=2 SV=1//1.41176e-32
Dendrobium_GLEAN_10032612	287.631	24.5724	3.5491	0.00016813	0.019422	sp|Q8GWW4|GUX2_ARATH UDP-glucuronate:xylan alpha-glucuronosyltransferase 2 OS=Arabidopsis thaliana GN=GUX2 PE=2 SV=1//9.58052e-171
Dendrobium_GLEAN_10032788	5518.15	542.185	3.3473	3.2381e-08	1.9918e-05	sp|Q9M3B0|PME34_ARATH Probable pectinesterase/pectinesterase inhibitor 34 OS=Arabidopsis thaliana GN=PME34 PE=2 SV=1//7.95064e-47
Dendrobium_GLEAN_10032995	45.5829	950.562	-4.3822	8.5765e-06	0.0019226	sp|Q84KJ6|AMT31_ORYSJ Ammonium transporter 3 member 1 OS=Oryza sativa subsp. japonica GN=AMT3-1 PE=2 SV=1//7.49746e-121
Dendrobium_GLEAN_10032996	22.4872	582.626	-4.6954	6.6756e-05	0.0095773	sp|Q851M9|AMT32_ORYSJ Ammonium transporter 3 member 2 OS=Oryza sativa subsp. japonica GN=AMT3-2 PE=2 SV=1//4.04016e-121
Dendrobium_GLEAN_10033206	738.207	69.3192	3.4127	3.0077e-05	0.0052881	sp|B3H5A8|RVE7_ARATH Protein REVEILLE 7 OS=Arabidopsis thaliana GN=RVE7 PE=2 SV=1//1.46483e-36
Dendrobium_GLEAN_10033268	633.996	21.2131	4.9014	2.7749e-07	0.00011709	sp|Q9SZ06|EF109_ARATH Ethylene-responsive transcription factor ERF109 OS=Arabidopsis thaliana GN=ERF109 PE=1 SV=1//3.17903e-23
Dendrobium_GLEAN_10033828	560.571	68.6719	3.0291	0.00027173	0.027072	-//-
Dendrobium_GLEAN_10034039	496.946	3602.26	-2.8577	7.9442e-07	0.00026881	sp|H2DH17|C7A22_PANGI Cytochrome P450 CYP749A22 OS=Panax ginseng PE=2 SV=1//4.38528e-149
Dendrobium_GLEAN_10034327	576.874	95.7516	2.5909	0.00056307	0.045158	sp|Q9CAD0|EGL1_ARATH Transcription factor EGL1 OS=Arabidopsis thaliana GN=BHLH2 PE=1 SV=1//8.55571e-49
Dendrobium_GLEAN_10034355	2053.97	37.9156	5.7595	1.3818e-15	8.2603e-12	-//-
Dendrobium_GLEAN_10035158	10345	913.244	3.5018	0.00021083	0.022846	sp|Q9S746|HTH_ARATH Protein HOTHEAD OS=Arabidopsis thaliana GN=HTH PE=1 SV=1//2.3664e-122
Dendrobium_GLEAN_10035159	2510.48	165.105	3.9265	0.00055755	0.045141	sp|Q9S746|HTH_ARATH Protein HOTHEAD OS=Arabidopsis thaliana GN=HTH PE=1 SV=1//5.57039e-68
Dendrobium_GLEAN_10035474	7798.91	1810.48	2.1069	0.00019949	0.021949	sp|Q38910|XTH23_ARATH Probable xyloglucan endotransglucosylase/hydrolase protein 23 OS=Arabidopsis thaliana GN=XTH23 PE=2 SV=1//3.65566e-138
Dendrobium_GLEAN_10035871	853.603	125.98	2.7604	6.1086e-05	0.0088346	sp|Q8W3M4|Y4744_ARATH Uncharacterized protein At4g06744 OS=Arabidopsis thaliana GN=At4g06744 PE=2 SV=1//1.8259e-96
Dendrobium_GLEAN_10035909	5.66329	343.066	-5.9207	1.7046e-09	1.7541e-06	sp|Q9LSM5|ECD_ARATH Protein ecdysoneless homolog OS=Arabidopsis thaliana GN=At5g65490 PE=1 SV=1//0
Dendrobium_GLEAN_10035920	974.743	167.23	2.5432	0.00025551	0.02586	sp|P24465|C71A1_PERAE Cytochrome P450 71A1 OS=Persea americana GN=CYP71A1 PE=1 SV=2//2.66171e-137
Dendrobium_GLEAN_10036187	5788.24	1001.76	2.5306	1.0389e-05	0.0021951	sp|Q60E70|COBL3_ORYSJ COBRA-like protein 3 OS=Oryza sativa subsp. japonica GN=BC1L4 PE=2 SV=1//0
Dendrobium_GLEAN_10036506	1242.23	3.33579	8.5407	3.7772e-05	0.0063604	sp|Q9SV72|EPFL9_ARATH EPIDERMAL PATTERNING FACTOR-like protein 9 OS=Arabidopsis thaliana GN=EPFL9 PE=1 SV=1//6.51493e-24
Dendrobium_GLEAN_10037407	176.358	865.128	-2.2944	0.00035871	0.033189	-//-
Dendrobium_GLEAN_10037864	147.834	0	Inf	5.8399e-08	3.1736e-05	-//-
Dendrobium_GLEAN_10038144	5645.34	1429.52	1.9815	0.00036354	0.033434	sp|Q9XED8|ARFI_ARATH Auxin response factor 9 OS=Arabidopsis thaliana GN=ARF9 PE=1 SV=1//0
Dendrobium_GLEAN_10038322	969.328	139.77	2.7939	4.34e-05	0.0070118	sp|Q6RVV4|TIC32_PEA Short-chain dehydrogenase TIC 32, chloroplastic OS=Pisum sativum GN=TIC32 PE=1 SV=1//8.83081e-122
Dendrobium_GLEAN_10038443	698.385	132.476	2.3983	0.00053636	0.043722	sp|Q8GX77|FB316_ARATH F-box protein At1g61340 OS=Arabidopsis thaliana GN=At1g61340 PE=2 SV=1//1.20693e-11
Dendrobium_GLEAN_10038455	2244.21	314.006	2.8373	7.6926e-06	0.0017463	sp|Q56X72|RTNLS_ARATH Reticulon-like protein B21 OS=Arabidopsis thaliana GN=RTNLB21 PE=2 SV=2//7.35648e-33
Dendrobium_GLEAN_10038620	2116.3	374.856	2.4971	1.1718e-05	0.0023745	sp|G1DGI7|TPS7_SELML (13E)-labda-7,13-dien-15-ol synthase OS=Selaginella moellendorffii GN=SELMODRAFT_120716 PE=1 SV=2//7.71273e-32
Dendrobium_GLEAN_10038951	767.364	120.021	2.6766	5.3718e-05	0.0080279	sp|Q9LJR3|SPA3_ARATH Protein SPA1-RELATED 3 OS=Arabidopsis thaliana GN=SPA3 PE=1 SV=1//1.25529e-162
Dendrobium_GLEAN_10039171	121.416	6.17847	4.2966	0.00056405	0.045158	sp|P14533|CABO_DORPE Squidulin OS=Doryteuthis pealeii PE=1 SV=1//2.13039e-14
Dendrobium_GLEAN_10039783	1.05986	80.2602	-6.2427	0.00037336	0.033832	sp|Q9LX85|ZAT8_ARATH Zinc finger protein ZAT8 OS=Arabidopsis thaliana GN=ZAT8 PE=2 SV=1//6.47406e-22
Dendrobium_GLEAN_10040302	1590.59	330.515	2.2668	0.00040327	0.036057	sp|B7F9G7|ADPO1_ORYSJ Heptahelical transmembrane protein ADIPOR1 OS=Oryza sativa subsp. japonica GN=ADIPOR1 PE=2 SV=1//4.1415e-87
Dendrobium_GLEAN_10040737	1347.04	79.1198	4.0896	1.1502e-05	0.002344	-//-
Dendrobium_GLEAN_10040766	369.83	52.0818	2.828	0.00033479	0.031496	sp|Q56YU0|AL2C4_ARATH Aldehyde dehydrogenase family 2 member C4 OS=Arabidopsis thaliana GN=ALDH2C4 PE=1 SV=2//2.06732e-128
Dendrobium_GLEAN_10041251	6.86589	139.126	-4.3408	0.00033879	0.031727	sp|Q9FWX2|NAC7_ARATH NAC domain-containing protein 7 OS=Arabidopsis thaliana GN=NAC007 PE=1 SV=2//1.1255e-88
Dendrobium_GLEAN_10041583	6087.91	1029.05	2.5646	2.8184e-05	0.0050544	sp|Q766C3|NEP1_NEPGR Aspartic proteinase nepenthesin-1 OS=Nepenthes gracilis GN=nep1 PE=1 SV=1//1.45145e-29
Dendrobium_GLEAN_10041778	4249.76	476.274	3.1575	3.946e-07	0.00015384	sp|Q9LT79|PUB25_ARATH U-box domain-containing protein 25 OS=Arabidopsis thaliana GN=PUB25 PE=2 SV=1//5.14898e-88
Dendrobium_GLEAN_10042129	78.7883	6913.22	-6.4552	3.2698e-21	3.9092e-17	sp|P05477|HSP21_SOYBN 17.9 kDa class II heat shock protein OS=Glycine max GN=HSP17.9-D PE=3 SV=1//1.30249e-57
Dendrobium_GLEAN_10042205	0.474618	111.294	-7.8734	8.9274e-06	0.001977	sp|Q0D5B9|SAP16_ORYSJ Zinc finger AN1 and C2H2 domain-containing stress-associated protein 16 OS=Oryza sativa subsp. japonica GN=SAP16 PE=2 SV=2//1.88621e-111
Dendrobium_GLEAN_10042262	30.8091	313.45	-3.3468	0.00010741	0.013614	-//-
Dendrobium_GLEAN_10042843	63.8164	488.913	-2.9376	9.1209e-05	0.012152	sp|O49255|NAC29_ARATH NAC transcription factor 29 OS=Arabidopsis thaliana GN=NAC029 PE=2 SV=1//1.08574e-76
Dendrobium_GLEAN_10043120	2561.67	520.131	2.3001	0.00015537	0.018271	sp|Q9ZPX9|KIC_ARATH Calcium-binding protein KIC OS=Arabidopsis thaliana GN=KIC PE=1 SV=2//3.55371e-38
Dendrobium_GLEAN_10043393	214.552	1.39777	7.2621	0.00010594	0.013474	sp|O80327|TLP1_PYRPY Thaumatin-like protein 1 OS=Pyrus pyrifolia GN=TL1 PE=1 SV=1//3.19037e-59
Dendrobium_GLEAN_10044120	1258.35	8904.58	-2.823	8.1915e-07	0.00027222	sp|Q96303|PHT14_ARATH Inorganic phosphate transporter 1-4 OS=Arabidopsis thaliana GN=PHT1-4 PE=1 SV=1//0
Dendrobium_GLEAN_10044232	3212.34	355.883	3.1741	2.7352e-07	0.00011679	sp|Q9LSE7|B561C_ARATH Cytochrome b561 and DOMON domain-containing protein At3g25290 OS=Arabidopsis thaliana GN=At3g25290 PE=2 SV=1//1.41886e-120
Dendrobium_GLEAN_10044420	1317.81	111.591	3.5619	1.8507e-07	8.51e-05	sp|Q94CH6|EXL3_ARATH GDSL esterase/lipase EXL3 OS=Arabidopsis thaliana GN=EXL3 PE=2 SV=1//4.8748e-86
Dendrobium_GLEAN_10044602	48.7803	433.896	-3.153	3.7167e-05	0.0063339	sp|I4DST8|TCEA1_TULGE Tuliposide A-converting enzyme 1, chloroplastic OS=Tulipa gesneriana GN=TCEA1 PE=1 SV=1//9.99677e-71
Dendrobium_GLEAN_10044684	1005.53	166.474	2.5946	0.00011661	0.014494	sp|Q9LX14|UFC_ARATH Protein UPSTREAM OF FLC OS=Arabidopsis thaliana GN=UFC PE=2 SV=1//9.83564e-32
Dendrobium_GLEAN_10045158	486.178	2561.71	-2.3976	4.7653e-05	0.0074964	sp|Q9M0G0|GAGT3_ARATH Gamma-glutamyltranspeptidase 3 OS=Arabidopsis thaliana GN=GGT3 PE=2 SV=1//0
Dendrobium_GLEAN_10045442	25.169	243.302	-3.273	0.00038378	0.034672	sp|Q1PDW5|FTSH6_ARATH ATP-dependent zinc metalloprotease FTSH 6, chloroplastic OS=Arabidopsis thaliana GN=FTSH6 PE=2 SV=1//0
Dendrobium_GLEAN_10045745	138.849	1584.13	-3.5121	3.2765e-08	1.9918e-05	-//-
Dendrobium_GLEAN_10046043	210.475	10.8413	4.279	5.8191e-05	0.0084843	sp|Q39176|ERLI1_ARATH Lipid transfer protein EARLI 1 OS=Arabidopsis thaliana GN=EARLI1 PE=1 SV=1//1.12607e-18
Dendrobium_GLEAN_10046368	92.2845	0.416973	7.79	5.0979e-05	0.0077477	sp|O80477|MES3_ARATH Methylesterase 3 OS=Arabidopsis thaliana GN=MES3 PE=2 SV=1//8.28024e-22
Dendrobium_GLEAN_10046585	844.262	3571.37	-2.0807	0.00024976	0.025522	sp|Q9FKS8|LHT1_ARATH Lysine histidine transporter 1 OS=Arabidopsis thaliana GN=LHT1 PE=1 SV=1//2.10269e-166
Dendrobium_GLEAN_10046758	1600.4	282.656	2.5013	4.6157e-05	0.0073419	sp|Q8LPH6|MYB86_ARATH Transcription factor MYB86 OS=Arabidopsis thaliana GN=MYB86 PE=2 SV=1//3.13157e-80
Dendrobium_GLEAN_10046777	397.972	6293.82	-3.9832	0.00013222	0.01613	sp|Q6EQ60|AB47G_ORYSJ ABC transporter G family member 47 OS=Oryza sativa subsp. japonica GN=ABCG47 PE=3 SV=2//8.03269e-08
Dendrobium_GLEAN_10047213	2676.14	482.469	2.4716	8.2396e-05	0.011294	sp|Q8L868|E1311_ARATH Glucan endo-1,3-beta-glucosidase 11 OS=Arabidopsis thaliana GN=At1g32860 PE=1 SV=1//3.85721e-58
Dendrobium_GLEAN_10047312	1334.37	5118.27	-1.9395	0.00053259	0.04368	sp|O49169|EF1A_MANES Elongation factor 1-alpha OS=Manihot esculenta GN=EF1 PE=3 SV=1//8.57245e-59
Dendrobium_GLEAN_10047925	9049.05	1121.06	3.0129	3.5698e-07	0.00014147	sp|O04621|TBL26_ARATH Protein trichome birefringence-like 26 OS=Arabidopsis thaliana GN=TBL26 PE=2 SV=1//1.41648e-138
Dendrobium_GLEAN_10048035	541.79	78.5506	2.786	0.00016654	0.019331	sp|Q8W4K5|VAB_ARATH VAN3-binding protein OS=Arabidopsis thaliana GN=VAB PE=1 SV=1//1.03022e-29
Dendrobium_GLEAN_10048036	563.458	61.7248	3.1904	1.9595e-05	0.0036606	sp|Q8W4K5|VAB_ARATH VAN3-binding protein OS=Arabidopsis thaliana GN=VAB PE=1 SV=1//7.81909e-25
Dendrobium_GLEAN_10048226	217.65	1135.56	-2.3833	0.00032889	0.031236	sp|Q9P6Q3|BCS1_SCHPO Probable mitochondrial chaperone bcs1 OS=Schizosaccharomyces pombe (strain 972 / ATCC 24843) GN=SPAC644.07 PE=2 SV=1//1.96374e-25
Dendrobium_GLEAN_10048652	2894.48	541.591	2.418	6.9193e-05	0.0098373	sp|P0A573|Y2734_MYCBO Uncharacterized protein Mb2734 OS=Mycobacterium bovis (strain ATCC BAA-935 / AF2122/97) GN=Mb2734 PE=3 SV=1//2.03064e-08
Dendrobium_GLEAN_10049133	819.441	133.669	2.616	0.00011	0.013893	sp|Q52QH4|NAC68_ORYSJ NAC domain-containing protein 68 OS=Oryza sativa subsp. japonica GN=NAC68 PE=2 SV=1//6.06488e-98
Dendrobium_GLEAN_10049214	24234.3	1463.67	4.0494	0.00028059	0.027572	-//-
Dendrobium_GLEAN_10049220	59.8625	501.73	-3.0672	3.6813e-05	0.0063176	-//-
Dendrobium_GLEAN_10049299	1555.9	237.537	2.7115	1.926e-05	0.0036168	sp|P24465|C71A1_PERAE Cytochrome P450 71A1 OS=Persea americana GN=CYP71A1 PE=1 SV=2//1.2789e-124
Dendrobium_GLEAN_10049312	6380.44	783.881	3.0249	9.1361e-07	0.00029257	sp|Q93VR4|ML423_ARATH MLP-like protein 423 OS=Arabidopsis thaliana GN=MLP423 PE=2 SV=1//2.17533e-41
Dendrobium_GLEAN_10049676	151.992	872.824	-2.5217	6.9572e-05	0.0098373	sp|Q9FH94|ERF10_ARATH Ethylene-responsive transcription factor ERF010 OS=Arabidopsis thaliana GN=ERF010 PE=2 SV=1//2.00355e-37
Dendrobium_GLEAN_10049766	2238.58	211.183	3.406	2.83e-08	1.8126e-05	sp|Q9LZW3|PUB16_ARATH U-box domain-containing protein 16 OS=Arabidopsis thaliana GN=PUB16 PE=2 SV=1//1.67539e-159
Dendrobium_GLEAN_10049832	1164.87	222.341	2.3893	0.00039211	0.035336	sp|Q8W453|DIRL1_ARATH Putative lipid-transfer protein DIR1 OS=Arabidopsis thaliana GN=DIR1 PE=1 SV=1//7.158e-11
Dendrobium_GLEAN_10050376	313.908	39.5363	2.9891	0.0006303	0.049253	sp|Q93ZS4|NIK3_ARATH Protein NSP-INTERACTING KINASE 3 OS=Arabidopsis thaliana GN=NIK3 PE=1 SV=1//2.33148e-122
Dendrobium_GLEAN_10050539	1808.03	354.71	2.3497	0.00026659	0.026709	sp|Q00624|ASOL_BRANA L-ascorbate oxidase homolog OS=Brassica napus GN=Bp10 PE=2 SV=1//6.46248e-112
Dendrobium_GLEAN_10050694	1591.05	314.182	2.3403	0.00028317	0.02775	sp|Q9LRT1|Y3804_ARATH Probably inactive leucine-rich repeat receptor-like protein kinase At3g28040 OS=Arabidopsis thaliana GN=At3g28040 PE=2 SV=1//4.61501e-11
Dendrobium_GLEAN_10051100	3491.19	186.688	4.225	2.6484e-10	4.3177e-07	-//-
Dendrobium_GLEAN_10051326	444.29	0.416973	10.057	2.2795e-15	1.168e-11	sp|Q9ASS7|CAAT2_ARATH Cationic amino acid transporter 2, vacuolar OS=Arabidopsis thaliana GN=CAT2 PE=2 SV=1//1.91322e-146
Dendrobium_GLEAN_10051437	9156.15	1190.49	2.9432	2.1146e-06	0.00061164	sp|Q9LE73|NUDT4_ARATH Nudix hydrolase 4 OS=Arabidopsis thaliana GN=NUDT4 PE=1 SV=1//5.21004e-57
Dendrobium_GLEAN_10053517	13.9209	187.877	-3.7545	0.00022697	0.024045	sp|O22150|SAU36_ARATH Auxin-responsive protein SAUR36 OS=Arabidopsis thaliana GN=SAUR36 PE=2 SV=1//1.71617e-18
Dendrobium_GLEAN_10054305	21677.1	412.077	5.7171	4.819e-07	0.00018387	sp|P07369|CB2G_SOLLC Chlorophyll a-b binding protein 3C, chloroplastic OS=Solanum lycopersicum GN=CAB3C PE=3 SV=1//3.14306e-161
Dendrobium_GLEAN_10054606	373.531	4.8804	6.2581	4.1865e-10	5.3627e-07	sp|Q38910|XTH23_ARATH Probable xyloglucan endotransglucosylase/hydrolase protein 23 OS=Arabidopsis thaliana GN=XTH23 PE=2 SV=1//7.37123e-136
Dendrobium_GLEAN_10054762	169.053	2.81911	5.9061	6.9216e-05	0.0098373	sp|Q39261|ZFP2_ARATH Zinc finger protein 2 OS=Arabidopsis thaliana GN=ZFP2 PE=2 SV=1//2.2625e-16
Dendrobium_GLEAN_10055032	896.426	191.366	2.2279	0.00059603	0.047088	sp|Q6YUU5|MDR_ORYSJ Putative multidrug resistance protein OS=Oryza sativa subsp. japonica GN=Os02g0190300 PE=3 SV=1//3.49252e-40
Dendrobium_GLEAN_10055040	1554.82	223.6	2.7978	1.9743e-05	0.0036691	sp|Q8GSM7|HST_TOBAC Shikimate O-hydroxycinnamoyltransferase OS=Nicotiana tabacum GN=HST PE=1 SV=1//5.23992e-30
Dendrobium_GLEAN_10056197	22198.9	3385.32	2.7131	3.5021e-06	0.00091685	sp|B8ANF1|CHLH_ORYSI Magnesium-chelatase subunit ChlH, chloroplastic OS=Oryza sativa subsp. indica GN=CHLH PE=3 SV=1//0
Dendrobium_GLEAN_10056336	51.5638	345.203	-2.743	0.00052372	0.043382	sp|Q9XIW0|CIPK7_ARATH CBL-interacting serine/threonine-protein kinase 7 OS=Arabidopsis thaliana GN=CIPK7 PE=1 SV=1//3.00545e-126
Dendrobium_GLEAN_10056490	248.46	10.718	4.5349	9.3079e-06	0.0020481	sp|E3SXU4|BHLHW_PEA Basic helix-loop-helix protein A OS=Pisum sativum GN=BHLH PE=3 SV=1//4.40998e-129
Dendrobium_GLEAN_10056672	799.939	4897.37	-2.614	5.6926e-06	0.0014129	sp|Q88BD4|ALGC_PSESM Phosphomannomutase/phosphoglucomutase OS=Pseudomonas syringae pv. tomato (strain DC3000) GN=algC PE=3 SV=1//1.84468e-30
Dendrobium_GLEAN_10057390	9745.01	42.1398	7.8533	2.6359e-25	4.7271e-21	sp|Q9M667|RPP13_ARATH Disease resistance protein RPP13 OS=Arabidopsis thaliana GN=RPP13 PE=2 SV=2//1.75311e-46
Dendrobium_GLEAN_10057486	552.844	91.183	2.6	0.0004788	0.040598	sp|Q9FFX4|KNU_ARATH Zinc finger protein KNUCKLES OS=Arabidopsis thaliana GN=KNU PE=1 SV=1//3.90989e-09
Dendrobium_GLEAN_10057707	299.4	32.9355	3.1844	0.00024934	0.025522	sp|Q9SK99|PTR11_ARATH Protein NRT1/ PTR FAMILY 5.15 OS=Arabidopsis thaliana GN=NPF5.15 PE=2 SV=1//7.04886e-68
Dendrobium_GLEAN_10057708	1137.19	244.294	2.2188	0.0002911	0.028449	sp|Q0WP01|PTR9_ARATH Protein NRT1/ PTR FAMILY 5.10 OS=Arabidopsis thaliana GN=NPF5.10 PE=2 SV=1//7.35421e-95
Dendrobium_GLEAN_10058365	0	211.534	#NAME?	3.07e-10	4.588e-07	sp|P49249|IN22_MAIZE IN2-2 protein OS=Zea mays GN=IN2-2 PE=2 SV=1//2.70486e-51
Dendrobium_GLEAN_10058951	324.032	27.397	3.564	7.3547e-05	0.010224	sp|Q6H5U3|DES1L_ORYSJ Sphingolipid delta(4)-desaturase DES1-like OS=Oryza sativa subsp. japonica GN=Os02g0639600 PE=2 SV=1//1.58087e-171
Dendrobium_GLEAN_10058953	407.298	32.1069	3.6651	1.7624e-05	0.0033269	sp|Q9M0I2|EXPB3_ARATH Expansin-B3 OS=Arabidopsis thaliana GN=EXPB3 PE=2 SV=2//1.74451e-16
Dendrobium_GLEAN_10059031	2866.67	526.395	2.4452	7.2902e-05	0.010174	sp|Q9FF10|HPSE1_ARATH Heparanase-like protein 1 OS=Arabidopsis thaliana GN=At5g07830 PE=2 SV=1//0
Dendrobium_GLEAN_10059033	214.449	11.523	4.218	2.505e-05	0.0045148	sp|Q9LF37|CLPB3_ARATH Chaperone protein ClpB3, chloroplastic OS=Arabidopsis thaliana GN=CLPB3 PE=2 SV=1//1.27567e-46
Dendrobium_GLEAN_10059488	582.141	109.497	2.4105	0.00036775	0.033648	sp|P17847|NIR_MAIZE Ferredoxin--nitrite reductase, chloroplastic (Fragment) OS=Zea mays GN=NIR PE=2 SV=1//1.81384e-33
Dendrobium_GLEAN_10059592	707.159	126.854	2.4789	0.00057965	0.045991	sp|Q9LYT5|PME35_ARATH Probable pectinesterase/pectinesterase inhibitor 35 OS=Arabidopsis thaliana GN=PME35 PE=2 SV=1//1.6868e-45
Dendrobium_GLEAN_10059786	266.148	14.0955	4.2389	0.00020175	0.022129	-//-
Dendrobium_GLEAN_10060246	1650.93	226.725	2.8643	6.5641e-06	0.0015433	sp|Q9LXD9|PME51_ARATH Probable pectinesterase/pectinesterase inhibitor 51 OS=Arabidopsis thaliana GN=PME51 PE=2 SV=1//1.58074e-168
Dendrobium_GLEAN_10060915	6.13791	325.722	-5.7297	5.1107e-09	4.7002e-06	-//-
Dendrobium_GLEAN_10060937	331.433	14.0538	4.5597	1.2547e-05	0.0025185	sp|P04146|COPIA_DROME Copia protein OS=Drosophila melanogaster GN=GIP PE=1 SV=3//2.15638e-59
Dendrobium_GLEAN_10061271	324.69	1411	-2.1196	0.00050228	0.041799	sp|Q9C7N2|CAD1_ARATH MACPF domain-containing protein CAD1 OS=Arabidopsis thaliana GN=CAD1 PE=2 SV=1//9.70062e-100
Dendrobium_GLEAN_10061524	5030.42	1192.03	2.0773	0.00047661	0.040508	-//-
Dendrobium_GLEAN_10061822	48.527	350.242	-2.8515	0.00031604	0.030227	sp|Q9M0G0|GAGT3_ARATH Gamma-glutamyltranspeptidase 3 OS=Arabidopsis thaliana GN=GGT3 PE=2 SV=1//1.71943e-34
Dendrobium_GLEAN_10061851	844.762	158.769	2.4116	0.00041282	0.036455	sp|Q9LPR8|SCL3_ARATH Scarecrow-like protein 3 OS=Arabidopsis thaliana GN=SCL3 PE=2 SV=1//8.06222e-78
Dendrobium_GLEAN_10061986	936.581	162.076	2.5307	0.00013953	0.016835	-//-
Dendrobium_GLEAN_10062370	991.415	97.4141	3.3473	1.6105e-06	0.00048314	sp|Q8RX80|CRK18_ARATH Cysteine-rich receptor-like protein kinase 18 OS=Arabidopsis thaliana GN=CRK18 PE=2 SV=2//1.14741e-44
Dendrobium_GLEAN_10063635	630.906	3563.54	-2.4978	3.9641e-05	0.006567	sp|Q8LDI5|CXXS1_ARATH Thioredoxin-like protein CXXS1 OS=Arabidopsis thaliana GN=CXXS1 PE=2 SV=2//1.72752e-49
Dendrobium_GLEAN_10064134	690.343	56.7682	3.6042	7.41e-07	0.00025555	sp|P51094|UFOG_VITVI Anthocyanidin 3-O-glucosyltransferase 2 OS=Vitis vinifera GN=UFGT PE=1 SV=2//8.13121e-75
Dendrobium_GLEAN_10064246	1.53448	161.391	-6.7167	7.8917e-07	0.00026881	sp|P49249|IN22_MAIZE IN2-2 protein OS=Zea mays GN=IN2-2 PE=2 SV=1//1.49608e-27
Dendrobium_GLEAN_10064258	574.323	86.2319	2.7356	0.00022229	0.023773	sp|Q9LSL1|BH093_ARATH Transcription factor bHLH93 OS=Arabidopsis thaliana GN=BHLH93 PE=1 SV=1//7.63747e-32
Dendrobium_GLEAN_10064461	2170.31	111.457	4.2833	7.9759e-09	6.8112e-06	sp|Q9FKP1|CCX1_ARATH Cation/calcium exchanger 1 OS=Arabidopsis thaliana GN=CCX1 PE=2 SV=1//4.27739e-115
Dendrobium_GLEAN_10064484	547.946	46.3203	3.5643	2.2098e-06	0.00062409	-//-
Dendrobium_GLEAN_10064489	1237.48	242.53	2.3512	0.00022726	0.024045	sp|Q9C5J9|Y5483_ARATH Uncharacterized GTP-binding protein At5g64813 OS=Arabidopsis thaliana GN=At5g64813 PE=1 SV=1//9.18632e-98
Dendrobium_GLEAN_10064494	7338.67	1683.64	2.1239	0.00023145	0.024304	sp|Q02283|HAT5_ARATH Homeobox-leucine zipper protein HAT5 OS=Arabidopsis thaliana GN=HAT5 PE=1 SV=1//4.40338e-40
Dendrobium_GLEAN_10065111	389.6	26.8567	3.8586	0.00042103	0.036846	sp|Q9ZWR8|ANTA_GENTR Anthocyanin 5-aromatic acyltransferase OS=Gentiana triflora PE=1 SV=1//3.62767e-61
Dendrobium_GLEAN_10065442	862.992	69.2411	3.6396	6.1509e-07	0.00022284	sp|Q8VY93|GDL66_ARATH GDSL esterase/lipase At4g26790 OS=Arabidopsis thaliana GN=At4g26790 PE=2 SV=1//4.16552e-80
Dendrobium_GLEAN_10065444	301.99	25.0184	3.5934	9.026e-05	0.01208	sp|Q9SJB4|GDL34_ARATH GDSL esterase/lipase At2g04570 OS=Arabidopsis thaliana GN=At2g04570 PE=2 SV=1//2.87901e-43
Dendrobium_GLEAN_10065487	36.219	881.653	-4.6054	4.1554e-10	5.3627e-07	-//-
Dendrobium_GLEAN_10065772	0	171.975	#NAME?	8.4148e-09	7.0189e-06	-//-
Dendrobium_GLEAN_10065813	548.494	61.7302	3.1514	0.00047565	0.040508	-//-
Dendrobium_GLEAN_10065815	845.434	3372.82	-1.9962	0.00042119	0.036846	sp|Q8GT20|BEBT_TOBAC Benzyl alcohol O-benzoyltransferase OS=Nicotiana tabacum GN=HSR201 PE=1 SV=1//0
Dendrobium_GLEAN_10066138	2298.77	225.061	3.3525	3.6064e-08	2.1205e-05	sp|Q96502|COL2_ARATH Zinc finger protein CONSTANS-LIKE 2 OS=Arabidopsis thaliana GN=COL2 PE=1 SV=1//5.20153e-65
Dendrobium_GLEAN_10066166	4127.37	1056.76	1.9656	0.00053178	0.04368	sp|Q9MA41|CTL1_ARATH Chitinase-like protein 1 OS=Arabidopsis thaliana GN=CTL1 PE=1 SV=1//3.53153e-101
Dendrobium_GLEAN_10066306	848.166	45.6441	4.2158	1.9365e-08	1.3105e-05	-//-
Dendrobium_GLEAN_10066307	827.565	47.4353	4.1248	3.5612e-08	2.1205e-05	-//-
Dendrobium_GLEAN_10066692	432.321	1928.88	-2.1576	0.00018646	0.020899	-//-
Dendrobium_GLEAN_10067132	1271.29	49.9263	4.6703	9.3995e-11	1.7744e-07	sp|O49485|SERA1_ARATH D-3-phosphoglycerate dehydrogenase 1, chloroplastic OS=Arabidopsis thaliana GN=PGDH1 PE=1 SV=1//0
Dendrobium_GLEAN_10067188	3342.88	192.959	4.1147	8.9556e-05	0.01203	sp|Q6GKX7|GASAC_ARATH Gibberellin-regulated protein 12 OS=Arabidopsis thaliana GN=GASA12 PE=3 SV=1//2.22283e-14
Dendrobium_GLEAN_10068550	622.061	3719.61	-2.58	1.0471e-05	0.0021963	sp|P28583|CDPK_SOYBN Calcium-dependent protein kinase SK5 OS=Glycine max PE=1 SV=1//8.79069e-174
Dendrobium_GLEAN_10068766	643.765	55.1583	3.5449	2.9346e-05	0.0052278	-//-
Dendrobium_GLEAN_10068785	501.123	69.2303	2.8557	0.00016949	0.019422	sp|Q5XF57|Y5576_ARATH Probable receptor-like serine/threonine-protein kinase At5g57670 OS=Arabidopsis thaliana GN=At5g57670 PE=2 SV=1//2.4009e-117
Dendrobium_GLEAN_10068809	389.684	26.0228	3.9045	5.712e-06	0.0014129	sp|B3TPQ7|ATESY_MAGGA Alpha-terpineol synthase, chloroplastic OS=Magnolia grandiflora PE=1 SV=1//6.02048e-45
Dendrobium_GLEAN_10069222	14.1422	399.066	-4.8186	3.2036e-08	1.9918e-05	sp|Q9LRJ9|CRR38_ARATH Cysteine-rich repeat secretory protein 38 OS=Arabidopsis thaliana GN=CRRSP38 PE=2 SV=1//1.30504e-40
Dendrobium_GLEAN_10069223	18.1604	396.018	-4.4467	1.9985e-07	8.9601e-05	sp|Q9LDM5|CRK31_ARATH Putative cysteine-rich receptor-like protein kinase 31 OS=Arabidopsis thaliana GN=CRK31 PE=3 SV=1//5.07933e-10
Dendrobium_GLEAN_10069328	701.973	68.0138	3.3675	5.8732e-06	0.001433	-//-
Dendrobium_GLEAN_10069747	202.38	6.40145	4.9825	9.5993e-06	0.0020994	sp|Q84TG3|PUB23_ARATH E3 ubiquitin-protein ligase PUB23 OS=Arabidopsis thaliana GN=PUB23 PE=1 SV=1//8.73398e-119
Dendrobium_GLEAN_10069911	6126.21	30.1291	7.6677	2.9338e-10	4.5751e-07	sp|P53416|BBS_PHASS Bibenzyl synthase OS=Phalaenopsis sp. GN=BIBSY212 PE=2 SV=1//0
Dendrobium_GLEAN_10071059	7.30839	288.368	-5.3022	3.9182e-06	0.0010161	sp|Q0VCZ3|YTHD2_BOVIN YTH domain-containing family protein 2 OS=Bos taurus GN=YTHDF2 PE=2 SV=1//1.37234e-58
Dendrobium_GLEAN_10073181	0	97.2799	#NAME?	7.1505e-06	0.0016373	sp|O64629|AUR3_ARATH Serine/threonine-protein kinase Aurora-3 OS=Arabidopsis thaliana GN=AUR3 PE=2 SV=1//2.60189e-53
Dendrobium_GLEAN_10073293	1964.33	329.353	2.5763	4.4664e-05	0.0071516	sp|Q9FH92|IX15L_ARATH Protein IRX15-LIKE OS=Arabidopsis thaliana GN=IRX15-L PE=2 SV=1//4.76724e-95
Dendrobium_GLEAN_10073768	39059.2	7333.85	2.413	0.0002921	0.028469	sp|Q8RWE8|GGAP1_ARATH GDP-L-galactose phosphorylase 1 OS=Arabidopsis thaliana GN=VTC2 PE=1 SV=1//0
Dendrobium_GLEAN_10073938	179.985	3424.71	-4.25	2.5512e-09	2.5417e-06	sp|Q09893|YAI5_SCHPO Uncharacterized protein C24B11.05 OS=Schizosaccharomyces pombe (strain 972 / ATCC 24843) GN=SPAC24B11.05 PE=3 SV=1//6.90522e-17
Dendrobium_GLEAN_10074005	456.764	29.9931	3.9287	1.6499e-06	0.00048906	sp|Q9ZVC2|NPR5_ARATH Regulatory protein NPR5 OS=Arabidopsis thaliana GN=NPR5 PE=1 SV=1//1.60878e-119
Dendrobium_GLEAN_10074006	185.463	15.6456	3.5673	0.00056083	0.045156	sp|Q9ZVC2|NPR5_ARATH Regulatory protein NPR5 OS=Arabidopsis thaliana GN=NPR5 PE=1 SV=1//1.25475e-63
Dendrobium_GLEAN_10074308	11365.3	2875.24	1.9829	0.000314	0.030113	sp|Q43007|PLDA1_ORYSJ Phospholipase D alpha 1 OS=Oryza sativa subsp. japonica GN=PLD1 PE=1 SV=2//8.50437e-36
Dendrobium_GLEAN_10074616	1083.7	175.312	2.628	9.8964e-05	0.012907	sp|Q8GU87|AB31G_ORYSJ ABC transporter G family member 31 OS=Oryza sativa subsp. japonica GN=ABCG31 PE=2 SV=3//3.0125e-07
Dendrobium_GLEAN_10074935	80.908	0.833947	6.6002	0.00039487	0.035407	sp|F4JRF4|MUTYH_ARATH A/G-specific adenine DNA glycosylase OS=Arabidopsis thaliana GN=MYH PE=3 SV=1//3.95803e-130
Dendrobium_GLEAN_10075063	596.524	60.5971	3.2993	8.9294e-06	0.001977	-//-
Dendrobium_GLEAN_10075632	489.805	61.5834	2.9916	0.00012355	0.015175	sp|Q8S3D2|BH087_ARATH Transcription factor bHLH87 OS=Arabidopsis thaliana GN=BHLH87 PE=2 SV=1//7.91869e-32
Dendrobium_GLEAN_10075996	970.643	151.138	2.6831	0.00010448	0.013427	sp|Q944R1|PLY15_ARATH Probable pectate lyase 15 OS=Arabidopsis thaliana GN=At4g13710 PE=2 SV=1//0
Dendrobium_GLEAN_10076097	591.52	111.745	2.4042	0.00054532	0.044251	sp|Q9LFE4|Y5673_ARATH WEB family protein At5g16730, chloroplastic OS=Arabidopsis thaliana GN=At5g16730 PE=1 SV=1//2.93832e-19
Dendrobium_GLEAN_10076582	52.6236	346.3	-2.7182	0.00048414	0.040954	sp|Q94IW5|C90D2_ORYSJ Cytochrome P450 90D2 OS=Oryza sativa subsp. japonica GN=CYP90D2 PE=1 SV=1//7.95163e-72
Dendrobium_GLEAN_10078283	1080.09	168.184	2.683	4.882e-05	0.0075611	sp|Q93XM7|MCAT_ARATH Mitochondrial carnitine/acylcarnitine carrier-like protein OS=Arabidopsis thaliana GN=BOU PE=2 SV=1//1.07066e-167
Dendrobium_GLEAN_10078303	190.887	0.416973	8.8385	8.9121e-09	7.2648e-06	-//-
Dendrobium_GLEAN_10078304	2692.78	420.121	2.6802	0.00039453	0.035407	sp|Q55680|Y005_SYNY3 Uncharacterized protein sll0005 OS=Synechocystis sp. (strain PCC 6803 / Kazusa) GN=sll0005 PE=3 SV=1//3.98298e-143
Dendrobium_GLEAN_10078762	643.444	90.7335	2.8261	2.2232e-05	0.0040892	sp|Q8VWZ7|C76B6_CATRO Geraniol 8-hydroxylase OS=Catharanthus roseus GN=CYP76B6 PE=1 SV=1//3.87119e-37
Dendrobium_GLEAN_10078763	1348.85	310.957	2.1169	0.00036514	0.033495	sp|D1MI46|C76BA_SWEMU Geraniol 8-hydroxylase OS=Swertia mussotii GN=CYP76B10 PE=1 SV=1//5.00678e-96
Dendrobium_GLEAN_10078993	2913.45	540.403	2.4306	0.00014612	0.017497	sp|Q9LTA3|U91C1_ARATH UDP-glycosyltransferase 91C1 OS=Arabidopsis thaliana GN=UGT91C1 PE=2 SV=1//5.68417e-26
Dendrobium_GLEAN_10079068	1825.63	351.246	2.3778	8.5119e-05	0.011521	sp|Q9LDD1|BRG3_ARATH Probable BOI-related E3 ubiquitin-protein ligase 3 OS=Arabidopsis thaliana GN=BRG3 PE=1 SV=1//5.12094e-56
Dendrobium_GLEAN_10080165	203.311	12.2391	4.0541	0.00016298	0.018979	sp|Q9LT24|Y3985_ARATH BTB/POZ domain-containing protein At3g19850 OS=Arabidopsis thaliana GN=At3g19850 PE=2 SV=1//9.15345e-135
Dendrobium_GLEAN_10080871	13.8977	291.537	-4.3908	2.939e-06	0.0007859	sp|Q9FY79|LAC14_ARATH Laccase-14 OS=Arabidopsis thaliana GN=LAC14 PE=2 SV=1//0
Dendrobium_GLEAN_10080949	2889.24	236.025	3.6137	2.311e-08	1.5071e-05	sp|Q9SPG2|MYB28_ARATH Transcription factor MYB28 OS=Arabidopsis thaliana GN=MYB28 PE=1 SV=1//8.73439e-66
Dendrobium_GLEAN_10082522	14.9255	228.355	-3.9354	5.0285e-05	0.0076909	-//-
Dendrobium_GLEAN_10082937	1488.75	7051.21	-2.2438	8.2505e-05	0.011294	sp|Q9FKW4|CDPKS_ARATH Calcium-dependent protein kinase 28 OS=Arabidopsis thaliana GN=CPK28 PE=1 SV=1//1.58082e-65
Dendrobium_GLEAN_10083788	1865.89	260.895	2.8383	4.5446e-06	0.001156	sp|Q9SIV3|GLK1_ARATH Transcription activator GLK1 OS=Arabidopsis thaliana GN=GLK1 PE=1 SV=2//5.13455e-59
Dendrobium_GLEAN_10083807	427.504	40.8108	3.3889	3.4282e-05	0.0059401	-//-
Dendrobium_GLEAN_10084248	129.083	2.67226	5.5941	3.9731e-05	0.006567	sp|Q9SUF1|WTR31_ARATH WAT1-related protein At4g08290 OS=Arabidopsis thaliana GN=At4g08290 PE=2 SV=1//1.33636e-41
Dendrobium_GLEAN_10084654	10429.8	766.198	3.7669	1.0108e-08	7.7136e-06	sp|Q10RB4|BGAL5_ORYSJ Beta-galactosidase 5 OS=Oryza sativa subsp. japonica GN=Os03g0165400 PE=2 SV=1//0
Dendrobium_GLEAN_10085264	101.39	2.52541	5.3272	0.00027838	0.027506	sp|Q42381|HLS1_ARATH Probable N-acetyltransferase HLS1 OS=Arabidopsis thaliana GN=HLS1 PE=1 SV=1//6.93251e-56
Dendrobium_GLEAN_10085592	1190.23	7558.08	-2.6668	2.5715e-06	0.00069635	sp|Q9AWL7|GIGAN_ORYSJ Protein GIGANTEA OS=Oryza sativa subsp. japonica GN=GI PE=2 SV=2//0
Dendrobium_GLEAN_10085593	192.241	1439.53	-2.9046	2.9865e-06	0.00078763	sp|Q9AWL7|GIGAN_ORYSJ Protein GIGANTEA OS=Oryza sativa subsp. japonica GN=GI PE=2 SV=2//2.88575e-99
Dendrobium_GLEAN_10085688	553.099	27.6852	4.3203	5.1938e-08	2.9107e-05	sp|Q6YWK8|CSLAB_ORYSJ Probable mannan synthase 11 OS=Oryza sativa subsp. japonica GN=CSLA11 PE=2 SV=1//2.26906e-158
Dendrobium_GLEAN_10085752	662.999	110.193	2.589	0.00031231	0.030031	sp|Q9FL51|Y5694_ARATH Probably inactive leucine-rich repeat receptor-like protein kinase At5g06940 OS=Arabidopsis thaliana GN=At5g06940 PE=3 SV=1//0
Dendrobium_GLEAN_10086147	9177.63	2284.12	2.0065	0.0005359	0.043722	sp|Q94JM3|ARFB_ARATH Auxin response factor 2 OS=Arabidopsis thaliana GN=ARF2 PE=1 SV=2//0
Dendrobium_GLEAN_10086556	10.8841	228.085	-4.3893	1.4712e-05	0.0028677	-//-
Dendrobium_GLEAN_10086816	675.298	47.5821	3.827	5.4354e-07	0.00020308	-//-
Dendrobium_GLEAN_10086878	53.5176	479.146	-3.1624	0.00040628	0.03607	sp|O80725|AB4B_ARATH ABC transporter B family member 4 OS=Arabidopsis thaliana GN=ABCB4 PE=1 SV=1//2.48586e-128
Dendrobium_GLEAN_10087099	413.509	19734.7	-5.5767	4.0036e-18	3.59e-14	sp|P31673|HS174_ORYSJ 17.4 kDa class I heat shock protein OS=Oryza sativa subsp. japonica GN=HSP17.4 PE=2 SV=2//1.31213e-49
Dendrobium_GLEAN_10087378	337.548	0	Inf	4.3049e-13	1.4243e-09	-//-
Dendrobium_GLEAN_10087455	2000.76	327.62	2.6105	1.2569e-05	0.0025185	sp|Q8S7W9|HOX21_ORYSJ Homeobox-leucine zipper protein HOX21 OS=Oryza sativa subsp. japonica GN=HOX21 PE=2 SV=1//2.18256e-87
Dendrobium_GLEAN_10087645	6227.83	575.811	3.4351	9.9926e-06	0.0021461	sp|Q9LIS1|CR26L_ARATH Protein ECERIFERUM 26-like OS=Arabidopsis thaliana GN=CER26L PE=2 SV=1//6.33669e-21
Dendrobium_GLEAN_10088405	5363.25	291.225	4.2029	4.5055e-11	8.9776e-08	sp|P14133|ASO_CUCSA L-ascorbate oxidase OS=Cucumis sativus PE=1 SV=1//0
Dendrobium_GLEAN_10088790	1016.86	157.085	2.6945	3.7413e-05	0.0063339	sp|Q9C6B9|PEAM3_ARATH Phosphoethanolamine N-methyltransferase 3 OS=Arabidopsis thaliana GN=NMT3 PE=2 SV=2//1.40175e-152
Dendrobium_GLEAN_10088989	121.2	1243.32	-3.3587	1.8826e-07	8.5471e-05	sp|A2A1A0|NCS1_COPJA S-norcoclaurine synthase 1 OS=Coptis japonica GN=NCS1 PE=1 SV=1//5.81127e-112
Dendrobium_GLEAN_10089012	862.38	145.538	2.5669	0.0001143	0.014334	sp|Q944H0|PEAM2_ARATH Phosphomethylethanolamine N-methyltransferase OS=Arabidopsis thaliana GN=NMT2 PE=2 SV=2//4.10212e-43
Dendrobium_GLEAN_10089060	163.11	3.21251	5.666	6.6131e-06	0.0015433	sp|Q9ASS7|CAAT2_ARATH Cationic amino acid transporter 2, vacuolar OS=Arabidopsis thaliana GN=CAT2 PE=2 SV=1//4.63274e-42
Dendrobium_GLEAN_10089381	2.48371	313.704	-6.9808	0.00021527	0.023256	sp|P0A3U1|LTRA_LACLM Group II intron-encoded protein LtrA OS=Lactococcus lactis subsp. cremoris (strain MG1363) GN=ltrA PE=1 SV=1//9.77025e-22
Dendrobium_GLEAN_10089527	164.428	8.92686	4.2032	0.00023559	0.024493	sp|Q7XJ98|KATAM_ARATH Xyloglucan galactosyltransferase KATAMARI1 OS=Arabidopsis thaliana GN=KAM1 PE=1 SV=1//3.25569e-91
Dendrobium_GLEAN_10089647	228.148	2245.63	-3.2991	5.4279e-08	2.9951e-05	sp|P46897|ATHB7_ARATH Homeobox-leucine zipper protein ATHB-7 OS=Arabidopsis thaliana GN=ATHB-7 PE=2 SV=2//1.16218e-23
Dendrobium_GLEAN_10089671	50773.2	2698	4.2341	3.2669e-12	9.0134e-09	sp|P12062|CB26_PETSP Chlorophyll a-b binding protein 37, chloroplastic OS=Petunia sp. GN=CAB37 PE=3 SV=1//1.32206e-167
Dendrobium_GLEAN_10089945	2111.06	299.949	2.8152	5.6708e-06	0.0014129	sp|Q40478|ERF5_TOBAC Ethylene-responsive transcription factor 5 OS=Nicotiana tabacum GN=ERF5 PE=2 SV=1//2.17002e-27
Dendrobium_GLEAN_10090480	70.3362	751.905	-3.4182	1.0628e-06	0.00033735	sp|Q56YU0|AL2C4_ARATH Aldehyde dehydrogenase family 2 member C4 OS=Arabidopsis thaliana GN=ALDH2C4 PE=1 SV=2//0
Dendrobium_GLEAN_10090991	6984.42	954.448	2.8714	2.5822e-06	0.00069635	sp|Q41350|OLP1_SOLLC Osmotin-like protein OS=Solanum lycopersicum PE=1 SV=1//7.20143e-110
Dendrobium_GLEAN_10091209	89.8847	1087.21	-3.5964	4.9899e-08	2.8409e-05	sp|P16016|CAHC_SPIOL Carbonic anhydrase, chloroplastic OS=Spinacia oleracea PE=1 SV=2//1.47523e-44
Dendrobium_GLEAN_10091607	6.83378	238.565	-5.1256	0.0001052	0.013427	sp|Q05349|12KD_FRAAN Auxin-repressed 12.5 kDa protein OS=Fragaria ananassa PE=2 SV=1//1.28224e-27
Dendrobium_GLEAN_10091677	0	65.4775	#NAME?	0.00023446	0.024446	sp|Q9SIC9|PP178_ARATH Pentatricopeptide repeat-containing protein At2g31400, chloroplastic OS=Arabidopsis thaliana GN=At2g31400 PE=2 SV=1//2.18223e-06
Dendrobium_GLEAN_10091816	5934.92	834.259	2.8307	4.1298e-05	0.0067025	sp|Q9FLE8|Y5986_ARATH Uncharacterized protein At5g39865 OS=Arabidopsis thaliana GN=At5g39865 PE=2 SV=1//3.01191e-17
Dendrobium_GLEAN_10091825	351.286	9.02114	5.2832	7.3567e-09	6.4357e-06	sp|Q9LT69|SERA3_ARATH D-3-phosphoglycerate dehydrogenase 3, chloroplastic OS=Arabidopsis thaliana GN=PGDH3 PE=1 SV=1//2.00335e-55
Dendrobium_GLEAN_10091976	2149.39	2.37856	9.8196	7.2746e-05	0.010174	-//-
Dendrobium_GLEAN_10092575	96.6988	2286.04	-4.5632	3.2442e-12	9.0134e-09	sp|P31691|ADT_ORYSJ ADP,ATP carrier protein, mitochondrial OS=Oryza sativa subsp. japonica GN=Os02g0718900 PE=2 SV=1//0
Dendrobium_GLEAN_10092865	1313.02	267.817	2.2936	0.00044522	0.038572	sp|O22307|C71DB_LOTJA Cytochrome P450 71D11 (Fragment) OS=Lotus japonicus GN=CYP71D11 PE=2 SV=1//1.95638e-86
Dendrobium_GLEAN_10093328	879.159	135.032	2.7028	3.9448e-05	0.006567	-//-
Dendrobium_GLEAN_10093479	866.414	6526.67	-2.9132	3.4535e-07	0.00014075	sp|Q39219|AOX1A_ARATH Ubiquinol oxidase 1a, mitochondrial OS=Arabidopsis thaliana GN=AOX1A PE=1 SV=2//1.2466e-164
Dendrobium_GLEAN_10094362	4214.1	855.026	2.3012	9.4149e-05	0.012461	sp|P27608|AROF_TOBAC Phospho-2-dehydro-3-deoxyheptonate aldolase 1, chloroplastic OS=Nicotiana tabacum GN=DHAPS-1 PE=2 SV=1//0
Dendrobium_GLEAN_10095332	0	122.442	#NAME?	5.129e-05	0.0077621	-//-
Dendrobium_GLEAN_10095507	1938.46	363.19	2.4161	2.9813e-05	0.0052675	sp|Q500U8|TKPR1_ARATH Tetraketide alpha-pyrone reductase 1 OS=Arabidopsis thaliana GN=TKPR1 PE=1 SV=1//7.3588e-31
Dendrobium_GLEAN_10096238	35.4446	611.691	-4.1092	7.6679e-08	4.1049e-05	sp|Q9SYG1|HS174_ARATH 17.4 kDa class III heat shock protein OS=Arabidopsis thaliana GN=HSP17.4B PE=2 SV=1//3.23579e-27
Dendrobium_GLEAN_10096612	2.11972	93.8209	-5.468	0.00033544	0.031496	sp|Q40168|AG_SOLLC Floral homeotic protein AGAMOUS OS=Solanum lycopersicum GN=AG1 PE=2 SV=1//5.23728e-108
Dendrobium_GLEAN_10096781	3119.32	683.815	2.1896	0.00028051	0.027572	sp|P92973|CCA1_ARATH Protein CCA1 OS=Arabidopsis thaliana GN=CCA1 PE=1 SV=1//5.76964e-19
Dendrobium_GLEAN_10096782	7781.36	1584.13	2.2963	6.4294e-05	0.0092612	sp|Q6R0H1|LHY_ARATH Protein LHY OS=Arabidopsis thaliana GN=LHY PE=1 SV=2//1.17726e-12
Dendrobium_GLEAN_10097028	139.659	7.38224	4.2417	0.00049383	0.041481	sp|A7LXU3|BGH3B_BACO1 Beta-glucosidase BoGH3B OS=Bacteroides ovatus (strain ATCC 8483 / DSM 1896 / JCM 5824 / NCTC 11153) GN=BACOVA_02659 PE=1 SV=1//5.68098e-70
Dendrobium_GLEAN_10097549	199.307	0	Inf	1.74e-05	0.0033021	sp|Q06215|PPO_VICFA Polyphenol oxidase A1, chloroplastic OS=Vicia faba PE=1 SV=1//4.99925e-130
Dendrobium_GLEAN_10097553	245.35	1.54462	7.3115	2.1861e-06	0.00062409	sp|P43309|PPO_MALDO Polyphenol oxidase, chloroplastic OS=Malus domestica PE=2 SV=1//1.05326e-142
Dendrobium_GLEAN_10097774	4999.86	915.121	2.4499	3.5987e-05	0.0062055	sp|Q9C8M9|SRF6_ARATH Protein STRUBBELIG-RECEPTOR FAMILY 6 OS=Arabidopsis thaliana GN=SRF6 PE=1 SV=1//1.08064e-92
Dendrobium_GLEAN_10097780	3032.06	546.752	2.4713	4.8083e-05	0.007531	sp|Q9C8M9|SRF6_ARATH Protein STRUBBELIG-RECEPTOR FAMILY 6 OS=Arabidopsis thaliana GN=SRF6 PE=1 SV=1//4.10329e-131
Dendrobium_GLEAN_10097895	4271.36	1034.24	2.0461	0.00040513	0.036057	sp|Q8L850|PI5K9_ARATH Phosphatidylinositol 4-phosphate 5-kinase 9 OS=Arabidopsis thaliana GN=PIP5K9 PE=1 SV=2//0
Dendrobium_GLEAN_10098416	396.95	1788.22	-2.1715	0.00022835	0.024089	-//-
Dendrobium_GLEAN_10098543	899.006	34.21	4.7158	6.1354e-09	5.5015e-06	sp|Q5H7P5|EBM_LILLO Mannosylglycoprotein endo-beta-mannosidase OS=Lilium longiflorum GN=EBM PE=1 SV=4//2.84247e-32
Dendrobium_GLEAN_10098712	289.272	1314.24	-2.1837	0.00042023	0.036846	sp|O23210|SCL15_ARATH Scarecrow-like protein 15 OS=Arabidopsis thaliana GN=SCL15 PE=2 SV=3//1.15338e-52
Dendrobium_GLEAN_10099800	258.095	0	Inf	1.0609e-11	2.5367e-08	-//-
Dendrobium_GLEAN_10100157	342.868	1609.51	-2.2309	0.0001717	0.019612	sp|Q69XJ0|SPX1_ORYSJ SPX domain-containing protein 1 OS=Oryza sativa subsp. japonica GN=SPX1 PE=2 SV=1//6.67974e-103
Dendrobium_GLEAN_10100250	19235.1	3775.38	2.349	0.00017608	0.020049	sp|Q52QH4|NAC68_ORYSJ NAC domain-containing protein 68 OS=Oryza sativa subsp. japonica GN=NAC68 PE=2 SV=1//2.84233e-115
Dendrobium_GLEAN_10100317	1310.25	190.082	2.7852	3.2893e-05	0.005755	sp|Q9LXD9|PME51_ARATH Probable pectinesterase/pectinesterase inhibitor 51 OS=Arabidopsis thaliana GN=PME51 PE=2 SV=1//7.66309e-93
Dendrobium_GLEAN_10101282	980.568	60.521	4.0181	1.2257e-08	9.159e-06	-//-
Dendrobium_GLEAN_10101413	432.508	65.008	2.734	0.00035061	0.032578	sp|Q0WVN5|CSLG3_ARATH Cellulose synthase-like protein G3 OS=Arabidopsis thaliana GN=CSLG3 PE=2 SV=2//2.09931e-32
Dendrobium_GLEAN_10101415	1169.93	137.59	3.088	1.2709e-05	0.00252	sp|Q0WVN5|CSLG3_ARATH Cellulose synthase-like protein G3 OS=Arabidopsis thaliana GN=CSLG3 PE=2 SV=2//0
Dendrobium_GLEAN_10102127	12.4739	625.281	-5.6475	9.1475e-05	0.012152	sp|Q9LZK5|DNJ19_ARATH DnaJ protein ERDJ3B OS=Arabidopsis thaliana GN=ERDJ3B PE=1 SV=1//3.37502e-37
Dendrobium_GLEAN_10102803	39.0667	536.328	-3.7791	7.3502e-07	0.00025555	sp|Q9SJM1|ACR10_ARATH ACT domain-containing protein ACR10 OS=Arabidopsis thaliana GN=ACR10 PE=2 SV=1//1.9294e-162
Dendrobium_GLEAN_10103166	0.474618	268.13	-9.142	2.7951e-11	5.8972e-08	sp|Q945B6|AOP1L_ARATH Probable 2-oxoglutarate-dependent dioxygenase AOP1.2 OS=Arabidopsis thaliana GN=AOP1.2 PE=2 SV=1//4.63733e-52
Dendrobium_GLEAN_10103799	1505.17	184.444	3.0287	5.307e-06	0.0013405	sp|Q40161|GP1_SOLLC Polygalacturonase-1 non-catalytic subunit beta OS=Solanum lycopersicum GN=GP1 PE=1 SV=1//0
Dendrobium_GLEAN_10104225	124.84	779.585	-2.6426	5.7871e-05	0.0084721	sp|Q9SJ02|STEP2_ARATH Stress enhanced protein 2, chloroplastic OS=Arabidopsis thaliana GN=SEP2 PE=2 SV=1//2.06801e-52
Dendrobium_GLEAN_10104449	1238.38	138.455	3.161	1.1468e-05	0.002344	sp|Q6ZA27|BURPC_ORYSJ BURP domain-containing protein 12 OS=Oryza sativa subsp. japonica GN=BURP12 PE=2 SV=1//0
Dendrobium_GLEAN_10104452	1933.05	111.464	4.1162	1.7316e-10	3.1054e-07	sp|Q6ZA27|BURPC_ORYSJ BURP domain-containing protein 12 OS=Oryza sativa subsp. japonica GN=BURP12 PE=2 SV=1//0
Dendrobium_GLEAN_10105519	0	107.064	#NAME?	2.5789e-06	0.00069635	sp|Q9M7Q4|AI5L5_ARATH ABSCISIC ACID-INSENSITIVE 5-like protein 5 OS=Arabidopsis thaliana GN=ABF2 PE=1 SV=1//2.37107e-67
Dendrobium_GLEAN_10106010	632.76	30.3104	4.3838	2.0584e-08	1.3672e-05	sp|Q19KC1|NIP21_MAIZE Aquaporin NIP2-1 OS=Zea mays GN=NIP2-1 PE=2 SV=2//1.46617e-39
Dendrobium_GLEAN_10106086	675.193	84.5695	2.9971	5.0384e-05	0.0076909	sp|Q69RG7|4CLL7_ORYSJ 4-coumarate--CoA ligase-like 7 OS=Oryza sativa subsp. japonica GN=4CLL7 PE=2 SV=1//1.22567e-40
Dendrobium_GLEAN_10107666	2126.14	230.367	3.2062	3.0811e-07	0.00012702	sp|O48651|ERG1_PANGI Squalene monooxygenase OS=Panax ginseng PE=2 SV=1//0
Dendrobium_GLEAN_10108127	13.589	193.139	-3.8291	0.00014983	0.017854	sp|Q8LF20|CAP2_ARATH Putative clathrin assembly protein At2g25430 OS=Arabidopsis thaliana GN=At2g25430 PE=1 SV=2//7.64828e-84
Dendrobium_GLEAN_10108174	226.833	21.0191	3.4319	0.000455	0.039136	sp|Q9CAU1|SCP3_ARATH Serine carboxypeptidase-like 3 OS=Arabidopsis thaliana GN=SCPL3 PE=2 SV=1//1.40657e-48
Dendrobium_GLEAN_10108736	1178.94	7860.16	-2.7371	1.5394e-06	0.00047192	-//-
Dendrobium_GLEAN_10109125	5726.98	1270.06	2.1729	0.00024732	0.025428	sp|O64481|SBT25_ARATH Subtilisin-like protease SBT2.5 OS=Arabidopsis thaliana GN=SBT2.5 PE=2 SV=1//8.39597e-45
Dendrobium_GLEAN_10109129	4857.53	1179.83	2.0416	0.00057964	0.045991	sp|O64481|SBT25_ARATH Subtilisin-like protease SBT2.5 OS=Arabidopsis thaliana GN=SBT2.5 PE=2 SV=1//6.02961e-179
Dendrobium_GLEAN_10109220	36.4813	412.905	-3.5006	1.1421e-05	0.002344	-//-
Dendrobium_GLEAN_10109493	1297.7	211.614	2.6165	5.3461e-05	0.008023	sp|Q7DM58|AB4C_ARATH ABC transporter C family member 4 OS=Arabidopsis thaliana GN=ABCC4 PE=2 SV=2//0
Dendrobium_GLEAN_10109500	1980.27	456.664	2.1165	0.00050788	0.042167	sp|Q9LZJ5|AB14C_ARATH ABC transporter C family member 14 OS=Arabidopsis thaliana GN=ABCC14 PE=1 SV=1//5.29548e-09
Dendrobium_GLEAN_10110319	8283.28	1527.98	2.4386	0.00020354	0.022257	sp|Q9LSQ6|PBP1_ARATH Calcium-binding protein PBP1 OS=Arabidopsis thaliana GN=PBP1 PE=1 SV=1//1.42234e-23
Dendrobium_GLEAN_10110627	796.802	38.2564	4.3804	7.0986e-07	0.00024998	sp|Q9AR73|HQGT_RAUSE Hydroquinone glucosyltransferase OS=Rauvolfia serpentina GN=AS PE=1 SV=1//7.71289e-124
Dendrobium_GLEAN_10110847	13.0591	305.366	-4.5474	8.4584e-07	0.0002758	-//-
Dendrobium_GLEAN_10113293	6780.62	834.671	3.0221	3.5893e-07	0.00014147	sp|Q9SHH6|GSTUO_ARATH Glutathione S-transferase U24 OS=Arabidopsis thaliana GN=GSTU24 PE=2 SV=1//6.41025e-72
Dendrobium_GLEAN_10113497	464.836	20.6257	4.4942	0.00056151	0.045156	sp|Q8RYJ8|CML19_ORYSJ Putative calcium-binding protein CML19 OS=Oryza sativa subsp. japonica GN=CML19 PE=3 SV=1//2.11463e-28
Dendrobium_GLEAN_10113681	1032.08	0	Inf	6.8712e-06	0.00159	sp|Q3EBF7|SLD2_ARATH Delta(8)-fatty-acid desaturase 2 OS=Arabidopsis thaliana GN=SLD2 PE=1 SV=1//0
Dendrobium_GLEAN_10113992	503.632	66.3169	2.9249	0.0001367	0.016598	sp|Q9C9N5|Y1668_ARATH Probable inactive leucine-rich repeat receptor-like protein kinase At1g66830 OS=Arabidopsis thaliana GN=At1g66830 PE=2 SV=1//2.43973e-61
Dendrobium_GLEAN_10113993	999.573	145.948	2.7759	4.0259e-05	0.0066236	sp|Q9C9N5|Y1668_ARATH Probable inactive leucine-rich repeat receptor-like protein kinase At1g66830 OS=Arabidopsis thaliana GN=At1g66830 PE=2 SV=1//4.00163e-143
Dendrobium_GLEAN_10115482	1747.23	6619.6	-1.9217	0.00043137	0.037553	sp|Q94F47|UBC28_ARATH Ubiquitin-conjugating enzyme E2 28 OS=Arabidopsis thaliana GN=UBC28 PE=2 SV=1//2.07521e-83
Dendrobium_GLEAN_10115751	11072.9	798.301	3.794	1.0483e-09	1.175e-06	sp|P83948|PME3_CITSI Pectinesterase 3 OS=Citrus sinensis PE=1 SV=1//0
Dendrobium_GLEAN_10115967	2944.99	642.114	2.1974	0.00062966	0.049253	sp|Q9ZR02|CML6_ARATH Calmodulin-like protein 6 OS=Arabidopsis thaliana GN=CML6 PE=2 SV=1//1.54767e-36
Dendrobium_GLEAN_10116065	1736.35	108.777	3.9966	3.4927e-07	0.00014075	-//-
Dendrobium_GLEAN_10116086	627.747	3300.95	-2.3946	2.3807e-05	0.0043125	sp|O82316|TIP41_ARATH Aquaporin TIP4-1 OS=Arabidopsis thaliana GN=TIP4-1 PE=2 SV=1//1.94621e-54
Dendrobium_GLEAN_10116331	1931.67	482.142	2.0023	0.00022244	0.023773	sp|O64733|U87A2_ARATH UDP-glycosyltransferase 87A2 OS=Arabidopsis thaliana GN=UGT87A2 PE=1 SV=1//5.65226e-37
Dendrobium_GLEAN_10116381	19.6484	391.694	-4.3172	4.7307e-07	0.00018245	sp|Q6H5X0|RIP2_ORYSJ Putative ripening-related protein 2 OS=Oryza sativa subsp. japonica GN=Os02g0637000 PE=3 SV=1//2.45681e-63
Dendrobium_GLEAN_10116811	101115	13858.8	2.8671	2.2363e-05	0.0040924	sp|P27495|CB24_TOBAC Chlorophyll a-b binding protein 40, chloroplastic OS=Nicotiana tabacum GN=CAB40 PE=2 SV=1//4.5869e-169
Dendrobium_GLEAN_10117171	1910.18	10.1542	7.5555	8.3726e-05	0.011375	sp|Q9LZR3|CSLA9_ARATH Glucomannan 4-beta-mannosyltransferase 9 OS=Arabidopsis thaliana GN=CSLA9 PE=2 SV=1//5.38751e-69
Dendrobium_GLEAN_10117358	355.628	47.2358	2.9124	0.00046495	0.039706	sp|P12459|TBB1_SOYBN Tubulin beta-1 chain OS=Glycine max GN=TUBB1 PE=3 SV=1//1.71431e-86
Dendrobium_GLEAN_10117360	1360.59	219.277	2.6334	4.8401e-05	0.0075478	sp|P18025|TBB1_MAIZE Tubulin beta-1 chain OS=Zea mays GN=TUBB1 PE=2 SV=1//0
Dendrobium_GLEAN_10117452	893.94	151.34	2.5624	0.00015728	0.018435	sp|P24465|C71A1_PERAE Cytochrome P450 71A1 OS=Persea americana GN=CYP71A1 PE=1 SV=2//1.8538e-145
Dendrobium_GLEAN_10119641	185.174	14.2478	3.7001	0.00053312	0.04368	sp|P51091|LDOX_MALDO Leucoanthocyanidin dioxygenase OS=Malus domestica GN=ANS PE=2 SV=1//5.52281e-42
Dendrobium_GLEAN_10119643	583.879	43.5067	3.7464	8.6561e-05	0.011672	sp|O04274|LDOX_PERFR Leucoanthocyanidin dioxygenase OS=Perilla frutescens GN=ANS PE=2 SV=1//1.34525e-62
Dendrobium_GLEAN_10121183	587.273	87.6587	2.7441	0.00025595	0.02586	sp|Q9SCV8|BGAL4_ARATH Beta-galactosidase 4 OS=Arabidopsis thaliana GN=BGAL4 PE=1 SV=1//0
Dendrobium_GLEAN_10124156	219.434	21.4252	3.3564	0.0001987	0.021929	sp|Q76MV0|H32_TOBAC Histone H3.2 OS=Nicotiana tabacum GN=B34 PE=1 SV=1//5.8689e-92
Dendrobium_GLEAN_10124524	630.693	74.6927	3.0779	1.7396e-05	0.0033021	sp|Q8GT41|PLA1_PLAAC Putative invertase inhibitor OS=Platanus acerifolia PE=1 SV=1//2.58942e-14
Dendrobium_GLEAN_10125062	2170.64	28710.8	-3.7254	4.6262e-05	0.0073419	sp|Q8H1H9|AMO_ARATH Primary amine oxidase OS=Arabidopsis thaliana GN=At1g62810 PE=2 SV=1//0
Dendrobium_GLEAN_10125209	1998.55	216.645	3.2055	8.2727e-07	0.00027222	sp|Q9XIA9|LACS2_ARATH Long chain acyl-CoA synthetase 2 OS=Arabidopsis thaliana GN=LACS2 PE=2 SV=1//1.84455e-90
Dendrobium_GLEAN_10125412	1572.14	321.858	2.2882	0.00037354	0.033832	sp|Q8H930|ARAE1_ORYSJ Probable UDP-arabinose 4-epimerase 1 OS=Oryza sativa subsp. japonica GN=UEL-1 PE=2 SV=2//0
Dendrobium_GLEAN_10126257	474.002	2069.74	-2.1265	0.00037149	0.033832	sp|Q9SZ67|WRK19_ARATH Probable WRKY transcription factor 19 OS=Arabidopsis thaliana GN=WRKY19 PE=2 SV=1//1.25283e-34
Dendrobium_GLEAN_10127099	928.923	196.721	2.2394	0.00058086	0.045991	sp|Q8S7W0|CSLA4_ORYSJ Probable mannan synthase 4 OS=Oryza sativa subsp. japonica GN=CSLA4 PE=2 SV=1//7.99647e-84
Dendrobium_GLEAN_10127101	15329.1	778.444	4.2995	0.00048949	0.041212	sp|Q9LZR3|CSLA9_ARATH Glucomannan 4-beta-mannosyltransferase 9 OS=Arabidopsis thaliana GN=CSLA9 PE=2 SV=1//0
Dendrobium_GLEAN_10127837	414.362	24.7718	4.0641	2.3174e-06	0.00064433	sp|Q9SUC9|UGPI7_ARATH Uncharacterized GPI-anchored protein At4g28100 OS=Arabidopsis thaliana GN=At4g28100 PE=1 SV=1//1.95607e-33
Dendrobium_GLEAN_10128775	730.497	122.374	2.5776	0.00023954	0.024831	sp|Q8LPR5|TCP4_ARATH Transcription factor TCP4 OS=Arabidopsis thaliana GN=TCP4 PE=1 SV=1//3.71103e-54
Dendrobium_GLEAN_10129603	1674.38	371.406	2.1726	0.00018911	0.02113	sp|Q94KL5|BLH4_ARATH BEL1-like homeodomain protein 4 OS=Arabidopsis thaliana GN=BLH4 PE=1 SV=2//8.5618e-96
Dendrobium_GLEAN_10130895	23481.1	1710.07	3.7794	4.9157e-10	6.0797e-07	sp|Q6ZA27|BURPC_ORYSJ BURP domain-containing protein 12 OS=Oryza sativa subsp. japonica GN=BURP12 PE=2 SV=1//0
Dendrobium_GLEAN_10131100	570.877	63.5268	3.1677	4.0829e-05	0.0066564	-//-
Dendrobium_GLEAN_10131499	2374.79	257.436	3.2055	2.4957e-07	0.00010785	sp|Q9FZ45|Y1686_ARATH Uncharacterized membrane protein At1g16860 OS=Arabidopsis thaliana GN=At1g16860 PE=1 SV=1//8.40062e-13
Dendrobium_GLEAN_10131785	2966.34	318.352	3.22	9.985e-08	5.0282e-05	sp|Q8S7E1|CAO_ORYSJ Chlorophyllide a oxygenase, chloroplastic OS=Oryza sativa subsp. japonica GN=CAO PE=2 SV=1//0
Dendrobium_GLEAN_10132506	25705.2	4736.85	2.4401	0.00031064	0.029951	sp|Q688R3|C3H33_ORYSJ Zinc finger CCCH domain-containing protein 33 OS=Oryza sativa subsp. japonica GN=Os05g0128200 PE=2 SV=1//8.79402e-156
Dendrobium_GLEAN_10133146	13144.4	893.347	3.8791	3.8723e-10	5.3418e-07	sp|Q9FF86|DCR_ARATH BAHD acyltransferase DCR OS=Arabidopsis thaliana GN=DCR PE=2 SV=1//6.15e-138
Dendrobium_GLEAN_10135306	9346.4	496.688	4.234	0.00010508	0.013427	sp|Q9LZ31|C77A4_ARATH Cytochrome P450 77A4 OS=Arabidopsis thaliana GN=CYP77A4 PE=2 SV=1//0
Dendrobium_GLEAN_10136543	858.319	48.2402	4.1532	1.662e-08	1.1464e-05	sp|Q9ZRA4|AB19A_PRUPE Auxin-binding protein ABP19a OS=Prunus persica GN=ABP19A PE=3 SV=1//1.48925e-78
Dendrobium_GLEAN_10137100	385.939	53.5086	2.8505	0.00032345	0.030854	sp|Q0D3J9|C3H53_ORYSJ Zinc finger CCCH domain-containing protein 53 OS=Oryza sativa subsp. japonica GN=Os07g0682400 PE=2 SV=1//6.05766e-06
Dendrobium_GLEAN_10137101	3661.94	886.345	2.0467	0.00035903	0.033189	sp|Q10LZ9|C3H23_ORYSJ Zinc finger CCCH domain-containing protein 23 OS=Oryza sativa subsp. japonica GN=Os03g0329200 PE=2 SV=1//4.91072e-119
Dendrobium_GLEAN_10138041	1470.48	323.04	2.1865	0.00020833	0.022643	sp|Q9LEY1|SCP35_ARATH Serine carboxypeptidase-like 35 OS=Arabidopsis thaliana GN=SCPL35 PE=2 SV=1//0
Dendrobium_GLEAN_10138193	500.539	2335.79	-2.2224	0.00018051	0.020424	sp|Q851F9|EGY3_ORYSJ Probable zinc metalloprotease EGY3, chloroplastic OS=Oryza sativa subsp. japonica GN=EGY3 PE=2 SV=1//0
Dendrobium_GLEAN_10138752	949.228	142.03	2.7406	7.0046e-05	0.0098523	sp|P81392|MYB06_ANTMA Myb-related protein 306 OS=Antirrhinum majus GN=MYB306 PE=2 SV=1//2.54151e-101
Dendrobium_GLEAN_10140901	2112.02	479.2	2.1399	0.00062761	0.049253	sp|Q41140|PFPA_RICCO Pyrophosphate--fructose 6-phosphate 1-phosphotransferase subunit alpha OS=Ricinus communis GN=PFP-ALPHA PE=3 SV=1//5.27552e-55
Dendrobium_GLEAN_10142218	140.471	1045.62	-2.896	7.1671e-06	0.0016373	sp|Q42602|C89A2_ARATH Cytochrome P450 89A2 OS=Arabidopsis thaliana GN=CYP89A2 PE=2 SV=2//8.47501e-140
Dendrobium_GLEAN_10144924	580.867	19.0521	4.9302	1.1222e-09	1.2197e-06	sp|Q9FVS9|C96AF_ARATH Alkane hydroxylase MAH1 OS=Arabidopsis thaliana GN=CYP96A15 PE=2 SV=1//6.1145e-29
Dendrobium_GLEAN_10144925	1955	123.921	3.9797	5.7615e-10	6.8882e-07	sp|Q9FVS9|C96AF_ARATH Alkane hydroxylase MAH1 OS=Arabidopsis thaliana GN=CYP96A15 PE=2 SV=1//1.81595e-91
Novel00022	265.837	22.3171	3.5743	0.00022707	0.024045	--	hypothetical protein EUTSA_v10016785mg [Eutrema salsugineum]>gi|557111720|gb|ESQ52004.1| hypothetical protein EUTSA_v10016785mg [Eutrema salsugineum]
Novel00148	0	64.8666	#NAME?	0.00029928	0.02909	--	PREDICTED: uncharacterized protein LOC103494142 [Cucumis melo]
Novel00183	779.761	2.91881	8.0615	0.00056071	0.045156	--	mannosyltransferase [Dendrobium catenatum]
Novel00307	7.11926	206.529	-4.8585	6.5182e-06	0.0015433	--	PREDICTED: uncharacterized protein LOC103705547 isoform X1 [Phoenix dactylifera]>gi|672128090|ref|XP_008787524.1| PREDICTED: uncharacterized protein LOC103705547 isoform X1 [Phoenix dactylifera]>gi|672128092|ref|XP_008787525.1| PREDICTED: uncharacterized protein LOC103705547 isoform X1 [Phoenix dactylifera]>gi|672128094|ref|XP_008787526.1| PREDICTED: uncharacterized protein LOC103705547 isoform X…
Novel00309	0	135.125	#NAME?	1.0855e-06	0.00034151	-//-
Novel00317	0	392.276	#NAME?	0.00018276	0.020614	--	PREDICTED: probable galactinol--sucrose galactosyltransferase 6 [Musa acuminata subsp. malaccensis]
Novel00355	14.838	222.187	-3.9044	4.8908e-05	0.0075611	--	PREDICTED: 70 kDa peptidyl-prolyl isomerase-like [Oryza brachyantha]
Novel00417	100.39	1.39777	6.1664	0.00012018	0.014813	--	hypothetical protein VITISV_044371 [Vitis vinifera]
Novel00446	1098.86	9480.94	-3.109	1.0002e-07	5.0282e-05	-//-
Novel00475	80.6725	0	Inf	4.738e-05	0.0074863	--	PREDICTED: uncharacterized protein LOC103968373 [Musa acuminata subsp. malaccensis]
Novel00501	92.8377	0	Inf	1.2717e-05	0.00252	--	PREDICTED: uncharacterized protein LOC103701628 isoform X2 [Phoenix dactylifera]
Novel00603	2.00909	158.176	-6.2988	1.0404e-05	0.0021951	--	PREDICTED: zeaxanthin epoxidase, chloroplastic-like [Elaeis guineensis]
Novel00624	1.05986	104.591	-6.6247	3.3769e-05	0.0058796	--	PREDICTED: DNA replication licensing factor MCM2 [Phoenix dactylifera]
Novel00814	942.902	5438.64	-2.5281	0.00053787	0.043745	--	unnamed protein product [Vitis vinifera]
Novel00837	0.52993	342.473	-9.336	4.368e-13	1.4243e-09	--	PREDICTED: probable aldo-keto reductase 2 [Elaeis guineensis]
Novel00889	0	64.591	#NAME?	0.00027682	0.027427	-//-
Novel01091	371.7	3212.23	-3.1114	8.8961e-08	4.6243e-05	-//-
Novel01179	693.13	101.584	2.7705	0.00018619	0.020899	-//-
Novel01201	0	142.89	#NAME?	8.0564e-08	4.2494e-05	-//-
Novel01298	253.919	2907.74	-3.5175	1.3449e-08	9.6477e-06	-//-
Novel01309	22.4962	248.899	-3.4678	0.0001985	0.021929	--	putative RNA-directed DNA polymerase (Reverse transcriptase) [Malus domestica]
Novel01397	14439.6	1304.86	3.4681	1.395e-07	6.7068e-05	-//-
Novel01495	14.3081	282.797	-4.3049	2.9581e-06	0.0007859	--	PREDICTED: uncharacterized protein LOC101261386 [Solanum lycopersicum]
Novel01603	439.06	64.4315	2.7686	0.00049859	0.041639	--	RecName: Full=Beta-galactosidase; Short=Lactase; Flags: Precursor [Asparagus officinalis]>gi|452712|emb|CAA54525.1| beta-galactosidase [Asparagus officinalis]
Novel01760	0	94.1744	#NAME?	1.291e-05	0.0025442	--	PREDICTED: uncharacterized protein LOC103722988 [Phoenix dactylifera]
Novel02190	38.08	320.524	-3.0733	0.0002469	0.025428	--	hypothetical protein PRUPE_ppa017790mg [Prunus persica]>gi|462405925|gb|EMJ11389.1| hypothetical protein PRUPE_ppa017790mg [Prunus persica]
Novel02206	1096.75	4809.99	-2.1328	0.00015418	0.018215	-//-
Novel02425	96.7131	0.980795	6.6236	8.2814e-05	0.011294	--	PREDICTED: type I inositol 1,4,5-trisphosphate 5-phosphatase CVP2-like [Phoenix dactylifera]
Novel02495	174.29	4.61028	5.2405	0.0001038	0.013392	--	Uncharacterized protein TCM_026877 [Theobroma cacao]>gi|508778198|gb|EOY25454.1| Uncharacterized protein TCM_026877 [Theobroma cacao]
Novel02510	1680.83	11950.9	-2.8299	9.0589e-07	0.00029257	--	PREDICTED: serine/arginine-rich splicing factor SR45a-like [Eucalyptus grandis]
Novel02538	22.3766	266.542	-3.5743	0.00037283	0.033832	--	PREDICTED: uncharacterized protein LOC103633072 [Zea mays]
Novel02557	352.498	2369.98	-2.7492	8.062e-06	0.0018186	-//-
Novel02563	80.3727	510.017	-2.6658	0.0002227	0.023773	--	hypothetical protein VITISV_005765 [Vitis vinifera]
Novel02611	109.173	2.50184	5.4475	0.00023174	0.024304	--	PREDICTED: autophagy-related protein 8i-like [Sesamum indicum]
Novel02612	57440.7	271967	-2.2433	4.4511e-05	0.0071516	-//-
Novel02696	0	145.919	#NAME?	5.0391e-05	0.0076909	--	PREDICTED: uncharacterized protein LOC103704710 isoform X3 [Phoenix dactylifera]
Novel02795	81.156	0.416973	7.6046	0.00015438	0.018215	-//-
Novel02886	8.76436	307.471	-5.1327	1.4478e-07	6.8328e-05	--	PREDICTED: probable amino acid permease 7 [Elaeis guineensis]
Novel02888	7.34051	330.773	-5.4938	1.3351e-08	9.6477e-06	--	Retrovirus-related Pol polyprotein from transposon TNT 1-94, partial [Glycine soja]
Novel02899	1473.18	1.25092	10.202	2.2512e-07	9.8469e-05	-//-
Novel03338	0.52993	111.898	-7.7222	6.6263e-06	0.0015433	-//-
Novel03359	168.726	7.79922	4.4352	0.00011678	0.014494	-//-
Novel03582	19685.3	1638.9	3.5863	1.7117e-09	1.7541e-06	--	PREDICTED: CAS1 domain-containing protein 1-like isoform X1 [Phoenix dactylifera]
Novel03589	162.064	3.38293	5.5821	4.5017e-06	0.0011533	--	PREDICTED: uncharacterized protein LOC105049063 [Elaeis guineensis]>gi|743803376|ref|XP_010926901.1| PREDICTED: uncharacterized protein LOC105049063 [Elaeis guineensis]>gi|743803380|ref|XP_010926902.1| PREDICTED: uncharacterized protein LOC105049063 [Elaeis guineensis]
Novel03620	10.488	152.933	-3.8661	0.00046455	0.039706	--	PREDICTED: LOW QUALITY PROTEIN: glucan endo-1,3-beta-glucosidase 1-like [Phoenix dactylifera]
Novel03641	1112.39	157.284	2.8222	1.6372e-05	0.0031402	--	PREDICTED: CSC1-like protein HYP1 [Musa acuminata subsp. malaccensis]
Novel03728	237.994	16.9726	3.8096	0.00011744	0.014525	--	PREDICTED: uncharacterized protein LOC105049841 [Elaeis guineensis]
Novel03816	138.301	1.66789	6.3736	9.7056e-06	0.0021002	--	hypothetical protein PRUPE_ppa017790mg [Prunus persica]>gi|462405925|gb|EMJ11389.1| hypothetical protein PRUPE_ppa017790mg [Prunus persica]
Novel03822	238.087	9.14442	4.7025	2.2056e-06	0.00062409	--	PREDICTED: ATP-dependent Clp protease proteolytic subunit-related protein 1, chloroplastic [Nelumbo nucifera]
Novel03823	0	106.062	#NAME?	0.00046122	0.039576	-//-
Novel04027	341.557	4.46343	6.2578	5.6616e-07	0.00020721	--	PREDICTED: catalase isozyme A-like isoform X2 [Musa acuminata subsp. malaccensis]
Novel04064	685.576	154.464	2.1501	0.00040977	0.03629	--	hypothetical protein OsJ_14506 [Oryza sativa Japonica Group]
Novel04102	415.572	63.3818	2.713	0.00025891	0.026085	--	PREDICTED: protein LIGHT-DEPENDENT SHORT HYPOCOTYLS 4 [Amborella trichopoda]>gi|548861392|gb|ERN18766.1| hypothetical protein AMTR_s00067p00052610 [Amborella trichopoda]
Novel04169	0	71.9261	#NAME?	0.00011253	0.014162	--	PREDICTED: UPF0047 protein C4A8.02c [Elaeis guineensis]
Novel04475	184.012	0	Inf	2.7097e-09	2.6267e-06	-//-
Novel04558	0	265.007	#NAME?	5.306e-12	1.3594e-08	--	PREDICTED: 40S ribosomal protein S12-like isoform X1 [Phoenix dactylifera]
Novel04626	208.553	0	Inf	3.392e-10	4.8665e-07	--	PREDICTED: uncharacterized protein LOC103431265 [Malus domestica]
Novel04778	174.345	9.14442	4.2529	0.00049804	0.041639	--	hypothetical protein OsJ_14506 [Oryza sativa Japonica Group]
Novel04844	17.4645	347.693	-4.3153	7.109e-07	0.00024998	--	PREDICTED: uncharacterized protein LOC103699270, partial [Phoenix dactylifera]
Novel04881	98.6026	995.338	-3.3355	9.5525e-05	0.01255	-//-
Novel04935	0.52993	75.7152	-7.1586	0.00030662	0.029643	--	PREDICTED: FK506-binding protein 2-like [Phoenix dactylifera]
Novel05005	0	114.307	#NAME?	1.5884e-06	0.0004828	-//-
Novel05088	182.813	10.495	4.1226	0.00011536	0.014416	--	PREDICTED: transcription factor TGA2-like isoform X2 [Nelumbo nucifera]
Novel05098	92.884	555.538	-2.5804	0.00020606	0.022464	-//-
Novel05163	10.5433	165.279	-3.9705	0.0004049	0.036057	--	PREDICTED: LOW QUALITY PROTEIN: putative disease resistance protein RGA3 [Phoenix dactylifera]
Novel05340	0	405.034	#NAME?	1.4024e-07	6.7068e-05	-//-
Novel05350	1072.74	4633.5	-2.1108	0.00015854	0.018523	--	putative RNA-directed DNA polymerase (Reverse transcriptase) [Malus domestica]
Novel05372	14.119	192.91	-3.7722	0.00019311	0.02151	-//-
Novel05376	1691.2	2.25529	9.5505	5.6162e-26	2.0144e-21	--	Strong similarity to gi|3600044 T12H20.12 protease homolog from Arabidopsis thaliana BAC gb|AF080119 and is a member of the reverse transcriptase family PF|00078 [Arabidopsis thaliana]
Novel05469	0	121.236	#NAME?	6.4118e-07	0.00022997	-//-
Novel05665	2.59434	239.474	-6.5284	5.1596e-07	0.0001948	--	PREDICTED: uncharacterized protein LOC103714165 isoform X1 [Phoenix dactylifera]
Novel05672	30.049	250.538	-3.0596	0.0006254	0.049191	-//-
Novel05677	79.659	0	Inf	5.4912e-05	0.0081724	--	unknown [Picea sitchensis]>gi|224286886|gb|ACN41146.1| unknown [Picea sitchensis]
Novel05702	19.9018	212.591	-3.4171	0.00045354	0.039103	--	PREDICTED: uncharacterized protein LOC103651381 isoform X2 [Zea mays]
Novel05851	444.452	3324.15	-2.9029	8.2491e-07	0.00027222	-//-
PEQU_07911-D2	1616.66	164.913	3.2932	0.00015322	0.018197	sp|Q6R0H1|LHY_ARATH Protein LHY OS=Arabidopsis thaliana GN=LHY PE=1 SV=2//1.88688e-18
PEQU_40816-D2	133.028	1061.26	-2.996	9.9845e-05	0.012975	sp|Q680K8|Y1576_ARATH BTB/POZ domain-containing protein At1g55760 OS=Arabidopsis thaliana GN=At1g55760 PE=2 SV=1//1.56254e-117

## Sheet: S2 vs S3
Gene_id	readcount_S2	readcount_S3	log2FoldChange	pval	padj	Blast swiss prot
Dendrobium_GLEAN_10001091	1839.78	515.858	1.8345	8.9071e-05	0.047817	-//-
Dendrobium_GLEAN_10014278	3123.04	510.076	2.6142	1.0188e-08	1.4439e-05	sp|Q7XJJ7|FAAH_ARATH Fatty acid amide hydrolase OS=Arabidopsis thaliana GN=FAAH PE=1 SV=1//1.20984e-150
Dendrobium_GLEAN_10017815	2775.7	120.364	4.5274	4.7661e-19	2.8146e-15	sp|Q9LMM1|C86A4_ARATH Cytochrome P450 86A4 OS=Arabidopsis thaliana GN=CYP86A4 PE=1 SV=1//1.35197e-111
Dendrobium_GLEAN_10019477	964.303	156.092	2.6271	5.0076e-07	0.00045494	sp|O49741|GATA2_ARATH GATA transcription factor 2 OS=Arabidopsis thaliana GN=GATA2 PE=2 SV=1//2.57577e-58
Dendrobium_GLEAN_10019621	93.9175	1295.72	-3.7862	1.3779e-10	2.5695e-07	-//-
Dendrobium_GLEAN_10019624	80.2568	1102.36	-3.7798	3.4027e-12	7.5353e-09	-//-
Dendrobium_GLEAN_10020342	220.299	16.9565	3.6996	1.7814e-05	0.011688	sp|Q9LHA1|C8D11_ARATH Cytochrome P450 81D11 OS=Arabidopsis thaliana GN=CYP81D11 PE=2 SV=1//1.60342e-08
Dendrobium_GLEAN_10020758	288.914	34.5451	3.0641	4.2733e-05	0.025663	sp|Q9FHM4|MA653_ARATH 65-kDa microtubule-associated protein 3 OS=Arabidopsis thaliana GN=MAP65-3 PE=1 SV=1//0
Dendrobium_GLEAN_10022656	1188.44	18.2437	6.0255	5.0511e-22	3.5794e-18	sp|Q9LU14|APG2_ARATH GDSL esterase/lipase APG OS=Arabidopsis thaliana GN=APG PE=1 SV=1//3.18953e-51
Dendrobium_GLEAN_10022657	1745.49	24.3673	6.1625	1.4489e-25	1.2834e-21	sp|Q9LU14|APG2_ARATH GDSL esterase/lipase APG OS=Arabidopsis thaliana GN=APG PE=1 SV=1//4.59159e-112
Dendrobium_GLEAN_10023953	2956.31	427.744	2.789	5.4944e-08	6.4892e-05	sp|Q8H1D6|RBK1_ARATH Receptor-like cytosolic serine/threonine-protein kinase RBK1 OS=Arabidopsis thaliana GN=RBK1 PE=1 SV=1//1.26638e-76
Dendrobium_GLEAN_10028744	3500.88	62.3733	5.8106	3.9864e-06	0.0032101	sp|Q9FF86|DCR_ARATH BAHD acyltransferase DCR OS=Arabidopsis thaliana GN=DCR PE=2 SV=1//1.62042e-89
Dendrobium_GLEAN_10030544	2.95438	1761.16	-9.2195	1.4828e-18	6.5672e-15	sp|Q8TGM7|ART2_YEAST Putative uncharacterized protein ART2 OS=Saccharomyces cerevisiae (strain ATCC 204508 / S288c) GN=ART2 PE=5 SV=1//1.84392e-17
Dendrobium_GLEAN_10031220	8794.48	1448.35	2.6022	1.319e-09	2.2254e-06	sp|Q8LF99|XTH6_ARATH Probable xyloglucan endotransglucosylase/hydrolase protein 6 OS=Arabidopsis thaliana GN=XTH6 PE=2 SV=2//9.65921e-125
Dendrobium_GLEAN_10031517	1200.04	4493.23	-1.9047	1.6097e-05	0.010968	sp|O22307|C71DB_LOTJA Cytochrome P450 71D11 (Fragment) OS=Lotus japonicus GN=CYP71D11 PE=2 SV=1//6.91543e-62
Dendrobium_GLEAN_10033115	758.843	112.761	2.7505	5.6571e-07	0.00050111	sp|P31687|4CL2_SOYBN 4-coumarate--CoA ligase 2 OS=Glycine max PE=2 SV=2//0
Dendrobium_GLEAN_10035158	10076.5	811.365	3.6345	5.6038e-16	1.9855e-12	sp|Q9S746|HTH_ARATH Protein HOTHEAD OS=Arabidopsis thaliana GN=HTH PE=1 SV=1//2.3664e-122
Dendrobium_GLEAN_10035159	2180.95	148.404	3.8774	9.2596e-15	2.9826e-11	sp|Q9S746|HTH_ARATH Protein HOTHEAD OS=Arabidopsis thaliana GN=HTH PE=1 SV=1//5.57039e-68
Dendrobium_GLEAN_10040737	1222.19	73.7959	4.0498	1.7597e-13	5.1959e-10	-//-
Dendrobium_GLEAN_10041168	5.92565	376.369	-5.989	8.0249e-13	1.8956e-09	sp|P0CC49|NU2C2_COFAR NAD(P)H-quinone oxidoreductase subunit 2 B, chloroplastic OS=Coffea arabica GN=ndhB2 PE=3 SV=1//4.39362e-101
Dendrobium_GLEAN_10041488	34.7367	282.615	-3.0243	9.4823e-05	0.049477	sp|Q9STK7|C71AQ_ARATH Cytochrome P450 71A26 OS=Arabidopsis thaliana GN=CYP71A26 PE=3 SV=1//1.07014e-72
Dendrobium_GLEAN_10044043	1087.68	4393.29	-2.014	8.9156e-06	0.006318	sp|Q7XWK5|SAG39_ORYSJ Senescence-specific cysteine protease SAG39 OS=Oryza sativa subsp. japonica GN=SAG39 PE=2 SV=2//2.72909e-117
Dendrobium_GLEAN_10044227	1811.09	531.653	1.7683	9.4955e-05	0.049477	-//-
Dendrobium_GLEAN_10048035	601.775	37.1655	4.0172	2.8886e-10	5.1175e-07	sp|Q8W4K5|VAB_ARATH VAN3-binding protein OS=Arabidopsis thaliana GN=VAB PE=1 SV=1//1.03022e-29
Dendrobium_GLEAN_10048036	653.488	70.1691	3.2193	4.6242e-08	5.8516e-05	sp|Q8W4K5|VAB_ARATH VAN3-binding protein OS=Arabidopsis thaliana GN=VAB PE=1 SV=1//7.81909e-25
Dendrobium_GLEAN_10049093	329.982	37.9672	3.1196	2.6103e-05	0.016226	sp|O49743|GATA4_ARATH GATA transcription factor 4 OS=Arabidopsis thaliana GN=GATA4 PE=2 SV=1//1.0042e-33
Dendrobium_GLEAN_10049312	7461.77	164.494	5.5034	3.3667e-28	5.9645e-24	sp|Q93VR4|ML423_ARATH MLP-like protein 423 OS=Arabidopsis thaliana GN=MLP423 PE=2 SV=1//2.17533e-41
Dendrobium_GLEAN_10049468	5926.92	1687.4	1.8125	1.6502e-05	0.011032	sp|Q43062|PME_PRUPE Pectinesterase/pectinesterase inhibitor PPE8B OS=Prunus persica PE=2 SV=1//0
Dendrobium_GLEAN_10049832	823.128	32.2638	4.6731	3.7912e-07	0.00036565	sp|Q8W453|DIRL1_ARATH Putative lipid-transfer protein DIR1 OS=Arabidopsis thaliana GN=DIR1 PE=1 SV=1//7.158e-11
Dendrobium_GLEAN_10051144	0	118.245	#NAME?	1.4026e-07	0.0001506	sp|Q8TGM7|ART2_YEAST Putative uncharacterized protein ART2 OS=Saccharomyces cerevisiae (strain ATCC 204508 / S288c) GN=ART2 PE=5 SV=1//1.48593e-19
Dendrobium_GLEAN_10053553	863.62	149.564	2.5296	2.1949e-06	0.0018517	sp|Q94BT9|ATOX1_ARATH Copper transport protein ATX1 OS=Arabidopsis thaliana GN=ATX1 PE=1 SV=1//4.62896e-09
Dendrobium_GLEAN_10053592	805.953	75.9803	3.407	1.7393e-09	2.8012e-06	sp|Q9C554|EXPA1_ARATH Expansin-A1 OS=Arabidopsis thaliana GN=EXPA1 PE=2 SV=1//1.70565e-132
Dendrobium_GLEAN_10055773	460.243	58.4498	2.9771	3.1137e-06	0.0025657	-//-
Dendrobium_GLEAN_10055856	2886.6	452.83	2.6723	8.1155e-09	1.1981e-05	sp|Q93Z25|PLY22_ARATH Probable pectate lyase 22 OS=Arabidopsis thaliana GN=At5g63180 PE=2 SV=1//0
Dendrobium_GLEAN_10059360	37128.2	11703.6	1.6656	4.7462e-05	0.028028	sp|Q9SB81|PER42_ARATH Peroxidase 42 OS=Arabidopsis thaliana GN=PER42 PE=1 SV=2//0
Dendrobium_GLEAN_10060223	274.513	2.51266	6.7715	2.0189e-11	4.2079e-08	-//-
Dendrobium_GLEAN_10060246	939.105	129.013	2.8638	1.2747e-07	0.00014114	sp|Q9LXD9|PME51_ARATH Probable pectinesterase/pectinesterase inhibitor 51 OS=Arabidopsis thaliana GN=PME51 PE=2 SV=1//1.58074e-168
Dendrobium_GLEAN_10060315	755.982	172.09	2.1352	6.5698e-05	0.036949	sp|Q8RWL0|E2FF_ARATH E2F transcription factor-like E2FF OS=Arabidopsis thaliana GN=E2FF PE=2 SV=1//6.795e-08
Dendrobium_GLEAN_10061242	86.2237	1.05592	6.3515	7.6966e-05	0.041955	sp|B9DHQ0|TBA5_ARATH Tubulin alpha-5 chain OS=Arabidopsis thaliana GN=TUBA5 PE=1 SV=2//4.43845e-56
Dendrobium_GLEAN_10065442	1516.96	116.76	3.6996	7.6772e-13	1.8956e-09	sp|Q8VY93|GDL66_ARATH GDSL esterase/lipase At4g26790 OS=Arabidopsis thaliana GN=At4g26790 PE=2 SV=1//4.16552e-80
Dendrobium_GLEAN_10065444	618.238	57.9255	3.4159	1.49e-08	2.0306e-05	sp|Q9SJB4|GDL34_ARATH GDSL esterase/lipase At2g04570 OS=Arabidopsis thaliana GN=At2g04570 PE=2 SV=1//2.87901e-43
Dendrobium_GLEAN_10066196	3970.13	849.516	2.2245	2.8296e-07	0.00029487	sp|Q0JKM9|MAN1_ORYSJ Mannan endo-1,4-beta-mannosidase 1 OS=Oryza sativa subsp. japonica GN=MAN1 PE=2 SV=2//0
Dendrobium_GLEAN_10069197	1975.89	342.419	2.5287	1.0268e-07	0.00011736	sp|Q9LHF1|LRX4_ARATH Leucine-rich repeat extensin-like protein 4 OS=Arabidopsis thaliana GN=LRX4 PE=2 SV=1//2.87935e-167
Dendrobium_GLEAN_10071202	12026.3	2886.04	2.059	4.5797e-06	0.0035087	sp|B5LZ79|DEF_GYMCO Defensin-like protein OS=Gymnadenia conopsea PE=1 SV=1//8.19132e-26
Dendrobium_GLEAN_10072077	566.674	113.647	2.318	4.8889e-05	0.028397	sp|Q54DY9|BCS1B_DICDI Probable mitochondrial chaperone BCS1-B OS=Dictyostelium discoideum GN=bcsl1b PE=3 SV=1//8.67822e-29
Dendrobium_GLEAN_10073097	366.729	30.0478	3.6094	4.6323e-07	0.00043193	-//-
Dendrobium_GLEAN_10074616	935.394	62.165	3.9114	6.535e-11	1.2864e-07	sp|Q8GU87|AB31G_ORYSJ ABC transporter G family member 31 OS=Oryza sativa subsp. japonica GN=ABCG31 PE=2 SV=3//3.0125e-07
Dendrobium_GLEAN_10079435	88.5468	863.656	-3.2859	6.5586e-09	1.0104e-05	sp|O04887|PME2_CITSI Pectinesterase 2 OS=Citrus sinensis GN=PECS-2.1 PE=2 SV=1//0
Dendrobium_GLEAN_10079875	1397.32	347.215	2.0088	2.381e-05	0.015065	sp|Q9ASU1|DGAT2_ARATH Diacylglycerol O-acyltransferase 2 OS=Arabidopsis thaliana GN=DGAT2 PE=2 SV=1//5.01156e-101
Dendrobium_GLEAN_10084654	7465.52	663.798	3.4914	3.8183e-07	0.00036565	sp|Q10RB4|BGAL5_ORYSJ Beta-galactosidase 5 OS=Oryza sativa subsp. japonica GN=Os03g0165400 PE=2 SV=1//0
Dendrobium_GLEAN_10094803	367.091	43.139	3.0891	7.1178e-06	0.0052541	sp|Q8TB40|ABHD4_HUMAN Abhydrolase domain-containing protein 4 OS=Homo sapiens GN=ABHD4 PE=2 SV=1//2.62459e-09
Dendrobium_GLEAN_10095198	2855.89	175.441	4.0249	2.323e-16	9.1455e-13	sp|Q944R1|PLY15_ARATH Probable pectate lyase 15 OS=Arabidopsis thaliana GN=At4g13710 PE=2 SV=1//0
Dendrobium_GLEAN_10097549	144.108	5.2796	4.7706	1.8391e-05	0.011848	sp|Q06215|PPO_VICFA Polyphenol oxidase A1, chloroplastic OS=Vicia faba PE=1 SV=1//4.99925e-130
Dendrobium_GLEAN_10106171	3.58567	1006.84	-8.1334	1.5534e-27	1.8347e-23	-//-
Dendrobium_GLEAN_10108558	735.528	170.028	2.113	6.7587e-05	0.037418	sp|Q9CAA9|BH049_ARATH Transcription factor bHLH49 OS=Arabidopsis thaliana GN=BHLH49 PE=1 SV=1//3.11349e-56
Dendrobium_GLEAN_10118883	2.95438	1336.71	-8.8216	2.246e-08	2.9474e-05	-//-
Dendrobium_GLEAN_10127101	3406.69	411.617	3.049	5.0577e-08	6.1795e-05	sp|Q9LZR3|CSLA9_ARATH Glucomannan 4-beta-mannosyltransferase 9 OS=Arabidopsis thaliana GN=CSLA9 PE=2 SV=1//0
Dendrobium_GLEAN_10130642	10772.9	3177.33	1.7615	3.0228e-05	0.018466	sp|Q570B4|KCS10_ARATH 3-ketoacyl-CoA synthase 10 OS=Arabidopsis thaliana GN=FDH PE=1 SV=2//4.20767e-91
Dendrobium_GLEAN_10130643	21853.2	5593.73	1.966	1.5966e-05	0.010968	sp|Q570B4|KCS10_ARATH 3-ketoacyl-CoA synthase 10 OS=Arabidopsis thaliana GN=FDH PE=1 SV=2//0
Dendrobium_GLEAN_10132549	222.555	21.0954	3.3992	5.5357e-05	0.031636	sp|Q9FQA3|GST23_MAIZE Glutathione transferase GST 23 OS=Zea mays PE=2 SV=1//1.32467e-46
Dendrobium_GLEAN_10133146	8493.47	323.78	4.7133	1.1299e-06	0.00097643	sp|Q9FF86|DCR_ARATH BAHD acyltransferase DCR OS=Arabidopsis thaliana GN=DCR PE=2 SV=1//6.15e-138
Dendrobium_GLEAN_10135306	5206.19	262.586	4.3094	6.3819e-19	3.2303e-15	sp|Q9LZ31|C77A4_ARATH Cytochrome P450 77A4 OS=Arabidopsis thaliana GN=CYP77A4 PE=2 SV=1//0
Dendrobium_GLEAN_10136748	572.516	94.9409	2.5922	8.0475e-06	0.0058192	sp|P54769|TYDC2_PAPSO Tyrosine/DOPA decarboxylase 2 OS=Papaver somniferum GN=TYDC2 PE=2 SV=1//0
Dendrobium_GLEAN_10139583	71.4018	4645.26	-6.0237	3.605e-30	1.2773e-25	sp|Q7Y618|YCX1_CALFG Uncharacterized 8.8 kDa protein in rps12-tRNA-Val intergenic region OS=Calycanthus floridus var. glaucus PE=4 SV=1//6.82668e-29
Dendrobium_GLEAN_10139584	456.516	4465.37	-3.29	3.5692e-13	9.7281e-10	-//-
Dendrobium_GLEAN_10140150	1391.76	293.49	2.2455	4.2881e-06	0.0033763	sp|Q9FJZ9|PER72_ARATH Peroxidase 72 OS=Arabidopsis thaliana GN=PER72 PE=1 SV=1//2.49608e-157
Novel00263	425.58	41.3698	3.3628	3.7571e-07	0.00036565	-//-
Novel04539	187.59	8.89056	4.3992	4.6543e-06	0.0035087	-//-

## Sheet: S2 vs S4
Gene_id	readcount_S2	readcount_S4	log2FoldChange	pval	padj	Blast swiss prot
Dendrobium_GLEAN_10000689	105.783	0.436173	7.922	3.6573e-05	0.0074748	-//-
Dendrobium_GLEAN_10000837	140.717	925.246	-2.717	6.9157e-05	0.012018	sp|Q8LC69|ATL8_ARATH RING-H2 finger protein ATL8 OS=Arabidopsis thaliana GN=ATL8 PE=2 SV=2//3.13818e-40
Dendrobium_GLEAN_10001091	1811.24	140.637	3.6869	3.9363e-08	2.5744e-05	-//-
Dendrobium_GLEAN_10001448	435.827	29.7457	3.873	7.9666e-06	0.0021691	sp|F4I9E1|NFD4_ARATH Protein NUCLEAR FUSION DEFECTIVE 4 OS=Arabidopsis thaliana GN=NFD4 PE=3 SV=1//8.46172e-49
Dendrobium_GLEAN_10002438	12.4389	236.97	-4.2518	4.6347e-05	0.0087661	sp|Q39134|AAP3_ARATH Amino acid permease 3 OS=Arabidopsis thaliana GN=AAP3 PE=1 SV=2//2.34993e-21
Dendrobium_GLEAN_10002743	2566.19	478.437	2.4232	6.0879e-05	0.010788	sp|Q8LEA8|EID1_ARATH Phytochrome A-associated F-box protein OS=Arabidopsis thaliana GN=EID1 PE=1 SV=2//1.80998e-122
Dendrobium_GLEAN_10002848	60.295	698.351	-3.5338	3.0888e-06	0.0010397	sp|Q9FN04|AAP4_ARATH Amino acid permease 4 OS=Arabidopsis thaliana GN=AAP4 PE=1 SV=1//3.19072e-20
Dendrobium_GLEAN_10007090	982.702	180.012	2.4487	0.0001935	0.026771	sp|Q9M2Z5|FBL53_ARATH F-box/LRR-repeat protein At3g48880 OS=Arabidopsis thaliana GN=At3g48880 PE=2 SV=1//2.7598e-26
Dendrobium_GLEAN_10007231	20.8611	422.994	-4.3417	8.7367e-06	0.0023108	sp|P51419|RL273_ARATH 60S ribosomal protein L27-3 OS=Arabidopsis thaliana GN=RPL27C PE=2 SV=2//1.65317e-76
Dendrobium_GLEAN_10009474	1887.37	396.823	2.2498	0.00015892	0.023434	sp|Q9LJR3|SPA3_ARATH Protein SPA1-RELATED 3 OS=Arabidopsis thaliana GN=SPA3 PE=1 SV=1//2.17707e-146
Dendrobium_GLEAN_10009705	208.48	1249.34	-2.5832	0.00011564	0.018284	sp|C0SVV6|CB60A_ARATH Calmodulin-binding protein 60 A OS=Arabidopsis thaliana GN=CBP60A PE=2 SV=1//5.23346e-39
Dendrobium_GLEAN_10010154	4.63669	225.911	-5.6065	9.9407e-07	0.00041101	sp|Q93X17|SNAK2_SOLTU Snakin-2 OS=Solanum tuberosum GN=SN2 PE=1 SV=1//6.43482e-23
Dendrobium_GLEAN_10010491	128.36	1467.63	-3.5152	1.6227e-07	8.2212e-05	sp|Q96303|PHT14_ARATH Inorganic phosphate transporter 1-4 OS=Arabidopsis thaliana GN=PHT1-4 PE=1 SV=1//0
Dendrobium_GLEAN_10010642	958.434	187.212	2.356	0.00039905	0.046212	sp|Q2QTC2|PWD_ORYSJ Phosphoglucan, water dikinase, chloroplastic OS=Oryza sativa subsp. japonica GN=GWD3 PE=3 SV=2//1.40098e-08
Dendrobium_GLEAN_10010728	6.07993	156.68	-4.6876	0.00015712	0.023355	sp|Q9FIW5|NAC94_ARATH Putative NAC domain-containing protein 94 OS=Arabidopsis thaliana GN=ANAC094 PE=3 SV=1//1.99543e-58
Dendrobium_GLEAN_10011954	21.4871	408.321	-4.2482	2.2539e-06	0.00082848	-//-
Dendrobium_GLEAN_10012117	199.952	6.14937	5.0231	1.3788e-05	0.0032629	sp|P05332|YP20_BACLI Uncharacterized N-acetyltransferase p20 OS=Bacillus licheniformis GN=p20 PE=3 SV=1//2.43747e-10
Dendrobium_GLEAN_10012764	681.54	3.66341	7.5395	5.4935e-15	2.4701e-11	sp|Q94DH3|PCL1_ORYSJ Transcription factor PCL1 OS=Oryza sativa subsp. japonica GN=PCL1 PE=2 SV=1//1.56112e-13
Dendrobium_GLEAN_10013397	242.165	0	Inf	2.0386e-10	3.1883e-07	-//-
Dendrobium_GLEAN_10013411	507.321	2946.59	-2.5381	3.8282e-05	0.007693	sp|Q9LZX1|LOR15_ARATH Protein LURP-one-related 15 OS=Arabidopsis thaliana GN=At5g01750 PE=1 SV=1//7.46028e-36
Dendrobium_GLEAN_10014058	0	376.699	#NAME?	7.1022e-14	2.3225e-10	sp|Q9SD39|PMTR_ARATH Probable methyltransferase PMT27 OS=Arabidopsis thaliana GN=At3g51070 PE=3 SV=1//3.73945e-64
Dendrobium_GLEAN_10014278	3064.96	680.841	2.1705	0.00015341	0.022994	sp|Q7XJJ7|FAAH_ARATH Fatty acid amide hydrolase OS=Arabidopsis thaliana GN=FAAH PE=1 SV=1//1.20984e-150
Dendrobium_GLEAN_10014983	79.7886	0	Inf	0.00012729	0.019736	-//-
Dendrobium_GLEAN_10015021	49.2056	378.334	-2.9428	0.00034582	0.041327	sp|Q9LI74|CHUP1_ARATH Protein CHUP1, chloroplastic OS=Arabidopsis thaliana GN=CHUP1 PE=1 SV=1//3.01674e-52
Dendrobium_GLEAN_10015215	525.198	65.0757	3.0127	0.00015896	0.023434	sp|Q9LPU9|VITH1_ARATH Vacuolar iron transporter homolog 1 OS=Arabidopsis thaliana GN=At1g21140 PE=2 SV=1//8.12023e-67
Dendrobium_GLEAN_10016071	1139.51	101.166	3.4936	7.9031e-07	0.00033445	sp|Q9SJL9|XTH32_ARATH Probable xyloglucan endotransglucosylase/hydrolase protein 32 OS=Arabidopsis thaliana GN=XTH32 PE=2 SV=1//1.55355e-136
Dendrobium_GLEAN_10016498	206.52	4298.25	-4.3794	7.267e-07	0.00031494	sp|Q9M153|GDL61_ARATH GDSL esterase/lipase At4g01130 OS=Arabidopsis thaliana GN=At4g01130 PE=2 SV=1//1.50672e-22
Dendrobium_GLEAN_10016623	286.518	0	Inf	2.8515e-06	0.00099477	-//-
Dendrobium_GLEAN_10016786	321.736	12781.9	-5.3121	0.00012898	0.019912	sp|P31673|HS174_ORYSJ 17.4 kDa class I heat shock protein OS=Oryza sativa subsp. japonica GN=HSP17.4 PE=2 SV=2//4.99198e-50
Dendrobium_GLEAN_10017815	2724.96	304.206	3.1631	1.5389e-06	0.00060831	sp|Q9LMM1|C86A4_ARATH Cytochrome P450 86A4 OS=Arabidopsis thaliana GN=CYP86A4 PE=1 SV=1//1.35197e-111
Dendrobium_GLEAN_10018529	502.501	50.2887	3.3208	4.4077e-05	0.0084335	sp|Q8LPH6|MYB86_ARATH Transcription factor MYB86 OS=Arabidopsis thaliana GN=MYB86 PE=2 SV=1//1.63363e-78
Dendrobium_GLEAN_10018662	19.9422	342.715	-4.1031	5.3731e-06	0.0016379	-//-
Dendrobium_GLEAN_10018898	1990.79	210.134	3.244	6.0717e-07	0.00027646	sp|P92973|CCA1_ARATH Protein CCA1 OS=Arabidopsis thaliana GN=CCA1 PE=1 SV=1//2.66155e-15
Dendrobium_GLEAN_10019288	14.7134	352.164	-4.581	0.00025329	0.033374	sp|P05477|HSP21_SOYBN 17.9 kDa class II heat shock protein OS=Glycine max GN=HSP17.9-D PE=3 SV=1//2.06615e-34
Dendrobium_GLEAN_10020559	4697.84	800.314	2.5534	1.1419e-05	0.0028524	sp|Q5Z9S8|AB42G_ORYSJ ABC transporter G family member 42 OS=Oryza sativa subsp. japonica GN=ABCG42 PE=2 SV=1//5.20127e-31
Dendrobium_GLEAN_10020587	11.2748	1155.88	-6.6798	2.8247e-14	1.129e-10	sp|Q7XA40|RGA3_SOLBU Putative disease resistance protein RGA3 OS=Solanum bulbocastanum GN=RGA3 PE=2 SV=2//3.6815e-68
Dendrobium_GLEAN_10020906	455.032	5.38663	6.4004	1.5661e-10	2.5607e-07	-//-
Dendrobium_GLEAN_10021221	2622.63	351.236	2.9005	2.3393e-06	0.00083312	-//-
Dendrobium_GLEAN_10022578	55.3653	531.224	-3.2623	4.3754e-05	0.0084333	sp|Q8S340|PPA22_ARATH Purple acid phosphatase 22 OS=Arabidopsis thaliana GN=PAP22 PE=2 SV=1//4.39618e-163
Dendrobium_GLEAN_10022656	1168.95	207.814	2.4919	0.00033957	0.040989	sp|Q9LU14|APG2_ARATH GDSL esterase/lipase APG OS=Arabidopsis thaliana GN=APG PE=1 SV=1//3.18953e-51
Dendrobium_GLEAN_10023202	3361.97	562.857	2.5785	1.8992e-05	0.0042279	sp|Q682S0|RPT2_ARATH Root phototropism protein 2 OS=Arabidopsis thaliana GN=RPT2 PE=1 SV=2//6.3448e-54
Dendrobium_GLEAN_10023203	9926.72	1762.34	2.4938	1.4278e-05	0.0033568	sp|Q682S0|RPT2_ARATH Root phototropism protein 2 OS=Arabidopsis thaliana GN=RPT2 PE=1 SV=2//1.17067e-138
Dendrobium_GLEAN_10023511	89.381	828.826	-3.213	4.2229e-05	0.0083007	sp|Q1EPG7|CSPL1_MUSAC CASP-like protein 1E1 OS=Musa acuminata GN=MA4_106O17.50 PE=2 SV=1//2.59461e-33
Dendrobium_GLEAN_10023565	2469.39	544.969	2.1799	0.0002438	0.032601	-//-
Dendrobium_GLEAN_10023953	2910.19	177.67	4.0338	1.3695e-09	1.5891e-06	sp|Q8H1D6|RBK1_ARATH Receptor-like cytosolic serine/threonine-protein kinase RBK1 OS=Arabidopsis thaliana GN=RBK1 PE=1 SV=1//1.26638e-76
Dendrobium_GLEAN_10024322	149.692	10273.6	-6.1008	1.3234e-16	9.5205e-13	sp|P31673|HS174_ORYSJ 17.4 kDa class I heat shock protein OS=Oryza sativa subsp. japonica GN=HSP17.4 PE=2 SV=2//1.57424e-58
Dendrobium_GLEAN_10024894	449.534	52.3385	3.1025	0.00015468	0.023087	sp|Q8S1X7|GT15_ORYSJ Probable glucuronosyltransferase Os01g0926700 OS=Oryza sativa subsp. japonica GN=Os01g0926700 PE=3 SV=1//0
Dendrobium_GLEAN_10025098	408.42	45.8389	3.1554	0.00014733	0.022268	-//-
Dendrobium_GLEAN_10026141	697.701	3127.63	-2.1644	0.0003936	0.04582	sp|O04249|STP7_ARATH Sugar transport protein 7 OS=Arabidopsis thaliana GN=STP7 PE=2 SV=1//0
Dendrobium_GLEAN_10026737	74.0615	671.595	-3.1808	0.00013453	0.020592	-//-
Dendrobium_GLEAN_10027016	461.67	9.35513	5.625	1.747e-09	1.8823e-06	sp|F4KGY6|RVE1_ARATH Protein REVEILLE 1 OS=Arabidopsis thaliana GN=RVE1 PE=2 SV=1//1.7919e-33
Dendrobium_GLEAN_10027773	391.749	2398.54	-2.6142	2.3383e-05	0.0050669	sp|Q88FY2|6HN3M_PSEPK 6-hydroxynicotinate 3-monooxygenase OS=Pseudomonas putida (strain KT2440) GN=nicC PE=1 SV=1//4.67816e-14
Dendrobium_GLEAN_10027775	68.159	572.496	-3.0703	4.669e-05	0.0087661	-//-
Dendrobium_GLEAN_10027867	620.753	61.0857	3.3451	9.7571e-05	0.016026	sp|Q10ND7|LAC10_ORYSJ Laccase-10 OS=Oryza sativa subsp. japonica GN=LAC10 PE=2 SV=1//6.24888e-08
Dendrobium_GLEAN_10027970	210.752	4.12105	5.6764	1.1996e-05	0.0029271	sp|Q39214|RPM1_ARATH Disease resistance protein RPM1 OS=Arabidopsis thaliana GN=RPM1 PE=1 SV=1//6.58906e-08
Dendrobium_GLEAN_10028088	443.562	63.565	2.8028	0.00031513	0.039496	sp|Q8L586|Y4958_ARATH Uncharacterized membrane protein At4g09580 OS=Arabidopsis thaliana GN=At4g09580 PE=1 SV=1//3.99301e-08
Dendrobium_GLEAN_10028373	229.526	2714.1	-3.5637	4.2754e-08	2.6958e-05	-//-
Dendrobium_GLEAN_10028426	1.85189	279.796	-7.2392	2.4604e-09	2.5286e-06	-//-
Dendrobium_GLEAN_10028714	18382.9	4385.07	2.0677	0.00036881	0.043784	sp|Q5EFU4|CRD1_HORVU Magnesium-protoporphyrin IX monomethyl ester [oxidative] cyclase, chloroplastic OS=Hordeum vulgare GN=CRD1 PE=1 SV=1//0
Dendrobium_GLEAN_10028744	3428.56	92.1354	5.2177	1.4769e-05	0.0034275	sp|Q9FF86|DCR_ARATH BAHD acyltransferase DCR OS=Arabidopsis thaliana GN=DCR PE=2 SV=1//1.62042e-89
Dendrobium_GLEAN_10029817	462.298	8.80935	5.7136	6.4809e-10	8.6342e-07	sp|F4KGY6|RVE1_ARATH Protein REVEILLE 1 OS=Arabidopsis thaliana GN=RVE1 PE=2 SV=1//2.96476e-14
Dendrobium_GLEAN_10030043	302.938	19.3656	3.9675	4.3842e-05	0.0084333	-//-
Dendrobium_GLEAN_10030178	111.749	0.588722	7.5685	2.5242e-05	0.0054046	sp|P40781|CYPR4_CYNCA Protein CYPRO4 OS=Cynara cardunculus GN=CYPRO4 PE=2 SV=1//0
Dendrobium_GLEAN_10031220	8648.54	1359.15	2.6698	1.0477e-05	0.0026727	sp|Q8LF99|XTH6_ARATH Probable xyloglucan endotransglucosylase/hydrolase protein 6 OS=Arabidopsis thaliana GN=XTH6 PE=2 SV=2//9.65921e-125
Dendrobium_GLEAN_10032180	42.5934	2276.32	-5.7399	3.5605e-06	0.0011643	sp|P09886|HS21C_PEA Small heat shock protein, chloroplastic OS=Pisum sativum GN=HSP21 PE=2 SV=1//1.41176e-32
Dendrobium_GLEAN_10032525	388.288	34.4769	3.4934	4.5782e-05	0.0087134	sp|Q7DNC3|MPCP1_ARATH Mitochondrial phosphate carrier protein 1, mitochondrial OS=Arabidopsis thaliana GN=MPT1 PE=2 SV=1//5.97309e-143
Dendrobium_GLEAN_10032995	39.1627	993.711	-4.6653	3.9369e-06	0.0012314	sp|Q84KJ6|AMT31_ORYSJ Ammonium transporter 3 member 1 OS=Oryza sativa subsp. japonica GN=AMT3-1 PE=2 SV=1//7.49746e-121
Dendrobium_GLEAN_10032996	23.6938	609.1	-4.6841	6.8783e-05	0.012011	sp|Q851M9|AMT32_ORYSJ Ammonium transporter 3 member 2 OS=Oryza sativa subsp. japonica GN=AMT3-2 PE=2 SV=1//4.04016e-121
Dendrobium_GLEAN_10033033	2482.91	55.916	5.4726	6.2843e-05	0.011027	sp|P10707|CB2D_SOLLC Chlorophyll a-b binding protein 1D (Fragment) OS=Solanum lycopersicum GN=CAB1D PE=3 SV=1//5.85133e-23
Dendrobium_GLEAN_10033206	1328.81	72.441	4.1972	1.29e-08	1.1048e-05	sp|B3H5A8|RVE7_ARATH Protein REVEILLE 7 OS=Arabidopsis thaliana GN=RVE7 PE=2 SV=1//1.46483e-36
Dendrobium_GLEAN_10033600	1164.26	132.891	3.1311	3.7083e-06	0.0011805	sp|Q93ZL5|CDF2_ARATH Cyclic dof factor 2 OS=Arabidopsis thaliana GN=CDF2 PE=1 SV=2//5.98461e-66
Dendrobium_GLEAN_10034039	580.065	3764.78	-2.6983	7.6747e-06	0.0021236	sp|H2DH17|C7A22_PANGI Cytochrome P450 CYP749A22 OS=Panax ginseng PE=2 SV=1//4.38528e-149
Dendrobium_GLEAN_10034355	1749.27	39.6466	5.4634	1.841e-13	5.094e-10	-//-
Dendrobium_GLEAN_10035158	9911.38	954.966	3.3756	4.7325e-08	2.7907e-05	sp|Q9S746|HTH_ARATH Protein HOTHEAD OS=Arabidopsis thaliana GN=HTH PE=1 SV=1//2.3664e-122
Dendrobium_GLEAN_10035159	2144.62	172.653	3.6348	5.4586e-08	3.167e-05	sp|Q9S746|HTH_ARATH Protein HOTHEAD OS=Arabidopsis thaliana GN=HTH PE=1 SV=1//5.57039e-68
Dendrobium_GLEAN_10035488	1360.02	197.251	2.7855	3.7337e-05	0.0075879	sp|Q8GSQ1|C85A1_ORYSJ Cytochrome P450 85A1 OS=Oryza sativa subsp. japonica GN=CYP85A1 PE=1 SV=1//0
Dendrobium_GLEAN_10036187	6754.33	1047.03	2.6895	5.5271e-06	0.0016707	sp|Q60E70|COBL3_ORYSJ COBRA-like protein 3 OS=Oryza sativa subsp. japonica GN=BC1L4 PE=2 SV=1//0
Dendrobium_GLEAN_10037020	4397.71	26676.2	-2.6007	1.8771e-06	0.00071831	sp|P24805|TSJT1_TOBAC Stem-specific protein TSJT1 OS=Nicotiana tabacum GN=TSJT1 PE=2 SV=1//2.58487e-32
Dendrobium_GLEAN_10037389	244.967	18.9509	3.6922	0.00025123	0.033351	sp|F8WKW1|UGT2_GARJA 7-deoxyloganetin glucosyltransferase OS=Gardenia jasminoides GN=UGT85A24 PE=1 SV=1//1.47916e-85
Dendrobium_GLEAN_10038144	7543.28	1493.82	2.3362	4.0736e-05	0.0080513	sp|Q9XED8|ARFI_ARATH Auxin response factor 9 OS=Arabidopsis thaliana GN=ARF9 PE=1 SV=1//0
Dendrobium_GLEAN_10038235	1017.74	157.518	2.6918	0.00011023	0.01773	sp|Q9C523|DIR19_ARATH Dirigent protein 19 OS=Arabidopsis thaliana GN=DIR19 PE=2 SV=1//3.26174e-50
Dendrobium_GLEAN_10038433	769.267	77.1982	3.3168	7.6642e-06	0.0021236	sp|O22960|TBL37_ARATH Protein trichome birefringence-like 37 OS=Arabidopsis thaliana GN=TBL37 PE=2 SV=2//6.36077e-32
Dendrobium_GLEAN_10038455	1661.65	328.386	2.3392	0.00043205	0.049653	sp|Q56X72|RTNLS_ARATH Reticulon-like protein B21 OS=Arabidopsis thaliana GN=RTNLB21 PE=2 SV=2//7.35648e-33
Dendrobium_GLEAN_10038540	84.2539	1217.55	-3.8531	0.0003721	0.043885	sp|O81970|C71A9_SOYBN Cytochrome P450 71A9 OS=Glycine max GN=CYP71A9 PE=2 SV=1//5.08659e-121
Dendrobium_GLEAN_10038951	983.599	125.407	2.9715	8.9469e-06	0.0023321	sp|Q9LJR3|SPA3_ARATH Protein SPA1-RELATED 3 OS=Arabidopsis thaliana GN=SPA3 PE=1 SV=1//1.25529e-162
Dendrobium_GLEAN_10039652	1344.78	145.273	3.2105	0.00030034	0.038175	sp|Q9LS40|ASPG1_ARATH Protein ASPARTIC PROTEASE IN GUARD CELL 1 OS=Arabidopsis thaliana GN=ASPG1 PE=1 SV=1//1.86871e-39
Dendrobium_GLEAN_10039988	17273.3	3950.4	2.1285	9.8849e-05	0.016162	sp|Q16956|GRP78_APLCA 78 kDa glucose-regulated protein OS=Aplysia californica PE=1 SV=1//6.32256e-08
Dendrobium_GLEAN_10040660	509.773	24.5782	4.3744	4.8827e-07	0.0002311	sp|Q96324|GSTFB_ARATH Glutathione S-transferase F11 OS=Arabidopsis thaliana GN=GSTF11 PE=2 SV=1//5.79861e-66
Dendrobium_GLEAN_10040737	1202.89	82.7396	3.8618	6.9505e-08	3.9685e-05	-//-
Dendrobium_GLEAN_10040821	12648.8	249.971	5.6611	1.1999e-12	2.6976e-09	sp|Q8RXN0|AB11G_ARATH ABC transporter G family member 11 OS=Arabidopsis thaliana GN=ABCG11 PE=1 SV=1//4.34864e-48
Dendrobium_GLEAN_10042129	120.628	7224.19	-5.9042	3.1397e-18	2.8235e-14	sp|P05477|HSP21_SOYBN 17.9 kDa class II heat shock protein OS=Glycine max GN=HSP17.9-D PE=3 SV=1//1.30249e-57
Dendrobium_GLEAN_10042205	0.524269	116.292	-7.7932	1.33e-05	0.0031894	sp|Q0D5B9|SAP16_ORYSJ Zinc finger AN1 and C2H2 domain-containing stress-associated protein 16 OS=Oryza sativa subsp. japonica GN=SAP16 PE=2 SV=2//1.88621e-111
Dendrobium_GLEAN_10044120	860.214	9305.25	-3.4353	1.5293e-08	1.2503e-05	sp|Q96303|PHT14_ARATH Inorganic phosphate transporter 1-4 OS=Arabidopsis thaliana GN=PHT1-4 PE=1 SV=1//0
Dendrobium_GLEAN_10044232	2787.28	372.055	2.9053	4.9593e-05	0.009243	sp|Q9LSE7|B561C_ARATH Cytochrome b561 and DOMON domain-containing protein At3g25290 OS=Arabidopsis thaliana GN=At3g25290 PE=2 SV=1//1.41886e-120
Dendrobium_GLEAN_10044420	975.414	116.694	3.0633	1.9041e-05	0.0042279	sp|Q94CH6|EXL3_ARATH GDSL esterase/lipase EXL3 OS=Arabidopsis thaliana GN=EXL3 PE=2 SV=1//4.8748e-86
Dendrobium_GLEAN_10044536	0.966809	89.2969	-6.5292	0.00033293	0.040735	sp|Q39828|SDL5A_SOYBN Dynamin-related protein 5A OS=Glycine max PE=2 SV=1//2.33873e-92
Dendrobium_GLEAN_10045158	379.459	2676.97	-2.8186	4.244e-06	0.001316	sp|Q9M0G0|GAGT3_ARATH Gamma-glutamyltranspeptidase 3 OS=Arabidopsis thaliana GN=GGT3 PE=2 SV=1//0
Dendrobium_GLEAN_10045745	240.151	1655.77	-2.7855	1.5096e-05	0.0034808	-//-
Dendrobium_GLEAN_10046548	609.022	72.2048	3.0763	0.00023537	0.031829	sp|P54771|TYDC5_PAPSO Tyrosine/DOPA decarboxylase 5 OS=Papaver somniferum GN=TYDC5 PE=2 SV=1//1.54887e-154
Dendrobium_GLEAN_10046585	510.93	3731.9	-2.8687	3.6862e-06	0.0011805	sp|Q9FKS8|LHT1_ARATH Lysine histidine transporter 1 OS=Arabidopsis thaliana GN=LHT1 PE=1 SV=1//2.10269e-166
Dendrobium_GLEAN_10046758	1506.93	295.415	2.3508	0.00016209	0.023798	sp|Q8LPH6|MYB86_ARATH Transcription factor MYB86 OS=Arabidopsis thaliana GN=MYB86 PE=2 SV=1//3.13157e-80
Dendrobium_GLEAN_10046777	361.437	6579.69	-4.1862	0.00011306	0.018075	sp|Q6EQ60|AB47G_ORYSJ ABC transporter G family member 47 OS=Oryza sativa subsp. japonica GN=ABCG47 PE=3 SV=2//8.03269e-08
Dendrobium_GLEAN_10048035	591.121	82.1271	2.8475	0.00018524	0.026029	sp|Q8W4K5|VAB_ARATH VAN3-binding protein OS=Arabidopsis thaliana GN=VAB PE=1 SV=1//1.03022e-29
Dendrobium_GLEAN_10048036	643.059	64.5277	3.317	1.1849e-05	0.0029232	sp|Q8W4K5|VAB_ARATH VAN3-binding protein OS=Arabidopsis thaliana GN=VAB PE=1 SV=1//7.81909e-25
Dendrobium_GLEAN_10048630	2115.43	502.187	2.0747	0.0003193	0.039605	sp|Q9LJB7|BBX32_ARATH B-box zinc finger protein 32 OS=Arabidopsis thaliana GN=BBX32 PE=1 SV=1//3.23291e-08
Dendrobium_GLEAN_10048652	2658.33	566.255	2.231	0.00033537	0.040894	sp|P0A573|Y2734_MYCBO Uncharacterized protein Mb2734 OS=Mycobacterium bovis (strain ATCC BAA-935 / AF2122/97) GN=Mb2734 PE=3 SV=1//2.03064e-08
Dendrobium_GLEAN_10048838	33513.7	7406.75	2.1778	0.00022995	0.031331	sp|Q9XF59|PIP12_MAIZE Aquaporin PIP1-2 OS=Zea mays GN=PIP1-2 PE=1 SV=1//0
Dendrobium_GLEAN_10049312	7338.34	819.96	3.1618	5.3147e-07	0.00024509	sp|Q93VR4|ML423_ARATH MLP-like protein 423 OS=Arabidopsis thaliana GN=MLP423 PE=2 SV=1//2.17533e-41
Dendrobium_GLEAN_10050533	98.3135	888.558	-3.176	9.1378e-06	0.0023647	sp|Q9CAP4|ERF13_ARATH Ethylene-responsive transcription factor ERF013 OS=Arabidopsis thaliana GN=ERF013 PE=2 SV=1//1.02144e-22
Dendrobium_GLEAN_10051326	381.519	0.436173	9.7726	1.9959e-06	0.00075574	sp|Q9ASS7|CAAT2_ARATH Cationic amino acid transporter 2, vacuolar OS=Arabidopsis thaliana GN=CAT2 PE=2 SV=1//1.91322e-146
Dendrobium_GLEAN_10052432	235.317	2730.41	-3.5364	2.153e-08	1.6836e-05	sp|Q6AWW5|Y5262_ARATH Ankyrin repeat-containing protein At5g02620 OS=Arabidopsis thaliana GN=At5g02620 PE=1 SV=1//2.19884e-25
Dendrobium_GLEAN_10054275	536.316	65.2023	3.0401	8.5515e-05	0.014442	sp|Q9LD83|SLAC1_ARATH Guard cell S-type anion channel SLAC1 OS=Arabidopsis thaliana GN=SLAC1 PE=1 SV=1//2.58136e-70
Dendrobium_GLEAN_10054305	22746	430.999	5.7218	9.4343e-05	0.015639	sp|P07369|CB2G_SOLLC Chlorophyll a-b binding protein 3C, chloroplastic OS=Solanum lycopersicum GN=CAB3C PE=3 SV=1//3.14306e-161
Dendrobium_GLEAN_10055264	5.96431	143.876	-4.5923	0.00029886	0.038122	sp|Q5XF09|PT311_ARATH Probable sugar phosphate/phosphate translocator At3g11320 OS=Arabidopsis thaliana GN=At3g11320 PE=2 SV=1//7.4566e-138
Dendrobium_GLEAN_10056197	19765.5	3539.84	2.4812	3.6007e-05	0.0074013	sp|B8ANF1|CHLH_ORYSI Magnesium-chelatase subunit ChlH, chloroplastic OS=Oryza sativa subsp. indica GN=CHLH PE=3 SV=1//0
Dendrobium_GLEAN_10057486	838.081	95.3434	3.1359	1.8602e-05	0.0041821	sp|Q9FFX4|KNU_ARATH Zinc finger protein KNUCKLES OS=Arabidopsis thaliana GN=KNU PE=1 SV=1//3.90989e-09
Dendrobium_GLEAN_10058365	0	221.051	#NAME?	6.2216e-10	8.6076e-07	sp|P49249|IN22_MAIZE IN2-2 protein OS=Zea mays GN=IN2-2 PE=2 SV=1//2.70486e-51
Dendrobium_GLEAN_10059650	15534.6	3638.84	2.0939	0.00034169	0.041107	sp|O65718|CNGC2_ARATH Cyclic nucleotide-gated ion channel 2 OS=Arabidopsis thaliana GN=CNGC2 PE=1 SV=1//0
Dendrobium_GLEAN_10059786	422.202	14.718	4.8423	3.4803e-08	2.3519e-05	-//-
Dendrobium_GLEAN_10060223	269.427	0	Inf	3.6595e-11	6.5818e-08	-//-
Dendrobium_GLEAN_10060663	1713.88	335.986	2.3508	0.00026199	0.034118	sp|O23969|SF21_HELAN Pollen-specific protein SF21 OS=Helianthus annuus GN=SF21 PE=2 SV=1//9.7052e-10
Dendrobium_GLEAN_10060915	19.2744	340.448	-4.1427	7.4536e-06	0.0021111	-//-
Dendrobium_GLEAN_10060937	485.19	14.6988	5.0448	2.3894e-08	1.8287e-05	sp|P04146|COPIA_DROME Copia protein OS=Drosophila melanogaster GN=GIP PE=1 SV=3//2.15638e-59
Dendrobium_GLEAN_10061822	45.6035	366.07	-3.0049	0.00025126	0.033351	sp|Q9M0G0|GAGT3_ARATH Gamma-glutamyltranspeptidase 3 OS=Arabidopsis thaliana GN=GGT3 PE=2 SV=1//1.71943e-34
Dendrobium_GLEAN_10063085	2094.38	375.161	2.4809	5.1461e-05	0.009518	sp|P93735|ELIP1_ARATH Early light-induced protein 1, chloroplastic OS=Arabidopsis thaliana GN=ELIP1 PE=1 SV=1//8.54637e-38
Dendrobium_GLEAN_10063086	1379.28	209.822	2.7167	2.245e-05	0.0048943	-//-
Dendrobium_GLEAN_10063713	82.6292	802.114	-3.2791	1.2043e-05	0.0029271	sp|Q3ECH2|Y1670_ARATH Probable receptor-like protein kinase At1g67000 OS=Arabidopsis thaliana GN=At1g67000 PE=2 SV=2//1.13093e-92
Dendrobium_GLEAN_10064246	0	168.65	#NAME?	3.3205e-08	2.297e-05	sp|P49249|IN22_MAIZE IN2-2 protein OS=Zea mays GN=IN2-2 PE=2 SV=1//1.49608e-27
Dendrobium_GLEAN_10064461	1557.64	116.516	3.7408	3.5308e-08	2.3519e-05	sp|Q9FKP1|CCX1_ARATH Cation/calcium exchanger 1 OS=Arabidopsis thaliana GN=CCX1 PE=2 SV=1//4.27739e-115
Dendrobium_GLEAN_10064484	843.023	48.4107	4.1222	3.1139e-08	2.1962e-05	-//-
Dendrobium_GLEAN_10064489	1289.8	253.53	2.3469	0.00033715	0.040972	sp|Q9C5J9|Y5483_ARATH Uncharacterized GTP-binding protein At5g64813 OS=Arabidopsis thaliana GN=At5g64813 PE=1 SV=1//9.18632e-98
Dendrobium_GLEAN_10064494	9016.39	1760.01	2.357	5.3925e-05	0.0098463	sp|Q02283|HAT5_ARATH Homeobox-leucine zipper protein HAT5 OS=Arabidopsis thaliana GN=HAT5 PE=1 SV=1//4.40338e-40
Dendrobium_GLEAN_10064558	6601.74	1371.38	2.2672	0.00027109	0.034952	sp|P17407|21KD_DAUCA 21 kDa protein OS=Daucus carota PE=2 SV=1//3.14114e-33
Dendrobium_GLEAN_10064951	81.2398	0	Inf	0.00011956	0.01878	sp|Q9C533|ZDHC1_ARATH Probable protein S-acyltransferase 22 OS=Arabidopsis thaliana GN=PAT22 PE=2 SV=2//6.85785e-15
Dendrobium_GLEAN_10065001	2255.84	477.522	2.24	5.1597e-05	0.009518	sp|Q96376|LIS_CLABR S-linalool synthase OS=Clarkia breweri GN=LIS PE=2 SV=1//1.71946e-123
Dendrobium_GLEAN_10065002	792.6	168.834	2.231	0.00033888	0.040989	sp|Q96376|LIS_CLABR S-linalool synthase OS=Clarkia breweri GN=LIS PE=2 SV=1//4.52635e-16
Dendrobium_GLEAN_10065442	1490.54	72.4262	4.3632	1.7143e-09	1.8823e-06	sp|Q8VY93|GDL66_ARATH GDSL esterase/lipase At4g26790 OS=Arabidopsis thaliana GN=At4g26790 PE=2 SV=1//4.16552e-80
Dendrobium_GLEAN_10065444	607.848	26.1704	4.5377	7.1159e-08	3.9995e-05	sp|Q9SJB4|GDL34_ARATH GDSL esterase/lipase At2g04570 OS=Arabidopsis thaliana GN=At2g04570 PE=2 SV=1//2.87901e-43
Dendrobium_GLEAN_10065487	52.9971	921.269	-4.1196	2.7058e-08	1.9925e-05	-//-
Dendrobium_GLEAN_10065772	0	179.681	#NAME?	1.5671e-08	1.2527e-05	-//-
Dendrobium_GLEAN_10065815	344.01	3524.34	-3.3568	9.3861e-08	5.1156e-05	sp|Q8GT20|BEBT_TOBAC Benzyl alcohol O-benzoyltransferase OS=Nicotiana tabacum GN=HSR201 PE=1 SV=1//0
Dendrobium_GLEAN_10066138	3052.52	235.156	3.6983	3.7079e-09	3.7049e-06	sp|Q96502|COL2_ARATH Zinc finger protein CONSTANS-LIKE 2 OS=Arabidopsis thaliana GN=COL2 PE=1 SV=1//5.20153e-65
Dendrobium_GLEAN_10066196	3905.69	468.093	3.0607	1.4902e-06	0.0005956	sp|Q0JKM9|MAN1_ORYSJ Mannan endo-1,4-beta-mannosidase 1 OS=Oryza sativa subsp. japonica GN=MAN1 PE=2 SV=2//0
Dendrobium_GLEAN_10066306	603.075	47.7384	3.6591	5.1754e-06	0.0015912	-//-
Dendrobium_GLEAN_10066307	608.633	49.6141	3.6167	6.9038e-06	0.0019867	-//-
Dendrobium_GLEAN_10066692	360.805	2016.08	-2.4823	6.0485e-05	0.010771	-//-
Dendrobium_GLEAN_10066749	1140.57	187.851	2.6021	0.00011456	0.018234	sp|Q52K88|NUD13_ARATH Nudix hydrolase 13, mitochondrial OS=Arabidopsis thaliana GN=NUDT13 PE=1 SV=1//4.62427e-65
Dendrobium_GLEAN_10067132	1223.1	52.1837	4.5508	4.5662e-10	6.57e-07	sp|O49485|SERA1_ARATH D-3-phosphoglycerate dehydrogenase 1, chloroplastic OS=Arabidopsis thaliana GN=PGDH1 PE=1 SV=1//0
Dendrobium_GLEAN_10068550	436.027	3887.08	-3.1562	1.8728e-07	9.3567e-05	sp|P28583|CDPK_SOYBN Calcium-dependent protein kinase SK5 OS=Glycine max PE=1 SV=1//8.79069e-174
Dendrobium_GLEAN_10068766	656.549	57.6822	3.5087	6.5634e-06	0.001904	-//-
Dendrobium_GLEAN_10069222	14.6177	417.025	-4.8343	1.0761e-07	5.7773e-05	sp|Q9LRJ9|CRR38_ARATH Cysteine-rich repeat secretory protein 38 OS=Arabidopsis thaliana GN=CRRSP38 PE=2 SV=1//1.30504e-40
Dendrobium_GLEAN_10069911	7976.96	31.4644	7.986	2.6343e-12	5.2644e-09	sp|P53416|BBS_PHASS Bibenzyl synthase OS=Phalaenopsis sp. GN=BIBSY212 PE=2 SV=1//0
Dendrobium_GLEAN_10071059	4.63669	301.464	-6.0227	6.678e-07	0.00029656	sp|Q0VCZ3|YTHD2_BOVIN YTH domain-containing family protein 2 OS=Bos taurus GN=YTHDF2 PE=2 SV=1//1.37234e-58
Dendrobium_GLEAN_10071202	11798.3	1044.7	3.4974	2.7201e-08	1.9925e-05	sp|B5LZ79|DEF_GYMCO Defensin-like protein OS=Gymnadenia conopsea PE=1 SV=1//8.19132e-26
Dendrobium_GLEAN_10071205	81.81	0	Inf	9.7092e-05	0.016021	sp|Q9M038|SFC1_ARATH Mitochondrial succinate-fumarate transporter 1 OS=Arabidopsis thaliana GN=SFC1 PE=2 SV=1//4.55331e-06
Dendrobium_GLEAN_10071439	0	374.448	#NAME?	4.0637e-14	1.4618e-10	-//-
Dendrobium_GLEAN_10072937	36.2483	442.041	-3.6082	1.1865e-05	0.0029232	sp|O81905|SD18_ARATH Receptor-like serine/threonine-protein kinase SD1-8 OS=Arabidopsis thaliana GN=SD18 PE=1 SV=1//5.50357e-65
Dendrobium_GLEAN_10073293	2195.71	344.413	2.6725	3.169e-05	0.0066585	sp|Q9FH92|IX15L_ARATH Protein IRX15-LIKE OS=Arabidopsis thaliana GN=IRX15-L PE=2 SV=1//4.76724e-95
Dendrobium_GLEAN_10074935	94.6037	0.872346	6.7609	0.00023773	0.032028	sp|F4JRF4|MUTYH_ARATH A/G-specific adenine DNA glycosylase OS=Arabidopsis thaliana GN=MYH PE=3 SV=1//3.95803e-130
Dendrobium_GLEAN_10077270	25531.8	5870.4	2.1208	0.00010613	0.017196	sp|Q9LS40|ASPG1_ARATH Protein ASPARTIC PROTEASE IN GUARD CELL 1 OS=Arabidopsis thaliana GN=ASPG1 PE=1 SV=1//5.15659e-47
Dendrobium_GLEAN_10077527	502.754	55.4369	3.1809	0.00011041	0.01773	-//-
Dendrobium_GLEAN_10077622	13.4536	949.2	-6.1406	0.00032968	0.040613	sp|A1L4Y2|ADHL3_ARATH Alcohol dehydrogenase-like 3 OS=Arabidopsis thaliana GN=At1g32780 PE=2 SV=1//7.91196e-157
Dendrobium_GLEAN_10078754	2921.21	349.274	3.0641	0.0001466	0.022251	sp|D1MI46|C76BA_SWEMU Geraniol 8-hydroxylase OS=Swertia mussotii GN=CYP76B10 PE=1 SV=1//3.12559e-146
Dendrobium_GLEAN_10078993	2940.38	564.816	2.3801	7.5614e-05	0.013014	sp|Q9LTA3|U91C1_ARATH UDP-glycosyltransferase 91C1 OS=Arabidopsis thaliana GN=UGT91C1 PE=2 SV=1//5.68417e-26
Dendrobium_GLEAN_10078995	1710.42	298.006	2.5209	0.00017096	0.024897	sp|Q9LTA3|U91C1_ARATH UDP-glycosyltransferase 91C1 OS=Arabidopsis thaliana GN=UGT91C1 PE=2 SV=1//2.67764e-78
Dendrobium_GLEAN_10079805	1108.75	146.204	2.9229	3.9699e-05	0.0079333	-//-
Dendrobium_GLEAN_10080871	29.692	304.632	-3.3589	0.00018974	0.026455	sp|Q9FY79|LAC14_ARATH Laccase-14 OS=Arabidopsis thaliana GN=LAC14 PE=2 SV=1//0
Dendrobium_GLEAN_10082868	754.483	3255.89	-2.1095	0.00039954	0.046212	sp|Q9M2S4|LRKS4_ARATH L-type lectin-domain containing receptor kinase S.4 OS=Arabidopsis thaliana GN=LECRKS4 PE=2 SV=1//0
Dendrobium_GLEAN_10082937	939.02	7368.35	-2.9721	6.1677e-07	0.00027732	sp|Q9FKW4|CDPKS_ARATH Calcium-dependent protein kinase 28 OS=Arabidopsis thaliana GN=CPK28 PE=1 SV=1//1.58082e-65
Dendrobium_GLEAN_10083716	48932.6	7496.17	2.7066	3.0926e-06	0.0010397	sp|Q9ATM7|PIP23_MAIZE Aquaporin PIP2-3 OS=Zea mays GN=PIP2-3 PE=2 SV=1//5.13031e-179
Dendrobium_GLEAN_10083788	1972.38	272.719	2.8544	7.6351e-06	0.0021236	sp|Q9SIV3|GLK1_ARATH Transcription activator GLK1 OS=Arabidopsis thaliana GN=GLK1 PE=1 SV=2//5.13455e-59
Dendrobium_GLEAN_10084487	2385.08	527.769	2.1761	0.00018096	0.025769	sp|Q8S9H7|DIV_ANTMA Transcription factor DIVARICATA OS=Antirrhinum majus GN=DIVARICATA PE=2 SV=1//1.57619e-51
Dendrobium_GLEAN_10084654	7319.59	801.467	3.191	2.6383e-05	0.0056155	sp|Q10RB4|BGAL5_ORYSJ Beta-galactosidase 5 OS=Oryza sativa subsp. japonica GN=Os03g0165400 PE=2 SV=1//0
Dendrobium_GLEAN_10084734	497.007	57.6822	3.1071	0.00013175	0.020253	sp|Q9FHD7|Y5126_ARATH Probable serine/threonine-protein kinase At5g41260 OS=Arabidopsis thaliana GN=At5g41260 PE=1 SV=1//0
Dendrobium_GLEAN_10085531	272.275	1341.06	-2.3002	0.00035664	0.04248	sp|Q29Q28|UTR2_ARATH UDP-galactose/UDP-glucose transporter 2 OS=Arabidopsis thaliana GN=UTR2 PE=2 SV=1//1.07227e-175
Dendrobium_GLEAN_10085819	227.108	5.73467	5.3075	0.00013527	0.020618	sp|P40115|CRY1_SINAL Cryptochrome-1 OS=Sinapis alba GN=PHR1 PE=2 SV=1//8.68289e-45
Dendrobium_GLEAN_10085982	208.532	1183.12	-2.5043	8.8168e-05	0.01482	sp|Q6S4P4|RF2B_ORYSJ Transcription factor RF2b OS=Oryza sativa subsp. japonica GN=RF2b PE=1 SV=2//3.7338e-40
Dendrobium_GLEAN_10086556	11.5339	238.343	-4.3691	1.8006e-05	0.0040735	-//-
Dendrobium_GLEAN_10087099	558.552	20622.9	-5.2064	1.0599e-15	6.3543e-12	sp|P31673|HS174_ORYSJ 17.4 kDa class I heat shock protein OS=Oryza sativa subsp. japonica GN=HSP17.4 PE=2 SV=2//1.31213e-49
Dendrobium_GLEAN_10087455	1642.99	342.384	2.2626	0.00021336	0.029293	sp|Q8S7W9|HOX21_ORYSJ Homeobox-leucine zipper protein HOX21 OS=Oryza sativa subsp. japonica GN=HOX21 PE=2 SV=1//2.18256e-87
Dendrobium_GLEAN_10088989	201.306	1299.51	-2.6905	3.1838e-05	0.0066585	sp|A2A1A0|NCS1_COPJA S-norcoclaurine synthase 1 OS=Coptis japonica GN=NCS1 PE=1 SV=1//5.81127e-112
Dendrobium_GLEAN_10089091	37.1474	335.498	-3.175	0.00018034	0.025769	sp|Q9C7S5|PSYR1_ARATH Tyrosine-sulfated glycopeptide receptor 1 OS=Arabidopsis thaliana GN=PSYR1 PE=2 SV=1//0
Dendrobium_GLEAN_10089647	483.729	2347.28	-2.2787	0.00017624	0.025359	sp|P46897|ATHB7_ARATH Homeobox-leucine zipper protein ATHB-7 OS=Arabidopsis thaliana GN=ATHB-7 PE=2 SV=2//1.16218e-23
Dendrobium_GLEAN_10089671	48790.6	2820.41	4.1126	9.5534e-09	8.5911e-06	sp|P12062|CB26_PETSP Chlorophyll a-b binding protein 37, chloroplastic OS=Petunia sp. GN=CAB37 PE=3 SV=1//1.32206e-167
Dendrobium_GLEAN_10090203	1058.09	190.613	2.4727	0.00018397	0.026029	sp|F4IPY2|SYCM_ARATH Cysteine--tRNA ligase, chloroplastic/mitochondrial OS=Arabidopsis thaliana GN=SYCO PE=2 SV=1//1.79068e-158
Dendrobium_GLEAN_10090480	136.523	785.969	-2.5253	0.00019734	0.027198	sp|Q56YU0|AL2C4_ARATH Aldehyde dehydrogenase family 2 member C4 OS=Arabidopsis thaliana GN=ALDH2C4 PE=1 SV=2//0
Dendrobium_GLEAN_10091209	69.0301	1136.4	-4.0411	1.3581e-08	1.1361e-05	sp|P16016|CAHC_SPIOL Carbonic anhydrase, chloroplastic OS=Spinacia oleracea PE=1 SV=2//1.47523e-44
Dendrobium_GLEAN_10091677	0	68.4532	#NAME?	0.00031394	0.039485	sp|Q9SIC9|PP178_ARATH Pentatricopeptide repeat-containing protein At2g31400, chloroplastic OS=Arabidopsis thaliana GN=At2g31400 PE=2 SV=1//2.18223e-06
Dendrobium_GLEAN_10091816	7972.79	872.161	3.1924	7.3793e-07	0.000316	sp|Q9FLE8|Y5986_ARATH Uncharacterized protein At5g39865 OS=Arabidopsis thaliana GN=At5g39865 PE=2 SV=1//3.01191e-17
Dendrobium_GLEAN_10091825	337.602	9.41955	5.1635	7.7752e-08	4.3028e-05	sp|Q9LT69|SERA3_ARATH D-3-phosphoglycerate dehydrogenase 3, chloroplastic OS=Arabidopsis thaliana GN=PGDH3 PE=1 SV=1//2.00335e-55
Dendrobium_GLEAN_10091976	1418.71	2.48596	9.1566	1.9702e-22	3.5435e-18	-//-
Dendrobium_GLEAN_10092575	193.677	2389.4	-3.6249	8.7592e-09	8.0789e-06	sp|P31691|ADT_ORYSJ ADP,ATP carrier protein, mitochondrial OS=Oryza sativa subsp. japonica GN=Os02g0718900 PE=2 SV=1//0
Dendrobium_GLEAN_10093328	1163.79	141.109	3.0439	0.00023425	0.031798	-//-
Dendrobium_GLEAN_10093479	887.098	6821.52	-2.9429	4.5945e-07	0.00022036	sp|Q39219|AOX1A_ARATH Ubiquinol oxidase 1a, mitochondrial OS=Arabidopsis thaliana GN=AOX1A PE=1 SV=2//1.2466e-164
Dendrobium_GLEAN_10093519	402.067	3.64193	6.7866	1.39e-10	2.3809e-07	sp|B9T536|TPS10_RICCO Terpene synthase 10 OS=Ricinus communis GN=TPS10 PE=2 SV=1//6.63655e-09
Dendrobium_GLEAN_10093520	790.247	4.81938	7.3573	4.585e-08	2.7907e-05	sp|B3TPQ7|ATESY_MAGGA Alpha-terpineol synthase, chloroplastic OS=Magnolia grandiflora PE=1 SV=1//1.09249e-40
Dendrobium_GLEAN_10094495	2744.18	529.46	2.3738	0.00019325	0.026771	sp|F4HVY0|CER1_ARATH Protein ECERIFERUM 1 OS=Arabidopsis thaliana GN=CER1 PE=1 SV=1//2.11505e-35
Dendrobium_GLEAN_10095332	0	127.912	#NAME?	4.2722e-05	0.008352	-//-
Dendrobium_GLEAN_10095507	1956.48	379.443	2.3663	7.6146e-05	0.013043	sp|Q500U8|TKPR1_ARATH Tetraketide alpha-pyrone reductase 1 OS=Arabidopsis thaliana GN=TKPR1 PE=1 SV=1//7.3588e-31
Dendrobium_GLEAN_10096249	1162.97	121.862	3.2545	2.8761e-06	0.00099477	sp|Q8L7J2|BGL06_ORYSJ Beta-glucosidase 6 OS=Oryza sativa subsp. japonica GN=BGLU6 PE=1 SV=1//0
Dendrobium_GLEAN_10096612	0.524269	98.0656	-7.5473	5.8263e-05	0.010479	sp|Q40168|AG_SOLLC Floral homeotic protein AGAMOUS OS=Solanum lycopersicum GN=AG1 PE=2 SV=1//5.23728e-108
Dendrobium_GLEAN_10096781	4764.85	714.985	2.7364	8.0648e-06	0.0021691	sp|P92973|CCA1_ARATH Protein CCA1 OS=Arabidopsis thaliana GN=CCA1 PE=1 SV=1//5.76964e-19
Dendrobium_GLEAN_10096782	11279.9	1656.02	2.768	3.08e-06	0.0010397	sp|Q6R0H1|LHY_ARATH Protein LHY OS=Arabidopsis thaliana GN=LHY PE=1 SV=2//1.17726e-12
Dendrobium_GLEAN_10097033	110.222	0	Inf	6.3306e-06	0.0018514	sp|Q9C503|NDF5_ARATH Protein NDH-DEPENDENT CYCLIC ELECTRON FLOW 5 OS=Arabidopsis thaliana GN=NDF5 PE=2 SV=1//8.30101e-21
Dendrobium_GLEAN_10097549	141.298	0	Inf	4.4054e-07	0.00021414	sp|Q06215|PPO_VICFA Polyphenol oxidase A1, chloroplastic OS=Vicia faba PE=1 SV=1//4.99925e-130
Dendrobium_GLEAN_10097553	143.626	1.61362	6.4759	1.0094e-05	0.0025934	sp|P43309|PPO_MALDO Polyphenol oxidase, chloroplastic OS=Malus domestica PE=2 SV=1//1.05326e-142
Dendrobium_GLEAN_10097774	6284.5	956.807	2.7155	7.8159e-06	0.0021462	sp|Q9C8M9|SRF6_ARATH Protein STRUBBELIG-RECEPTOR FAMILY 6 OS=Arabidopsis thaliana GN=SRF6 PE=1 SV=1//1.08064e-92
Dendrobium_GLEAN_10097780	3731.89	571.689	2.7066	1.3122e-05	0.0031679	sp|Q9C8M9|SRF6_ARATH Protein STRUBBELIG-RECEPTOR FAMILY 6 OS=Arabidopsis thaliana GN=SRF6 PE=1 SV=1//4.10329e-131
Dendrobium_GLEAN_10098543	904.596	35.764	4.6607	1.7791e-09	1.8823e-06	sp|Q5H7P5|EBM_LILLO Mannosylglycoprotein endo-beta-mannosidase OS=Lilium longiflorum GN=EBM PE=1 SV=4//2.84247e-32
Dendrobium_GLEAN_10099800	316.976	0	Inf	1.9527e-12	4.1318e-09	-//-
Dendrobium_GLEAN_10100157	373.774	1682.29	-2.1702	0.00031625	0.0395	sp|Q69XJ0|SPX1_ORYSJ SPX domain-containing protein 1 OS=Oryza sativa subsp. japonica GN=SPX1 PE=2 SV=1//6.67974e-103
Dendrobium_GLEAN_10100853	2307.74	468.638	2.2999	0.00018484	0.026029	sp|Q9LZR3|CSLA9_ARATH Glucomannan 4-beta-mannosyltransferase 9 OS=Arabidopsis thaliana GN=CSLA9 PE=2 SV=1//0
Dendrobium_GLEAN_10101282	624.457	63.2621	3.3032	1.4746e-05	0.0034275	-//-
Dendrobium_GLEAN_10101420	236.358	1177.69	-2.3169	0.0003177	0.039543	sp|Q6NQB7|B3GT7_ARATH Beta-1,3-galactosyltransferase 7 OS=Arabidopsis thaliana GN=B3GALT7 PE=2 SV=1//1.42133e-79
Dendrobium_GLEAN_10102221	9.29333	197.874	-4.4122	9.1085e-05	0.015169	sp|Q5PNY6|PUB21_ARATH U-box domain-containing protein 21 OS=Arabidopsis thaliana GN=PUB21 PE=2 SV=1//8.02596e-97
Dendrobium_GLEAN_10102803	50.3219	560.541	-3.4776	5.6424e-06	0.0016914	sp|Q9SJM1|ACR10_ARATH ACT domain-containing protein ACR10 OS=Arabidopsis thaliana GN=ACR10 PE=2 SV=1//1.9294e-162
Dendrobium_GLEAN_10103169	0	1533.86	#NAME?	0.00030143	0.038178	sp|Q945B6|AOP1L_ARATH Probable 2-oxoglutarate-dependent dioxygenase AOP1.2 OS=Arabidopsis thaliana GN=AOP1.2 PE=2 SV=1//5.60644e-50
Dendrobium_GLEAN_10105220	293.136	1405.24	-2.2612	0.00038049	0.044582	sp|Q8GUH1|PUB33_ARATH U-box domain-containing protein 33 OS=Arabidopsis thaliana GN=PUB33 PE=2 SV=2//2.64705e-39
Dendrobium_GLEAN_10105519	0.524269	111.914	-7.7379	1.6058e-05	0.0036791	sp|Q9M7Q4|AI5L5_ARATH ABSCISIC ACID-INSENSITIVE 5-like protein 5 OS=Arabidopsis thaliana GN=ABF2 PE=1 SV=1//2.37107e-67
Dendrobium_GLEAN_10106010	369.57	31.6858	3.5439	4.679e-05	0.0087661	sp|Q19KC1|NIP21_MAIZE Aquaporin NIP2-1 OS=Zea mays GN=NIP2-1 PE=2 SV=2//1.46617e-39
Dendrobium_GLEAN_10106753	374.759	2093.71	-2.482	4.0712e-05	0.0080513	sp|F8WKW1|UGT2_GARJA 7-deoxyloganetin glucosyltransferase OS=Gardenia jasminoides GN=UGT85A24 PE=1 SV=1//0
Dendrobium_GLEAN_10107666	1710.67	240.816	2.8286	1.3682e-05	0.0032594	sp|O48651|ERG1_PANGI Squalene monooxygenase OS=Panax ginseng PE=2 SV=1//0
Dendrobium_GLEAN_10108736	1937.35	8214.45	-2.0841	0.00033096	0.040631	-//-
Dendrobium_GLEAN_10109220	35.6503	431.604	-3.5977	6.2233e-06	0.0018349	-//-
Dendrobium_GLEAN_10110627	506.795	39.9946	3.6635	0.00037812	0.044449	sp|Q9AR73|HQGT_RAUSE Hydroquinone glucosyltransferase OS=Rauvolfia serpentina GN=AS PE=1 SV=1//7.71289e-124
Dendrobium_GLEAN_10110847	19.2544	319.164	-4.051	1.0576e-05	0.0026792	-//-
Dendrobium_GLEAN_10111025	590.78	65.026	3.1835	1.9758e-05	0.0043335	sp|Q84T61|HSFA1_ORYSJ Heat stress transcription factor A-1 OS=Oryza sativa subsp. japonica GN=HSFA1 PE=2 SV=1//1.18031e-16
Dendrobium_GLEAN_10111029	318.222	38.2047	3.0582	0.00038744	0.045248	sp|P41151|HFA1A_ARATH Heat stress transcription factor A-1a OS=Arabidopsis thaliana GN=HSFA1A PE=1 SV=2//1.57142e-28
Dendrobium_GLEAN_10113869	2233.58	258.235	3.1126	0.00012032	0.018817	sp|Q0WUQ1|BAG1_ARATH BAG family molecular chaperone regulator 1 OS=Arabidopsis thaliana GN=BAG1 PE=1 SV=1//7.20486e-50
Dendrobium_GLEAN_10114452	1120.62	57.828	4.2764	1.2052e-09	1.4785e-06	sp|P93735|ELIP1_ARATH Early light-induced protein 1, chloroplastic OS=Arabidopsis thaliana GN=ELIP1 PE=1 SV=1//4.15693e-41
Dendrobium_GLEAN_10114838	43.6081	368.073	-3.0773	0.00025258	0.033374	sp|Q9LDX3|UTR4_ARATH UDP-galactose/UDP-glucose transporter 4 OS=Arabidopsis thaliana GN=UTR4 PE=2 SV=1//4.63109e-49
Dendrobium_GLEAN_10115184	751.745	87.2776	3.1066	3.8255e-05	0.007693	sp|A6YIH8|C7D55_HYOMU Premnaspirodiene oxygenase OS=Hyoscyamus muticus GN=CYP71D55 PE=1 SV=1//2.28105e-156
Dendrobium_GLEAN_10116086	482.416	3450.24	-2.8383	2.1049e-06	0.00078869	sp|O82316|TIP41_ARATH Aquaporin TIP4-1 OS=Arabidopsis thaliana GN=TIP4-1 PE=2 SV=1//1.94621e-54
Dendrobium_GLEAN_10116381	13.2223	409.352	-4.9523	4.3467e-08	2.6958e-05	sp|Q6H5X0|RIP2_ORYSJ Putative ripening-related protein 2 OS=Oryza sativa subsp. japonica GN=Os02g0637000 PE=3 SV=1//2.45681e-63
Dendrobium_GLEAN_10121399	9016.28	2233.98	2.0129	0.00029519	0.037828	sp|Q02060|PSBS_SPIOL Photosystem II 22 kDa protein, chloroplastic OS=Spinacia oleracea GN=PSBS PE=1 SV=1//9.84272e-15
Dendrobium_GLEAN_10121504	1248.41	6491.04	-2.3784	0.00017365	0.025187	sp|Q9FJ62|GPDL4_ARATH Glycerophosphodiester phosphodiesterase GDPDL4 OS=Arabidopsis thaliana GN=GDPDL4 PE=1 SV=1//0
Dendrobium_GLEAN_10122541	196.914	11.9507	4.0424	0.00026273	0.034118	sp|Q84R49|GUN10_ORYSJ Endoglucanase 10 OS=Oryza sativa subsp. japonica GN=GLU2 PE=2 SV=1//6.93316e-25
Dendrobium_GLEAN_10122543	244.254	16.7915	3.8626	0.00012397	0.019304	sp|Q84R49|GUN10_ORYSJ Endoglucanase 10 OS=Oryza sativa subsp. japonica GN=GLU2 PE=2 SV=1//3.46046e-111
Dendrobium_GLEAN_10124596	4214.07	904.925	2.2193	0.00016365	0.023929	sp|Q75HP9|AKT2_ORYSJ Potassium channel AKT2 OS=Oryza sativa subsp. japonica GN=Os05g0428700 PE=2 SV=1//0
Dendrobium_GLEAN_10125062	2337.88	30013.9	-3.6824	6.2125e-05	0.010954	sp|Q8H1H9|AMO_ARATH Primary amine oxidase OS=Arabidopsis thaliana GN=At1g62810 PE=2 SV=1//0
Dendrobium_GLEAN_10125615	466.903	33.8215	3.7871	3.3507e-06	0.0011057	sp|Q5FC15|GFT_ASPOF 6(G)-fructosyltransferase OS=Asparagus officinalis GN=FT1 PE=1 SV=1//3.14707e-35
Dendrobium_GLEAN_10126257	391.807	2162.79	-2.4647	7.4273e-05	0.012845	sp|Q9SZ67|WRK19_ARATH Probable WRKY transcription factor 19 OS=Arabidopsis thaliana GN=WRKY19 PE=2 SV=1//1.25283e-34
Dendrobium_GLEAN_10128766	2039.3	235.505	3.1142	2.2571e-06	0.00082848	sp|Q8VY22|TBL38_ARATH Protein trichome birefringence-like 38 OS=Arabidopsis thaliana GN=TBL38 PE=2 SV=1//4.67377e-149
Dendrobium_GLEAN_10130060	575.305	73.32	2.972	0.00017602	0.025359	sp|Q7XKU5|DAO_ORYSJ 2-oxoglutarate-dependent dioxygenase DAO OS=Oryza sativa subsp. japonica GN=DAO PE=2 SV=2//1.61634e-76
Dendrobium_GLEAN_10131499	4030.92	269.099	3.9049	1.233e-09	1.4785e-06	sp|Q9FZ45|Y1686_ARATH Uncharacterized membrane protein At1g16860 OS=Arabidopsis thaliana GN=At1g16860 PE=1 SV=1//8.40062e-13
Dendrobium_GLEAN_10131614	4356.4	609.684	2.837	1.8327e-06	0.00070888	-//-
Dendrobium_GLEAN_10131785	2761.96	332.702	3.0534	8.3073e-07	0.00034747	sp|Q8S7E1|CAO_ORYSJ Chlorophyllide a oxygenase, chloroplastic OS=Oryza sativa subsp. japonica GN=CAO PE=2 SV=1//0
Dendrobium_GLEAN_10135306	5108.33	519.473	3.2977	2.5101e-07	0.00012368	sp|Q9LZ31|C77A4_ARATH Cytochrome P450 77A4 OS=Arabidopsis thaliana GN=CYP77A4 PE=2 SV=1//0
Dendrobium_GLEAN_10135782	4689.82	2.35489	10.96	2.984e-33	1.0734e-28	-//-
Dendrobium_GLEAN_10136544	226.157	16.1813	3.8049	0.00026416	0.034181	sp|O04011|ABP20_PRUPE Auxin-binding protein ABP20 OS=Prunus persica GN=ABP20 PE=2 SV=1//1.1241e-61
Dendrobium_GLEAN_10137837	542.483	51.9453	3.3845	1.7658e-05	0.00402	sp|P81393|MYB08_ANTMA Myb-related protein 308 OS=Antirrhinum majus GN=MYB308 PE=2 SV=1//1.89436e-91
Dendrobium_GLEAN_10140150	1365.34	226.112	2.5942	0.00018669	0.02613	sp|Q9FJZ9|PER72_ARATH Peroxidase 72 OS=Arabidopsis thaliana GN=PER72 PE=1 SV=1//2.49608e-157
Dendrobium_GLEAN_10142218	222.745	1092.87	-2.2947	0.00041734	0.048115	sp|Q42602|C89A2_ARATH Cytochrome P450 89A2 OS=Arabidopsis thaliana GN=CYP89A2 PE=2 SV=2//8.47501e-140
Novel00022	388.063	23.3341	4.0558	6.0844e-06	0.0018088	--	hypothetical protein EUTSA_v10016785mg [Eutrema salsugineum]>gi|557111720|gb|ESQ52004.1| hypothetical protein EUTSA_v10016785mg [Eutrema salsugineum]
Novel00216	1.57281	98.2566	-5.9651	0.00032546	0.040231	-//-
Novel00263	418.965	49.483	3.0818	0.00025902	0.034004	-//-
Novel00274	16.1906	239.811	-3.8887	9.0772e-05	0.015169	-//-
Novel00355	11.506	232.219	-4.335	4.3547e-05	0.0084333	--	PREDICTED: 70 kDa peptidyl-prolyl isomerase-like [Oryza brachyantha]
Novel00417	131.309	1.46107	6.4898	2.4323e-05	0.0052391	--	hypothetical protein VITISV_044371 [Vitis vinifera]
Novel00446	1713.52	9909.56	-2.5319	8.0804e-06	0.0021691	-//-
Novel00814	853.52	5682.56	-2.735	0.00026268	0.034118	--	unnamed protein product [Vitis vinifera]
Novel00837	0.442539	357.886	-9.6595	1.0516e-12	2.5218e-09	--	PREDICTED: probable aldo-keto reductase 2 [Elaeis guineensis]
Novel00889	0	67.5142	#NAME?	0.00037019	0.043803	-//-
Novel01091	238.08	3357.64	-3.8179	1.1026e-09	1.4165e-06	-//-
Novel01201	0	149.355	#NAME?	1.3807e-07	7.0951e-05	-//-
Novel01268	1.04854	209.102	-7.6397	2.7696e-08	1.9925e-05	--	PREDICTED: uncharacterized protein LOC100838519 [Brachypodium distachyon]
Novel01298	194.312	3038.58	-3.9669	3.2122e-10	4.8145e-07	-//-
Novel01495	7.96571	295.544	-5.2134	5.2884e-07	0.00024509	--	PREDICTED: uncharacterized protein LOC101261386 [Solanum lycopersicum]
Novel01760	0	98.3877	#NAME?	1.9296e-05	0.0042582	--	PREDICTED: uncharacterized protein LOC103722988 [Phoenix dactylifera]
Novel01882	37485.8	6104.41	2.6184	1.7854e-06	0.00069806	-//-
Novel02127	295.59	3.53233	6.3868	5.8277e-09	5.5166e-06	-//-
Novel02165	1431.38	278.183	2.3633	0.00015115	0.022749	--	Uncharacterized protein TCM_036439 [Theobroma cacao]>gi|508725394|gb|EOY17291.1| Uncharacterized protein TCM_036439 [Theobroma cacao]
Novel02190	32.5047	335.018	-3.3655	5.9937e-05	0.010726	--	hypothetical protein PRUPE_ppa017790mg [Prunus persica]>gi|462405925|gb|EMJ11389.1| hypothetical protein PRUPE_ppa017790mg [Prunus persica]
Novel02495	158.83	4.81938	5.0425	8.5423e-05	0.014442	--	Uncharacterized protein TCM_026877 [Theobroma cacao]>gi|508778198|gb|EOY25454.1| Uncharacterized protein TCM_026877 [Theobroma cacao]
Novel02510	1873.63	12487.7	-2.7366	3.6332e-06	0.0011774	--	PREDICTED: serine/arginine-rich splicing factor SR45a-like [Eucalyptus grandis]
Novel02596	206.897	1.76617	6.8721	1.1886e-07	6.1963e-05	--	T2E6.4 [Arabidopsis thaliana]
Novel02598	190.14	0.436173	8.7679	4.3199e-08	2.6958e-05	--	PREDICTED: putative disease resistance protein RGA3 [Phoenix dactylifera]>gi|672186508|ref|XP_008813102.1| PREDICTED: putative disease resistance protein RGA3 [Phoenix dactylifera]>gi|672186512|ref|XP_008813103.1| PREDICTED: putative disease resistance protein RGA3 [Phoenix dactylifera]>gi|672186516|ref|XP_008813104.1| PREDICTED: putative disease resistance protein RGA3 [Phoenix dactylifera]
Novel02836	1.40935	362.235	-8.0058	8.8955e-12	1.6841e-08	-//-
Novel02886	23.9928	321.269	-3.7431	5.3255e-05	0.0097737	--	PREDICTED: probable amino acid permease 7 [Elaeis guineensis]
Novel02888	16.7487	345.725	-4.3675	2.3355e-06	0.00083312	--	Retrovirus-related Pol polyprotein from transposon TNT 1-94, partial [Glycine soja]
Novel02899	887.889	1.30852	9.4063	3.6793e-15	1.8907e-11	-//-
Novel03169	3085.56	486.305	2.6656	0.00022759	0.031128	--	OSJNBa0011F23.6-like protein [Hyacinthus orientalis]
Novel03207	0	82.7306	#NAME?	0.00010405	0.016936	-//-
Novel03400	420.586	0.872346	8.9133	3.2943e-13	8.4641e-10	-//-
Novel03582	12437.5	1713.31	2.8598	1.4694e-06	0.0005939	--	PREDICTED: CAS1 domain-containing protein 1-like isoform X1 [Phoenix dactylifera]
Novel03589	186.213	3.53233	5.7202	3.2137e-06	0.0010704	--	PREDICTED: uncharacterized protein LOC105049063 [Elaeis guineensis]>gi|743803376|ref|XP_010926901.1| PREDICTED: uncharacterized protein LOC105049063 [Elaeis guineensis]>gi|743803380|ref|XP_010926902.1| PREDICTED: uncharacterized protein LOC105049063 [Elaeis guineensis]
Novel03896	0	418.944	#NAME?	2.2894e-06	0.00083185	--	PREDICTED: glucose-induced degradation protein 8 homolog [Elaeis guineensis]
Novel04027	347.361	4.66683	6.2179	4.3696e-09	4.2481e-06	--	PREDICTED: catalase isozyme A-like isoform X2 [Musa acuminata subsp. malaccensis]
Novel04092	978.091	155.988	2.6485	0.00011589	0.018284	--	Retrotransposon protein, putative [Theobroma cacao]>gi|508711181|gb|EOY03078.1| Retrotransposon protein, putative [Theobroma cacao]
Novel04161	211.879	14.3937	3.8797	0.00034368	0.041209	-//-
Novel04386	1205.87	30.1152	5.3234	5.4256e-05	0.0098567	--	PREDICTED: putative disease resistance protein RGA4 [Musa acuminata subsp. malaccensis]
Novel04419	100.229	0	Inf	5.7592e-05	0.01041	-//-
Novel04489	2.09708	135.112	-6.0096	2.7693e-05	0.0058596	-//-
Novel04539	184.605	0	Inf	1.165e-08	1.0221e-05	-//-
Novel04558	4.47323	276.99	-5.9524	4.7089e-08	2.7907e-05	--	PREDICTED: 40S ribosomal protein S12-like isoform X1 [Phoenix dactylifera]
Novel04604	0	135.686	#NAME?	8.9208e-06	0.0023321	--	PREDICTED: uncharacterized protein LOC103713619 [Phoenix dactylifera]
Novel04626	177.241	0	Inf	6.9882e-06	0.001995	--	PREDICTED: uncharacterized protein LOC103431265 [Malus domestica]
Novel04664	4.75231	135.067	-4.8289	0.00030409	0.038381	-//-
Novel04676	97.3407	0.588722	7.3693	7.9655e-05	0.01358	-//-
Novel04765	364.381	0	Inf	1.3391e-13	4.0141e-10	-//-
Novel04851	288.743	21.7827	3.7285	3.2591e-05	0.0067764	--	Uncharacterized protein TCM_016763 [Theobroma cacao]>gi|508710342|gb|EOY02239.1| Uncharacterized protein TCM_016763 [Theobroma cacao]
Novel05005	0	119.431	#NAME?	2.5287e-06	0.00089178	-//-
Novel05088	318.07	10.9687	4.8579	6.9177e-07	0.00030346	--	PREDICTED: transcription factor TGA2-like isoform X2 [Nelumbo nucifera]
Novel05108	562.009	54.0358	3.3786	0.00024365	0.032601	--	PREDICTED: uncharacterized protein LOC103840341 [Brassica rapa]>gi|685366189|ref|XP_009117161.1| PREDICTED: uncharacterized protein LOC103842291 [Brassica rapa]>gi|685376655|ref|XP_009121244.1| PREDICTED: uncharacterized protein LOC103846076 [Brassica rapa]
Novel05164	106.961	0.588722	7.5053	3.3264e-05	0.0068767	-//-
Novel05219	270.222	24.924	3.4385	0.00018125	0.025769	-//-
Novel05340	0	423.456	#NAME?	1.1759e-07	6.1963e-05	-//-
Novel05350	797.049	4842.26	-2.6029	1.0921e-05	0.0027471	--	putative RNA-directed DNA polymerase (Reverse transcriptase) [Malus domestica]
Novel05376	1132.38	2.35489	8.9095	7.2121e-21	8.6475e-17	--	Strong similarity to gi|3600044 T12H20.12 protease homolog from Arabidopsis thaliana BAC gb|AF080119 and is a member of the reverse transcriptase family PF|00078 [Arabidopsis thaliana]
Novel05851	556.692	3474.09	-2.6417	8.5347e-06	0.0022741	-//-
PEQU_06636-D2	834.743	74.667	3.4828	3.8071e-06	0.0012013	sp|Q54YW1|ELMOA_DICDI ELMO domain-containing protein A OS=Dictyostelium discoideum GN=elmoA PE=1 SV=1//2.82722e-26
PEQU_07911-D2	1573.07	172.385	3.1899	1.1881e-06	0.00048566	sp|Q6R0H1|LHY_ARATH Protein LHY OS=Arabidopsis thaliana GN=LHY PE=1 SV=2//1.88688e-18
PEQU_40816-D2	174.978	1108.86	-2.6638	0.00029551	0.037828	sp|Q680K8|Y1576_ARATH BTB/POZ domain-containing protein At1g55760 OS=Arabidopsis thaliana GN=At1g55760 PE=2 SV=1//1.56254e-117

## Sheet: S3 vs S4
Gene_id	readcount_S3	readcount_S4	log2FoldChange	pval	padj	Blast swiss prot
Dendrobium_GLEAN_10000837	154.285	913.77	-2.5662	7.8982e-05	0.013051	sp|Q8LC69|ATL8_ARATH RING-H2 finger protein ATL8 OS=Arabidopsis thaliana GN=ATL8 PE=2 SV=2//3.13818e-40
Dendrobium_GLEAN_10001224	0.474013	401.995	-9.728	5.1229e-14	1.413e-10	sp|Q9LSS5|ICR3_ARATH Interactor of constitutive active ROPs 3 OS=Arabidopsis thaliana GN=ICR3 PE=1 SV=1//1.71663e-25
Dendrobium_GLEAN_10001448	614.196	29.3757	4.386	4.5336e-08	2.6307e-05	sp|F4I9E1|NFD4_ARATH Protein NUCLEAR FUSION DEFECTIVE 4 OS=Arabidopsis thaliana GN=NFD4 PE=3 SV=1//8.46172e-49
Dendrobium_GLEAN_10002128	1137.61	82.5498	3.7846	5.7251e-08	3.1582e-05	sp|Q9SS03|DIR21_ARATH Dirigent protein 21 OS=Arabidopsis thaliana GN=DIR21 PE=3 SV=1//3.57741e-59
Dendrobium_GLEAN_10002743	2476.78	472.5	2.3901	3.1944e-05	0.0064224	sp|Q8LEA8|EID1_ARATH Phytochrome A-associated F-box protein OS=Arabidopsis thaliana GN=EID1 PE=1 SV=2//1.80998e-122
Dendrobium_GLEAN_10002848	88.5474	689.689	-2.9614	2.3524e-05	0.0050208	sp|Q9FN04|AAP4_ARATH Amino acid permease 4 OS=Arabidopsis thaliana GN=AAP4 PE=1 SV=1//3.19072e-20
Dendrobium_GLEAN_10003360	337.394	1.74435	7.5956	2.1487e-05	0.0047557	sp|P82192|RK5_SPIOL 50S ribosomal protein L5, chloroplastic OS=Spinacia oleracea GN=RPL5 PE=1 SV=2//1.35793e-56
Dendrobium_GLEAN_10004506	0.51422	250.528	-8.9284	5.4493e-10	6.513e-07	-//-
Dendrobium_GLEAN_10007231	30.5146	417.739	-3.775	4.1076e-05	0.0077111	sp|P51419|RL273_ARATH 60S ribosomal protein L27-3 OS=Arabidopsis thaliana GN=RPL27C PE=2 SV=2//1.65317e-76
Dendrobium_GLEAN_10009474	1733.2	391.907	2.1449	0.00016069	0.022684	sp|Q9LJR3|SPA3_ARATH Protein SPA1-RELATED 3 OS=Arabidopsis thaliana GN=SPA3 PE=1 SV=1//2.17707e-146
Dendrobium_GLEAN_10010263	167.752	1042.04	-2.635	3.266e-05	0.00647	sp|O54873|AIMP1_CRIGR Aminoacyl tRNA synthase complex-interacting multifunctional protein 1 OS=Cricetulus griseus GN=AIMP1 PE=2 SV=1//3.32719e-34
Dendrobium_GLEAN_10010642	1099.02	184.888	2.5715	6.1307e-05	0.010705	sp|Q2QTC2|PWD_ORYSJ Phosphoglucan, water dikinase, chloroplastic OS=Oryza sativa subsp. japonica GN=GWD3 PE=3 SV=2//1.40098e-08
Dendrobium_GLEAN_10010697	145.382	0	Inf	3.7741e-07	0.00015555	-//-
Dendrobium_GLEAN_10011002	3.83231	145.261	-5.2443	9.3602e-05	0.014983	sp|Q9XIK3|ISCAP_ARATH Iron-sulfur assembly protein IscA, chloroplastic OS=Arabidopsis thaliana GN=ISCA PE=2 SV=2//8.31372e-22
Dendrobium_GLEAN_10011381	1955.16	412.267	2.2456	0.00013232	0.019524	sp|Q84QK0|OPR1_ORYSJ 12-oxophytodienoate reductase 1 OS=Oryza sativa subsp. japonica GN=OPR1 PE=2 SV=1//1.01837e-156
Dendrobium_GLEAN_10011954	56.3208	403.259	-2.84	0.00039273	0.048558	-//-
Dendrobium_GLEAN_10012117	153.216	6.07312	4.657	0.00021391	0.029164	sp|P05332|YP20_BACLI Uncharacterized N-acetyltransferase p20 OS=Bacillus licheniformis GN=p20 PE=3 SV=1//2.43747e-10
Dendrobium_GLEAN_10012764	573.59	3.61801	7.3087	5.8208e-10	6.7326e-07	sp|Q94DH3|PCL1_ORYSJ Transcription factor PCL1 OS=Oryza sativa subsp. japonica GN=PCL1 PE=2 SV=1//1.56112e-13
Dendrobium_GLEAN_10013367	1703.7	406.011	2.0691	0.00021578	0.029306	sp|Q8VZK9|CSLE1_ARATH Cellulose synthase-like protein E1 OS=Arabidopsis thaliana GN=CSLE1 PE=2 SV=1//8.82147e-119
Dendrobium_GLEAN_10014058	0	372.031	#NAME?	8.2443e-14	1.9707e-10	sp|Q9SD39|PMTR_ARATH Probable methyltransferase PMT27 OS=Arabidopsis thaliana GN=At3g51070 PE=3 SV=1//3.73945e-64
Dendrobium_GLEAN_10015021	40.0435	373.646	-3.222	0.00012346	0.018678	sp|Q9LI74|CHUP1_ARATH Protein CHUP1, chloroplastic OS=Arabidopsis thaliana GN=CHUP1 PE=1 SV=1//3.01674e-52
Dendrobium_GLEAN_10016389	21119	4754.39	2.1512	6.6621e-05	0.01154	sp|Q9SMT7|4CLLA_ARATH Oxalate--CoA ligase OS=Arabidopsis thaliana GN=AAE3 PE=1 SV=1//0
Dendrobium_GLEAN_10016498	304.611	4244.85	-3.8007	4.656e-06	0.0013045	sp|Q9M153|GDL61_ARATH GDSL esterase/lipase At4g01130 OS=Arabidopsis thaliana GN=At4g01130 PE=2 SV=1//1.50672e-22
Dendrobium_GLEAN_10016786	306.663	12623.5	-5.3633	0.00011548	0.017695	sp|P31673|HS174_ORYSJ 17.4 kDa class I heat shock protein OS=Oryza sativa subsp. japonica GN=HSP17.4 PE=2 SV=2//4.99198e-50
Dendrobium_GLEAN_10017596	5577.66	1165.36	2.2589	3.8891e-05	0.0073393	sp|Q39204|MYC2_ARATH Transcription factor MYC2 OS=Arabidopsis thaliana GN=MYC2 PE=1 SV=2//2.22442e-85
Dendrobium_GLEAN_10018898	2314.75	207.523	3.4795	1.8839e-08	1.299e-05	sp|P92973|CCA1_ARATH Protein CCA1 OS=Arabidopsis thaliana GN=CCA1 PE=1 SV=1//2.66155e-15
Dendrobium_GLEAN_10019288	15.6509	347.802	-4.4739	0.00036303	0.045673	sp|P05477|HSP21_SOYBN 17.9 kDa class II heat shock protein OS=Glycine max GN=HSP17.9-D PE=3 SV=1//2.06615e-34
Dendrobium_GLEAN_10019385	30.7728	334.82	-3.4437	5.9055e-05	0.010483	-//-
Dendrobium_GLEAN_10019829	3018.76	711.719	2.0846	0.00015825	0.022566	-//-
Dendrobium_GLEAN_10020186	1918.4	426.537	2.1692	0.00012926	0.019201	sp|Q84MB6|DIOX2_ARATH Probable 2-oxoglutarate-dependent dioxygenase At3g49630 OS=Arabidopsis thaliana GN=At3g50210 PE=2 SV=1//3.5567e-27
Dendrobium_GLEAN_10020559	6077.82	790.389	2.9429	1.2365e-07	5.9374e-05	sp|Q5Z9S8|AB42G_ORYSJ ABC transporter G family member 42 OS=Oryza sativa subsp. japonica GN=ABCG42 PE=2 SV=1//5.20127e-31
Dendrobium_GLEAN_10020688	0	83.9044	#NAME?	9.7691e-05	0.015363	sp|Q9C5S8|CRK5_ARATH Cysteine-rich receptor-like protein kinase 5 OS=Arabidopsis thaliana GN=CRK5 PE=1 SV=1//3.56019e-36
Dendrobium_GLEAN_10020692	1.02844	145.37	-7.1431	9.7625e-05	0.015363	sp|Q9SZW4|HMA2_ARATH Cadmium/zinc-transporting ATPase HMA2 OS=Arabidopsis thaliana GN=HMA2 PE=2 SV=1//1.44048e-100
Dendrobium_GLEAN_10020713	944.509	182.233	2.3738	8.5691e-05	0.013951	-//-
Dendrobium_GLEAN_10021221	2296.5	346.879	2.7269	2.7302e-06	0.00086633	-//-
Dendrobium_GLEAN_10021536	703.241	37.9895	4.2103	2.8255e-08	1.8091e-05	sp|Q9FU27|C3H2_ORYSJ Zinc finger CCCH domain-containing protein 2 OS=Oryza sativa subsp. japonica GN=Os01g0192000 PE=2 SV=1//1.25333e-114
Dendrobium_GLEAN_10022440	258.018	15.6991	4.0387	2.1472e-05	0.0047557	-//-
Dendrobium_GLEAN_10022847	17443.7	3847.48	2.1807	5.2382e-05	0.009391	sp|Q9LVE0|PTR33_ARATH Protein NRT1/ PTR FAMILY 6.4 OS=Arabidopsis thaliana GN=NPF6.4 PE=1 SV=1//0
Dendrobium_GLEAN_10023426	131.492	1177.85	-3.1631	6.8884e-07	0.00025999	sp|Q5ZK33|LETM1_CHICK LETM1 and EF-hand domain-containing protein 1, mitochondrial OS=Gallus gallus GN=LETM1 PE=2 SV=1//6.63637e-18
Dendrobium_GLEAN_10023511	106.93	818.554	-2.9364	7.2792e-05	0.012311	sp|Q1EPG7|CSPL1_MUSAC CASP-like protein 1E1 OS=Musa acuminata GN=MA4_106O17.50 PE=2 SV=1//2.59461e-33
Dendrobium_GLEAN_10023565	3552.25	538.207	2.7225	0.00035	0.044502	-//-
Dendrobium_GLEAN_10024241	810.664	158.203	2.3573	0.00032464	0.04206	sp|Q9SK03|RAP27_ARATH Ethylene-responsive transcription factor RAP2-7 OS=Arabidopsis thaliana GN=RAP2-7 PE=2 SV=2//4.91144e-93
Dendrobium_GLEAN_10024322	168.827	10146	-5.9092	4.7806e-16	1.9239e-12	sp|P31673|HS174_ORYSJ 17.4 kDa class I heat shock protein OS=Oryza sativa subsp. japonica GN=HSP17.4 PE=2 SV=2//1.57424e-58
Dendrobium_GLEAN_10024789	152.605	5.47026	4.802	0.00022018	0.029791	sp|O64474|HMA4_ARATH Putative cadmium/zinc-transporting ATPase HMA4 OS=Arabidopsis thaliana GN=HMA4 PE=1 SV=2//1.62288e-94
Dendrobium_GLEAN_10025075	474.86	76.8611	2.6272	0.00034131	0.04382	sp|Q0WUR5|FAB1A_ARATH 1-phosphatidylinositol-3-phosphate 5-kinase FAB1A OS=Arabidopsis thaliana GN=FAB1A PE=2 SV=1//3.40266e-94
Dendrobium_GLEAN_10025294	306.363	28.7942	3.4114	0.0002256	0.030296	sp|Q8GWP0|MYB39_ARATH Transcription factor MYB39 OS=Arabidopsis thaliana GN=MYB39 PE=2 SV=1//3.42012e-69
Dendrobium_GLEAN_10025842	4436.17	473.879	3.2267	1.8833e-05	0.0043012	sp|Q7Y232|U73B4_ARATH UDP-glycosyltransferase 73B4 OS=Arabidopsis thaliana GN=UGT73B4 PE=2 SV=1//1.97929e-45
Dendrobium_GLEAN_10025889	10622.4	1706.48	2.638	2.8793e-06	0.00088999	sp|Q9SZN7|HIP26_ARATH Heavy metal-associated isoprenylated plant protein 26 OS=Arabidopsis thaliana GN=HIPP26 PE=1 SV=1//2.88961e-55
Dendrobium_GLEAN_10026202	1934.63	179.786	3.4277	6.3089e-08	3.4274e-05	sp|O24312|TCMO_POPTM Trans-cinnamate 4-monooxygenase OS=Populus tremuloides GN=CYP73A13 PE=2 SV=1//2.1209e-169
Dendrobium_GLEAN_10026322	567.239	40.4883	3.8084	1.9407e-05	0.0044041	sp|Q84TG3|PUB23_ARATH E3 ubiquitin-protein ligase PUB23 OS=Arabidopsis thaliana GN=PUB23 PE=1 SV=1//1.42024e-49
Dendrobium_GLEAN_10027016	501.737	9.23899	5.7631	2.4233e-10	3.2181e-07	sp|F4KGY6|RVE1_ARATH Protein REVEILLE 1 OS=Arabidopsis thaliana GN=RVE1 PE=2 SV=1//1.7919e-33
Dendrobium_GLEAN_10027094	101.306	655.993	-2.695	7.8951e-05	0.013051	sp|Q9MAH1|TTL1_ARATH TPR repeat-containing thioredoxin TTL1 OS=Arabidopsis thaliana GN=TTL1 PE=1 SV=1//0
Dendrobium_GLEAN_10027773	498.662	2368.77	-2.248	5.9863e-05	0.010522	sp|Q88FY2|6HN3M_PSEPK 6-hydroxynicotinate 3-monooxygenase OS=Pseudomonas putida (strain KT2440) GN=nicC PE=1 SV=1//4.67816e-14
Dendrobium_GLEAN_10027775	89.104	565.388	-2.6657	0.00013395	0.019685	-//-
Dendrobium_GLEAN_10027970	192.295	4.07015	5.5621	3.6192e-06	0.0010637	sp|Q39214|RPM1_ARATH Disease resistance protein RPM1 OS=Arabidopsis thaliana GN=RPM1 PE=1 SV=1//6.58906e-08
Dendrobium_GLEAN_10028373	221.813	2680.46	-3.5951	2.5223e-08	1.6484e-05	-//-
Dendrobium_GLEAN_10028541	2641.64	157.817	4.0651	5.344e-06	0.0014592	sp|Q67VS7|CSLA9_ORYSJ Probable mannan synthase 9 OS=Oryza sativa subsp. japonica GN=CSLA9 PE=2 SV=1//0
Dendrobium_GLEAN_10029083	1222.75	287.76	2.0872	0.00037733	0.046978	sp|Q0WPR4|SCP34_ARATH Serine carboxypeptidase-like 34 OS=Arabidopsis thaliana GN=SCPL34 PE=2 SV=2//0
Dendrobium_GLEAN_10029342	4693.2	940.934	2.3184	3.2062e-05	0.0064224	sp|Q69LA1|PROT2_ORYSJ Probable proline transporter 2 OS=Oryza sativa subsp. japonica GN=LOC_Os07g01090 PE=2 SV=1//0
Dendrobium_GLEAN_10029817	497.212	8.70034	5.8366	9.2844e-11	1.3871e-07	sp|F4KGY6|RVE1_ARATH Protein REVEILLE 1 OS=Arabidopsis thaliana GN=RVE1 PE=2 SV=1//2.96476e-14
Dendrobium_GLEAN_10030178	119.157	0.58145	7.679	1.5157e-05	0.0035992	sp|P40781|CYPR4_CYNCA Protein CYPRO4 OS=Cynara cardunculus GN=CYPRO4 PE=2 SV=1//0
Dendrobium_GLEAN_10030493	199.799	4.47948	5.4791	5.2959e-06	0.0014592	-//-
Dendrobium_GLEAN_10031517	4381.21	442.893	3.3063	1.9612e-08	1.3268e-05	sp|O22307|C71DB_LOTJA Cytochrome P450 71D11 (Fragment) OS=Lotus japonicus GN=CYP71D11 PE=2 SV=1//6.91543e-62
Dendrobium_GLEAN_10032180	76.9383	2248.11	-4.8689	2.5846e-05	0.0053568	sp|P09886|HS21C_PEA Small heat shock protein, chloroplastic OS=Pisum sativum GN=HSP21 PE=2 SV=1//1.41176e-32
Dendrobium_GLEAN_10032195	85.7583	883.355	-3.3646	1.3167e-05	0.00319	sp|P43309|PPO_MALDO Polyphenol oxidase, chloroplastic OS=Malus domestica PE=2 SV=1//0
Dendrobium_GLEAN_10032525	407.074	34.0487	3.5796	2.1431e-05	0.0047557	sp|Q7DNC3|MPCP1_ARATH Mitochondrial phosphate carrier protein 1, mitochondrial OS=Arabidopsis thaliana GN=MPT1 PE=2 SV=1//5.97309e-143
Dendrobium_GLEAN_10033113	250.156	3493.08	-3.8036	1.486e-10	2.0493e-07	sp|Q9M9M4|CSLD3_ARATH Cellulose synthase-like protein D3 OS=Arabidopsis thaliana GN=CSLD3 PE=1 SV=1//0
Dendrobium_GLEAN_10033206	2133.09	71.5424	4.898	1.3441e-13	2.835e-10	sp|B3H5A8|RVE7_ARATH Protein REVEILLE 7 OS=Arabidopsis thaliana GN=RVE7 PE=2 SV=1//1.46483e-36
Dendrobium_GLEAN_10033571	24.5937	293.813	-3.5785	9.557e-05	0.01523	sp|Q948Z4|SNAK1_SOLTU Snakin-1 OS=Solanum tuberosum GN=SN1 PE=1 SV=1//1.58699e-28
Dendrobium_GLEAN_10033600	1392.05	131.241	3.4069	2.4984e-05	0.0052354	sp|Q93ZL5|CDF2_ARATH Cyclic dof factor 2 OS=Arabidopsis thaliana GN=CDF2 PE=1 SV=2//5.98461e-66
Dendrobium_GLEAN_10034355	1626.79	39.1533	5.3768	4.617e-06	0.0013045	-//-
Dendrobium_GLEAN_10035338	497.873	43.4179	3.5194	8.2425e-05	0.013495	sp|Q8W191|HYH_ARATH Transcription factor HY5-like OS=Arabidopsis thaliana GN=HYH PE=1 SV=1//2.27925e-24
Dendrobium_GLEAN_10035475	294.61	1325.38	-2.1695	0.00032493	0.04206	sp|Q38910|XTH23_ARATH Probable xyloglucan endotransglucosylase/hydrolase protein 23 OS=Arabidopsis thaliana GN=XTH23 PE=2 SV=1//7.26392e-102
Dendrobium_GLEAN_10036506	270.158	3.44589	6.2928	6.6914e-08	3.581e-05	sp|Q9SV72|EPFL9_ARATH EPIDERMAL PATTERNING FACTOR-like protein 9 OS=Arabidopsis thaliana GN=EPFL9 PE=1 SV=1//6.51493e-24
Dendrobium_GLEAN_10036580	325.81	13.3956	4.6042	1.9251e-06	0.00063914	sp|Q9FS10|PSK_ASPOF Phytosulfokines OS=Asparagus officinalis GN=PSK PE=1 SV=1//2.82547e-11
Dendrobium_GLEAN_10036695	430.228	8.80825	5.6101	2.3332e-09	2.1451e-06	sp|O04203|HSPR2_ARATH Nematode resistance protein-like HSPRO2 OS=Arabidopsis thaliana GN=HSPRO2 PE=1 SV=1//7.38976e-122
Dendrobium_GLEAN_10036906	33.7121	462.401	-3.7778	2.7681e-06	0.00087063	sp|Q5ZK33|LETM1_CHICK LETM1 and EF-hand domain-containing protein 1, mitochondrial OS=Gallus gallus GN=LETM1 PE=2 SV=1//5.45273e-56
Dendrobium_GLEAN_10036909	2170.87	376.523	2.5275	3.2428e-06	0.00098537	sp|Q5ZK33|LETM1_CHICK LETM1 and EF-hand domain-containing protein 1, mitochondrial OS=Gallus gallus GN=LETM1 PE=2 SV=1//9.22201e-18
Dendrobium_GLEAN_10037020	4824.38	26345	-2.4491	2.4487e-05	0.0051648	sp|P24805|TSJT1_TOBAC Stem-specific protein TSJT1 OS=Nicotiana tabacum GN=TSJT1 PE=2 SV=1//2.58487e-32
Dendrobium_GLEAN_10038144	12284.8	1475.29	3.0578	7.2263e-08	3.8104e-05	sp|Q9XED8|ARFI_ARATH Auxin response factor 9 OS=Arabidopsis thaliana GN=ARF9 PE=1 SV=1//0
Dendrobium_GLEAN_10038951	1583.59	123.852	3.6765	5.6908e-08	3.1582e-05	sp|Q9LJR3|SPA3_ARATH Protein SPA1-RELATED 3 OS=Arabidopsis thaliana GN=SPA3 PE=1 SV=1//1.25529e-162
Dendrobium_GLEAN_10039122	228.661	16.0657	3.8312	0.00014323	0.020876	-//-
Dendrobium_GLEAN_10039652	719.967	143.472	2.3272	0.00039507	0.048638	sp|Q9LS40|ASPG1_ARATH Protein ASPARTIC PROTEASE IN GUARD CELL 1 OS=Arabidopsis thaliana GN=ASPG1 PE=1 SV=1//1.86871e-39
Dendrobium_GLEAN_10040642	803.131	3971.29	-2.3059	2.0216e-05	0.0045588	sp|Q8L9P8|RLF33_ARATH Protein RALF-like 33 OS=Arabidopsis thaliana GN=RALFL33 PE=2 SV=1//4.95166e-32
Dendrobium_GLEAN_10040670	943.877	47.8117	4.3032	6.8458e-09	5.3749e-06	sp|P21342|PFPA_SOLTU Pyrophosphate--fructose 6-phosphate 1-phosphotransferase subunit alpha OS=Solanum tuberosum GN=PFP-ALPHA PE=1 SV=2//9.09942e-119
Dendrobium_GLEAN_10040821	16415.1	246.881	6.0551	4.2421e-05	0.007881	sp|Q8RXN0|AB11G_ARATH ABC transporter G family member 11 OS=Arabidopsis thaliana GN=ABCG11 PE=1 SV=1//4.34864e-48
Dendrobium_GLEAN_10040986	2849.23	611.631	2.2198	0.00013789	0.02018	sp|Q5NA18|MTP5_ORYSJ Metal tolerance protein 5 OS=Oryza sativa subsp. japonica GN=MTP5 PE=2 SV=1//5.80281e-35
Dendrobium_GLEAN_10042129	31.1579	7134.61	-7.8391	9.4265e-29	3.38e-24	sp|P05477|HSP21_SOYBN 17.9 kDa class II heat shock protein OS=Glycine max GN=HSP17.9-D PE=3 SV=1//1.30249e-57
Dendrobium_GLEAN_10042205	0	114.851	#NAME?	5.3719e-06	0.0014592	sp|Q0D5B9|SAP16_ORYSJ Zinc finger AN1 and C2H2 domain-containing stress-associated protein 16 OS=Oryza sativa subsp. japonica GN=SAP16 PE=2 SV=2//1.88621e-111
Dendrobium_GLEAN_10043315	172.877	1.87366	6.5277	2.8515e-06	0.00088908	sp|Q9FGM1|PYL8_ARATH Abscisic acid receptor PYL8 OS=Arabidopsis thaliana GN=PYL8 PE=1 SV=1//1.41996e-88
Dendrobium_GLEAN_10043531	19709	4058.9	2.2797	2.1828e-05	0.0047724	sp|Q9SGP2|HSL1_ARATH Receptor-like protein kinase HSL1 OS=Arabidopsis thaliana GN=HSL1 PE=2 SV=1//0
Dendrobium_GLEAN_10043656	528.747	3081.84	-2.5431	7.0409e-06	0.0018566	sp|Q5Z859|MPK4_ORYSJ Mitogen-activated protein kinase 4 OS=Oryza sativa subsp. japonica GN=MPK4 PE=2 SV=1//0
Dendrobium_GLEAN_10043735	2233.02	514.431	2.1179	0.00020741	0.028385	sp|Q9SYD6|MATE1_ARATH MATE efflux family protein 1 OS=Arabidopsis thaliana GN=MATE PE=2 SV=2//4.12376e-52
Dendrobium_GLEAN_10044043	4283.77	365.162	3.5523	9.6931e-10	9.6543e-07	sp|Q7XWK5|SAG39_ORYSJ Senescence-specific cysteine protease SAG39 OS=Oryza sativa subsp. japonica GN=SAG39 PE=2 SV=2//2.72909e-117
Dendrobium_GLEAN_10044045	922.65	79.4232	3.5382	1.2062e-07	5.9246e-05	sp|Q7XWK5|SAG39_ORYSJ Senescence-specific cysteine protease SAG39 OS=Oryza sativa subsp. japonica GN=SAG39 PE=2 SV=2//6.08382e-24
Dendrobium_GLEAN_10044117	160.39	6.48245	4.6289	0.00022274	0.030025	sp|Q9LHP1|RL74_ARATH 60S ribosomal protein L7-4 OS=Arabidopsis thaliana GN=RPL7D PE=2 SV=1//2.28987e-124
Dendrobium_GLEAN_10044120	1412.1	9189.85	-2.7022	9.4687e-07	0.00034644	sp|Q96303|PHT14_ARATH Inorganic phosphate transporter 1-4 OS=Arabidopsis thaliana GN=PHT1-4 PE=1 SV=1//0
Dendrobium_GLEAN_10044232	2655.46	367.431	2.8534	1.6348e-06	0.00056362	sp|Q9LSE7|B561C_ARATH Cytochrome b561 and DOMON domain-containing protein At3g25290 OS=Arabidopsis thaliana GN=At3g25290 PE=2 SV=1//1.41886e-120
Dendrobium_GLEAN_10044295	3073.82	467.914	2.7157	2.6032e-06	0.00084089	sp|Q69LA6|PDX11_ORYSJ Probable pyridoxal 5&apos;-phosphate synthase subunit PDX1.1 OS=Oryza sativa subsp. japonica GN=PDX11 PE=2 SV=1//0
Dendrobium_GLEAN_10045158	500.818	2643.77	-2.4002	3.2615e-05	0.00647	sp|Q9M0G0|GAGT3_ARATH Gamma-glutamyltranspeptidase 3 OS=Arabidopsis thaliana GN=GGT3 PE=2 SV=1//0
Dendrobium_GLEAN_10046548	741.24	71.3069	3.3778	3.5351e-06	0.0010555	sp|P54771|TYDC5_PAPSO Tyrosine/DOPA decarboxylase 5 OS=Papaver somniferum GN=TYDC5 PE=2 SV=1//1.54887e-154
Dendrobium_GLEAN_10047715	1276.52	235.756	2.4368	7.9863e-05	0.013136	sp|Q7XLC6|HAK11_ORYSJ Probable potassium transporter 11 OS=Oryza sativa subsp. japonica GN=HAK11 PE=2 SV=3//9.4145e-52
Dendrobium_GLEAN_10047718	6260.13	1326.16	2.2389	2.7587e-05	0.0056848	sp|Q7XLC6|HAK11_ORYSJ Probable potassium transporter 11 OS=Oryza sativa subsp. japonica GN=HAK11 PE=2 SV=3//0
Dendrobium_GLEAN_10049220	89.3917	517.877	-2.5344	0.00040433	0.04948	-//-
Dendrobium_GLEAN_10051326	312.214	0.430736	9.5015	1.3939e-11	2.3185e-08	sp|Q9ASS7|CAAT2_ARATH Cationic amino acid transporter 2, vacuolar OS=Arabidopsis thaliana GN=CAT2 PE=2 SV=1//1.91322e-146
Dendrobium_GLEAN_10051330	6917.04	1295.71	2.4164	1.0211e-05	0.0025426	sp|Q38J50|FOMT2_WHEAT Tricetin 3&apos;,4&apos;,5&apos;-O-trimethyltransferase OS=Triticum aestivum GN=OMT2 PE=1 SV=1//5.58866e-171
Dendrobium_GLEAN_10052240	905.061	131.453	2.7835	1.2579e-05	0.0030894	sp|Q9AT54|SCGT_TOBAC Scopoletin glucosyltransferase OS=Nicotiana tabacum GN=TOGT1 PE=1 SV=1//1.42631e-141
Dendrobium_GLEAN_10052334	285.517	1285.61	-2.1708	0.0003323	0.04286	sp|Q6EP77|DRE1G_ORYSJ Dehydration-responsive element-binding protein 1G OS=Oryza sativa subsp. japonica GN=DREB1G PE=2 SV=1//9.51626e-48
Dendrobium_GLEAN_10052432	93.6239	2696.55	-4.8481	6.398e-14	1.6386e-10	sp|Q6AWW5|Y5262_ARATH Ankyrin repeat-containing protein At5g02620 OS=Arabidopsis thaliana GN=At5g02620 PE=1 SV=1//2.19884e-25
Dendrobium_GLEAN_10052434	21.155	446.911	-4.4009	2.4644e-07	0.0001052	sp|Q9C7A2|Y3236_ARATH Ankyrin repeat-containing protein At3g12360 OS=Arabidopsis thaliana GN=At3g12360 PE=2 SV=1//1.66568e-07
Dendrobium_GLEAN_10054542	4294.37	682.488	2.6536	4.6932e-06	0.0013045	sp|Q689G6|PRR95_ORYSJ Two-component response regulator-like PRR95 OS=Oryza sativa subsp. japonica GN=PRR95 PE=2 SV=1//1.33066e-78
Dendrobium_GLEAN_10054725	0.474013	137.657	-8.1819	2.9534e-06	0.00090511	sp|Q8S8N9|GOGC1_ARATH Golgin candidate 1 OS=Arabidopsis thaliana GN=GC1 PE=2 SV=2//2.09271e-27
Dendrobium_GLEAN_10055214	10889	2538.05	2.1011	6.7924e-05	0.011663	sp|Q948P6|FRI3_SOYBN Ferritin-3, chloroplastic OS=Glycine max PE=2 SV=1//6.8263e-91
Dendrobium_GLEAN_10055956	399.136	1.1629	8.423	1.0392e-07	5.1752e-05	sp|O81004|Y2287_ARATH GTP-binding protein At2g22870 OS=Arabidopsis thaliana GN=EMB2001 PE=2 SV=2//4.80664e-22
Dendrobium_GLEAN_10056108	1119.57	4251.27	-1.9249	0.00029857	0.039071	-//-
Dendrobium_GLEAN_10056886	21.8215	672.308	-4.9453	4.8507e-10	5.9975e-07	sp|Q9LNU1|CRSP_ARATH CO(2)-response secreted protease OS=Arabidopsis thaliana GN=CRSP PE=2 SV=1//0
Dendrobium_GLEAN_10057390	2268.62	43.458	5.7061	0.0001061	0.016574	sp|Q9M667|RPP13_ARATH Disease resistance protein RPP13 OS=Arabidopsis thaliana GN=RPP13 PE=2 SV=2//1.75311e-46
Dendrobium_GLEAN_10058365	0	218.309	#NAME?	9.3802e-10	9.6096e-07	sp|P49249|IN22_MAIZE IN2-2 protein OS=Zea mays GN=IN2-2 PE=2 SV=1//2.70486e-51
Dendrobium_GLEAN_10059033	250.903	11.8876	4.3996	0.0001599	0.022662	sp|Q9LF37|CLPB3_ARATH Chaperone protein ClpB3, chloroplastic OS=Arabidopsis thaliana GN=CLPB3 PE=2 SV=1//1.27567e-46
Dendrobium_GLEAN_10059301	1174.39	209.324	2.4881	2.3232e-05	0.0049881	-//-
Dendrobium_GLEAN_10059321	262.351	1587.09	-2.5968	2.4426e-05	0.0051648	sp|Q9SCZ4|FERON_ARATH Receptor-like protein kinase FERONIA OS=Arabidopsis thaliana GN=FER PE=1 SV=1//0
Dendrobium_GLEAN_10059880	470.716	40.3145	3.5455	4.5225e-05	0.0082735	sp|Q5JJY5|SWT2A_ORYSJ Bidirectional sugar transporter SWEET2a OS=Oryza sativa subsp. japonica GN=SWEET2A PE=2 SV=1//2.74282e-90
Dendrobium_GLEAN_10062380	0	96.1149	#NAME?	3.0417e-05	0.0062116	-//-
Dendrobium_GLEAN_10062452	185.629	0.58145	8.3186	2.2687e-07	9.936e-05	sp|Q55909|Y305_SYNY3 TVP38/TMEM64 family membrane protein slr0305 OS=Synechocystis sp. (strain PCC 6803 / Kazusa) GN=slr0305 PE=3 SV=1//1.96111e-24
Dendrobium_GLEAN_10063635	653.772	3678.79	-2.4924	4.8092e-05	0.0086652	sp|Q8LDI5|CXXS1_ARATH Thioredoxin-like protein CXXS1 OS=Arabidopsis thaliana GN=CXXS1 PE=2 SV=2//1.72752e-49
Dendrobium_GLEAN_10064246	1.02844	166.559	-7.3394	8.3029e-07	0.00031011	sp|P49249|IN22_MAIZE IN2-2 protein OS=Zea mays GN=IN2-2 PE=2 SV=1//1.49608e-27
Dendrobium_GLEAN_10064461	933.046	115.068	3.0195	8.0297e-06	0.0020565	sp|Q9FKP1|CCX1_ARATH Cation/calcium exchanger 1 OS=Arabidopsis thaliana GN=CCX1 PE=2 SV=1//4.27739e-115
Dendrobium_GLEAN_10064494	10945.6	1738.15	2.6547	1.9149e-06	0.00063914	sp|Q02283|HAT5_ARATH Homeobox-leucine zipper protein HAT5 OS=Arabidopsis thaliana GN=HAT5 PE=1 SV=1//4.40338e-40
Dendrobium_GLEAN_10064512	971.537	3907	-2.0077	0.00017064	0.023807	sp|Q10S70|EXLA1_ORYSJ Expansin-like A1 OS=Oryza sativa subsp. japonica GN=EXLA1 PE=2 SV=1//1.72904e-99
Dendrobium_GLEAN_10065001	1964.03	471.622	2.0581	9.0273e-05	0.01458	sp|Q96376|LIS_CLABR S-linalool synthase OS=Clarkia breweri GN=LIS PE=2 SV=1//1.71946e-123
Dendrobium_GLEAN_10065487	74.7036	909.847	-3.6064	2.1186e-07	9.639e-05	-//-
Dendrobium_GLEAN_10065762	530.01	51.1266	3.3739	1.0298e-05	0.0025465	sp|Q8LJW3|ACR4_ARATH ACT domain-containing protein ACR4 OS=Arabidopsis thaliana GN=ACR4 PE=2 SV=1//6.50946e-146
Dendrobium_GLEAN_10065772	0	177.455	#NAME?	2.5285e-08	1.6484e-05	-//-
Dendrobium_GLEAN_10065815	766.342	3480.64	-2.1833	0.00012267	0.018638	sp|Q8GT20|BEBT_TOBAC Benzyl alcohol O-benzoyltransferase OS=Nicotiana tabacum GN=HSR201 PE=1 SV=1//0
Dendrobium_GLEAN_10066749	952.46	185.515	2.3601	0.0003702	0.046412	sp|Q52K88|NUD13_ARATH Nudix hydrolase 13, mitochondrial OS=Arabidopsis thaliana GN=NUDT13 PE=1 SV=1//4.62427e-65
Dendrobium_GLEAN_10067132	996.693	51.5359	4.2735	1.8104e-09	1.7545e-06	sp|O49485|SERA1_ARATH D-3-phosphoglycerate dehydrogenase 1, chloroplastic OS=Arabidopsis thaliana GN=PGDH1 PE=1 SV=1//0
Dendrobium_GLEAN_10067937	4117.07	954.311	2.1091	0.00017757	0.024583	sp|Q7X996|CIPK2_ORYSJ CBL-interacting protein kinase 2 OS=Oryza sativa subsp. japonica GN=CIPK2 PE=2 SV=1//0
Dendrobium_GLEAN_10068124	506.654	2110.93	-2.0588	0.00037417	0.046747	sp|Q9ZQB9|CSLCC_ARATH Probable xyloglucan glycosyltransferase 12 OS=Arabidopsis thaliana GN=CSLC12 PE=1 SV=1//0
Dendrobium_GLEAN_10068550	313.319	3838.87	-3.615	8.5128e-10	8.9775e-07	sp|P28583|CDPK_SOYBN Calcium-dependent protein kinase SK5 OS=Glycine max PE=1 SV=1//8.79069e-174
Dendrobium_GLEAN_10068766	990.391	56.9642	4.1199	1.1829e-08	8.8363e-06	-//-
Dendrobium_GLEAN_10069024	3841.63	851.414	2.1738	0.00012821	0.019155	sp|F4I8B9|Y1501_ARATH Putative WEB family protein At1g65010, chloroplastic OS=Arabidopsis thaliana GN=At1g65010 PE=1 SV=1//1.08642e-06
Dendrobium_GLEAN_10069063	2.41027	1958.33	-9.6662	5.4561e-28	9.7817e-24	-//-
Dendrobium_GLEAN_10069222	34.6601	411.853	-3.5708	1.6943e-05	0.0039195	sp|Q9LRJ9|CRR38_ARATH Cysteine-rich repeat secretory protein 38 OS=Arabidopsis thaliana GN=CRRSP38 PE=2 SV=1//1.30504e-40
Dendrobium_GLEAN_10069441	123.127	821.486	-2.7381	4.7924e-05	0.0086652	sp|Q9ZUH1|Y2424_ARATH BTB/POZ domain-containing protein At2g24240 OS=Arabidopsis thaliana GN=At2g24240 PE=2 SV=1//0
Dendrobium_GLEAN_10069867	332.535	0	Inf	5.9883e-13	1.1929e-09	-//-
Dendrobium_GLEAN_10071059	14.1887	297.717	-4.3911	4.1628e-05	0.007774	sp|Q0VCZ3|YTHD2_BOVIN YTH domain-containing family protein 2 OS=Bos taurus GN=YTHDF2 PE=2 SV=1//1.37234e-58
Dendrobium_GLEAN_10071205	84.8039	0	Inf	0.00010696	0.016602	sp|Q9M038|SFC1_ARATH Mitochondrial succinate-fumarate transporter 1 OS=Arabidopsis thaliana GN=SFC1 PE=2 SV=1//4.55331e-06
Dendrobium_GLEAN_10073035	657.793	2806.84	-2.0932	0.00016311	0.022845	sp|Q8L518|CK2_ARATH Probable choline kinase 2 OS=Arabidopsis thaliana GN=At1g74320 PE=2 SV=1//4.76911e-42
Dendrobium_GLEAN_10074935	109.516	0.861473	6.9901	8.599e-05	0.013951	sp|F4JRF4|MUTYH_ARATH A/G-specific adenine DNA glycosylase OS=Arabidopsis thaliana GN=MYH PE=3 SV=1//3.95803e-130
Dendrobium_GLEAN_10075969	2256.05	488.802	2.2065	0.0001168	0.017821	sp|Q05963|FL3H_CALCH Naringenin,2-oxoglutarate 3-dioxygenase OS=Callistephus chinensis GN=FHT PE=2 SV=1//1.54303e-18
Dendrobium_GLEAN_10076125	955.816	178.555	2.4204	0.00016277	0.022845	sp|Q2QWE3|P2C77_ORYSJ Probable protein phosphatase 2C 77 OS=Oryza sativa subsp. japonica GN=Os12g0198200 PE=3 SV=1//3.06655e-87
Dendrobium_GLEAN_10078224	375.048	1612.38	-2.104	0.00027834	0.036557	sp|Q9SVG9|CML42_ARATH Calcium-binding protein CML42 OS=Arabidopsis thaliana GN=CML42 PE=1 SV=1//1.32733e-43
Dendrobium_GLEAN_10078283	897.83	173.647	2.3703	0.00038079	0.047245	sp|Q93XM7|MCAT_ARATH Mitochondrial carnitine/acylcarnitine carrier-like protein OS=Arabidopsis thaliana GN=BOU PE=2 SV=1//1.07066e-167
Dendrobium_GLEAN_10078304	6242.17	433.785	3.847	1.4028e-07	6.6184e-05	sp|Q55680|Y005_SYNY3 Uncharacterized protein sll0005 OS=Synechocystis sp. (strain PCC 6803 / Kazusa) GN=sll0005 PE=3 SV=1//3.98298e-143
Dendrobium_GLEAN_10078762	784.562	93.5929	3.0674	3.4144e-06	0.0010288	sp|Q8VWZ7|C76B6_CATRO Geraniol 8-hydroxylase OS=Catharanthus roseus GN=CYP76B6 PE=1 SV=1//3.87119e-37
Dendrobium_GLEAN_10078763	2076.26	320.748	2.6945	1.4898e-06	0.00052371	sp|D1MI46|C76BA_SWEMU Geraniol 8-hydroxylase OS=Swertia mussotii GN=CYP76B10 PE=1 SV=1//5.00678e-96
Dendrobium_GLEAN_10078993	2294.89	557.806	2.0406	0.00034219	0.04382	sp|Q9LTA3|U91C1_ARATH UDP-glycosyltransferase 91C1 OS=Arabidopsis thaliana GN=UGT91C1 PE=2 SV=1//5.68417e-26
Dendrobium_GLEAN_10079039	15401	520.719	4.8864	4.1994e-16	1.9239e-12	sp|P37117|C71A4_SOLME Cytochrome P450 71A4 OS=Solanum melongena GN=CYP71A4 PE=2 SV=1//5.33891e-126
Dendrobium_GLEAN_10080018	97.361	0	Inf	3.049e-05	0.0062116	-//-
Dendrobium_GLEAN_10082937	849.732	7276.98	-3.0983	3.7113e-08	2.2944e-05	sp|Q9FKW4|CDPKS_ARATH Calcium-dependent protein kinase 28 OS=Arabidopsis thaliana GN=CPK28 PE=1 SV=1//1.58082e-65
Dendrobium_GLEAN_10083716	48622.8	7403.1	2.7154	4.9825e-07	0.00019419	sp|Q9ATM7|PIP23_MAIZE Aquaporin PIP2-3 OS=Zea mays GN=PIP2-3 PE=2 SV=1//5.13031e-179
Dendrobium_GLEAN_10083788	2014.17	269.332	2.9027	1.8358e-06	0.000621	sp|Q9SIV3|GLK1_ARATH Transcription activator GLK1 OS=Arabidopsis thaliana GN=GLK1 PE=1 SV=2//5.13455e-59
Dendrobium_GLEAN_10084642	342.24	2317.5	-2.7595	2.6767e-06	0.00085693	sp|Q9FZ62|PPSP2_ARATH Inorganic pyrophosphatase 2 OS=Arabidopsis thaliana GN=At1g17710 PE=2 SV=1//7.70991e-100
Dendrobium_GLEAN_10085982	155.618	1168.44	-2.9085	4.2998e-06	0.0012334	sp|Q6S4P4|RF2B_ORYSJ Transcription factor RF2b OS=Oryza sativa subsp. japonica GN=RF2b PE=1 SV=2//3.7338e-40
Dendrobium_GLEAN_10086556	1.50245	235.387	-7.2916	1.6598e-08	1.1902e-05	-//-
Dendrobium_GLEAN_10087099	377.837	20367.2	-5.7523	1.7331e-20	2.0715e-16	sp|P31673|HS174_ORYSJ 17.4 kDa class I heat shock protein OS=Oryza sativa subsp. japonica GN=HSP17.4 PE=2 SV=2//1.31213e-49
Dendrobium_GLEAN_10087455	2114.89	338.136	2.6449	5.8809e-06	0.0015855	sp|Q8S7W9|HOX21_ORYSJ Homeobox-leucine zipper protein HOX21 OS=Oryza sativa subsp. japonica GN=HOX21 PE=2 SV=1//2.18256e-87
Dendrobium_GLEAN_10088989	262.322	1283.38	-2.2905	0.00014605	0.021201	sp|A2A1A0|NCS1_COPJA S-norcoclaurine synthase 1 OS=Coptis japonica GN=NCS1 PE=1 SV=1//5.81127e-112
Dendrobium_GLEAN_10089059	5.5358	431.284	-6.2837	6.9609e-11	1.0852e-07	sp|Q942L2|PDI22_ORYSJ Protein disulfide isomerase-like 2-2 OS=Oryza sativa subsp. japonica GN=PDIL2-2 PE=2 SV=1//7.89041e-25
Dendrobium_GLEAN_10089091	32.2816	331.333	-3.3595	0.00010631	0.016574	sp|Q9C7S5|PSYR1_ARATH Tyrosine-sulfated glycopeptide receptor 1 OS=Arabidopsis thaliana GN=PSYR1 PE=2 SV=1//0
Dendrobium_GLEAN_10091097	113.843	841.978	-2.8867	4.3171e-05	0.0079791	-//-
Dendrobium_GLEAN_10091209	190.109	1122.29	-2.5615	3.7431e-05	0.0071012	sp|P16016|CAHC_SPIOL Carbonic anhydrase, chloroplastic OS=Spinacia oleracea PE=1 SV=2//1.47523e-44
Dendrobium_GLEAN_10091675	5874.45	871.506	2.7529	3.9205e-06	0.0011429	sp|O22932|CIPKB_ARATH CBL-interacting serine/threonine-protein kinase 11 OS=Arabidopsis thaliana GN=CIPK11 PE=1 SV=1//5.84553e-139
Dendrobium_GLEAN_10091816	9391.03	861.322	3.4467	2.5049e-09	2.2347e-06	sp|Q9FLE8|Y5986_ARATH Uncharacterized protein At5g39865 OS=Arabidopsis thaliana GN=At5g39865 PE=2 SV=1//3.01191e-17
Dendrobium_GLEAN_10091825	253.798	9.3032	4.7698	2.5448e-06	0.00082953	sp|Q9LT69|SERA3_ARATH D-3-phosphoglycerate dehydrogenase 3, chloroplastic OS=Arabidopsis thaliana GN=PGDH3 PE=1 SV=1//2.00335e-55
Dendrobium_GLEAN_10092575	169.652	2359.73	-3.798	6.0171e-10	6.7422e-07	sp|P31691|ADT_ORYSJ ADP,ATP carrier protein, mitochondrial OS=Oryza sativa subsp. japonica GN=Os02g0718900 PE=2 SV=1//0
Dendrobium_GLEAN_10093325	238.342	6.91319	5.1075	4.66e-06	0.0013045	sp|Q10CQ1|MAD14_ORYSJ MADS-box transcription factor 14 OS=Oryza sativa subsp. japonica GN=MADS14 PE=1 SV=2//2.45308e-14
Dendrobium_GLEAN_10093328	1860.8	139.359	3.739	2.5553e-09	2.2347e-06	-//-
Dendrobium_GLEAN_10093479	854.22	6736.85	-2.9794	7.9674e-08	4.1403e-05	sp|Q39219|AOX1A_ARATH Ubiquinol oxidase 1a, mitochondrial OS=Arabidopsis thaliana GN=AOX1A PE=1 SV=2//1.2466e-164
Dendrobium_GLEAN_10094761	1940.19	403.628	2.2651	9.7158e-05	0.015363	sp|Q9FZ95|PUP3_ARATH Purine permease 3 OS=Arabidopsis thaliana GN=PUP3 PE=2 SV=1//1.25881e-103
Dendrobium_GLEAN_10095332	0	126.328	#NAME?	4.473e-05	0.0082248	-//-
Dendrobium_GLEAN_10095809	49.9491	404.75	-3.0185	0.00014853	0.021475	sp|Q9SJA8|WRK17_ARATH Probable WRKY transcription factor 17 OS=Arabidopsis thaliana GN=WRKY17 PE=2 SV=2//2.44967e-21
Dendrobium_GLEAN_10096781	6463.87	706.093	3.1945	4.3946e-08	2.6262e-05	sp|P92973|CCA1_ARATH Protein CCA1 OS=Arabidopsis thaliana GN=CCA1 PE=1 SV=1//5.76964e-19
Dendrobium_GLEAN_10096782	15915.4	1635.44	3.2827	6.8871e-09	5.3749e-06	sp|Q6R0H1|LHY_ARATH Protein LHY OS=Arabidopsis thaliana GN=LHY PE=1 SV=2//1.17726e-12
Dendrobium_GLEAN_10098456	0	145.346	#NAME?	3.1107e-07	0.00012969	-//-
Dendrobium_GLEAN_10098543	540.045	35.3195	3.9345	8.5104e-07	0.00031459	sp|Q5H7P5|EBM_LILLO Mannosylglycoprotein endo-beta-mannosidase OS=Lilium longiflorum GN=EBM PE=1 SV=4//2.84247e-32
Dendrobium_GLEAN_10098712	305.197	1356.31	-2.1519	0.00035769	0.045319	sp|O23210|SCL15_ARATH Scarecrow-like protein 15 OS=Arabidopsis thaliana GN=SCL15 PE=2 SV=3//1.15338e-52
Dendrobium_GLEAN_10099800	385.379	0	Inf	3.1358e-14	9.3698e-11	-//-
Dendrobium_GLEAN_10100157	352.884	1661.4	-2.2351	0.00012959	0.019201	sp|Q69XJ0|SPX1_ORYSJ SPX domain-containing protein 1 OS=Oryza sativa subsp. japonica GN=SPX1 PE=2 SV=1//6.67974e-103
Dendrobium_GLEAN_10100250	16989.6	3895.48	2.1248	3.3291e-05	0.0065588	sp|Q52QH4|NAC68_ORYSJ NAC domain-containing protein 68 OS=Oryza sativa subsp. japonica GN=NAC68 PE=2 SV=1//2.84233e-115
Dendrobium_GLEAN_10100853	2155.62	462.814	2.2196	0.0001773	0.024583	sp|Q9LZR3|CSLA9_ARATH Glucomannan 4-beta-mannosyltransferase 9 OS=Arabidopsis thaliana GN=CSLA9 PE=2 SV=1//0
Dendrobium_GLEAN_10101420	209.505	1163.09	-2.4729	7.705e-05	0.01285	sp|Q6NQB7|B3GT7_ARATH Beta-1,3-galactosyltransferase 7 OS=Arabidopsis thaliana GN=B3GALT7 PE=2 SV=1//1.42133e-79
Dendrobium_GLEAN_10102164	0	203.668	#NAME?	2.1681e-09	2.0458e-06	sp|Q6L5G1|C3H39_ORYSJ Zinc finger CCCH domain-containing protein 39 OS=Oryza sativa subsp. japonica GN=Os05g0576300 PE=2 SV=1//2.20488e-50
Dendrobium_GLEAN_10102803	53.3561	553.584	-3.3751	7.2808e-06	0.0019055	sp|Q9SJM1|ACR10_ARATH ACT domain-containing protein ACR10 OS=Arabidopsis thaliana GN=ACR10 PE=2 SV=1//1.9294e-162
Dendrobium_GLEAN_10105242	3292.91	329.336	3.3217	4.5489e-08	2.6307e-05	sp|Q6EUG4|HFC2A_ORYSJ Heat stress transcription factor C-2a OS=Oryza sativa subsp. japonica GN=HSFC2A PE=2 SV=1//2.57746e-52
Dendrobium_GLEAN_10105519	0	110.524	#NAME?	6.7192e-06	0.0017979	sp|Q9M7Q4|AI5L5_ARATH ABSCISIC ACID-INSENSITIVE 5-like protein 5 OS=Arabidopsis thaliana GN=ABF2 PE=1 SV=1//2.37107e-67
Dendrobium_GLEAN_10105742	1023.66	161.471	2.6644	9.0079e-06	0.0022587	sp|Q9LSP8|CMTA6_ARATH Calmodulin-binding transcription activator 6 OS=Arabidopsis thaliana GN=CMTA6 PE=2 SV=1//1.08111e-70
Dendrobium_GLEAN_10106010	877.887	31.2922	4.8102	2.2723e-07	9.936e-05	sp|Q19KC1|NIP21_MAIZE Aquaporin NIP2-1 OS=Zea mays GN=NIP2-1 PE=2 SV=2//1.46617e-39
Dendrobium_GLEAN_10107393	8336.15	2143.15	1.9596	0.00030743	0.040084	-//-
Dendrobium_GLEAN_10107596	317.913	1763.19	-2.4715	2.2248e-05	0.0048055	-//-
Dendrobium_GLEAN_10108127	3.59954	199.382	-5.7916	1.7066e-06	0.00058277	sp|Q8LF20|CAP2_ARATH Putative clathrin assembly protein At2g25430 OS=Arabidopsis thaliana GN=At2g25430 PE=1 SV=2//7.64828e-84
Dendrobium_GLEAN_10109220	12.7983	426.244	-5.0576	1.8802e-08	1.299e-05	-//-
Dendrobium_GLEAN_10110605	89.142	570.357	-2.6777	0.00019872	0.0273	sp|Q9FWQ2|TPP2_ORYSJ Probable trehalose-phosphate phosphatase 2 OS=Oryza sativa subsp. japonica GN=TPP2 PE=1 SV=1//1.2259e-140
Dendrobium_GLEAN_10111633	531.621	58.7059	3.1788	1.3953e-05	0.0033353	sp|Q9SHI2|Y1723_ARATH Leucine-rich repeat receptor-like serine/threonine-protein kinase At1g17230 OS=Arabidopsis thaliana GN=At1g17230 PE=2 SV=2//8.00385e-13
Dendrobium_GLEAN_10111634	323.015	23.9474	3.7537	1.603e-05	0.0037498	sp|Q9C9H7|RLP12_ARATH Receptor-like protein 12 OS=Arabidopsis thaliana GN=RLP12 PE=2 SV=2//7.99898e-06
Dendrobium_GLEAN_10113766	7284.55	1124.72	2.6953	4.901e-07	0.00019311	sp|P17407|21KD_DAUCA 21 kDa protein OS=Daucus carota PE=2 SV=1//1.84553e-39
Dendrobium_GLEAN_10113838	45.0736	574.431	-3.6718	1.0993e-06	0.00039026	-//-
Dendrobium_GLEAN_10113869	1853.16	255.03	2.8612	2.2394e-06	0.00073668	sp|Q0WUQ1|BAG1_ARATH BAG family molecular chaperone regulator 1 OS=Arabidopsis thaliana GN=BAG1 PE=1 SV=1//7.20486e-50
Dendrobium_GLEAN_10115182	183.915	0.58145	8.3052	8.1531e-08	4.1762e-05	sp|A6YIH8|C7D55_HYOMU Premnaspirodiene oxygenase OS=Hyoscyamus muticus GN=CYP71D55 PE=1 SV=1//1.35331e-134
Dendrobium_GLEAN_10116086	694.275	3407.4	-2.2951	3.5594e-05	0.0069728	sp|O82316|TIP41_ARATH Aquaporin TIP4-1 OS=Arabidopsis thaliana GN=TIP4-1 PE=2 SV=1//1.94621e-54
Dendrobium_GLEAN_10116381	29.2364	404.273	-3.7895	7.7583e-06	0.0020013	sp|Q6H5X0|RIP2_ORYSJ Putative ripening-related protein 2 OS=Oryza sativa subsp. japonica GN=Os02g0637000 PE=3 SV=1//2.45681e-63
Dendrobium_GLEAN_10117611	110.272	0	Inf	8.7069e-06	0.0021985	sp|Q9SZE8|LBD39_ARATH LOB domain-containing protein 39 OS=Arabidopsis thaliana GN=LBD39 PE=2 SV=1//2.21101e-61
Dendrobium_GLEAN_10124596	4169.73	893.686	2.2221	7.3849e-05	0.012373	sp|Q75HP9|AKT2_ORYSJ Potassium channel AKT2 OS=Oryza sativa subsp. japonica GN=Os05g0428700 PE=2 SV=1//0
Dendrobium_GLEAN_10125792	360.409	1673.25	-2.2149	0.00011266	0.017336	-//-
Dendrobium_GLEAN_10126257	369.123	2135.97	-2.5327	1.7415e-05	0.0040027	sp|Q9SZ67|WRK19_ARATH Probable WRKY transcription factor 19 OS=Arabidopsis thaliana GN=WRKY19 PE=2 SV=1//1.25283e-34
Dendrobium_GLEAN_10128766	2041.84	232.574	3.1341	6.6293e-07	0.00025287	sp|Q8VY22|TBL38_ARATH Protein trichome birefringence-like 38 OS=Arabidopsis thaliana GN=TBL38 PE=2 SV=1//4.67377e-149
Dendrobium_GLEAN_10129149	836.603	3.87663	7.7536	3.1019e-07	0.00012969	sp|B1B1U3|ZSS1_ZINZE Alpha-humulene synthase OS=Zingiber zerumbet GN=ZSS1 PE=1 SV=1//3.58983e-24
Dendrobium_GLEAN_10129603	1695.41	383.228	2.1454	0.0001571	0.022531	sp|Q94KL5|BLH4_ARATH BEL1-like homeodomain protein 4 OS=Arabidopsis thaliana GN=BLH4 PE=1 SV=2//8.5618e-96
Dendrobium_GLEAN_10130253	2191.67	236.116	3.2145	4.0731e-08	2.4754e-05	sp|Q9FMY1|C86B1_ARATH Cytochrome P450 86B1 OS=Arabidopsis thaliana GN=CYP86B1 PE=2 SV=1//0
Dendrobium_GLEAN_10130918	3.91272	147.459	-5.236	6.9426e-05	0.011798	sp|Q9ZQC5|ICR2_ARATH Interactor of constitutive active ROPs 2, chloroplastic OS=Arabidopsis thaliana GN=ICR2 PE=1 SV=1//8.78923e-16
Dendrobium_GLEAN_10131499	1609.86	265.756	2.5988	2.2167e-05	0.0048055	sp|Q9FZ45|Y1686_ARATH Uncharacterized membrane protein At1g16860 OS=Arabidopsis thaliana GN=At1g16860 PE=1 SV=1//8.40062e-13
Dendrobium_GLEAN_10131614	5870.72	602.122	3.2854	6.8955e-09	5.3749e-06	-//-
Dendrobium_GLEAN_10135235	884.892	1.29221	9.4195	3.7218e-20	3.3362e-16	sp|O65154|KIWI_ARATH RNA polymerase II transcriptional coactivator KIWI OS=Arabidopsis thaliana GN=KIWI PE=1 SV=1//3.03337e-12
Dendrobium_GLEAN_10138193	610.699	2410.58	-1.9808	0.00040609	0.049526	sp|Q851F9|EGY3_ORYSJ Probable zinc metalloprotease EGY3, chloroplastic OS=Oryza sativa subsp. japonica GN=EGY3 PE=2 SV=1//0
Dendrobium_GLEAN_10140152	1.46225	185.232	-6.985	4.3127e-07	0.00017572	sp|P04635|LIP_STAHY Lipase OS=Staphylococcus hyicus GN=lip PE=1 SV=1//4.25121e-25
Novel00022	296.645	23.044	3.6863	9.1577e-05	0.014725	--	hypothetical protein EUTSA_v10016785mg [Eutrema salsugineum]>gi|557111720|gb|ESQ52004.1| hypothetical protein EUTSA_v10016785mg [Eutrema salsugineum]
Novel00154	229.873	14.2143	4.0154	0.00018336	0.025287	--	PREDICTED: uncharacterized protein LOC103707634 [Phoenix dactylifera]
Novel00216	0.948026	97.0397	-6.6775	0.00026388	0.034915	-//-
Novel00270	0	159.366	#NAME?	9.3511e-08	4.7224e-05	--	PREDICTED: uncharacterized protein LOC105060200 isoform X1 [Elaeis guineensis]>gi|743857418|ref|XP_010942110.1| PREDICTED: uncharacterized protein LOC105060200 isoform X1 [Elaeis guineensis]
Novel00417	120.67	1.44292	6.3859	7.3433e-05	0.012362	--	hypothetical protein VITISV_044371 [Vitis vinifera]
Novel00446	926.895	9786.54	-3.4003	7.3328e-10	7.9674e-07	-//-
Novel00501	94.8449	0	Inf	3.7276e-05	0.0071012	--	PREDICTED: uncharacterized protein LOC103701628 isoform X2 [Phoenix dactylifera]
Novel00533	324.327	0	Inf	1.0416e-12	1.9656e-09	-//-
Novel00541	3.00491	255.182	-6.4081	3.2107e-08	2.0197e-05	--	PREDICTED: transcription elongation factor B polypeptide 3 [Musa acuminata subsp. malaccensis]>gi|695057220|ref|XP_009416870.1| PREDICTED: transcription elongation factor B polypeptide 3 [Musa acuminata subsp. malaccensis]>gi|695057222|ref|XP_009416872.1| PREDICTED: transcription elongation factor B polypeptide 3 [Musa acuminata subsp. malaccensis]
Novel00770	75.8125	0	Inf	0.00025662	0.034079	-//-
Novel00837	0	353.447	#NAME?	1.3356e-13	2.835e-10	--	PREDICTED: probable aldo-keto reductase 2 [Elaeis guineensis]
Novel01075	6.48383	151.075	-4.5423	0.00026513	0.03495	--	PREDICTED: disease resistance protein RGA2-like [Setaria italica]
Novel01091	538.75	3315.94	-2.6217	3.5621e-06	0.0010555	-//-
Novel01106	206.236	0.58145	8.4704	1.6194e-08	1.185e-05	--	PREDICTED: ankyrin repeat-containing protein At5g02620-like [Phoenix dactylifera]>gi|672180601|ref|XP_008810498.1| PREDICTED: ankyrin repeat-containing protein At5g02620-like [Phoenix dactylifera]
Novel01110	212.663	0.430736	8.9475	1.0029e-08	7.6511e-06	--	PREDICTED: tobamovirus multiplication protein 1 [Fragaria vesca subsp. vesca]
Novel01201	0	147.501	#NAME?	2.3419e-07	0.00010117	-//-
Novel01298	82.5354	3000.9	-5.1842	2.1175e-15	7.5927e-12	-//-
Novel01299	210.413	3703.44	-4.1376	1.6105e-05	0.0037498	-//-
Novel01309	23.1716	256.858	-3.4705	0.00025464	0.034068	--	putative RNA-directed DNA polymerase (Reverse transcriptase) [Malus domestica]
Novel01491	0.51422	119.739	-7.8633	1.3742e-05	0.003307	--	PREDICTED: exportin-T-like isoform X2 [Phoenix dactylifera]
Novel01492	0	379.356	#NAME?	2.9365e-14	9.3698e-11	--	PREDICTED: uncharacterized protein LOC104784146 [Camelina sativa]
Novel01495	18.2939	291.877	-3.9959	2.5114e-05	0.0052354	--	PREDICTED: uncharacterized protein LOC101261386 [Solanum lycopersicum]
Novel01508	22.6087	252.165	-3.4794	0.00025661	0.034079	--	PREDICTED: ras-related protein RABE1c-like [Phoenix dactylifera]
Novel01542	3.04511	328.127	-6.7516	2.2272e-07	9.936e-05	--	hypothetical protein VITISV_018984 [Vitis vinifera]
Novel01760	0	97.169	#NAME?	3.1239e-05	0.0063283	--	PREDICTED: uncharacterized protein LOC103722988 [Phoenix dactylifera]
Novel01783	467.426	0	Inf	4.829e-16	1.9239e-12	--	PREDICTED: uncharacterized protein LOC103633861 [Zea mays]
Novel01977	0	111.577	#NAME?	7.5647e-06	0.0019655	--	PREDICTED: glucose-induced degradation protein 4 homolog isoform X3 [Phoenix dactylifera]
Novel02106	844.205	199.825	2.0789	0.00036189	0.045673	-//-
Novel02190	0.474013	330.859	-9.4471	3.0408e-12	5.4515e-09	--	hypothetical protein PRUPE_ppa017790mg [Prunus persica]>gi|462405925|gb|EMJ11389.1| hypothetical protein PRUPE_ppa017790mg [Prunus persica]
Novel02355	132.728	0.861473	7.2675	1.3023e-05	0.0031766	--	PREDICTED: mitochondrial import inner membrane translocase subunit Tim9 [Elaeis guineensis]
Novel02461	0.948026	163.329	-7.4286	1.0353e-06	0.00037122	-//-
Novel02510	1935.51	12332.9	-2.6717	9.8345e-07	0.00035619	--	PREDICTED: serine/arginine-rich splicing factor SR45a-like [Eucalyptus grandis]
Novel02669	991.289	1.72295	9.1683	5.9312e-09	4.9458e-06	-//-
Novel02886	25.1798	317.287	-3.6554	5.3849e-05	0.009606	--	PREDICTED: probable amino acid permease 7 [Elaeis guineensis]
Novel02888	24.6656	341.433	-3.791	1.5656e-05	0.0036931	--	Retrovirus-related Pol polyprotein from transposon TNT 1-94, partial [Glycine soja]
Novel02899	894.222	1.29221	9.4346	0.0001586	0.022566	-//-
Novel03544	1.54266	120.494	-6.2874	6.1505e-05	0.010705	--	PREDICTED: uncharacterized protein LOC105052398 [Elaeis guineensis]
Novel03559	2728.35	390.41	2.805	0.00011194	0.0173	--	hypothetical protein TRIUR3_35433 [Triticum urartu]
Novel03576	2.05688	110.801	-5.7514	0.00034997	0.044502	-//-
Novel03582	9562.77	1692.02	2.4987	8.2903e-06	0.0021082	--	PREDICTED: CAS1 domain-containing protein 1-like isoform X1 [Phoenix dactylifera]
Novel03589	188.975	3.4887	5.7594	3.6437e-05	0.0069865	--	PREDICTED: uncharacterized protein LOC105049063 [Elaeis guineensis]>gi|743803376|ref|XP_010926901.1| PREDICTED: uncharacterized protein LOC105049063 [Elaeis guineensis]>gi|743803380|ref|XP_010926902.1| PREDICTED: uncharacterized protein LOC105049063 [Elaeis guineensis]
Novel03701	151.809	0	Inf	2.1237e-07	9.639e-05	--	PREDICTED: vacuole membrane protein 1-like [Musa acuminata subsp. malaccensis]
Novel03765	0	110.609	#NAME?	7.0421e-06	0.0018566	-//-
Novel04027	472.132	4.60879	6.6787	1.4226e-11	2.3185e-08	--	PREDICTED: catalase isozyme A-like isoform X2 [Musa acuminata subsp. malaccensis]
Novel04052	704.934	0	Inf	1.519e-06	0.00052879	--	Uncharacterized protein TCM_033752 [Theobroma cacao]>gi|508722459|gb|EOY14356.1| Uncharacterized protein TCM_033752 [Theobroma cacao]
Novel04092	1292.89	154.049	3.0691	0.00015489	0.022303	--	Retrotransposon protein, putative [Theobroma cacao]>gi|508711181|gb|EOY03078.1| Retrotransposon protein, putative [Theobroma cacao]
Novel04386	834.477	29.7413	4.8103	4.6253e-07	0.00018427	--	PREDICTED: putative disease resistance protein RGA4 [Musa acuminata subsp. malaccensis]
Novel04399	3.59954	147.326	-5.3551	6.8961e-05	0.011775	--	PREDICTED: uncharacterized protein LOC103868259 [Brassica rapa]
Novel04436	0.474013	109.402	-7.8505	3.595e-05	0.0069728	--	PREDICTED: cytochrome b5-like isoform X1 [Phoenix dactylifera]>gi|672157893|ref|XP_008798669.1| PREDICTED: cytochrome b5-like isoform X2 [Phoenix dactylifera]
Novel04558	1.93626	273.552	-7.1424	2.9006e-09	2.4763e-06	--	PREDICTED: 40S ribosomal protein S12-like isoform X1 [Phoenix dactylifera]
Novel04626	89.2224	0	Inf	6.798e-05	0.011663	--	PREDICTED: uncharacterized protein LOC103431265 [Malus domestica]
Novel04676	104.046	0.58145	7.4833	5.9735e-05	0.010522	-//-
Novel05005	0	117.951	#NAME?	4.2028e-06	0.0012153	-//-
Novel05047	622.591	109.189	2.5115	0.0003961	0.048638	-//-
Novel05088	382.497	10.8326	5.142	4.9097e-08	2.7943e-05	--	PREDICTED: transcription factor TGA2-like isoform X2 [Nelumbo nucifera]
Novel05102	0	245.552	#NAME?	1.3544e-10	1.9425e-07	--	PREDICTED: serine/threonine-protein kinase Aurora-1-like [Gossypium raimondii]>gi|728845410|gb|KHG24853.1| Serine/threonine-protein kinase Aurora-1 [Gossypium arboreum]>gi|763787764|gb|KJB54760.1| hypothetical protein B456_009G047900 [Gossypium raimondii]
Novel05164	95.5856	0.58145	7.361	0.00012752	0.019131	-//-
Novel05166	585.692	0.58145	9.9763	2.6971e-17	1.6118e-13	-//-
Novel05219	437.882	24.6153	4.1529	6.245e-07	0.00024078	-//-
Novel05340	0	418.192	#NAME?	1.2419e-07	5.9374e-05	-//-
Novel05376	802.06	2.3258	8.4298	1.7661e-17	1.2665e-13	--	Strong similarity to gi|3600044 T12H20.12 protease homolog from Arabidopsis thaliana BAC gb|AF080119 and is a member of the reverse transcriptase family PF|00078 [Arabidopsis thaliana]
Novel05409	0.51422	172.46	-8.3897	1.7069e-07	7.9484e-05	--	PREDICTED: HVA22-like protein i isoform X2 [Phoenix dactylifera]
Novel05481	1244.59	137.958	3.1734	4.4942e-07	0.00018106	--	Methyltransferase-like protein 13 [Aegilops tauschii]
Novel05503	0	291.053	#NAME?	0.00012695	0.019126	-//-
Novel05504	0	148.515	#NAME?	3.6171e-05	0.0069728	--	polyprotein [Arabidopsis thaliana]
Novel05626	20.3678	307.316	-3.9154	2.1693e-05	0.004772	--	PREDICTED: protein PHR1-LIKE 1 isoform X1 [Elaeis guineensis]>gi|743804213|ref|XP_010927132.1| PREDICTED: protein PHR1-LIKE 1 isoform X1 [Elaeis guineensis]>gi|743804217|ref|XP_010927133.1| PREDICTED: protein PHR1-LIKE 1 isoform X1 [Elaeis guineensis]
PEQU_05572-D2	110.274	0.430736	8.0001	3.5994e-05	0.0069728	sp|Q05349|12KD_FRAAN Auxin-repressed 12.5 kDa protein OS=Fragaria ananassa PE=2 SV=1//3.08897e-29
PEQU_06636-D2	866.391	73.7398	3.5545	4.766e-05	0.0086652	sp|Q54YW1|ELMOA_DICDI ELMO domain-containing protein A OS=Dictyostelium discoideum GN=elmoA PE=1 SV=1//2.82722e-26
PEQU_07911-D2	2552.27	170.243	3.9061	4.0188e-10	5.1464e-07	sp|Q6R0H1|LHY_ARATH Protein LHY OS=Arabidopsis thaliana GN=LHY PE=1 SV=2//1.88688e-18
