# Supplementary material for: Identification and analysis of sucrose synthase gene family associated with polysaccharide biosynthesis in Dendrobium catenatum by transcriptomic analysis
Source: PeerJ. 2022 Apr 5;10:e13222. doi: 10.7717/peerj.13222 (PMC8992646; doi:10.7717/peerj.13222)
Supplement: Table S7 [file peerj-10-13222-s012.xlsx]

## Sheet: Table S7
GO_accession	Description	Term_type	S1 vs S2	S1 vs S3	S1 vs S4	S2 vs S3	S2 vs S4	S3 vs S4	Total
GO:0003674	molecular_function	molecular_function	16	428	292	50	186	167	1139
GO:0008150	biological_process	biological_process	18	356	240	44	151	143	952
GO:0008152	metabolic process	biological_process	10	290	196	34	122	144	796
GO:0005488	binding	molecular_function	8	272	189	25	123	109	726
GO:0003824	catalytic activity	molecular_function	1	287	187	39	112	94	720
GO:0009987	cellular process	biological_process	6	224	160	19	100	102	611
GO:0071704	organic substance metabolic process	biological_process	5	235	144	20	91	88	583
GO:0044238	primary metabolic process	biological_process	5	230	139	20	87	87	568
GO:0044699	single-organism process	biological_process	7	153	138	24	99	83	504
GO:0005575	cellular_component	cellular_component	5	166	121	16	76	76	460
GO:0044237	cellular metabolic process	biological_process	4	165	123	11	78	77	458
GO:0043170	macromolecule metabolic process	biological_process	2	175	111	11	61	75	435
GO:0097159	organic cyclic compound binding	molecular_function	3	137	100	17	66	58	381
GO:1901363	heterocyclic compound binding	molecular_function	3	137	100	17	66	58	381
GO:0044260	cellular macromolecule metabolic process	biological_process	2	140	96	9	56	66	369
GO:0043167	ion binding	molecular_function	6	128	100	16	63	54	367
GO:0044710	single-organism metabolic process	biological_process	5	104	95	21	65	47	337
GO:0044763	single-organism cellular process	biological_process	3	86	86	7	63	62	307
GO:0016787	hydrolase activity	molecular_function	5	134	73	18	33	26	289
GO:0006807	nitrogen compound metabolic process	biological_process	2	88	80	8	52	57	287
GO:0009058	biosynthetic process	biological_process	2	100	76	12	44	50	284
GO:0016740	transferase activity	molecular_function	3	115	70	7	35	40	270
GO:0034641	cellular nitrogen compound metabolic process	biological_process	1	83	77	7	47	55	270
GO:1901576	organic substance biosynthetic process	biological_process	1	93	72	9	42	50	267
GO:0044249	cellular biosynthetic process	biological_process	2	93	70	9	41	50	265
GO:0005515	protein binding	molecular_function	2	121	60	9	37	35	264
GO:1901360	organic cyclic compound metabolic process	biological_process	1	82	76	7	45	51	262
GO:0006725	cellular aromatic compound metabolic process	biological_process	1	79	76	7	45	52	260
GO:0046483	heterocycle metabolic process	biological_process	1	79	73	7	43	51	254
GO:0006139	nucleobase-containing compound metabolic process	biological_process	1	76	69	7	41	49	243
GO:0090304	nucleic acid metabolic process	biological_process	1	71	66	7	39	46	230
GO:0005623	cell	cellular_component	2	87	66	6	34	33	228
GO:0044464	cell part	cellular_component	2	87	66	6	34	33	228
GO:0016020	membrane	cellular_component	3	74	55	7	40	49	228
GO:0065007	biological regulation	biological_process	2	78	53	4	34	46	217
GO:0050789	regulation of biological process	biological_process	2	76	53	4	34	45	214
GO:0009059	macromolecule biosynthetic process	biological_process	1	79	54	6	31	41	212
GO:0019538	protein metabolic process	biological_process	0	101	47	5	25	30	208
GO:0034645	cellular macromolecule biosynthetic process	biological_process	1	78	53	6	29	39	206
GO:0043169	cation binding	molecular_function	5	59	62	9	37	31	203
GO:0046872	metal ion binding	molecular_function	5	59	61	9	37	31	202
GO:0036094	small molecule binding	molecular_function	1	76	49	7	34	27	194
GO:0050794	regulation of cellular process	biological_process	2	63	52	0	34	43	194
GO:0016491	oxidoreductase activity	molecular_function	4	54	56	14	40	25	193
GO:0005622	intracellular	cellular_component	0	69	55	3	33	32	192
GO:0010467	gene expression	biological_process	1	64	50	6	31	38	190
GO:0055114	oxidation-reduction process	biological_process	4	53	53	14	39	23	186
GO:0043168	anion binding	molecular_function	1	70	47	8	33	27	186
GO:0000166	nucleotide binding	molecular_function	1	74	46	7	32	25	185
GO:1901265	nucleoside phosphate binding	molecular_function	1	74	46	7	32	25	185
GO:0044271	cellular nitrogen compound biosynthetic process	biological_process	1	63	46	5	29	38	182
GO:0044424	intracellular part	cellular_component	0	63	50	3	31	29	176
GO:1901362	organic cyclic compound biosynthetic process	biological_process	1	61	44	5	25	35	171
GO:0016070	RNA metabolic process	biological_process	1	55	45	5	29	35	170
GO:0018130	heterocycle biosynthetic process	biological_process	1	57	42	5	24	35	164
GO:0019438	aromatic compound biosynthetic process	biological_process	1	56	42	5	24	35	163
GO:0003676	nucleic acid binding	molecular_function	0	49	47	3	28	28	155
GO:0034654	nucleobase-containing compound biosynthetic process	biological_process	1	53	37	4	22	32	149
GO:0017076	purine nucleotide binding	molecular_function	1	62	34	5	24	19	145
GO:0032553	ribonucleotide binding	molecular_function	1	61	34	5	23	19	143
GO:0097367	carbohydrate derivative binding	molecular_function	1	61	34	5	23	19	143
GO:0019222	regulation of metabolic process	biological_process	1	58	31	4	21	28	143
GO:0030554	adenyl nucleotide binding	molecular_function	0	60	32	4	21	25	142
GO:0032774	RNA biosynthetic process	biological_process	1	50	35	4	22	30	142
GO:0006351	transcription, DNA-templated	biological_process	1	50	34	4	21	28	138
GO:0097659	nucleic acid-templated transcription	biological_process	1	50	34	4	21	28	138
GO:0043226	organelle	cellular_component	0	49	34	2	26	26	137
GO:0043229	intracellular organelle	cellular_component	0	49	34	2	26	26	137
GO:0031323	regulation of cellular metabolic process	biological_process	1	46	30	4	21	28	130
GO:0006355	regulation of transcription, DNA-templated	biological_process	1	43	30	4	20	28	126
