# Supplementary material for: Identification and analysis of sucrose synthase gene family associated with polysaccharide biosynthesis in Dendrobium catenatum by transcriptomic analysis
Source: PeerJ. 2022 Apr 5;10:e13222. doi: 10.7717/peerj.13222 (PMC8992646; doi:10.7717/peerj.13222)
Supplement: Table S8 [file peerj-10-13222-s013.xlsx]

## Sheet: S1 vs S2
##Databases: KEGG PATHWAY
##Statistical test method: hypergeometric test / Fisher's exact test
##FDR correction method: Benjamini and Hochberg
#Term	Database	ID	Input number	Background number	P-Value	Corrected P-Value	Input	KO	Entrez_ID	Ensembl_ID	KO_name	Hyperlink
Mineral absorption	KEGG PATHWAY	ko04978	1	16	0.00818221	0.0686525	Dendrobium_GLEAN_10086266	K12347|	|	|	SLC11A, NRAMP|	http://www.genome.jp/kegg-bin/show_pathway?ko04978/K12347%09red
Cutin, suberine and wax biosynthesis	KEGG PATHWAY	ko00073	1	46	0.0224719	0.0686525	Dendrobium_GLEAN_10094495	K15404|	|	|	K15404, CER1|	http://www.genome.jp/kegg-bin/show_pathway?ko00073/K15404%09red
Gap junction	KEGG PATHWAY	ko04540	1	51	0.024835	0.0686525	Dendrobium_GLEAN_10061242	K07374|	|	|	TUBA|	http://www.genome.jp/kegg-bin/show_pathway?ko04540/K07374%09red
Pathogenic Escherichia coli infection	KEGG PATHWAY	ko05130	1	52	0.025307	0.0686525	Dendrobium_GLEAN_10061242	K07374|	|	|	TUBA|	http://www.genome.jp/kegg-bin/show_pathway?ko05130/K07374%09red
Diterpenoid biosynthesis	KEGG PATHWAY	ko00904	1	59	0.0286052	0.0686525	Dendrobium_GLEAN_10065001	K17982|	|	|	TPS04, GES|	http://www.genome.jp/kegg-bin/show_pathway?ko00904/K17982%09red
Pentose and glucuronate interconversions	KEGG PATHWAY	ko00040	1	125	0.0592033	0.0976905	Dendrobium_GLEAN_10115751	K01051|	|	|	E3.1.1.11|	http://www.genome.jp/kegg-bin/show_pathway?ko00040/K01051%09red
Phagosome	KEGG PATHWAY	ko04145	1	139	0.0655791	0.0976905	Dendrobium_GLEAN_10061242	K07374|	|	|	TUBA|	http://www.genome.jp/kegg-bin/show_pathway?ko04145/K07374%09red
Lysosome	KEGG PATHWAY	ko04142	1	156	0.0732679	0.0976905	Dendrobium_GLEAN_10086266	K12347|	|	|	SLC11A, NRAMP|	http://www.genome.jp/kegg-bin/show_pathway?ko04142/K12347%09red
Phenylalanine metabolism	KEGG PATHWAY	ko00360	1	156	0.0732679	0.0976905	Dendrobium_GLEAN_10062568	K00430|	|	|	E1.11.1.7|	http://www.genome.jp/kegg-bin/show_pathway?ko00360/K00430%09red
Phenylpropanoid biosynthesis	KEGG PATHWAY	ko00940	1	226	0.104321	0.125185	Dendrobium_GLEAN_10062568	K00430|	|	|	E1.11.1.7|	http://www.genome.jp/kegg-bin/show_pathway?ko00940/K00430%09red
Pyrimidine metabolism	KEGG PATHWAY	ko00240	1	272	0.124204	0.135495	Dendrobium_GLEAN_10040217	K01937|	|	|	pyrG, CTPS|	http://www.genome.jp/kegg-bin/show_pathway?ko00240/K01937%09red
Starch and sucrose metabolism	KEGG PATHWAY	ko00500	1	353	0.158236	0.158236	Dendrobium_GLEAN_10115751	K01051|	|	|	E3.1.1.11|	http://www.genome.jp/kegg-bin/show_pathway?ko00500/K01051%09red

## Sheet: S1 vs S3
##Databases: KEGG PATHWAY
##Statistical test method: hypergeometric test / Fisher's exact test
##FDR correction method: Benjamini and Hochberg
#Term	Database	ID	Input number	Background number	P-Value	Corrected P-Value	Input	KO	Entrez_ID	Ensembl_ID	KO_name	Hyperlink
Starch and sucrose metabolism	KEGG PATHWAY	ko00500	18	353	1.70059e-08	1.7176e-06	Dendrobium_GLEAN_10116701|Dendrobium_GLEAN_10060618|Dendrobium_GLEAN_10049468|Dendrobium_GLEAN_10005633|Dendrobium_GLEAN_10115751|Dendrobium_GLEAN_10097028|Dendrobium_GLEAN_10028427|Dendrobium_GLEAN_10079435|Dendrobium_GLEAN_10109276|Dendrobium_GLEAN_10133317|Dendrobium_GLEAN_10060902|Dendrobium_GLEAN_10056764|Dendrobium_GLEAN_10032668|Dendrobium_GLEAN_10040599|Dendrobium_GLEAN_10110605|Dendrobiu…	K05349|K01187|K01051|K00012|K01051|K05349|K01193|K01051|K08679|K00695|K05349|K01087|K00695|K01188|K01087|K00695|K01051|K08679|	| | | | | | | | | | | | | | | | | |	||||||||||||||||||	bglX|malZ|E3.1.1.11|UGDH, ugd|E3.1.1.11|bglX|E3.2.1.26, sacA|E3.1.1.11|E5.1.3.6|E2.4.1.13|bglX|otsB|E2.4.1.13|E3.2.1.21|otsB|E2.4.1.13|E3.1.1.11|E5.1.3.6|	http://www.genome.jp/kegg-bin/show_pathway?ko00500/K01193%09red/K01187%09red/K08679%09red/K01051%09red/K01188%09red/K05349%09red/K00695%09red/K00012%09red/K01087%09red
Phenylpropanoid biosynthesis	KEGG PATHWAY	ko00940	11	226	1.6593e-05	0.000837949	Dendrobium_GLEAN_10116701|Dendrobium_GLEAN_10062568|Dendrobium_GLEAN_10033115|Dendrobium_GLEAN_10097028|Dendrobium_GLEAN_10084012|Dendrobium_GLEAN_10087558|Dendrobium_GLEAN_10088713|Dendrobium_GLEAN_10021675|Dendrobium_GLEAN_10059360|Dendrobium_GLEAN_10060902|Dendrobium_GLEAN_10040599	K05349|K00430|K01904|K05349|K00430|K00430|K00430|K00430|K00430|K05349|K01188|	| | | | | | | | | | |	|||||||||||	bglX|E1.11.1.7|4CL|bglX|E1.11.1.7|E1.11.1.7|E1.11.1.7|E1.11.1.7|E1.11.1.7|bglX|E3.2.1.21|	http://www.genome.jp/kegg-bin/show_pathway?ko00940/K01188%09red/K05349%09red/K00430%09red/K01904%09red
Pentose and glucuronate interconversions	KEGG PATHWAY	ko00040	7	125	0.000260726	0.00877779	Dendrobium_GLEAN_10049468|Dendrobium_GLEAN_10005633|Dendrobium_GLEAN_10115751|Dendrobium_GLEAN_10079435|Dendrobium_GLEAN_10075996|Dendrobium_GLEAN_10021100|Dendrobium_GLEAN_10114908	K01051|K00012|K01051|K01051|K01728|K01728|K01051|	| | | | | | |	|||||||	E3.1.1.11|UGDH, ugd|E3.1.1.11|E3.1.1.11|pel|pel|E3.1.1.11|	http://www.genome.jp/kegg-bin/show_pathway?ko00040/K01051%09red/K01728%09red/K00012%09red
Systemic lupus erythematosus	KEGG PATHWAY	ko05322	5	71	0.000760476	0.0155149	Dendrobium_GLEAN_10136152|Dendrobium_GLEAN_10085106|Dendrobium_GLEAN_10096367|Dendrobium_GLEAN_10056260|Dendrobium_GLEAN_10041296	K11254|K11252|K11253|K11253|K11251|	| | | | |	|||||	H4|H2B|H3|H3|H2A|	http://www.genome.jp/kegg-bin/show_pathway?ko05322/K11254%09red/K11251%09red/K11252%09red/K11253%09red
Chemical carcinogenesis	KEGG PATHWAY	ko05204	5	72	0.000807129	0.0155149	Dendrobium_GLEAN_10033303|Dendrobium_GLEAN_10050212|Dendrobium_GLEAN_10122788|Dendrobium_GLEAN_10054205|Dendrobium_GLEAN_10087938	K00799|K00799|K00799|K00799|K00799|	| | | | |	|||||	GST, gst|GST, gst|GST, gst|GST, gst|GST, gst|	http://www.genome.jp/kegg-bin/show_pathway?ko05204/K00799%09red
Phenylalanine metabolism	KEGG PATHWAY	ko00360	7	156	0.00092168	0.0155149	Dendrobium_GLEAN_10062568|Dendrobium_GLEAN_10033115|Dendrobium_GLEAN_10084012|Dendrobium_GLEAN_10087558|Dendrobium_GLEAN_10088713|Dendrobium_GLEAN_10021675|Dendrobium_GLEAN_10059360	K00430|K01904|K00430|K00430|K00430|K00430|K00430|	| | | | | | |	|||||||	E1.11.1.7|4CL|E1.11.1.7|E1.11.1.7|E1.11.1.7|E1.11.1.7|E1.11.1.7|	http://www.genome.jp/kegg-bin/show_pathway?ko00360/K00430%09red/K01904%09red
Metabolism of xenobiotics by cytochrome P450	KEGG PATHWAY	ko00980	5	78	0.00113326	0.0158553	Dendrobium_GLEAN_10033303|Dendrobium_GLEAN_10050212|Dendrobium_GLEAN_10122788|Dendrobium_GLEAN_10054205|Dendrobium_GLEAN_10087938	K00799|K00799|K00799|K00799|K00799|	| | | | |	|||||	GST, gst|GST, gst|GST, gst|GST, gst|GST, gst|	http://www.genome.jp/kegg-bin/show_pathway?ko00980/K00799%09red
Cutin, suberine and wax biosynthesis	KEGG PATHWAY	ko00073	4	46	0.00125587	0.0158553	Dendrobium_GLEAN_10130253|Dendrobium_GLEAN_10104418|Dendrobium_GLEAN_10017815|Dendrobium_GLEAN_10136980	K15402|K15400|K15398|K13356|	| | | |	||||	CYP86B1|HHT1|CYP86A4S|FAR|	http://www.genome.jp/kegg-bin/show_pathway?ko00073/K15398%09red/K13356%09red/K15400%09red/K15402%09red
Gap junction	KEGG PATHWAY	ko04540	4	51	0.00179292	0.0193592	Dendrobium_GLEAN_10117360|Dendrobium_GLEAN_10117358|Dendrobium_GLEAN_10025350|Dendrobium_GLEAN_10124101	K07375|K07375|K07375|K07375|	| | | |	||||	TUBB|TUBB|TUBB|TUBB|	http://www.genome.jp/kegg-bin/show_pathway?ko04540/K07375%09red
Pathogenic Escherichia coli infection	KEGG PATHWAY	ko05130	4	52	0.00191675	0.0193592	Dendrobium_GLEAN_10117360|Dendrobium_GLEAN_10117358|Dendrobium_GLEAN_10025350|Dendrobium_GLEAN_10124101	K07375|K07375|K07375|K07375|	| | | |	||||	TUBB|TUBB|TUBB|TUBB|	http://www.genome.jp/kegg-bin/show_pathway?ko05130/K07375%09red
Drug metabolism - cytochrome P450	KEGG PATHWAY	ko00982	5	100	0.0031907	0.0292964	Dendrobium_GLEAN_10033303|Dendrobium_GLEAN_10050212|Dendrobium_GLEAN_10122788|Dendrobium_GLEAN_10054205|Dendrobium_GLEAN_10087938	K00799|K00799|K00799|K00799|K00799|	| | | | |	|||||	GST, gst|GST, gst|GST, gst|GST, gst|GST, gst|	http://www.genome.jp/kegg-bin/show_pathway?ko00982/K00799%09red
Glutathione metabolism	KEGG PATHWAY	ko00480	6	153	0.00403492	0.0339605	Dendrobium_GLEAN_10054205|Dendrobium_GLEAN_10033303|Dendrobium_GLEAN_10087938|Dendrobium_GLEAN_10122788|Dendrobium_GLEAN_10050212|Dendrobium_GLEAN_10010677	K00799|K00799|K00799|K00799|K00799|K10808|	| | | | | |	||||||	GST, gst|GST, gst|GST, gst|GST, gst|GST, gst|RRM2|	http://www.genome.jp/kegg-bin/show_pathway?ko00480/K00799%09red/K10808%09red
Cyanoamino acid metabolism	KEGG PATHWAY	ko00460	4	77	0.00723562	0.0562152	Dendrobium_GLEAN_10097028|Dendrobium_GLEAN_10116701|Dendrobium_GLEAN_10040599|Dendrobium_GLEAN_10060902	K05349|K05349|K01188|K05349|	| | | |	||||	bglX|bglX|E3.2.1.21|bglX|	http://www.genome.jp/kegg-bin/show_pathway?ko00460/K01188%09red/K05349%09red
Alcoholism	KEGG PATHWAY	ko05034	5	131	0.00941929	0.0679535	Dendrobium_GLEAN_10136152|Dendrobium_GLEAN_10085106|Dendrobium_GLEAN_10096367|Dendrobium_GLEAN_10056260|Dendrobium_GLEAN_10041296	K11254|K11252|K11253|K11253|K11251|	| | | | |	|||||	H4|H2B|H3|H3|H2A|	http://www.genome.jp/kegg-bin/show_pathway?ko05034/K11254%09red/K11251%09red/K11252%09red/K11253%09red
Fatty acid elongation	KEGG PATHWAY	ko00062	3	45	0.0104341	0.0702564	Dendrobium_GLEAN_10026932|Dendrobium_GLEAN_10130643|Dendrobium_GLEAN_10034775	K15397|K15397|K15397|	| | |	|||	KCS|KCS|KCS|	http://www.genome.jp/kegg-bin/show_pathway?ko00062/K15397%09red
Phagosome	KEGG PATHWAY	ko04145	5	139	0.0118559	0.0748404	Dendrobium_GLEAN_10034650|Dendrobium_GLEAN_10117358|Dendrobium_GLEAN_10117360|Dendrobium_GLEAN_10025350|Dendrobium_GLEAN_10124101	K08057|K07375|K07375|K07375|K07375|	| | | | |	|||||	CALR|TUBB|TUBB|TUBB|TUBB|	http://www.genome.jp/kegg-bin/show_pathway?ko04145/K08057%09red/K07375%09red
Bile secretion	KEGG PATHWAY	ko04976	3	55	0.0173841	0.103282	Dendrobium_GLEAN_10038800|Dendrobium_GLEAN_10016474|Dendrobium_GLEAN_10038798	K05658|K05658|K05658|	| | |	|||	ABCB1|ABCB1|ABCB1|	http://www.genome.jp/kegg-bin/show_pathway?ko04976/K05658%09red
Diterpenoid biosynthesis	KEGG PATHWAY	ko00904	3	59	0.0207347	0.116344	Dendrobium_GLEAN_10038618|Dendrobium_GLEAN_10038620|Dendrobium_GLEAN_10065001	K17982|K17982|K17982|	| | |	|||	TPS04, GES|TPS04, GES|TPS04, GES|	http://www.genome.jp/kegg-bin/show_pathway?ko00904/K17982%09red
ABC transporters	KEGG PATHWAY	ko02010	3	74	0.036225	0.192565	Dendrobium_GLEAN_10038800|Dendrobium_GLEAN_10016474|Dendrobium_GLEAN_10038798	K05658|K05658|K05658|	| | |	|||	ABCB1|ABCB1|ABCB1|	http://www.genome.jp/kegg-bin/show_pathway?ko02010/K05658%09red
MicroRNAs in cancer	KEGG PATHWAY	ko05206	4	131	0.0390212	0.197057	Dendrobium_GLEAN_10038800|Dendrobium_GLEAN_10061980|Dendrobium_GLEAN_10016474|Dendrobium_GLEAN_10038798	K05658|K00558|K05658|K05658|	| | | |	||||	ABCB1|DNMT1, dcm|ABCB1|ABCB1|	http://www.genome.jp/kegg-bin/show_pathway?ko05206/K05658%09red/K00558%09red
Linoleic acid metabolism	KEGG PATHWAY	ko00591	2	36	0.0497069	0.23814	Dendrobium_GLEAN_10105031|Dendrobium_GLEAN_10018852	K15718|K00454|	| |	||	LOX1_5|LOX2S|	http://www.genome.jp/kegg-bin/show_pathway?ko00591/K00454%09red/K15718%09red
Adipocytokine signaling pathway	KEGG PATHWAY	ko04920	3	86	0.0518722	0.23814	Dendrobium_GLEAN_10033373|Dendrobium_GLEAN_10125209|Dendrobium_GLEAN_10040302	K07198|K01897|K07297|	| | |	|||	PRKAA, AMPK|ACSL, fadD|ADIPOR|	http://www.genome.jp/kegg-bin/show_pathway?ko04920/K07297%09red/K01897%09red/K07198%09red
Isoquinoline alkaloid biosynthesis	KEGG PATHWAY	ko00950	2	42	0.0645016	0.264082	Dendrobium_GLEAN_10097553|Dendrobium_GLEAN_10136748	K00422|K01592|	| |	||	E1.10.3.1|E4.1.1.25|	http://www.genome.jp/kegg-bin/show_pathway?ko00950/K00422%09red/K01592%09red
Lysosome	KEGG PATHWAY	ko04142	4	156	0.0649381	0.264082	Dendrobium_GLEAN_10010784|Dendrobium_GLEAN_10068978|Dendrobium_GLEAN_10070138|Dendrobium_GLEAN_10086266	K01366|K01369|K12382|K12347|	| | | |	||||	CTSH|LGMN|PSAP, SGP1|SLC11A, NRAMP|	http://www.genome.jp/kegg-bin/show_pathway?ko04142/K12347%09red/K12382%09red/K01366%09red/K01369%09red
Circadian rhythm - plant	KEGG PATHWAY	ko04712	3	95	0.065408	0.264082	Dendrobium_GLEAN_10054542|Dendrobium_GLEAN_10031549|Dendrobium_GLEAN_10102858	K12130|K12116|K16223|	| | |	|||	PRR5|FKF1|FT|	http://www.genome.jp/kegg-bin/show_pathway?ko04712/K12116%09red/K16223%09red/K12130%09red
Amino sugar and nucleotide sugar metabolism	KEGG PATHWAY	ko00520	5	226	0.0679816	0.264082	Dendrobium_GLEAN_10125412|Dendrobium_GLEAN_10109276|Dendrobium_GLEAN_10005633|Dendrobium_GLEAN_10007715|Dendrobium_GLEAN_10031397	K12448|K08679|K00012|K01183|K08679|	| | | | |	|||||	UXE, uxe|E5.1.3.6|UGDH, ugd|E3.2.1.14|E5.1.3.6|	http://www.genome.jp/kegg-bin/show_pathway?ko00520/K12448%09red/K08679%09red/K01183%09red/K00012%09red
Other glycan degradation	KEGG PATHWAY	ko00511	2	59	0.112678	0.403071	Dendrobium_GLEAN_10054902|Novel05381	K15923|K15923|	| |	||	AXY8, FUC95A, afcA|AXY8, FUC95A, afcA|	http://www.genome.jp/kegg-bin/show_pathway?ko00511/K15923%09red
Glycerolipid metabolism	KEGG PATHWAY	ko00561	3	122	0.114241	0.403071	Dendrobium_GLEAN_10113714|Dendrobium_GLEAN_10058603|Dendrobium_GLEAN_10076113	K00655|K13508|K13508|	| | |	|||	plsC|GPAT|GPAT|	http://www.genome.jp/kegg-bin/show_pathway?ko00561/K13508%09red/K00655%09red
Fat digestion and absorption	KEGG PATHWAY	ko04975	1	12	0.115733	0.403071	Dendrobium_GLEAN_10079875	K14457|	|	|	MOGAT2, MGAT2|	http://www.genome.jp/kegg-bin/show_pathway?ko04975/K14457%09red
Vitamin B6 metabolism	KEGG PATHWAY	ko00750	1	13	0.124062	0.405522	Dendrobium_GLEAN_10084642	K13248|	|	|	PHOSPHO2|	http://www.genome.jp/kegg-bin/show_pathway?ko00750/K13248%09red
Cysteine and methionine metabolism	KEGG PATHWAY	ko00270	3	127	0.124467	0.405522	Dendrobium_GLEAN_10061980|Dendrobium_GLEAN_10059071|Dendrobium_GLEAN_10059068	K00558|K05933|K05933|	| | |	|||	DNMT1, dcm|E1.14.17.4|E1.14.17.4|	http://www.genome.jp/kegg-bin/show_pathway?ko00270/K05933%09red/K00558%09red
Transcriptional misregulation in cancer	KEGG PATHWAY	ko05202	2	68	0.140966	0.428247	Dendrobium_GLEAN_10096367|Dendrobium_GLEAN_10056260	K11253|K11253|	| |	||	H3|H3|	http://www.genome.jp/kegg-bin/show_pathway?ko05202/K11253%09red
Tyrosine metabolism	KEGG PATHWAY	ko00350	2	69	0.144197	0.428247	Dendrobium_GLEAN_10097553|Dendrobium_GLEAN_10136748	K00422|K01592|	| |	||	E1.10.3.1|E4.1.1.25|	http://www.genome.jp/kegg-bin/show_pathway?ko00350/K00422%09red/K01592%09red
Mineral absorption	KEGG PATHWAY	ko04978	1	16	0.148584	0.428247	Dendrobium_GLEAN_10086266	K12347|	|	|	SLC11A, NRAMP|	http://www.genome.jp/kegg-bin/show_pathway?ko04978/K12347%09red
p53 signaling pathway	KEGG PATHWAY	ko04115	2	71	0.150706	0.428247	Dendrobium_GLEAN_10058105|Dendrobium_GLEAN_10010677	K05868|K10808|	| |	||	CCNB|RRM2|	http://www.genome.jp/kegg-bin/show_pathway?ko04115/K05868%09red/K10808%09red
Plant-pathogen interaction	KEGG PATHWAY	ko04626	5	294	0.152643	0.428247	Dendrobium_GLEAN_10143474|Dendrobium_GLEAN_10113507|Dendrobium_GLEAN_10113497|Dendrobium_GLEAN_10057390|Dendrobium_GLEAN_10057311	K13447|K13448|K13448|K13457|K13448|	| | | | |	|||||	RBOH|CML|CML|RPM1, RPS3|CML|	http://www.genome.jp/kegg-bin/show_pathway?ko04626/K13447%09red/K13457%09red/K13448%09red
Antigen processing and presentation	KEGG PATHWAY	ko04612	2	81	0.184026	0.50234	Dendrobium_GLEAN_10068978|Dendrobium_GLEAN_10034650	K01369|K08057|	| |	||	LGMN|CALR|	http://www.genome.jp/kegg-bin/show_pathway?ko04612/K08057%09red/K01369%09red
Polycyclic aromatic hydrocarbon degradation	KEGG PATHWAY	ko00624	1	22	0.195595	0.506542	Dendrobium_GLEAN_10135306	K00517|	|	|	E1.14.-.-|	http://www.genome.jp/kegg-bin/show_pathway?ko00624/K00517%09red
Bisphenol degradation	KEGG PATHWAY	ko00363	1	22	0.195595	0.506542	Dendrobium_GLEAN_10135306	K00517|	|	|	E1.14.-.-|	http://www.genome.jp/kegg-bin/show_pathway?ko00363/K00517%09red
Plant hormone signal transduction	KEGG PATHWAY	ko04075	5	327	0.204498	0.516358	Dendrobium_GLEAN_10111854|Dendrobium_GLEAN_10000655|Dendrobium_GLEAN_10093944|Dendrobium_GLEAN_10074005|Dendrobium_GLEAN_10074006	K14484|K14488|K14497|K14508|K14508|	| | | | |	|||||	IAA|SAUR|PP2C|NPR1|NPR1|	http://www.genome.jp/kegg-bin/show_pathway?ko04075/K14484%09red/K14497%09red/K14488%09red/K14508%09red
Glycerophospholipid metabolism	KEGG PATHWAY	ko00564	3	169	0.220812	0.537077	Dendrobium_GLEAN_10113714|Dendrobium_GLEAN_10058603|Dendrobium_GLEAN_10076113	K00655|K13508|K13508|	| | |	|||	plsC|GPAT|GPAT|	http://www.genome.jp/kegg-bin/show_pathway?ko00564/K13508%09red/K00655%09red
Zeatin biosynthesis	KEGG PATHWAY	ko00908	1	26	0.225491	0.537077	Dendrobium_GLEAN_10133340	K00279|	|	|	CKX|	http://www.genome.jp/kegg-bin/show_pathway?ko00908/K00279%09red
Galactose metabolism	KEGG PATHWAY	ko00052	2	94	0.228657	0.537077	Dendrobium_GLEAN_10060618|Dendrobium_GLEAN_10028427	K01187|K01193|	| |	||	malZ|E3.2.1.26, sacA|	http://www.genome.jp/kegg-bin/show_pathway?ko00052/K01193%09red/K01187%09red
Sesquiterpenoid and triterpenoid biosynthesis	KEGG PATHWAY	ko00909	1	30	0.25428	0.583688	Dendrobium_GLEAN_10129149	K15803|	|	|	GERD|	http://www.genome.jp/kegg-bin/show_pathway?ko00909/K15803%09red
Fructose and mannose metabolism	KEGG PATHWAY	ko00051	2	105	0.266949	0.599153	Dendrobium_GLEAN_10140901|Dendrobium_GLEAN_10040670	K00895|K00895|	| |	||	E2.7.1.90, pfk|E2.7.1.90, pfk|	http://www.genome.jp/kegg-bin/show_pathway?ko00051/K00895%09red
Limonene and pinene degradation	KEGG PATHWAY	ko00903	1	34	0.282003	0.619181	Dendrobium_GLEAN_10135306	K00517|	|	|	E1.14.-.-|	http://www.genome.jp/kegg-bin/show_pathway?ko00903/K00517%09red
Chagas disease (American trypanosomiasis)	KEGG PATHWAY	ko05142	2	116	0.305237	0.655934	Dendrobium_GLEAN_10034650|Dendrobium_GLEAN_10023953	K08057|K04730|	| |	||	CALR|IRAK1|	http://www.genome.jp/kegg-bin/show_pathway?ko05142/K04730%09red/K08057%09red
Aminobenzoate degradation	KEGG PATHWAY	ko00627	1	42	0.334409	0.681652	Dendrobium_GLEAN_10135306	K00517|	|	|	E1.14.-.-|	http://www.genome.jp/kegg-bin/show_pathway?ko00627/K00517%09red
Glycine, serine and threonine metabolism	KEGG PATHWAY	ko00260	2	126	0.339724	0.681652	Dendrobium_GLEAN_10035158|Dendrobium_GLEAN_10035159	K00108|K00108|	| |	||	betA, CHDH|betA, CHDH|	http://www.genome.jp/kegg-bin/show_pathway?ko00260/K00108%09red
Pancreatic secretion	KEGG PATHWAY	ko04972	1	44	0.346903	0.681652	Dendrobium_GLEAN_10035677	K07904|	|	|	RAB11A|	http://www.genome.jp/kegg-bin/show_pathway?ko04972/K07904%09red
Hypertrophic cardiomyopathy (HCM)	KEGG PATHWAY	ko05410	1	45	0.353063	0.681652	Dendrobium_GLEAN_10033373	K07198|	|	|	PRKAA, AMPK|	http://www.genome.jp/kegg-bin/show_pathway?ko05410/K07198%09red
FoxO signaling pathway	KEGG PATHWAY	ko04068	2	130	0.35338	0.681652	Dendrobium_GLEAN_10033373|Dendrobium_GLEAN_10058105	K07198|K05868|	| |	||	PRKAA, AMPK|CCNB|	http://www.genome.jp/kegg-bin/show_pathway?ko04068/K07198%09red/K05868%09red
Glycosaminoglycan degradation	KEGG PATHWAY	ko00531	1	46	0.359165	0.681652	Dendrobium_GLEAN_10059031	K07964|	|	|	HPSE|	http://www.genome.jp/kegg-bin/show_pathway?ko00531/K07964%09red
Endocrine and other factor-regulated calcium reabsorption	KEGG PATHWAY	ko04961	1	47	0.365209	0.681652	Dendrobium_GLEAN_10035677	K07904|	|	|	RAB11A|	http://www.genome.jp/kegg-bin/show_pathway?ko04961/K07904%09red
Stilbenoid, diarylheptanoid and gingerol biosynthesis	KEGG PATHWAY	ko00945	1	48	0.371197	0.681652	Dendrobium_GLEAN_10135306	K00517|	|	|	E1.14.-.-|	http://www.genome.jp/kegg-bin/show_pathway?ko00945/K00517%09red
Hepatitis B	KEGG PATHWAY	ko05161	1	54	0.40596	0.719332	Dendrobium_GLEAN_10078066	K04802|	|	|	PCNA|	http://www.genome.jp/kegg-bin/show_pathway?ko05161/K04802%09red
Vasopressin-regulated water reabsorption	KEGG PATHWAY	ko04962	1	54	0.40596	0.719332	Dendrobium_GLEAN_10035677	K07904|	|	|	RAB11A|	http://www.genome.jp/kegg-bin/show_pathway?ko04962/K07904%09red
Tryptophan metabolism	KEGG PATHWAY	ko00380	1	57	0.422617	0.735936	Dendrobium_GLEAN_10012601	K11816|	|	|	YUCCA|	http://www.genome.jp/kegg-bin/show_pathway?ko00380/K11816%09red
Various types of N-glycan biosynthesis	KEGG PATHWAY	ko00513	1	59	0.433462	0.742028	Dendrobium_GLEAN_10027426	K14413|	|	|	GALT1|	http://www.genome.jp/kegg-bin/show_pathway?ko00513/K14413%09red
Peroxisome	KEGG PATHWAY	ko04146	2	163	0.46133	0.752848	Dendrobium_GLEAN_10125209|Dendrobium_GLEAN_10136980	K01897|K13356|	| |	||	ACSL, fadD|FAR|	http://www.genome.jp/kegg-bin/show_pathway?ko04146/K01897%09red/K13356%09red
Non-alcoholic fatty liver disease (NAFLD)	KEGG PATHWAY	ko04932	2	165	0.467544	0.752848	Dendrobium_GLEAN_10033373|Dendrobium_GLEAN_10040302	K07198|K07297|	| |	||	PRKAA, AMPK|ADIPOR|	http://www.genome.jp/kegg-bin/show_pathway?ko04932/K07297%09red/K07198%09red
Ubiquinone and other terpenoid-quinone biosynthesis	KEGG PATHWAY	ko00130	1	66	0.469848	0.752848	Dendrobium_GLEAN_10033115	K01904|	|	|	4CL|	http://www.genome.jp/kegg-bin/show_pathway?ko00130/K01904%09red
Phenylalanine, tyrosine and tryptophan biosynthesis	KEGG PATHWAY	ko00400	1	68	0.47981	0.752848	Dendrobium_GLEAN_10094362	K01626|	|	|	E2.5.1.54, aroF, aroG, aroH|	http://www.genome.jp/kegg-bin/show_pathway?ko00400/K01626%09red
HTLV-I infection	KEGG PATHWAY	ko05166	2	169	0.479842	0.752848	Dendrobium_GLEAN_10034650|Dendrobium_GLEAN_10078066	K08057|K04802|	| |	||	CALR|PCNA|	http://www.genome.jp/kegg-bin/show_pathway?ko05166/K04802%09red/K08057%09red
Ascorbate and aldarate metabolism	KEGG PATHWAY	ko00053	1	70	0.489585	0.752848	Dendrobium_GLEAN_10005633	K00012|	|	|	UGDH, ugd|	http://www.genome.jp/kegg-bin/show_pathway?ko00053/K00012%09red
PPAR signaling pathway	KEGG PATHWAY	ko03320	1	71	0.494404	0.752848	Dendrobium_GLEAN_10125209	K01897|	|	|	ACSL, fadD|	http://www.genome.jp/kegg-bin/show_pathway?ko03320/K01897%09red
Circadian rhythm	KEGG PATHWAY	ko04710	1	73	0.503907	0.752848	Dendrobium_GLEAN_10033373	K07198|	|	|	PRKAA, AMPK|	http://www.genome.jp/kegg-bin/show_pathway?ko04710/K07198%09red
AMPK signaling pathway	KEGG PATHWAY	ko04152	2	178	0.506868	0.752848	Dendrobium_GLEAN_10033373|Dendrobium_GLEAN_10040302	K07198|K07297|	| |	||	PRKAA, AMPK|ADIPOR|	http://www.genome.jp/kegg-bin/show_pathway?ko04152/K07297%09red/K07198%09red
Fatty acid biosynthesis	KEGG PATHWAY	ko00061	1	80	0.535786	0.766347	Dendrobium_GLEAN_10125209	K01897|	|	|	ACSL, fadD|	http://www.genome.jp/kegg-bin/show_pathway?ko00061/K01897%09red
Base excision repair	KEGG PATHWAY	ko03410	1	81	0.54017	0.766347	Dendrobium_GLEAN_10078066	K04802|	|	|	PCNA|	http://www.genome.jp/kegg-bin/show_pathway?ko03410/K04802%09red
Regulation of autophagy	KEGG PATHWAY	ko04140	1	82	0.544513	0.766347	Dendrobium_GLEAN_10033373	K07198|	|	|	PRKAA, AMPK|	http://www.genome.jp/kegg-bin/show_pathway?ko04140/K07198%09red
Leishmaniasis	KEGG PATHWAY	ko05140	1	85	0.5573	0.766347	Dendrobium_GLEAN_10023953	K04730|	|	|	IRAK1|	http://www.genome.jp/kegg-bin/show_pathway?ko05140/K04730%09red
Progesterone-mediated oocyte maturation	KEGG PATHWAY	ko04914	1	85	0.5573	0.766347	Dendrobium_GLEAN_10058105	K05868|	|	|	CCNB|	http://www.genome.jp/kegg-bin/show_pathway?ko04914/K05868%09red
Mismatch repair	KEGG PATHWAY	ko03430	1	86	0.561482	0.766347	Dendrobium_GLEAN_10078066	K04802|	|	|	PCNA|	http://www.genome.jp/kegg-bin/show_pathway?ko03430/K04802%09red
Proteoglycans in cancer	KEGG PATHWAY	ko05205	1	88	0.569728	0.767234	Dendrobium_GLEAN_10059031	K07964|	|	|	HPSE|	http://www.genome.jp/kegg-bin/show_pathway?ko05205/K07964%09red
alpha-Linolenic acid metabolism	KEGG PATHWAY	ko00592	1	92	0.585761	0.776439	Dendrobium_GLEAN_10018852	K00454|	|	|	LOX2S|	http://www.genome.jp/kegg-bin/show_pathway?ko00592/K00454%09red
mTOR signaling pathway	KEGG PATHWAY	ko04150	1	96	0.601199	0.776439	Dendrobium_GLEAN_10033373	K07198|	|	|	PRKAA, AMPK|	http://www.genome.jp/kegg-bin/show_pathway?ko04150/K07198%09red
Viral carcinogenesis	KEGG PATHWAY	ko05203	2	217	0.612984	0.776439	Dendrobium_GLEAN_10136152|Dendrobium_GLEAN_10085106	K11254|K11252|	| |	||	H4|H2B|	http://www.genome.jp/kegg-bin/show_pathway?ko05203/K11254%09red/K11252%09red
Fatty acid degradation	KEGG PATHWAY	ko00071	1	100	0.616063	0.776439	Dendrobium_GLEAN_10125209	K01897|	|	|	ACSL, fadD|	http://www.genome.jp/kegg-bin/show_pathway?ko00071/K01897%09red
Toll-like receptor signaling pathway	KEGG PATHWAY	ko04620	1	101	0.619692	0.776439	Dendrobium_GLEAN_10023953	K04730|	|	|	IRAK1|	http://www.genome.jp/kegg-bin/show_pathway?ko04620/K04730%09red
Apoptosis	KEGG PATHWAY	ko04210	1	103	0.626849	0.776439	Dendrobium_GLEAN_10023953	K04730|	|	|	IRAK1|	http://www.genome.jp/kegg-bin/show_pathway?ko04210/K04730%09red
NF-kappa B signaling pathway	KEGG PATHWAY	ko04064	1	104	0.630376	0.776439	Dendrobium_GLEAN_10023953	K04730|	|	|	IRAK1|	http://www.genome.jp/kegg-bin/show_pathway?ko04064/K04730%09red
DNA replication	KEGG PATHWAY	ko03030	1	108	0.644158	0.783855	Dendrobium_GLEAN_10078066	K04802|	|	|	PCNA|	http://www.genome.jp/kegg-bin/show_pathway?ko03030/K04802%09red
Cell cycle	KEGG PATHWAY	ko04110	2	236	0.658027	0.791199	Dendrobium_GLEAN_10078066|Dendrobium_GLEAN_10058105	K04802|K05868|	| |	||	PCNA|CCNB|	http://www.genome.jp/kegg-bin/show_pathway?ko04110/K04802%09red/K05868%09red
Pertussis	KEGG PATHWAY	ko05133	1	115	0.667055	0.792619	Dendrobium_GLEAN_10023953	K04730|	|	|	IRAK1|	http://www.genome.jp/kegg-bin/show_pathway?ko05133/K04730%09red
Nucleotide excision repair	KEGG PATHWAY	ko03420	1	120	0.682507	0.801549	Dendrobium_GLEAN_10078066	K04802|	|	|	PCNA|	http://www.genome.jp/kegg-bin/show_pathway?ko03420/K04802%09red
Oxytocin signaling pathway	KEGG PATHWAY	ko04921	1	127	0.702946	0.810017	Dendrobium_GLEAN_10033373	K07198|	|	|	PRKAA, AMPK|	http://www.genome.jp/kegg-bin/show_pathway?ko04921/K07198%09red
Measles	KEGG PATHWAY	ko05162	1	128	0.705757	0.810017	Dendrobium_GLEAN_10023953	K04730|	|	|	IRAK1|	http://www.genome.jp/kegg-bin/show_pathway?ko05162/K04730%09red
Toxoplasmosis	KEGG PATHWAY	ko05145	1	159	0.780912	0.873573	Dendrobium_GLEAN_10023953	K04730|	|	|	IRAK1|	http://www.genome.jp/kegg-bin/show_pathway?ko05145/K04730%09red
Fatty acid metabolism	KEGG PATHWAY	ko01212	1	159	0.780912	0.873573	Dendrobium_GLEAN_10125209	K01897|	|	|	ACSL, fadD|	http://www.genome.jp/kegg-bin/show_pathway?ko01212/K01897%09red
Insulin signaling pathway	KEGG PATHWAY	ko04910	1	162	0.787081	0.873573	Dendrobium_GLEAN_10033373	K07198|	|	|	PRKAA, AMPK|	http://www.genome.jp/kegg-bin/show_pathway?ko04910/K07198%09red
Neurotrophin signaling pathway	KEGG PATHWAY	ko04722	1	175	0.811875	0.891297	Dendrobium_GLEAN_10023953	K04730|	|	|	IRAK1|	http://www.genome.jp/kegg-bin/show_pathway?ko04722/K04730%09red
PI3K-Akt signaling pathway	KEGG PATHWAY	ko04151	1	190	0.836931	0.908925	Dendrobium_GLEAN_10033373	K07198|	|	|	PRKAA, AMPK|	http://www.genome.jp/kegg-bin/show_pathway?ko04151/K07198%09red
Protein processing in endoplasmic reticulum	KEGG PATHWAY	ko04141	2	355	0.851924	0.915365	Dendrobium_GLEAN_10034650|Dendrobium_GLEAN_10102127	K08057|K09517|	| |	||	CALR|DNAJB11|	http://www.genome.jp/kegg-bin/show_pathway?ko04141/K09517%09red/K08057%09red
Ubiquitin mediated proteolysis	KEGG PATHWAY	ko04120	1	227	0.885424	0.927498	Dendrobium_GLEAN_10073961	K06688|	|	|	UBE2C, UBC11|	http://www.genome.jp/kegg-bin/show_pathway?ko04120/K06688%09red
Tuberculosis	KEGG PATHWAY	ko05152	1	227	0.885424	0.927498	Dendrobium_GLEAN_10023953	K04730|	|	|	IRAK1|	http://www.genome.jp/kegg-bin/show_pathway?ko05152/K04730%09red
Endocytosis	KEGG PATHWAY	ko04144	1	232	0.890765	0.927498	Dendrobium_GLEAN_10035677	K07904|	|	|	RAB11A|	http://www.genome.jp/kegg-bin/show_pathway?ko04144/K07904%09red
Epstein-Barr virus infection	KEGG PATHWAY	ko05169	1	257	0.913971	0.94195	Dendrobium_GLEAN_10023953	K04730|	|	|	IRAK1|	http://www.genome.jp/kegg-bin/show_pathway?ko05169/K04730%09red
Pyrimidine metabolism	KEGG PATHWAY	ko00240	1	272	0.925465	0.944161	Dendrobium_GLEAN_10010677	K10808|	|	|	RRM2|	http://www.genome.jp/kegg-bin/show_pathway?ko00240/K10808%09red
Biosynthesis of amino acids	KEGG PATHWAY	ko01230	1	392	0.976409	0.978979	Dendrobium_GLEAN_10094362	K01626|	|	|	E2.5.1.54, aroF, aroG, aroH|	http://www.genome.jp/kegg-bin/show_pathway?ko01230/K01626%09red
Purine metabolism	KEGG PATHWAY	ko00230	1	404	0.978979	0.978979	Dendrobium_GLEAN_10010677	K10808|	|	|	RRM2|	http://www.genome.jp/kegg-bin/show_pathway?ko00230/K10808%09red

## Sheet: S1 vs S4
##Databases: KEGG PATHWAY
##Statistical test method: hypergeometric test / Fisher's exact test
##FDR correction method: Benjamini and Hochberg
#Term	Database	ID	Input number	Background number	P-Value	Corrected P-Value	Input	KO	Entrez_ID	Ensembl_ID	KO_name	Hyperlink
Circadian rhythm - plant	KEGG PATHWAY	ko04712	9	95	5.6714e-07	7.48625e-05	Dendrobium_GLEAN_10031549|Dendrobium_GLEAN_10031548|Dendrobium_GLEAN_10096782|Dendrobium_GLEAN_10096781|Dendrobium_GLEAN_10018898|Dendrobium_GLEAN_10069911|Dendrobium_GLEAN_10085593|Dendrobium_GLEAN_10085592|PEQU_07911-D2	K12116|K12116|K12133|K12133|K12133|K00660|K12124|K12124|K12133|	| | | | | | | | |	|||||||||	FKF1|FKF1|LHY|LHY|LHY|CHS|GI|GI|LHY|	http://www.genome.jp/kegg-bin/show_pathway?ko04712/K00660%09red/K12124%09red/K12116%09red/K12133%09red
Photosynthesis - antenna proteins	KEGG PATHWAY	ko00196	3	24	0.001967	0.0779079	Dendrobium_GLEAN_10116811|Dendrobium_GLEAN_10054305|Dendrobium_GLEAN_10089671	K08912|K08912|K08913|	| | |	|||	LHCB1|LHCB1|LHCB2|	http://www.genome.jp/kegg-bin/show_pathway?ko00196/K08913%09red/K08912%09red
Flavonoid biosynthesis	KEGG PATHWAY	ko00941	4	56	0.00236085	0.0779079	Dendrobium_GLEAN_10069911|Dendrobium_GLEAN_10119641|Dendrobium_GLEAN_10026202|Dendrobium_GLEAN_10119643	K00660|K05277|K00487|K05277|	| | | |	||||	CHS|E1.14.11.19|CYP73A|E1.14.11.19|	http://www.genome.jp/kegg-bin/show_pathway?ko00941/K00487%09red/K05277%09red/K00660%09red
Porphyrin and chlorophyll metabolism	KEGG PATHWAY	ko00860	4	56	0.00236085	0.0779079	Dendrobium_GLEAN_10028714|Dendrobium_GLEAN_10131785|Dendrobium_GLEAN_10056197|Dendrobium_GLEAN_10022551	K04035|K13600|K03403|K13071|	| | | |	||||	E1.14.13.81, acsF, chlE|CAO|chlH, bchH|PAO, ACD1|	http://www.genome.jp/kegg-bin/show_pathway?ko00860/K13600%09red/K04035%09red/K13071%09red/K03403%09red
Glycine, serine and threonine metabolism	KEGG PATHWAY	ko00260	5	126	0.00767809	0.168745	Dendrobium_GLEAN_10125062|Dendrobium_GLEAN_10091825|Dendrobium_GLEAN_10035158|Dendrobium_GLEAN_10035159|Dendrobium_GLEAN_10067132	K00276|K00058|K00108|K00108|K00058|	| | | | |	|||||	AOC3, AOC2, tynA|serA, PHGDH|betA, CHDH|betA, CHDH|serA, PHGDH|	http://www.genome.jp/kegg-bin/show_pathway?ko00260/K00276%09red/K00058%09red/K00108%09red
Isoquinoline alkaloid biosynthesis	KEGG PATHWAY	ko00950	3	42	0.00844205	0.168745	Dendrobium_GLEAN_10097549|Dendrobium_GLEAN_10125062|Dendrobium_GLEAN_10097553	K00422|K00276|K00422|	| | |	|||	E1.10.3.1|AOC3, AOC2, tynA|E1.10.3.1|	http://www.genome.jp/kegg-bin/show_pathway?ko00950/K00276%09red/K00422%09red
MicroRNAs in cancer	KEGG PATHWAY	ko05206	5	131	0.00894861	0.168745	Dendrobium_GLEAN_10086878|Dendrobium_GLEAN_10051326|Dendrobium_GLEAN_10016474|Dendrobium_GLEAN_10089060|Dendrobium_GLEAN_10055032	K05658|K13863|K05658|K13863|K05658|	| | | | |	|||||	ABCB1|SLC7A1, ATRC1|ABCB1|SLC7A1, ATRC1|ABCB1|	http://www.genome.jp/kegg-bin/show_pathway?ko05206/K13863%09red/K05658%09red
Taurine and hypotaurine metabolism	KEGG PATHWAY	ko00430	2	18	0.0146422	0.241596	Dendrobium_GLEAN_10045158|Dendrobium_GLEAN_10061822	K18592|K18592|	| |	||	GGT1_5|GGT1_5|	http://www.genome.jp/kegg-bin/show_pathway?ko00430/K18592%09red
Bile secretion	KEGG PATHWAY	ko04976	3	55	0.0168133	0.246595	Dendrobium_GLEAN_10086878|Dendrobium_GLEAN_10016474|Dendrobium_GLEAN_10055032	K05658|K05658|K05658|	| | |	|||	ABCB1|ABCB1|ABCB1|	http://www.genome.jp/kegg-bin/show_pathway?ko04976/K05658%09red
Protein processing in endoplasmic reticulum	KEGG PATHWAY	ko04141	8	355	0.0207517	0.273922	Dendrobium_GLEAN_10102127|Dendrobium_GLEAN_10042129|Dendrobium_GLEAN_10024322|Dendrobium_GLEAN_10115482|Dendrobium_GLEAN_10096238|Dendrobium_GLEAN_10016786|Dendrobium_GLEAN_10087099|Dendrobium_GLEAN_10032180	K09517|K13993|K13993|K06689|K13993|K13993|K13993|K13993|	| | | | | | | |	||||||||	DNAJB11|HSP20|HSP20|UBE2D_E, UBC4, UBC5|HSP20|HSP20|HSP20|HSP20|	http://www.genome.jp/kegg-bin/show_pathway?ko04141/K09517%09red/K06689%09red/K13993%09red
Arachidonic acid metabolism	KEGG PATHWAY	ko00590	2	25	0.025925	0.299975	Dendrobium_GLEAN_10045158|Dendrobium_GLEAN_10061822	K18592|K18592|	| |	||	GGT1_5|GGT1_5|	http://www.genome.jp/kegg-bin/show_pathway?ko00590/K18592%09red
Estrogen signaling pathway	KEGG PATHWAY	ko04915	3	69	0.0295825	0.299975	Dendrobium_GLEAN_10039171|Novel00814|Novel00355	K02183|K09571|K09571|	| | |	|||	CALM|FKBP4_5|FKBP4_5|	http://www.genome.jp/kegg-bin/show_pathway?ko04915/K09571%09red/K02183%09red
Tyrosine metabolism	KEGG PATHWAY	ko00350	3	69	0.0295825	0.299975	Dendrobium_GLEAN_10097549|Dendrobium_GLEAN_10125062|Dendrobium_GLEAN_10097553	K00422|K00276|K00422|	| | |	|||	E1.10.3.1|AOC3, AOC2, tynA|E1.10.3.1|	http://www.genome.jp/kegg-bin/show_pathway?ko00350/K00276%09red/K00422%09red
Brassinosteroid biosynthesis	KEGG PATHWAY	ko00905	2	29	0.0335253	0.299975	Dendrobium_GLEAN_10076582|Dendrobium_GLEAN_10034039	K09589|K15639|	| |	||	CYP90D2, D2|CYP734A1, BAS1|	http://www.genome.jp/kegg-bin/show_pathway?ko00905/K09589%09red/K15639%09red
ABC transporters	KEGG PATHWAY	ko02010	3	74	0.0350915	0.299975	Dendrobium_GLEAN_10086878|Dendrobium_GLEAN_10016474|Dendrobium_GLEAN_10055032	K05658|K05658|K05658|	| | |	|||	ABCB1|ABCB1|ABCB1|	http://www.genome.jp/kegg-bin/show_pathway?ko02010/K05658%09red
Plant hormone signal transduction	KEGG PATHWAY	ko04075	7	327	0.0372497	0.299975	Dendrobium_GLEAN_10038144|Dendrobium_GLEAN_10053517|Dendrobium_GLEAN_10023082|Dendrobium_GLEAN_10074005|Dendrobium_GLEAN_10074006|Novel05088|Dendrobium_GLEAN_10105519	K14486|K14488|K14508|K14508|K14508|K14431|K14432|	| | | | | | |	|||||||	K14486, ARF|SAUR|NPR1|NPR1|NPR1|TGA|ABF|	http://www.genome.jp/kegg-bin/show_pathway?ko04075/K14486%09red/K14488%09red/K14432%09red/K14431%09red/K14508%09red
Cyanoamino acid metabolism	KEGG PATHWAY	ko00460	3	77	0.0386332	0.299975	Dendrobium_GLEAN_10097028|Dendrobium_GLEAN_10045158|Dendrobium_GLEAN_10061822	K05349|K18592|K18592|	| | |	|||	bglX|GGT1_5|GGT1_5|	http://www.genome.jp/kegg-bin/show_pathway?ko00460/K05349%09red/K18592%09red
Plant-pathogen interaction	KEGG PATHWAY	ko04626	6	294	0.0620936	0.439708	Dendrobium_GLEAN_10113497|Dendrobium_GLEAN_10082937|Dendrobium_GLEAN_10115967|Dendrobium_GLEAN_10039171|Dendrobium_GLEAN_10068550|Dendrobium_GLEAN_10057390	K13448|K13412|K13448|K02183|K13412|K13457|	| | | | | |	||||||	CML|CPK|CML|CALM|CPK|RPM1, RPS3|	http://www.genome.jp/kegg-bin/show_pathway?ko04626/K02183%09red/K13457%09red/K13412%09red/K13448%09red
Indole alkaloid biosynthesis	KEGG PATHWAY	ko00901	1	6	0.0632914	0.439708	Dendrobium_GLEAN_10046368	K08233|	|	|	E3.1.1.78|	http://www.genome.jp/kegg-bin/show_pathway?ko00901/K08233%09red
Stilbenoid, diarylheptanoid and gingerol biosynthesis	KEGG PATHWAY	ko00945	2	48	0.0788271	0.520259	Dendrobium_GLEAN_10135306|Dendrobium_GLEAN_10026202	K00517|K00487|	| |	||	E1.14.-.-|CYP73A|	http://www.genome.jp/kegg-bin/show_pathway?ko00945/K00487%09red/K00517%09red
Gap junction	KEGG PATHWAY	ko04540	2	51	0.0871086	0.539549	Dendrobium_GLEAN_10117360|Dendrobium_GLEAN_10117358	K07375|K07375|	| |	||	TUBB|TUBB|	http://www.genome.jp/kegg-bin/show_pathway?ko04540/K07375%09red
Pathogenic Escherichia coli infection	KEGG PATHWAY	ko05130	2	52	0.0899249	0.539549	Dendrobium_GLEAN_10117360|Dendrobium_GLEAN_10117358	K07375|K07375|	| |	||	TUBB|TUBB|	http://www.genome.jp/kegg-bin/show_pathway?ko05130/K07375%09red
Nitrogen metabolism	KEGG PATHWAY	ko00910	2	56	0.101449	0.58223	Dendrobium_GLEAN_10059488|Dendrobium_GLEAN_10091209	K00366|K01673|	| |	||	nirA|cynT, can|	http://www.genome.jp/kegg-bin/show_pathway?ko00910/K00366%09red/K01673%09red
Carbohydrate digestion and absorption	KEGG PATHWAY	ko04973	1	13	0.122593	0.674262	Dendrobium_GLEAN_10026400	K01176|	|	|	E3.2.1.1, amyA, malS|	http://www.genome.jp/kegg-bin/show_pathway?ko04973/K01176%09red
Degradation of aromatic compounds	KEGG PATHWAY	ko01220	1	17	0.154785	0.71666	Dendrobium_GLEAN_10026202	K00487|	|	|	CYP73A|	http://www.genome.jp/kegg-bin/show_pathway?ko01220/K00487%09red
GnRH signaling pathway	KEGG PATHWAY	ko04912	2	74	0.157418	0.71666	Dendrobium_GLEAN_10074308|Dendrobium_GLEAN_10039171	K01115|K02183|	| |	||	PLD1_2|CALM|	http://www.genome.jp/kegg-bin/show_pathway?ko04912/K02183%09red/K01115%09red
Anthocyanin biosynthesis	KEGG PATHWAY	ko00942	1	18	0.162648	0.71666	Dendrobium_GLEAN_10064134	K12930|	|	|	BZ1|	http://www.genome.jp/kegg-bin/show_pathway?ko00942/K12930%09red
Phenylpropanoid biosynthesis	KEGG PATHWAY	ko00940	4	226	0.167054	0.71666	Dendrobium_GLEAN_10097028|Dendrobium_GLEAN_10040766|Dendrobium_GLEAN_10026202|Dendrobium_GLEAN_10090480	K05349|K12355|K00487|K12355|	| | | |	||||	bglX|REF1|CYP73A|REF1|	http://www.genome.jp/kegg-bin/show_pathway?ko00940/K05349%09red/K00487%09red/K12355%09red
Glutathione metabolism	KEGG PATHWAY	ko00480	3	153	0.177678	0.71666	Dendrobium_GLEAN_10113293|Dendrobium_GLEAN_10045158|Dendrobium_GLEAN_10061822	K00799|K18592|K18592|	| | |	|||	GST, gst|GGT1_5|GGT1_5|	http://www.genome.jp/kegg-bin/show_pathway?ko00480/K00799%09red/K18592%09red
Calcium signaling pathway	KEGG PATHWAY	ko04020	2	82	0.183833	0.71666	Dendrobium_GLEAN_10092575|Dendrobium_GLEAN_10039171	K05863|K02183|	| |	||	SLC25A4S, ANT|CALM|	http://www.genome.jp/kegg-bin/show_pathway?ko04020/K05863%09red/K02183%09red
cGMP-PKG signaling pathway	KEGG PATHWAY	ko04022	2	82	0.183833	0.71666	Dendrobium_GLEAN_10092575|Dendrobium_GLEAN_10039171	K05863|K02183|	| |	||	SLC25A4S, ANT|CALM|	http://www.genome.jp/kegg-bin/show_pathway?ko04022/K05863%09red/K02183%09red
Toxoplasmosis	KEGG PATHWAY	ko05145	3	159	0.191645	0.71666	Dendrobium_GLEAN_10023953|Dendrobium_GLEAN_10068550|Dendrobium_GLEAN_10082937	K04730|K13412|K13412|	| | |	|||	IRAK1|CPK|CPK|	http://www.genome.jp/kegg-bin/show_pathway?ko05145/K04730%09red/K13412%09red
Polycyclic aromatic hydrocarbon degradation	KEGG PATHWAY	ko00624	1	22	0.193377	0.71666	Dendrobium_GLEAN_10135306	K00517|	|	|	E1.14.-.-|	http://www.genome.jp/kegg-bin/show_pathway?ko00624/K00517%09red
Bisphenol degradation	KEGG PATHWAY	ko00363	1	22	0.193377	0.71666	Dendrobium_GLEAN_10135306	K00517|	|	|	E1.14.-.-|	http://www.genome.jp/kegg-bin/show_pathway?ko00363/K00517%09red
Adipocytokine signaling pathway	KEGG PATHWAY	ko04920	2	86	0.197271	0.71666	Dendrobium_GLEAN_10125209|Dendrobium_GLEAN_10040302	K01897|K07297|	| |	||	ACSL, fadD|ADIPOR|	http://www.genome.jp/kegg-bin/show_pathway?ko04920/K07297%09red/K01897%09red
Methane metabolism	KEGG PATHWAY	ko00680	2	87	0.20065	0.71666	Dendrobium_GLEAN_10091825|Dendrobium_GLEAN_10067132	K00058|K00058|	| |	||	serA, PHGDH|serA, PHGDH|	http://www.genome.jp/kegg-bin/show_pathway?ko00680/K00058%09red
Phototransduction	KEGG PATHWAY	ko04744	1	23	0.200882	0.71666	Dendrobium_GLEAN_10039171	K02183|	|	|	CALM|	http://www.genome.jp/kegg-bin/show_pathway?ko04744/K02183%09red
Ras signaling pathway	KEGG PATHWAY	ko04014	2	89	0.207427	0.720536	Dendrobium_GLEAN_10074308|Dendrobium_GLEAN_10039171	K01115|K02183|	| |	||	PLD1_2|CALM|	http://www.genome.jp/kegg-bin/show_pathway?ko04014/K02183%09red/K01115%09red
Glycerophospholipid metabolism	KEGG PATHWAY	ko00564	3	169	0.215497	0.729376	Dendrobium_GLEAN_10089012|Dendrobium_GLEAN_10074308|Dendrobium_GLEAN_10088790	K05929|K01115|K05929|	| | |	|||	E2.1.1.103, NMT|PLD1_2|E2.1.1.103, NMT|	http://www.genome.jp/kegg-bin/show_pathway?ko00564/K05929%09red/K01115%09red
Salivary secretion	KEGG PATHWAY	ko04970	1	29	0.244475	0.775419	Dendrobium_GLEAN_10039171	K02183|	|	|	CALM|	http://www.genome.jp/kegg-bin/show_pathway?ko04970/K02183%09red
Sesquiterpenoid and triterpenoid biosynthesis	KEGG PATHWAY	ko00909	1	30	0.251506	0.775419	Dendrobium_GLEAN_10107666	K00511|	|	|	SQLE, ERG1|	http://www.genome.jp/kegg-bin/show_pathway?ko00909/K00511%09red
Olfactory transduction	KEGG PATHWAY	ko04740	1	31	0.258473	0.775419	Dendrobium_GLEAN_10039171	K02183|	|	|	CALM|	http://www.genome.jp/kegg-bin/show_pathway?ko04740/K02183%09red
Phototransduction - fly	KEGG PATHWAY	ko04745	1	31	0.258473	0.775419	Dendrobium_GLEAN_10039171	K02183|	|	|	CALM|	http://www.genome.jp/kegg-bin/show_pathway?ko04745/K02183%09red
Gastric acid secretion	KEGG PATHWAY	ko04971	1	31	0.258473	0.775419	Dendrobium_GLEAN_10039171	K02183|	|	|	CALM|	http://www.genome.jp/kegg-bin/show_pathway?ko04971/K02183%09red
Limonene and pinene degradation	KEGG PATHWAY	ko00903	1	34	0.278987	0.794073	Dendrobium_GLEAN_10135306	K00517|	|	|	E1.14.-.-|	http://www.genome.jp/kegg-bin/show_pathway?ko00903/K00517%09red
Fc gamma R-mediated phagocytosis	KEGG PATHWAY	ko04666	2	110	0.279463	0.794073	Dendrobium_GLEAN_10074308|Dendrobium_GLEAN_10097895	K01115|K00889|	| |	||	PLD1_2|PIP5K|	http://www.genome.jp/kegg-bin/show_pathway?ko04666/K00889%09red/K01115%09red
Phosphatidylinositol signaling system	KEGG PATHWAY	ko04070	2	113	0.289779	0.794073	Dendrobium_GLEAN_10039171|Dendrobium_GLEAN_10097895	K02183|K00889|	| |	||	CALM|PIP5K|	http://www.genome.jp/kegg-bin/show_pathway?ko04070/K00889%09red/K02183%09red
Pertussis	KEGG PATHWAY	ko05133	2	115	0.296647	0.794073	Dendrobium_GLEAN_10023953|Dendrobium_GLEAN_10039171	K04730|K02183|	| |	||	IRAK1|CALM|	http://www.genome.jp/kegg-bin/show_pathway?ko05133/K04730%09red/K02183%09red
cAMP signaling pathway	KEGG PATHWAY	ko04024	2	117	0.303505	0.794073	Dendrobium_GLEAN_10074308|Dendrobium_GLEAN_10039171	K01115|K02183|	| |	||	PLD1_2|CALM|	http://www.genome.jp/kegg-bin/show_pathway?ko04024/K02183%09red/K01115%09red
Inflammatory mediator regulation of TRP channels	KEGG PATHWAY	ko04750	1	40	0.318336	0.794073	Dendrobium_GLEAN_10039171	K02183|	|	|	CALM|	http://www.genome.jp/kegg-bin/show_pathway?ko04750/K02183%09red
Pentose and glucuronate interconversions	KEGG PATHWAY	ko00040	2	125	0.330801	0.794073	Dendrobium_GLEAN_10075996|Dendrobium_GLEAN_10115751	K01728|K01051|	| |	||	pel|E3.1.1.11|	http://www.genome.jp/kegg-bin/show_pathway?ko00040/K01051%09red/K01728%09red
Aminobenzoate degradation	KEGG PATHWAY	ko00627	1	42	0.330971	0.794073	Dendrobium_GLEAN_10135306	K00517|	|	|	E1.14.-.-|	http://www.genome.jp/kegg-bin/show_pathway?ko00627/K00517%09red
Tropane, piperidine and pyridine alkaloid biosynthesis	KEGG PATHWAY	ko00960	1	42	0.330971	0.794073	Dendrobium_GLEAN_10125062	K00276|	|	|	AOC3, AOC2, tynA|	http://www.genome.jp/kegg-bin/show_pathway?ko00960/K00276%09red
Circadian entrainment	KEGG PATHWAY	ko04713	1	43	0.337201	0.794073	Dendrobium_GLEAN_10039171	K02183|	|	|	CALM|	http://www.genome.jp/kegg-bin/show_pathway?ko04713/K02183%09red
Alcoholism	KEGG PATHWAY	ko05034	2	131	0.35108	0.794073	Dendrobium_GLEAN_10039171|Dendrobium_GLEAN_10124156	K02183|K11253|	| |	||	CALM|H3|	http://www.genome.jp/kegg-bin/show_pathway?ko05034/K02183%09red/K11253%09red
Vascular smooth muscle contraction	KEGG PATHWAY	ko04270	1	46	0.355546	0.794073	Dendrobium_GLEAN_10039171	K02183|	|	|	CALM|	http://www.genome.jp/kegg-bin/show_pathway?ko04270/K02183%09red
Cutin, suberine and wax biosynthesis	KEGG PATHWAY	ko00073	1	46	0.355546	0.794073	Dendrobium_GLEAN_10017815	K15398|	|	|	CYP86A4S|	http://www.genome.jp/kegg-bin/show_pathway?ko00073/K15398%09red
Glycosaminoglycan degradation	KEGG PATHWAY	ko00531	1	46	0.355546	0.794073	Dendrobium_GLEAN_10059031	K07964|	|	|	HPSE|	http://www.genome.jp/kegg-bin/show_pathway?ko00531/K07964%09red
Sulfur metabolism	KEGG PATHWAY	ko00920	1	49	0.373386	0.794073	Dendrobium_GLEAN_10027148	K00387|	|	|	SUOX|	http://www.genome.jp/kegg-bin/show_pathway?ko00920/K00387%09red
Cell cycle - Caulobacter	KEGG PATHWAY	ko04112	1	49	0.373386	0.794073	Novel03822	K01358|	|	|	clpP, CLPP|	http://www.genome.jp/kegg-bin/show_pathway?ko04112/K01358%09red
Phagosome	KEGG PATHWAY	ko04145	2	139	0.377781	0.794073	Dendrobium_GLEAN_10117360|Dendrobium_GLEAN_10117358	K07375|K07375|	| |	||	TUBB|TUBB|	http://www.genome.jp/kegg-bin/show_pathway?ko04145/K07375%09red
Steroid biosynthesis	KEGG PATHWAY	ko00100	1	50	0.379223	0.794073	Dendrobium_GLEAN_10107666	K00511|	|	|	SQLE, ERG1|	http://www.genome.jp/kegg-bin/show_pathway?ko00100/K00511%09red
Meiosis - yeast	KEGG PATHWAY	ko04113	2	140	0.381088	0.794073	Novel00624|Novel02888	K02540|K03363|	| |	||	MCM2|CDC20|	http://www.genome.jp/kegg-bin/show_pathway?ko04113/K03363%09red/K02540%09red
Ether lipid metabolism	KEGG PATHWAY	ko00565	1	51	0.385005	0.794073	Dendrobium_GLEAN_10074308	K01115|	|	|	PLD1_2|	http://www.genome.jp/kegg-bin/show_pathway?ko00565/K01115%09red
Rap1 signaling pathway	KEGG PATHWAY	ko04015	1	54	0.402032	0.795923	Dendrobium_GLEAN_10039171	K02183|	|	|	CALM|	http://www.genome.jp/kegg-bin/show_pathway?ko04015/K02183%09red
Amphetamine addiction	KEGG PATHWAY	ko05031	1	58	0.424007	0.795923	Dendrobium_GLEAN_10039171	K02183|	|	|	CALM|	http://www.genome.jp/kegg-bin/show_pathway?ko05031/K02183%09red
GABAergic synapse	KEGG PATHWAY	ko04727	1	58	0.424007	0.795923	Novel02611	K08341|	|	|	GABARAP, ATG8, LC3|	http://www.genome.jp/kegg-bin/show_pathway?ko04727/K08341%09red
Melanogenesis	KEGG PATHWAY	ko04916	1	58	0.424007	0.795923	Dendrobium_GLEAN_10039171	K02183|	|	|	CALM|	http://www.genome.jp/kegg-bin/show_pathway?ko04916/K02183%09red
Glioma	KEGG PATHWAY	ko05214	1	59	0.429374	0.795923	Dendrobium_GLEAN_10039171	K02183|	|	|	CALM|	http://www.genome.jp/kegg-bin/show_pathway?ko05214/K02183%09red
Diterpenoid biosynthesis	KEGG PATHWAY	ko00904	1	59	0.429374	0.795923	Dendrobium_GLEAN_10038620	K17982|	|	|	TPS04, GES|	http://www.genome.jp/kegg-bin/show_pathway?ko00904/K17982%09red
Phenylalanine metabolism	KEGG PATHWAY	ko00360	2	156	0.432892	0.795923	Dendrobium_GLEAN_10125062|Dendrobium_GLEAN_10026202	K00276|K00487|	| |	||	AOC3, AOC2, tynA|CYP73A|	http://www.genome.jp/kegg-bin/show_pathway?ko00360/K00276%09red/K00487%09red
Glutamatergic synapse	KEGG PATHWAY	ko04724	1	64	0.455471	0.795923	Dendrobium_GLEAN_10074308	K01115|	|	|	PLD1_2|	http://www.genome.jp/kegg-bin/show_pathway?ko04724/K01115%09red
Ubiquinone and other terpenoid-quinone biosynthesis	KEGG PATHWAY	ko00130	1	66	0.465574	0.795923	Dendrobium_GLEAN_10026202	K00487|	|	|	CYP73A|	http://www.genome.jp/kegg-bin/show_pathway?ko00130/K00487%09red
HTLV-I infection	KEGG PATHWAY	ko05166	2	169	0.473239	0.795923	Dendrobium_GLEAN_10092575|Novel02888	K05863|K03363|	| |	||	SLC25A4S, ANT|CDC20|	http://www.genome.jp/kegg-bin/show_pathway?ko05166/K03363%09red/K05863%09red
Transcriptional misregulation in cancer	KEGG PATHWAY	ko05202	1	68	0.475491	0.795923	Dendrobium_GLEAN_10124156	K11253|	|	|	H3|	http://www.genome.jp/kegg-bin/show_pathway?ko05202/K11253%09red
Phenylalanine, tyrosine and tryptophan biosynthesis	KEGG PATHWAY	ko00400	1	68	0.475491	0.795923	Dendrobium_GLEAN_10094362	K01626|	|	|	E2.5.1.54, aroF, aroG, aroH|	http://www.genome.jp/kegg-bin/show_pathway?ko00400/K01626%09red
Ascorbate and aldarate metabolism	KEGG PATHWAY	ko00053	1	70	0.485224	0.795923	Dendrobium_GLEAN_10073768	K14190|	|	|	VTC2_5|	http://www.genome.jp/kegg-bin/show_pathway?ko00053/K14190%09red
Systemic lupus erythematosus	KEGG PATHWAY	ko05322	1	71	0.490023	0.795923	Dendrobium_GLEAN_10124156	K11253|	|	|	H3|	http://www.genome.jp/kegg-bin/show_pathway?ko05322/K11253%09red
PPAR signaling pathway	KEGG PATHWAY	ko03320	1	71	0.490023	0.795923	Dendrobium_GLEAN_10125209	K01897|	|	|	ACSL, fadD|	http://www.genome.jp/kegg-bin/show_pathway?ko03320/K01897%09red
Neurotrophin signaling pathway	KEGG PATHWAY	ko04722	2	175	0.491273	0.795923	Dendrobium_GLEAN_10023953|Dendrobium_GLEAN_10039171	K04730|K02183|	| |	||	IRAK1|CALM|	http://www.genome.jp/kegg-bin/show_pathway?ko04722/K04730%09red/K02183%09red
Chemical carcinogenesis	KEGG PATHWAY	ko05204	1	72	0.494777	0.795923	Dendrobium_GLEAN_10113293	K00799|	|	|	GST, gst|	http://www.genome.jp/kegg-bin/show_pathway?ko05204/K00799%09red
Metabolism of xenobiotics by cytochrome P450	KEGG PATHWAY	ko00980	1	78	0.52239	0.795923	Dendrobium_GLEAN_10113293	K00799|	|	|	GST, gst|	http://www.genome.jp/kegg-bin/show_pathway?ko00980/K00799%09red
Long-term potentiation	KEGG PATHWAY	ko04720	1	79	0.526844	0.795923	Dendrobium_GLEAN_10039171	K02183|	|	|	CALM|	http://www.genome.jp/kegg-bin/show_pathway?ko04720/K02183%09red
Fatty acid biosynthesis	KEGG PATHWAY	ko00061	1	80	0.531256	0.795923	Dendrobium_GLEAN_10125209	K01897|	|	|	ACSL, fadD|	http://www.genome.jp/kegg-bin/show_pathway?ko00061/K01897%09red
Cell cycle - yeast	KEGG PATHWAY	ko04111	2	189	0.53181	0.795923	Novel00624|Novel02888	K02540|K03363|	| |	||	MCM2|CDC20|	http://www.genome.jp/kegg-bin/show_pathway?ko04111/K03363%09red/K02540%09red
Base excision repair	KEGG PATHWAY	ko03410	1	81	0.535628	0.795923	Dendrobium_GLEAN_10074935	K03575|	|	|	mutY|	http://www.genome.jp/kegg-bin/show_pathway?ko03410/K03575%09red
Sphingolipid metabolism	KEGG PATHWAY	ko00600	1	82	0.539959	0.795923	Dendrobium_GLEAN_10058951	K04712|	|	|	DEGS|	http://www.genome.jp/kegg-bin/show_pathway?ko00600/K04712%09red
Regulation of autophagy	KEGG PATHWAY	ko04140	1	82	0.539959	0.795923	Novel02611	K08341|	|	|	GABARAP, ATG8, LC3|	http://www.genome.jp/kegg-bin/show_pathway?ko04140/K08341%09red
Legionellosis	KEGG PATHWAY	ko05134	1	83	0.544249	0.795923	Dendrobium_GLEAN_10047312	K03231|	|	|	EEF1A|	http://www.genome.jp/kegg-bin/show_pathway?ko05134/K03231%09red
Leishmaniasis	KEGG PATHWAY	ko05140	1	85	0.552712	0.795923	Dendrobium_GLEAN_10023953	K04730|	|	|	IRAK1|	http://www.genome.jp/kegg-bin/show_pathway?ko05140/K04730%09red
Oocyte meiosis	KEGG PATHWAY	ko04114	2	198	0.556688	0.795923	Dendrobium_GLEAN_10039171|Novel02888	K02183|K03363|	| |	||	CALM|CDC20|	http://www.genome.jp/kegg-bin/show_pathway?ko04114/K03363%09red/K02183%09red
Proteoglycans in cancer	KEGG PATHWAY	ko05205	1	88	0.565112	0.795923	Dendrobium_GLEAN_10059031	K07964|	|	|	HPSE|	http://www.genome.jp/kegg-bin/show_pathway?ko05205/K07964%09red
Dopaminergic synapse	KEGG PATHWAY	ko04728	1	91	0.577171	0.795923	Dendrobium_GLEAN_10039171	K02183|	|	|	CALM|	http://www.genome.jp/kegg-bin/show_pathway?ko04728/K02183%09red
Adrenergic signaling in cardiomyocytes	KEGG PATHWAY	ko04261	1	91	0.577171	0.795923	Dendrobium_GLEAN_10039171	K02183|	|	|	CALM|	http://www.genome.jp/kegg-bin/show_pathway?ko04261/K02183%09red
Fatty acid degradation	KEGG PATHWAY	ko00071	1	100	0.611385	0.795923	Dendrobium_GLEAN_10125209	K01897|	|	|	ACSL, fadD|	http://www.genome.jp/kegg-bin/show_pathway?ko00071/K01897%09red
Drug metabolism - cytochrome P450	KEGG PATHWAY	ko00982	1	100	0.611385	0.795923	Dendrobium_GLEAN_10113293	K00799|	|	|	GST, gst|	http://www.genome.jp/kegg-bin/show_pathway?ko00982/K00799%09red
Toll-like receptor signaling pathway	KEGG PATHWAY	ko04620	1	101	0.615012	0.795923	Dendrobium_GLEAN_10023953	K04730|	|	|	IRAK1|	http://www.genome.jp/kegg-bin/show_pathway?ko04620/K04730%09red
Inositol phosphate metabolism	KEGG PATHWAY	ko00562	1	101	0.615012	0.795923	Dendrobium_GLEAN_10097895	K00889|	|	|	PIP5K|	http://www.genome.jp/kegg-bin/show_pathway?ko00562/K00889%09red
Apoptosis	KEGG PATHWAY	ko04210	1	103	0.622165	0.795923	Dendrobium_GLEAN_10023953	K04730|	|	|	IRAK1|	http://www.genome.jp/kegg-bin/show_pathway?ko04210/K04730%09red
NF-kappa B signaling pathway	KEGG PATHWAY	ko04064	1	104	0.625692	0.795923	Dendrobium_GLEAN_10023953	K04730|	|	|	IRAK1|	http://www.genome.jp/kegg-bin/show_pathway?ko04064/K04730%09red
Fructose and mannose metabolism	KEGG PATHWAY	ko00051	1	105	0.629186	0.795923	Dendrobium_GLEAN_10140901	K00895|	|	|	E2.7.1.90, pfk|	http://www.genome.jp/kegg-bin/show_pathway?ko00051/K00895%09red
Ubiquitin mediated proteolysis	KEGG PATHWAY	ko04120	2	227	0.630363	0.795923	Dendrobium_GLEAN_10115482|Novel02888	K06689|K03363|	| |	||	UBE2D_E, UBC4, UBC5|CDC20|	http://www.genome.jp/kegg-bin/show_pathway?ko04120/K03363%09red/K06689%09red
Tuberculosis	KEGG PATHWAY	ko05152	2	227	0.630363	0.795923	Dendrobium_GLEAN_10023953|Dendrobium_GLEAN_10039171	K04730|K02183|	| |	||	IRAK1|CALM|	http://www.genome.jp/kegg-bin/show_pathway?ko05152/K04730%09red/K02183%09red
beta-Alanine metabolism	KEGG PATHWAY	ko00410	1	108	0.639475	0.795923	Dendrobium_GLEAN_10125062	K00276|	|	|	AOC3, AOC2, tynA|	http://www.genome.jp/kegg-bin/show_pathway?ko00410/K00276%09red
DNA replication	KEGG PATHWAY	ko03030	1	108	0.639475	0.795923	Novel00624	K02540|	|	|	MCM2|	http://www.genome.jp/kegg-bin/show_pathway?ko03030/K02540%09red
Endocytosis	KEGG PATHWAY	ko04144	2	232	0.642062	0.795923	Dendrobium_GLEAN_10074308|Dendrobium_GLEAN_10097895	K01115|K00889|	| |	||	PLD1_2|PIP5K|	http://www.genome.jp/kegg-bin/show_pathway?ko04144/K00889%09red/K01115%09red
Starch and sucrose metabolism	KEGG PATHWAY	ko00500	3	353	0.645533	0.795923	Dendrobium_GLEAN_10097028|Dendrobium_GLEAN_10026400|Dendrobium_GLEAN_10115751	K05349|K01176|K01051|	| | |	|||	bglX|E3.2.1.1, amyA, malS|E3.1.1.11|	http://www.genome.jp/kegg-bin/show_pathway?ko00500/K01051%09red/K05349%09red/K01176%09red
Cell cycle	KEGG PATHWAY	ko04110	2	236	0.65121	0.795923	Novel00624|Novel02888	K02540|K03363|	| |	||	MCM2|CDC20|	http://www.genome.jp/kegg-bin/show_pathway?ko04110/K03363%09red/K02540%09red
Regulation of actin cytoskeleton	KEGG PATHWAY	ko04810	1	115	0.66239	0.798652	Dendrobium_GLEAN_10097895	K00889|	|	|	PIP5K|	http://www.genome.jp/kegg-bin/show_pathway?ko04810/K00889%09red
Chagas disease (American trypanosomiasis)	KEGG PATHWAY	ko05142	1	116	0.665543	0.798652	Dendrobium_GLEAN_10023953	K04730|	|	|	IRAK1|	http://www.genome.jp/kegg-bin/show_pathway?ko05142/K04730%09red
Oxytocin signaling pathway	KEGG PATHWAY	ko04921	1	127	0.698349	0.825556	Dendrobium_GLEAN_10039171	K02183|	|	|	CALM|	http://www.genome.jp/kegg-bin/show_pathway?ko04921/K02183%09red
Measles	KEGG PATHWAY	ko05162	1	128	0.701167	0.825556	Dendrobium_GLEAN_10023953	K04730|	|	|	IRAK1|	http://www.genome.jp/kegg-bin/show_pathway?ko05162/K04730%09red
FoxO signaling pathway	KEGG PATHWAY	ko04068	1	130	0.706726	0.825556	Novel02611	K08341|	|	|	GABARAP, ATG8, LC3|	http://www.genome.jp/kegg-bin/show_pathway?ko04068/K08341%09red
Biosynthesis of amino acids	KEGG PATHWAY	ko01230	3	392	0.71338	0.826019	Dendrobium_GLEAN_10094362|Dendrobium_GLEAN_10091825|Dendrobium_GLEAN_10067132	K01626|K00058|K00058|	| | |	|||	E2.5.1.54, aroF, aroG, aroH|serA, PHGDH|serA, PHGDH|	http://www.genome.jp/kegg-bin/show_pathway?ko01230/K00058%09red/K01626%09red
Lysosome	KEGG PATHWAY	ko04142	1	156	0.770276	0.867035	Dendrobium_GLEAN_10010784	K01366|	|	|	CTSH|	http://www.genome.jp/kegg-bin/show_pathway?ko04142/K01366%09red
Fatty acid metabolism	KEGG PATHWAY	ko01212	1	159	0.776662	0.867035	Dendrobium_GLEAN_10125209	K01897|	|	|	ACSL, fadD|	http://www.genome.jp/kegg-bin/show_pathway?ko01212/K01897%09red
Insulin signaling pathway	KEGG PATHWAY	ko04910	1	162	0.782873	0.867035	Dendrobium_GLEAN_10039171	K02183|	|	|	CALM|	http://www.genome.jp/kegg-bin/show_pathway?ko04910/K02183%09red
Peroxisome	KEGG PATHWAY	ko04146	1	163	0.784904	0.867035	Dendrobium_GLEAN_10125209	K01897|	|	|	ACSL, fadD|	http://www.genome.jp/kegg-bin/show_pathway?ko04146/K01897%09red
Ribosome	KEGG PATHWAY	ko03010	3	444	0.787747	0.867035	Dendrobium_GLEAN_10007231|Dendrobium_GLEAN_10003360|Novel04558	K02901|K02931|K02951|	| | |	|||	RP-L27e, RPL27|RP-L5, MRPL5, rplE|RP-S12e, RPS12|	http://www.genome.jp/kegg-bin/show_pathway?ko03010/K02931%09red/K02901%09red/K02951%09red
Non-alcoholic fatty liver disease (NAFLD)	KEGG PATHWAY	ko04932	1	165	0.788911	0.867035	Dendrobium_GLEAN_10040302	K07297|	|	|	ADIPOR|	http://www.genome.jp/kegg-bin/show_pathway?ko04932/K07297%09red
Ribosome biogenesis in eukaryotes	KEGG PATHWAY	ko03008	1	168	0.794782	0.867035	Novel02563	K12619|	|	|	XRN2, RAT1|	http://www.genome.jp/kegg-bin/show_pathway?ko03008/K12619%09red
Parkinson's disease	KEGG PATHWAY	ko05012	1	176	0.809655	0.872705	Dendrobium_GLEAN_10092575	K05863|	|	|	SLC25A4S, ANT|	http://www.genome.jp/kegg-bin/show_pathway?ko05012/K05863%09red
AMPK signaling pathway	KEGG PATHWAY	ko04152	1	178	0.813202	0.872705	Dendrobium_GLEAN_10040302	K07297|	|	|	ADIPOR|	http://www.genome.jp/kegg-bin/show_pathway?ko04152/K07297%09red
Alzheimer's disease	KEGG PATHWAY	ko05010	1	188	0.829976	0.883522	Dendrobium_GLEAN_10039171	K02183|	|	|	CALM|	http://www.genome.jp/kegg-bin/show_pathway?ko05010/K02183%09red
Viral carcinogenesis	KEGG PATHWAY	ko05203	1	217	0.870604	0.912078	Novel02888	K03363|	|	|	CDC20|	http://www.genome.jp/kegg-bin/show_pathway?ko05203/K03363%09red
Amino sugar and nucleotide sugar metabolism	KEGG PATHWAY	ko00520	1	226	0.881125	0.912078	Dendrobium_GLEAN_10125412	K12448|	|	|	UXE, uxe|	http://www.genome.jp/kegg-bin/show_pathway?ko00520/K12448%09red
Huntington's disease	KEGG PATHWAY	ko05016	1	228	0.883345	0.912078	Dendrobium_GLEAN_10092575	K05863|	|	|	SLC25A4S, ANT|	http://www.genome.jp/kegg-bin/show_pathway?ko05016/K05863%09red
RNA degradation	KEGG PATHWAY	ko03018	1	229	0.884439	0.912078	Novel02563	K12619|	|	|	XRN2, RAT1|	http://www.genome.jp/kegg-bin/show_pathway?ko03018/K12619%09red
Purine metabolism	KEGG PATHWAY	ko00230	2	404	0.893459	0.914237	Novel04626|Dendrobium_GLEAN_10031139	K01514|K02083|	| |	||	PRUNE, PPX1|allC|	http://www.genome.jp/kegg-bin/show_pathway?ko00230/K01514%09red/K02083%09red
Epstein-Barr virus infection	KEGG PATHWAY	ko05169	1	257	0.911259	0.925279	Dendrobium_GLEAN_10023953	K04730|	|	|	IRAK1|	http://www.genome.jp/kegg-bin/show_pathway?ko05169/K04730%09red
Carbon metabolism	KEGG PATHWAY	ko01200	2	441	0.919509	0.926528	Dendrobium_GLEAN_10091825|Dendrobium_GLEAN_10067132	K00058|K00058|	| |	||	serA, PHGDH|serA, PHGDH|	http://www.genome.jp/kegg-bin/show_pathway?ko01200/K00058%09red
RNA transport	KEGG PATHWAY	ko03013	1	328	0.954635	0.954635	Dendrobium_GLEAN_10047312	K03231|	|	|	EEF1A|	http://www.genome.jp/kegg-bin/show_pathway?ko03013/K03231%09red

## Sheet: S2 vs S3
##Databases: KEGG PATHWAY
##Statistical test method: hypergeometric test / Fisher's exact test
##FDR correction method: Benjamini and Hochberg
#Term	Database	ID	Input number	Background number	P-Value	Corrected P-Value	Input	KO	Entrez_ID	Ensembl_ID	KO_name	Hyperlink
Pentose and glucuronate interconversions	KEGG PATHWAY	ko00040	4	125	0.000103526	0.0036234	Dendrobium_GLEAN_10055856|Dendrobium_GLEAN_10095198|Dendrobium_GLEAN_10049468|Dendrobium_GLEAN_10079435	K01728|K01728|K01051|K01051|	| | | |	||||	pel|pel|E3.1.1.11|E3.1.1.11|	http://www.genome.jp/kegg-bin/show_pathway?ko00040/K01051%09red/K01728%09red
Isoquinoline alkaloid biosynthesis	KEGG PATHWAY	ko00950	2	42	0.00314155	0.0312984	Dendrobium_GLEAN_10097549|Dendrobium_GLEAN_10136748	K00422|K01592|	| |	||	E1.10.3.1|E4.1.1.25|	http://www.genome.jp/kegg-bin/show_pathway?ko00950/K00422%09red/K01592%09red
Phenylalanine metabolism	KEGG PATHWAY	ko00360	3	156	0.00337984	0.0312984	Dendrobium_GLEAN_10059360|Dendrobium_GLEAN_10140150|Dendrobium_GLEAN_10033115	K00430|K00430|K01904|	| | |	|||	E1.11.1.7|E1.11.1.7|4CL|	http://www.genome.jp/kegg-bin/show_pathway?ko00360/K00430%09red/K01904%09red
Fatty acid elongation	KEGG PATHWAY	ko00062	2	45	0.00357696	0.0312984	Dendrobium_GLEAN_10130642|Dendrobium_GLEAN_10130643	K15397|K15397|	| |	||	KCS|KCS|	http://www.genome.jp/kegg-bin/show_pathway?ko00062/K15397%09red
Tyrosine metabolism	KEGG PATHWAY	ko00350	2	69	0.00798959	0.0540459	Dendrobium_GLEAN_10097549|Dendrobium_GLEAN_10136748	K00422|K01592|	| |	||	E1.10.3.1|E4.1.1.25|	http://www.genome.jp/kegg-bin/show_pathway?ko00350/K00422%09red/K01592%09red
Phenylpropanoid biosynthesis	KEGG PATHWAY	ko00940	3	226	0.009265	0.0540459	Dendrobium_GLEAN_10059360|Dendrobium_GLEAN_10140150|Dendrobium_GLEAN_10033115	K00430|K00430|K01904|	| | |	|||	E1.11.1.7|E1.11.1.7|4CL|	http://www.genome.jp/kegg-bin/show_pathway?ko00940/K00430%09red/K01904%09red
Fat digestion and absorption	KEGG PATHWAY	ko04975	1	12	0.0242882	0.106819	Dendrobium_GLEAN_10079875	K14457|	|	|	MOGAT2, MGAT2|	http://www.genome.jp/kegg-bin/show_pathway?ko04975/K14457%09red
Glycine, serine and threonine metabolism	KEGG PATHWAY	ko00260	2	126	0.0244157	0.106819	Dendrobium_GLEAN_10035158|Dendrobium_GLEAN_10035159	K00108|K00108|	| |	||	betA, CHDH|betA, CHDH|	http://www.genome.jp/kegg-bin/show_pathway?ko00260/K00108%09red
Bisphenol degradation	KEGG PATHWAY	ko00363	1	22	0.0425776	0.149022	Dendrobium_GLEAN_10135306	K00517|	|	|	E1.14.-.-|	http://www.genome.jp/kegg-bin/show_pathway?ko00363/K00517%09red
Polycyclic aromatic hydrocarbon degradation	KEGG PATHWAY	ko00624	1	22	0.0425776	0.149022	Dendrobium_GLEAN_10135306	K00517|	|	|	E1.14.-.-|	http://www.genome.jp/kegg-bin/show_pathway?ko00624/K00517%09red
Limonene and pinene degradation	KEGG PATHWAY	ko00903	1	34	0.0640824	0.203899	Dendrobium_GLEAN_10135306	K00517|	|	|	E1.14.-.-|	http://www.genome.jp/kegg-bin/show_pathway?ko00903/K00517%09red
Aminobenzoate degradation	KEGG PATHWAY	ko00627	1	42	0.0781555	0.20881	Dendrobium_GLEAN_10135306	K00517|	|	|	E1.14.-.-|	http://www.genome.jp/kegg-bin/show_pathway?ko00627/K00517%09red
Cutin, suberine and wax biosynthesis	KEGG PATHWAY	ko00073	1	46	0.0851142	0.20881	Dendrobium_GLEAN_10017815	K15398|	|	|	CYP86A4S|	http://www.genome.jp/kegg-bin/show_pathway?ko00073/K15398%09red
Stilbenoid, diarylheptanoid and gingerol biosynthesis	KEGG PATHWAY	ko00945	1	48	0.0885743	0.20881	Dendrobium_GLEAN_10135306	K00517|	|	|	E1.14.-.-|	http://www.genome.jp/kegg-bin/show_pathway?ko00945/K00517%09red
Gap junction	KEGG PATHWAY	ko04540	1	51	0.0937403	0.20881	Dendrobium_GLEAN_10061242	K07374|	|	|	TUBA|	http://www.genome.jp/kegg-bin/show_pathway?ko04540/K07374%09red
Pathogenic Escherichia coli infection	KEGG PATHWAY	ko05130	1	52	0.095456	0.20881	Dendrobium_GLEAN_10061242	K07374|	|	|	TUBA|	http://www.genome.jp/kegg-bin/show_pathway?ko05130/K07374%09red
Ubiquinone and other terpenoid-quinone biosynthesis	KEGG PATHWAY	ko00130	1	66	0.119144	0.245296	Dendrobium_GLEAN_10033115	K01904|	|	|	4CL|	http://www.genome.jp/kegg-bin/show_pathway?ko00130/K01904%09red
Chemical carcinogenesis	KEGG PATHWAY	ko05204	1	72	0.129109	0.250538	Dendrobium_GLEAN_10132549	K00799|	|	|	GST, gst|	http://www.genome.jp/kegg-bin/show_pathway?ko05204/K00799%09red
Metabolism of xenobiotics by cytochrome P450	KEGG PATHWAY	ko00980	1	78	0.138963	0.250538	Dendrobium_GLEAN_10132549	K00799|	|	|	GST, gst|	http://www.genome.jp/kegg-bin/show_pathway?ko00980/K00799%09red
Starch and sucrose metabolism	KEGG PATHWAY	ko00500	2	353	0.144733	0.250538	Dendrobium_GLEAN_10079435|Dendrobium_GLEAN_10049468	K01051|K01051|	| |	||	E3.1.1.11|E3.1.1.11|	http://www.genome.jp/kegg-bin/show_pathway?ko00500/K01051%09red
Leishmaniasis	KEGG PATHWAY	ko05140	1	85	0.150323	0.250538	Dendrobium_GLEAN_10023953	K04730|	|	|	IRAK1|	http://www.genome.jp/kegg-bin/show_pathway?ko05140/K04730%09red
Drug metabolism - cytochrome P450	KEGG PATHWAY	ko00982	1	100	0.174172	0.252589	Dendrobium_GLEAN_10132549	K00799|	|	|	GST, gst|	http://www.genome.jp/kegg-bin/show_pathway?ko00982/K00799%09red
Toll-like receptor signaling pathway	KEGG PATHWAY	ko04620	1	101	0.175739	0.252589	Dendrobium_GLEAN_10023953	K04730|	|	|	IRAK1|	http://www.genome.jp/kegg-bin/show_pathway?ko04620/K04730%09red
Apoptosis	KEGG PATHWAY	ko04210	1	103	0.178863	0.252589	Dendrobium_GLEAN_10023953	K04730|	|	|	IRAK1|	http://www.genome.jp/kegg-bin/show_pathway?ko04210/K04730%09red
NF-kappa B signaling pathway	KEGG PATHWAY	ko04064	1	104	0.180421	0.252589	Dendrobium_GLEAN_10023953	K04730|	|	|	IRAK1|	http://www.genome.jp/kegg-bin/show_pathway?ko04064/K04730%09red
Pertussis	KEGG PATHWAY	ko05133	1	115	0.197366	0.25782	Dendrobium_GLEAN_10023953	K04730|	|	|	IRAK1|	http://www.genome.jp/kegg-bin/show_pathway?ko05133/K04730%09red
Chagas disease (American trypanosomiasis)	KEGG PATHWAY	ko05142	1	116	0.19889	0.25782	Dendrobium_GLEAN_10023953	K04730|	|	|	IRAK1|	http://www.genome.jp/kegg-bin/show_pathway?ko05142/K04730%09red
Measles	KEGG PATHWAY	ko05162	1	128	0.216951	0.271189	Dendrobium_GLEAN_10023953	K04730|	|	|	IRAK1|	http://www.genome.jp/kegg-bin/show_pathway?ko05162/K04730%09red
Phagosome	KEGG PATHWAY	ko04145	1	139	0.233157	0.281396	Dendrobium_GLEAN_10061242	K07374|	|	|	TUBA|	http://www.genome.jp/kegg-bin/show_pathway?ko04145/K07374%09red
Glutathione metabolism	KEGG PATHWAY	ko00480	1	153	0.253309	0.295527	Dendrobium_GLEAN_10132549	K00799|	|	|	GST, gst|	http://www.genome.jp/kegg-bin/show_pathway?ko00480/K00799%09red
Toxoplasmosis	KEGG PATHWAY	ko05145	1	159	0.261785	0.295564	Dendrobium_GLEAN_10023953	K04730|	|	|	IRAK1|	http://www.genome.jp/kegg-bin/show_pathway?ko05145/K04730%09red
Neurotrophin signaling pathway	KEGG PATHWAY	ko04722	1	175	0.283932	0.310551	Dendrobium_GLEAN_10023953	K04730|	|	|	IRAK1|	http://www.genome.jp/kegg-bin/show_pathway?ko04722/K04730%09red
Tuberculosis	KEGG PATHWAY	ko05152	1	227	0.351513	0.372817	Dendrobium_GLEAN_10023953	K04730|	|	|	IRAK1|	http://www.genome.jp/kegg-bin/show_pathway?ko05152/K04730%09red
Epstein-Barr virus infection	KEGG PATHWAY	ko05169	1	257	0.387618	0.392281	Dendrobium_GLEAN_10023953	K04730|	|	|	IRAK1|	http://www.genome.jp/kegg-bin/show_pathway?ko05169/K04730%09red
Oxidative phosphorylation	KEGG PATHWAY	ko00190	1	261	0.392281	0.392281	Dendrobium_GLEAN_10041168	K05573|	|	|	ndhB|	http://www.genome.jp/kegg-bin/show_pathway?ko00190/K05573%09red

## Sheet: S2 vs S4
##Databases: KEGG PATHWAY
##Statistical test method: hypergeometric test / Fisher's exact test
##FDR correction method: Benjamini and Hochberg
#Term	Database	ID	Input number	Background number	P-Value	Corrected P-Value	Input	KO	Entrez_ID	Ensembl_ID	KO_name	Hyperlink
Circadian rhythm - plant	KEGG PATHWAY	ko04712	6	95	1.37563e-05	0.00100421	Dendrobium_GLEAN_10096782|Dendrobium_GLEAN_10085819|Dendrobium_GLEAN_10096781|Dendrobium_GLEAN_10018898|Dendrobium_GLEAN_10069911|PEQU_07911-D2	K12133|K12119|K12133|K12133|K00660|K12133|	| | | | | |	||||||	LHY|CRY2|LHY|LHY|CHS|LHY|	http://www.genome.jp/kegg-bin/show_pathway?ko04712/K12119%09red/K00660%09red/K12133%09red
Tyrosine metabolism	KEGG PATHWAY	ko00350	5	69	3.97882e-05	0.00145227	Dendrobium_GLEAN_10046548|Dendrobium_GLEAN_10097549|Dendrobium_GLEAN_10125062|Dendrobium_GLEAN_10077622|Dendrobium_GLEAN_10097553	K01592|K00422|K00276|K00001|K00422|	| | | | |	|||||	E4.1.1.25|E1.10.3.1|AOC3, AOC2, tynA|E1.1.1.1, adh|E1.10.3.1|	http://www.genome.jp/kegg-bin/show_pathway?ko00350/K00276%09red/K00422%09red/K01592%09red/K00001%09red
Isoquinoline alkaloid biosynthesis	KEGG PATHWAY	ko00950	4	42	9.11281e-05	0.00221745	Dendrobium_GLEAN_10046548|Dendrobium_GLEAN_10097549|Dendrobium_GLEAN_10125062|Dendrobium_GLEAN_10097553	K01592|K00422|K00276|K00422|	| | | |	||||	E4.1.1.25|E1.10.3.1|AOC3, AOC2, tynA|E1.10.3.1|	http://www.genome.jp/kegg-bin/show_pathway?ko00950/K00276%09red/K00422%09red/K01592%09red
Photosynthesis - antenna proteins	KEGG PATHWAY	ko00196	3	24	0.000352128	0.00642634	Dendrobium_GLEAN_10033033|Dendrobium_GLEAN_10054305|Dendrobium_GLEAN_10089671	K08912|K08912|K08913|	| | |	|||	LHCB1|LHCB1|LHCB2|	http://www.genome.jp/kegg-bin/show_pathway?ko00196/K08913%09red/K08912%09red
Glycine, serine and threonine metabolism	KEGG PATHWAY	ko00260	5	126	0.000582542	0.00850512	Dendrobium_GLEAN_10125062|Dendrobium_GLEAN_10091825|Dendrobium_GLEAN_10035158|Dendrobium_GLEAN_10035159|Dendrobium_GLEAN_10067132	K00276|K00058|K00108|K00108|K00058|	| | | | |	|||||	AOC3, AOC2, tynA|serA, PHGDH|betA, CHDH|betA, CHDH|serA, PHGDH|	http://www.genome.jp/kegg-bin/show_pathway?ko00260/K00276%09red/K00058%09red/K00108%09red
Porphyrin and chlorophyll metabolism	KEGG PATHWAY	ko00860	3	56	0.00347328	0.0422582	Dendrobium_GLEAN_10056197|Dendrobium_GLEAN_10131785|Dendrobium_GLEAN_10028714	K03403|K13600|K04035|	| | |	|||	chlH, bchH|CAO|E1.14.13.81, acsF, chlE|	http://www.genome.jp/kegg-bin/show_pathway?ko00860/K13600%09red/K03403%09red/K04035%09red
Taurine and hypotaurine metabolism	KEGG PATHWAY	ko00430	2	18	0.00466691	0.0486692	Dendrobium_GLEAN_10045158|Dendrobium_GLEAN_10061822	K18592|K18592|	| |	||	GGT1_5|GGT1_5|	http://www.genome.jp/kegg-bin/show_pathway?ko00430/K18592%09red
Cyanoamino acid metabolism	KEGG PATHWAY	ko00460	3	77	0.00812062	0.0683124	Dendrobium_GLEAN_10045158|Dendrobium_GLEAN_10096249|Dendrobium_GLEAN_10061822	K18592|K01188|K18592|	| | |	|||	GGT1_5|E3.2.1.21|GGT1_5|	http://www.genome.jp/kegg-bin/show_pathway?ko00460/K01188%09red/K18592%09red
Arachidonic acid metabolism	KEGG PATHWAY	ko00590	2	25	0.00842207	0.0683124	Dendrobium_GLEAN_10045158|Dendrobium_GLEAN_10061822	K18592|K18592|	| |	||	GGT1_5|GGT1_5|	http://www.genome.jp/kegg-bin/show_pathway?ko00590/K18592%09red
Protein processing in endoplasmic reticulum	KEGG PATHWAY	ko04141	6	355	0.0109094	0.0730634	Dendrobium_GLEAN_10042129|Dendrobium_GLEAN_10024322|Dendrobium_GLEAN_10019288|Dendrobium_GLEAN_10016786|Dendrobium_GLEAN_10087099|Dendrobium_GLEAN_10032180	K13993|K13993|K13993|K13993|K13993|K13993|	| | | | | |	||||||	HSP20|HSP20|HSP20|HSP20|HSP20|HSP20|	http://www.genome.jp/kegg-bin/show_pathway?ko04141/K13993%09red
Brassinosteroid biosynthesis	KEGG PATHWAY	ko00905	2	29	0.0110096	0.0730634	Dendrobium_GLEAN_10035488|Dendrobium_GLEAN_10034039	K12640|K15639|	| |	||	CYP85A2, BR6OX2|CYP734A1, BAS1|	http://www.genome.jp/kegg-bin/show_pathway?ko00905/K12640%09red/K15639%09red
Cutin, suberine and wax biosynthesis	KEGG PATHWAY	ko00073	2	46	0.0252408	0.153548	Dendrobium_GLEAN_10094495|Dendrobium_GLEAN_10017815	K15404|K15398|	| |	||	K15404, CER1|CYP86A4S|	http://www.genome.jp/kegg-bin/show_pathway?ko00073/K15398%09red/K15404%09red
Diterpenoid biosynthesis	KEGG PATHWAY	ko00904	2	59	0.0392291	0.220286	Dendrobium_GLEAN_10065002|Dendrobium_GLEAN_10065001	K04121|K17982|	| |	||	E4.2.3.19|TPS04, GES|	http://www.genome.jp/kegg-bin/show_pathway?ko00904/K17982%09red/K04121%09red
Glutathione metabolism	KEGG PATHWAY	ko00480	3	153	0.0464376	0.235191	Dendrobium_GLEAN_10045158|Dendrobium_GLEAN_10040660|Dendrobium_GLEAN_10061822	K18592|K00799|K18592|	| | |	|||	GGT1_5|GST, gst|GGT1_5|	http://www.genome.jp/kegg-bin/show_pathway?ko00480/K00799%09red/K18592%09red
Toxoplasmosis	KEGG PATHWAY	ko05145	3	159	0.0509227	0.235191	Dendrobium_GLEAN_10023953|Dendrobium_GLEAN_10068550|Dendrobium_GLEAN_10082937	K04730|K13412|K13412|	| | |	|||	IRAK1|CPK|CPK|	http://www.genome.jp/kegg-bin/show_pathway?ko05145/K04730%09red/K13412%09red
Estrogen signaling pathway	KEGG PATHWAY	ko04915	2	69	0.0515486	0.235191	Novel00814|Novel00355	K09571|K09571|	| |	||	FKBP4_5|FKBP4_5|	http://www.genome.jp/kegg-bin/show_pathway?ko04915/K09571%09red
Monoterpenoid biosynthesis	KEGG PATHWAY	ko00902	1	11	0.0598449	0.256981	Dendrobium_GLEAN_10093519	K07385|	|	|	TPS-Cin|	http://www.genome.jp/kegg-bin/show_pathway?ko00902/K07385%09red
Metabolism of xenobiotics by cytochrome P450	KEGG PATHWAY	ko00980	2	78	0.0636487	0.258131	Dendrobium_GLEAN_10040660|Dendrobium_GLEAN_10077622	K00799|K00001|	| |	||	GST, gst|E1.1.1.1, adh|	http://www.genome.jp/kegg-bin/show_pathway?ko00980/K00799%09red/K00001%09red
Naphthalene degradation	KEGG PATHWAY	ko00626	1	13	0.0694676	0.266902	Dendrobium_GLEAN_10077622	K00001|	|	|	E1.1.1.1, adh|	http://www.genome.jp/kegg-bin/show_pathway?ko00626/K00001%09red
Methane metabolism	KEGG PATHWAY	ko00680	2	87	0.0765962	0.279576	Dendrobium_GLEAN_10091825|Dendrobium_GLEAN_10067132	K00058|K00058|	| |	||	serA, PHGDH|serA, PHGDH|	http://www.genome.jp/kegg-bin/show_pathway?ko00680/K00058%09red
Degradation of aromatic compounds	KEGG PATHWAY	ko01220	1	17	0.0884208	0.301955	Dendrobium_GLEAN_10077622	K00001|	|	|	E1.1.1.1, adh|	http://www.genome.jp/kegg-bin/show_pathway?ko01220/K00001%09red
Plant hormone signal transduction	KEGG PATHWAY	ko04075	4	327	0.0910002	0.301955	Dendrobium_GLEAN_10038144|Novel05088|Dendrobium_GLEAN_10084734|Dendrobium_GLEAN_10105519	K14486|K14431|K14500|K14432|	| | | |	||||	K14486, ARF|TGA|BSK|ABF|	http://www.genome.jp/kegg-bin/show_pathway?ko04075/K14486%09red/K14432%09red/K14431%09red/K14500%09red
Drug metabolism - cytochrome P450	KEGG PATHWAY	ko00982	2	100	0.0965927	0.306577	Dendrobium_GLEAN_10040660|Dendrobium_GLEAN_10077622	K00799|K00001|	| |	||	GST, gst|E1.1.1.1, adh|	http://www.genome.jp/kegg-bin/show_pathway?ko00982/K00799%09red/K00001%09red
Bisphenol degradation	KEGG PATHWAY	ko00363	1	22	0.111574	0.307487	Dendrobium_GLEAN_10135306	K00517|	|	|	E1.14.-.-|	http://www.genome.jp/kegg-bin/show_pathway?ko00363/K00517%09red
Polycyclic aromatic hydrocarbon degradation	KEGG PATHWAY	ko00624	1	22	0.111574	0.307487	Dendrobium_GLEAN_10135306	K00517|	|	|	E1.14.-.-|	http://www.genome.jp/kegg-bin/show_pathway?ko00624/K00517%09red
Starch and sucrose metabolism	KEGG PATHWAY	ko00500	4	353	0.111817	0.307487	Dendrobium_GLEAN_10125615|Dendrobium_GLEAN_10122541|Dendrobium_GLEAN_10096249|Dendrobium_GLEAN_10122543	K01193|K01179|K01188|K01179|	| | | |	||||	E3.2.1.26, sacA|E3.2.1.4|E3.2.1.21|E3.2.1.4|	http://www.genome.jp/kegg-bin/show_pathway?ko00500/K01179%09red/K01188%09red/K01193%09red
Phenylpropanoid biosynthesis	KEGG PATHWAY	ko00940	3	226	0.113728	0.307487	Dendrobium_GLEAN_10140150|Dendrobium_GLEAN_10096249|Dendrobium_GLEAN_10090480	K00430|K01188|K12355|	| | |	|||	E1.11.1.7|E3.2.1.21|REF1|	http://www.genome.jp/kegg-bin/show_pathway?ko00940/K01188%09red/K00430%09red/K12355%09red
Chloroalkane and chloroalkene degradation	KEGG PATHWAY	ko00625	1	25	0.125186	0.315122	Dendrobium_GLEAN_10077622	K00001|	|	|	E1.1.1.1, adh|	http://www.genome.jp/kegg-bin/show_pathway?ko00625/K00001%09red
Retinol metabolism	KEGG PATHWAY	ko00830	1	25	0.125186	0.315122	Dendrobium_GLEAN_10077622	K00001|	|	|	E1.1.1.1, adh|	http://www.genome.jp/kegg-bin/show_pathway?ko00830/K00001%09red
Sesquiterpenoid and triterpenoid biosynthesis	KEGG PATHWAY	ko00909	1	30	0.147413	0.358704	Dendrobium_GLEAN_10107666	K00511|	|	|	SQLE, ERG1|	http://www.genome.jp/kegg-bin/show_pathway?ko00909/K00511%09red
Limonene and pinene degradation	KEGG PATHWAY	ko00903	1	34	0.16479	0.388054	Dendrobium_GLEAN_10135306	K00517|	|	|	E1.14.-.-|	http://www.genome.jp/kegg-bin/show_pathway?ko00903/K00517%09red
Phenylalanine metabolism	KEGG PATHWAY	ko00360	2	156	0.194497	0.414009	Dendrobium_GLEAN_10125062|Dendrobium_GLEAN_10140150	K00276|K00430|	| |	||	AOC3, AOC2, tynA|E1.11.1.7|	http://www.genome.jp/kegg-bin/show_pathway?ko00360/K00276%09red/K00430%09red
Plant-pathogen interaction	KEGG PATHWAY	ko04626	3	294	0.19592	0.414009	Dendrobium_GLEAN_10059650|Dendrobium_GLEAN_10068550|Dendrobium_GLEAN_10082937	K05391|K13412|K13412|	| | |	|||	CNGF|CPK|CPK|	http://www.genome.jp/kegg-bin/show_pathway?ko04626/K05391%09red/K13412%09red
Aminobenzoate degradation	KEGG PATHWAY	ko00627	1	42	0.198497	0.414009	Dendrobium_GLEAN_10135306	K00517|	|	|	E1.14.-.-|	http://www.genome.jp/kegg-bin/show_pathway?ko00627/K00517%09red
Tropane, piperidine and pyridine alkaloid biosynthesis	KEGG PATHWAY	ko00960	1	42	0.198497	0.414009	Dendrobium_GLEAN_10125062	K00276|	|	|	AOC3, AOC2, tynA|	http://www.genome.jp/kegg-bin/show_pathway?ko00960/K00276%09red
HTLV-I infection	KEGG PATHWAY	ko05166	2	169	0.218806	0.439753	Dendrobium_GLEAN_10092575|Novel02888	K05863|K03363|	| |	||	SLC25A4S, ANT|CDC20|	http://www.genome.jp/kegg-bin/show_pathway?ko05166/K03363%09red/K05863%09red
Stilbenoid, diarylheptanoid and gingerol biosynthesis	KEGG PATHWAY	ko00945	1	48	0.222889	0.439753	Dendrobium_GLEAN_10135306	K00517|	|	|	E1.14.-.-|	http://www.genome.jp/kegg-bin/show_pathway?ko00945/K00517%09red
Steroid biosynthesis	KEGG PATHWAY	ko00100	1	50	0.230854	0.443484	Dendrobium_GLEAN_10107666	K00511|	|	|	SQLE, ERG1|	http://www.genome.jp/kegg-bin/show_pathway?ko00100/K00511%09red
Nitrogen metabolism	KEGG PATHWAY	ko00910	1	56	0.254269	0.46404	Dendrobium_GLEAN_10091209	K01673|	|	|	cynT, can|	http://www.genome.jp/kegg-bin/show_pathway?ko00910/K01673%09red
Flavonoid biosynthesis	KEGG PATHWAY	ko00941	1	56	0.254269	0.46404	Dendrobium_GLEAN_10069911	K00660|	|	|	CHS|	http://www.genome.jp/kegg-bin/show_pathway?ko00941/K00660%09red
Chemical carcinogenesis	KEGG PATHWAY	ko05204	1	72	0.313306	0.557837	Dendrobium_GLEAN_10040660	K00799|	|	|	GST, gst|	http://www.genome.jp/kegg-bin/show_pathway?ko05204/K00799%09red
Base excision repair	KEGG PATHWAY	ko03410	1	81	0.344451	0.577071	Dendrobium_GLEAN_10074935	K03575|	|	|	mutY|	http://www.genome.jp/kegg-bin/show_pathway?ko03410/K03575%09red
Calcium signaling pathway	KEGG PATHWAY	ko04020	1	82	0.347824	0.577071	Dendrobium_GLEAN_10092575	K05863|	|	|	SLC25A4S, ANT|	http://www.genome.jp/kegg-bin/show_pathway?ko04020/K05863%09red
cGMP-PKG signaling pathway	KEGG PATHWAY	ko04022	1	82	0.347824	0.577071	Dendrobium_GLEAN_10092575	K05863|	|	|	SLC25A4S, ANT|	http://www.genome.jp/kegg-bin/show_pathway?ko04022/K05863%09red
Leishmaniasis	KEGG PATHWAY	ko05140	1	85	0.357839	0.580495	Dendrobium_GLEAN_10023953	K04730|	|	|	IRAK1|	http://www.genome.jp/kegg-bin/show_pathway?ko05140/K04730%09red
Galactose metabolism	KEGG PATHWAY	ko00052	1	94	0.38698	0.610019	Dendrobium_GLEAN_10125615	K01193|	|	|	E3.2.1.26, sacA|	http://www.genome.jp/kegg-bin/show_pathway?ko00052/K01193%09red
Fatty acid degradation	KEGG PATHWAY	ko00071	1	100	0.405674	0.610019	Dendrobium_GLEAN_10077622	K00001|	|	|	E1.1.1.1, adh|	http://www.genome.jp/kegg-bin/show_pathway?ko00071/K00001%09red
Toll-like receptor signaling pathway	KEGG PATHWAY	ko04620	1	101	0.408734	0.610019	Dendrobium_GLEAN_10023953	K04730|	|	|	IRAK1|	http://www.genome.jp/kegg-bin/show_pathway?ko04620/K04730%09red
Apoptosis	KEGG PATHWAY	ko04210	1	103	0.414808	0.610019	Dendrobium_GLEAN_10023953	K04730|	|	|	IRAK1|	http://www.genome.jp/kegg-bin/show_pathway?ko04210/K04730%09red
NF-kappa B signaling pathway	KEGG PATHWAY	ko04064	1	104	0.417821	0.610019	Dendrobium_GLEAN_10023953	K04730|	|	|	IRAK1|	http://www.genome.jp/kegg-bin/show_pathway?ko04064/K04730%09red
beta-Alanine metabolism	KEGG PATHWAY	ko00410	1	108	0.429722	0.615093	Dendrobium_GLEAN_10125062	K00276|	|	|	AOC3, AOC2, tynA|	http://www.genome.jp/kegg-bin/show_pathway?ko00410/K00276%09red
Pertussis	KEGG PATHWAY	ko05133	1	115	0.449971	0.623674	Dendrobium_GLEAN_10023953	K04730|	|	|	IRAK1|	http://www.genome.jp/kegg-bin/show_pathway?ko05133/K04730%09red
Chagas disease (American trypanosomiasis)	KEGG PATHWAY	ko05142	1	116	0.452805	0.623674	Dendrobium_GLEAN_10023953	K04730|	|	|	IRAK1|	http://www.genome.jp/kegg-bin/show_pathway?ko05142/K04730%09red
Measles	KEGG PATHWAY	ko05162	1	128	0.485701	0.650248	Dendrobium_GLEAN_10023953	K04730|	|	|	IRAK1|	http://www.genome.jp/kegg-bin/show_pathway?ko05162/K04730%09red
MicroRNAs in cancer	KEGG PATHWAY	ko05206	1	131	0.493614	0.650248	Dendrobium_GLEAN_10051326	K13863|	|	|	SLC7A1, ATRC1|	http://www.genome.jp/kegg-bin/show_pathway?ko05206/K13863%09red
Aminoacyl-tRNA biosynthesis	KEGG PATHWAY	ko00970	1	138	0.511611	0.650248	Dendrobium_GLEAN_10090203	K01883|	|	|	CARS, cysS|	http://www.genome.jp/kegg-bin/show_pathway?ko00970/K01883%09red
Photosynthesis	KEGG PATHWAY	ko00195	1	139	0.514129	0.650248	Dendrobium_GLEAN_10121399	K03542|	|	|	psbS|	http://www.genome.jp/kegg-bin/show_pathway?ko00195/K03542%09red
Meiosis - yeast	KEGG PATHWAY	ko04113	1	140	0.516635	0.650248	Novel02888	K03363|	|	|	CDC20|	http://www.genome.jp/kegg-bin/show_pathway?ko04113/K03363%09red
Neurotrophin signaling pathway	KEGG PATHWAY	ko04722	1	175	0.596703	0.720893	Dendrobium_GLEAN_10023953	K04730|	|	|	IRAK1|	http://www.genome.jp/kegg-bin/show_pathway?ko04722/K04730%09red
Parkinson's disease	KEGG PATHWAY	ko05012	1	176	0.598786	0.720893	Dendrobium_GLEAN_10092575	K05863|	|	|	SLC25A4S, ANT|	http://www.genome.jp/kegg-bin/show_pathway?ko05012/K05863%09red
Biosynthesis of amino acids	KEGG PATHWAY	ko01230	2	392	0.60239	0.720893	Dendrobium_GLEAN_10091825|Dendrobium_GLEAN_10067132	K00058|K00058|	| |	||	serA, PHGDH|serA, PHGDH|	http://www.genome.jp/kegg-bin/show_pathway?ko01230/K00058%09red
Cell cycle - yeast	KEGG PATHWAY	ko04111	1	189	0.624911	0.723307	Novel02888	K03363|	|	|	CDC20|	http://www.genome.jp/kegg-bin/show_pathway?ko04111/K03363%09red
Oocyte meiosis	KEGG PATHWAY	ko04114	1	198	0.642002	0.723307	Novel02888	K03363|	|	|	CDC20|	http://www.genome.jp/kegg-bin/show_pathway?ko04114/K03363%09red
Glycolysis / Gluconeogenesis	KEGG PATHWAY	ko00010	1	201	0.647526	0.723307	Dendrobium_GLEAN_10077622	K00001|	|	|	E1.1.1.1, adh|	http://www.genome.jp/kegg-bin/show_pathway?ko00010/K00001%09red
Carbon metabolism	KEGG PATHWAY	ko01200	2	441	0.666017	0.723307	Dendrobium_GLEAN_10091825|Dendrobium_GLEAN_10067132	K00058|K00058|	| |	||	serA, PHGDH|serA, PHGDH|	http://www.genome.jp/kegg-bin/show_pathway?ko01200/K00058%09red
Ribosome	KEGG PATHWAY	ko03010	2	444	0.669636	0.723307	Dendrobium_GLEAN_10007231|Novel04558	K02901|K02951|	| |	||	RP-L27e, RPL27|RP-S12e, RPS12|	http://www.genome.jp/kegg-bin/show_pathway?ko03010/K02901%09red/K02951%09red
Viral carcinogenesis	KEGG PATHWAY	ko05203	1	217	0.675587	0.723307	Novel02888	K03363|	|	|	CDC20|	http://www.genome.jp/kegg-bin/show_pathway?ko05203/K03363%09red
Ubiquitin mediated proteolysis	KEGG PATHWAY	ko04120	1	227	0.691988	0.723307	Novel02888	K03363|	|	|	CDC20|	http://www.genome.jp/kegg-bin/show_pathway?ko04120/K03363%09red
Tuberculosis	KEGG PATHWAY	ko05152	1	227	0.691988	0.723307	Dendrobium_GLEAN_10023953	K04730|	|	|	IRAK1|	http://www.genome.jp/kegg-bin/show_pathway?ko05152/K04730%09red
Huntington's disease	KEGG PATHWAY	ko05016	1	228	0.693582	0.723307	Dendrobium_GLEAN_10092575	K05863|	|	|	SLC25A4S, ANT|	http://www.genome.jp/kegg-bin/show_pathway?ko05016/K05863%09red
Cell cycle	KEGG PATHWAY	ko04110	1	236	0.706044	0.725932	Novel02888	K03363|	|	|	CDC20|	http://www.genome.jp/kegg-bin/show_pathway?ko04110/K03363%09red
Epstein-Barr virus infection	KEGG PATHWAY	ko05169	1	257	0.736414	0.746642	Dendrobium_GLEAN_10023953	K04730|	|	|	IRAK1|	http://www.genome.jp/kegg-bin/show_pathway?ko05169/K04730%09red
Purine metabolism	KEGG PATHWAY	ko00230	1	404	0.877464	0.877464	Novel04626	K01514|	|	|	PRUNE, PPX1|	http://www.genome.jp/kegg-bin/show_pathway?ko00230/K01514%09red

## Sheet: S3 vs S4
##Databases: KEGG PATHWAY
##Statistical test method: hypergeometric test / Fisher's exact test
##FDR correction method: Benjamini and Hochberg
#Term	Database	ID	Input number	Background number	P-Value	Corrected P-Value	Input	KO	Entrez_ID	Ensembl_ID	KO_name	Hyperlink
Circadian rhythm - plant	KEGG PATHWAY	ko04712	6	95	0.000127003	0.0176534	Dendrobium_GLEAN_10096782|Dendrobium_GLEAN_10096781|Dendrobium_GLEAN_10018898|Dendrobium_GLEAN_10035338|Dendrobium_GLEAN_10054542|PEQU_07911-D2	K12133|K12133|K12133|K16241|K12130|K12133|	| | | | | |	||||||	LHY|LHY|LHY|HY5|PRR5|LHY|	http://www.genome.jp/kegg-bin/show_pathway?ko04712/K16241%09red/K12130%09red/K12133%09red
Vitamin B6 metabolism	KEGG PATHWAY	ko00750	2	13	0.00570054	0.322189	Dendrobium_GLEAN_10044295|Dendrobium_GLEAN_10084642	K06215|K13248|	| |	||	pdxS, pdx1|PHOSPHO2|	http://www.genome.jp/kegg-bin/show_pathway?ko00750/K06215%09red/K13248%09red
Protein processing in endoplasmic reticulum	KEGG PATHWAY	ko04141	8	355	0.00695371	0.322189	Dendrobium_GLEAN_10089059|Dendrobium_GLEAN_10042129|Dendrobium_GLEAN_10024322|Dendrobium_GLEAN_10019288|Dendrobium_GLEAN_10087099|Dendrobium_GLEAN_10016786|Dendrobium_GLEAN_10098456|Dendrobium_GLEAN_10032180	K09584|K13993|K13993|K13993|K13993|K13993|K14001|K13993|	| | | | | | | |	||||||||	PDIA6, TXNDC7|HSP20|HSP20|HSP20|HSP20|HSP20|SIL1, SLS1|HSP20|	http://www.genome.jp/kegg-bin/show_pathway?ko04141/K09584%09red/K14001%09red/K13993%09red
Toxoplasmosis	KEGG PATHWAY	ko05145	4	159	0.036579	0.637039	Novel04399|Dendrobium_GLEAN_10043656|Dendrobium_GLEAN_10068550|Dendrobium_GLEAN_10082937	K04730|K04371|K13412|K13412|	| | | |	||||	IRAK1|MAPK1_3|CPK|CPK|	http://www.genome.jp/kegg-bin/show_pathway?ko05145/K04371%09red/K04730%09red/K13412%09red
Plant hormone signal transduction	KEGG PATHWAY	ko04075	6	327	0.0430787	0.637039	Dendrobium_GLEAN_10038144|Dendrobium_GLEAN_10043315|Dendrobium_GLEAN_10039122|Novel05088|Dendrobium_GLEAN_10105519|Dendrobium_GLEAN_10017596	K14486|K14496|K16189|K14431|K14432|K13422|	| | | | | |	||||||	K14486, ARF|PYL|PIF4|TGA|ABF|MYC2|	http://www.genome.jp/kegg-bin/show_pathway?ko04075/K14486%09red/K14496%09red/K14432%09red/K14431%09red/K16189%09red/K13422%09red
Isoquinoline alkaloid biosynthesis	KEGG PATHWAY	ko00950	2	42	0.0444722	0.637039	Dendrobium_GLEAN_10032195|Dendrobium_GLEAN_10046548	K00422|K01592|	| |	||	E1.10.3.1|E4.1.1.25|	http://www.genome.jp/kegg-bin/show_pathway?ko00950/K00422%09red/K01592%09red
Plant-pathogen interaction	KEGG PATHWAY	ko04626	5	294	0.0797368	0.637039	Dendrobium_GLEAN_10068550|Dendrobium_GLEAN_10017596|Dendrobium_GLEAN_10078224|Dendrobium_GLEAN_10057390|Dendrobium_GLEAN_10082937	K13412|K13422|K13448|K13457|K13412|	| | | | |	|||||	CPK|MYC2|CML|RPM1, RPS3|CPK|	http://www.genome.jp/kegg-bin/show_pathway?ko04626/K13422%09red/K13457%09red/K13412%09red/K13448%09red
Glutamatergic synapse	KEGG PATHWAY	ko04724	2	64	0.0905662	0.637039	Novel03559|Dendrobium_GLEAN_10043656	K14207|K04371|	| |	||	SLC38A2, SNAT2|MAPK1_3|	http://www.genome.jp/kegg-bin/show_pathway?ko04724/K04371%09red/K14207%09red
Tyrosine metabolism	KEGG PATHWAY	ko00350	2	69	0.102413	0.637039	Dendrobium_GLEAN_10032195|Dendrobium_GLEAN_10046548	K00422|K01592|	| |	||	E1.10.3.1|E4.1.1.25|	http://www.genome.jp/kegg-bin/show_pathway?ko00350/K00422%09red/K01592%09red
Protein digestion and absorption	KEGG PATHWAY	ko04974	1	14	0.108604	0.637039	Novel03559	K14207|	|	|	SLC38A2, SNAT2|	http://www.genome.jp/kegg-bin/show_pathway?ko04974/K14207%09red
Aldosterone-regulated sodium reabsorption	KEGG PATHWAY	ko04960	1	14	0.108604	0.637039	Dendrobium_GLEAN_10043656	K04371|	|	|	MAPK1_3|	http://www.genome.jp/kegg-bin/show_pathway?ko04960/K04371%09red
Mineral absorption	KEGG PATHWAY	ko04978	1	16	0.122168	0.637039	Dendrobium_GLEAN_10055214	K00522|	|	|	FTH1|	http://www.genome.jp/kegg-bin/show_pathway?ko04978/K00522%09red
MAPK signaling pathway - fly	KEGG PATHWAY	ko04013	1	16	0.122168	0.637039	Dendrobium_GLEAN_10043656	K04371|	|	|	MAPK1_3|	http://www.genome.jp/kegg-bin/show_pathway?ko04013/K04371%09red
Degradation of aromatic compounds	KEGG PATHWAY	ko01220	1	17	0.128873	0.637039	Dendrobium_GLEAN_10026202	K00487|	|	|	CYP73A|	http://www.genome.jp/kegg-bin/show_pathway?ko01220/K00487%09red
cGMP-PKG signaling pathway	KEGG PATHWAY	ko04022	2	82	0.134959	0.637039	Dendrobium_GLEAN_10092575|Dendrobium_GLEAN_10043656	K05863|K04371|	| |	||	SLC25A4S, ANT|MAPK1_3|	http://www.genome.jp/kegg-bin/show_pathway?ko04022/K04371%09red/K05863%09red
Taurine and hypotaurine metabolism	KEGG PATHWAY	ko00430	1	18	0.135527	0.637039	Dendrobium_GLEAN_10045158	K18592|	|	|	GGT1_5|	http://www.genome.jp/kegg-bin/show_pathway?ko00430/K18592%09red
Serotonergic synapse	KEGG PATHWAY	ko04726	1	19	0.142131	0.637039	Dendrobium_GLEAN_10043656	K04371|	|	|	MAPK1_3|	http://www.genome.jp/kegg-bin/show_pathway?ko04726/K04371%09red
Platelet activation	KEGG PATHWAY	ko04611	1	19	0.142131	0.637039	Dendrobium_GLEAN_10043656	K04371|	|	|	MAPK1_3|	http://www.genome.jp/kegg-bin/show_pathway?ko04611/K04371%09red
Leishmaniasis	KEGG PATHWAY	ko05140	2	85	0.142768	0.637039	Novel04399|Dendrobium_GLEAN_10043656	K04730|K04371|	| |	||	IRAK1|MAPK1_3|	http://www.genome.jp/kegg-bin/show_pathway?ko05140/K04371%09red/K04730%09red
Methane metabolism	KEGG PATHWAY	ko00680	2	87	0.148026	0.637039	Dendrobium_GLEAN_10091825|Dendrobium_GLEAN_10067132	K00058|K00058|	| |	||	serA, PHGDH|serA, PHGDH|	http://www.genome.jp/kegg-bin/show_pathway?ko00680/K00058%09red
Bladder cancer	KEGG PATHWAY	ko05219	1	21	0.155188	0.637039	Dendrobium_GLEAN_10043656	K04371|	|	|	MAPK1_3|	http://www.genome.jp/kegg-bin/show_pathway?ko05219/K04371%09red
Thyroid cancer	KEGG PATHWAY	ko05216	1	21	0.155188	0.637039	Dendrobium_GLEAN_10043656	K04371|	|	|	MAPK1_3|	http://www.genome.jp/kegg-bin/show_pathway?ko05216/K04371%09red
Retrograde endocannabinoid signaling	KEGG PATHWAY	ko04723	1	23	0.168047	0.637039	Dendrobium_GLEAN_10043656	K04371|	|	|	MAPK1_3|	http://www.genome.jp/kegg-bin/show_pathway?ko04723/K04371%09red
Acute myeloid leukemia	KEGG PATHWAY	ko05221	1	23	0.168047	0.637039	Dendrobium_GLEAN_10043656	K04371|	|	|	MAPK1_3|	http://www.genome.jp/kegg-bin/show_pathway?ko05221/K04371%09red
mTOR signaling pathway	KEGG PATHWAY	ko04150	2	96	0.172135	0.637039	Dendrobium_GLEAN_10043656|Dendrobium_GLEAN_10067937	K04371|K07198|	| |	||	MAPK1_3|PRKAA, AMPK|	http://www.genome.jp/kegg-bin/show_pathway?ko04150/K04371%09red/K07198%09red
Prolactin signaling pathway	KEGG PATHWAY	ko04917	1	24	0.174403	0.637039	Dendrobium_GLEAN_10043656	K04371|	|	|	MAPK1_3|	http://www.genome.jp/kegg-bin/show_pathway?ko04917/K04371%09red
Melanoma	KEGG PATHWAY	ko05218	1	25	0.180711	0.637039	Dendrobium_GLEAN_10043656	K04371|	|	|	MAPK1_3|	http://www.genome.jp/kegg-bin/show_pathway?ko05218/K04371%09red
Dorso-ventral axis formation	KEGG PATHWAY	ko04320	1	25	0.180711	0.637039	Dendrobium_GLEAN_10043656	K04371|	|	|	MAPK1_3|	http://www.genome.jp/kegg-bin/show_pathway?ko04320/K04371%09red
Arachidonic acid metabolism	KEGG PATHWAY	ko00590	1	25	0.180711	0.637039	Dendrobium_GLEAN_10045158	K18592|	|	|	GGT1_5|	http://www.genome.jp/kegg-bin/show_pathway?ko00590/K18592%09red
Toll-like receptor signaling pathway	KEGG PATHWAY	ko04620	2	101	0.185794	0.637039	Novel04399|Dendrobium_GLEAN_10043656	K04730|K04371|	| |	||	IRAK1|MAPK1_3|	http://www.genome.jp/kegg-bin/show_pathway?ko04620/K04371%09red/K04730%09red
NOD-like receptor signaling pathway	KEGG PATHWAY	ko04621	1	26	0.186971	0.637039	Dendrobium_GLEAN_10043656	K04371|	|	|	MAPK1_3|	http://www.genome.jp/kegg-bin/show_pathway?ko04621/K04371%09red
Chronic myeloid leukemia	KEGG PATHWAY	ko05220	1	26	0.186971	0.637039	Dendrobium_GLEAN_10043656	K04371|	|	|	MAPK1_3|	http://www.genome.jp/kegg-bin/show_pathway?ko05220/K04371%09red
Non-small cell lung cancer	KEGG PATHWAY	ko05223	1	27	0.193184	0.637039	Dendrobium_GLEAN_10043656	K04371|	|	|	MAPK1_3|	http://www.genome.jp/kegg-bin/show_pathway?ko05223/K04371%09red
Prion diseases	KEGG PATHWAY	ko05020	1	28	0.199349	0.637039	Dendrobium_GLEAN_10043656	K04371|	|	|	MAPK1_3|	http://www.genome.jp/kegg-bin/show_pathway?ko05020/K04371%09red
Long-term depression	KEGG PATHWAY	ko04730	1	28	0.199349	0.637039	Dendrobium_GLEAN_10043656	K04371|	|	|	MAPK1_3|	http://www.genome.jp/kegg-bin/show_pathway?ko04730/K04371%09red
Signaling pathways regulating pluripotency of stem cells	KEGG PATHWAY	ko04550	1	29	0.205468	0.637039	Dendrobium_GLEAN_10043656	K04371|	|	|	MAPK1_3|	http://www.genome.jp/kegg-bin/show_pathway?ko04550/K04371%09red
Sesquiterpenoid and triterpenoid biosynthesis	KEGG PATHWAY	ko00909	1	30	0.21154	0.637039	Dendrobium_GLEAN_10129149	K15803|	|	|	GERD|	http://www.genome.jp/kegg-bin/show_pathway?ko00909/K15803%09red
Cholinergic synapse	KEGG PATHWAY	ko04725	1	30	0.21154	0.637039	Dendrobium_GLEAN_10043656	K04371|	|	|	MAPK1_3|	http://www.genome.jp/kegg-bin/show_pathway?ko04725/K04371%09red
TNF signaling pathway	KEGG PATHWAY	ko04668	1	31	0.217565	0.637039	Dendrobium_GLEAN_10043656	K04371|	|	|	MAPK1_3|	http://www.genome.jp/kegg-bin/show_pathway?ko04668/K04371%09red
Fc epsilon RI signaling pathway	KEGG PATHWAY	ko04664	1	32	0.223545	0.637039	Dendrobium_GLEAN_10043656	K04371|	|	|	MAPK1_3|	http://www.genome.jp/kegg-bin/show_pathway?ko04664/K04371%09red
Regulation of actin cytoskeleton	KEGG PATHWAY	ko04810	2	115	0.224727	0.637039	Dendrobium_GLEAN_10043656|Dendrobium_GLEAN_10025075	K04371|K00921|	| |	||	MAPK1_3|PIKFYVE, FAB1|	http://www.genome.jp/kegg-bin/show_pathway?ko04810/K04371%09red/K00921%09red
Pertussis	KEGG PATHWAY	ko05133	2	115	0.224727	0.637039	Novel04399|Dendrobium_GLEAN_10043656	K04730|K04371|	| |	||	IRAK1|MAPK1_3|	http://www.genome.jp/kegg-bin/show_pathway?ko05133/K04371%09red/K04730%09red
Chagas disease (American trypanosomiasis)	KEGG PATHWAY	ko05142	2	116	0.227535	0.637039	Novel04399|Dendrobium_GLEAN_10043656	K04730|K04371|	| |	||	IRAK1|MAPK1_3|	http://www.genome.jp/kegg-bin/show_pathway?ko05142/K04371%09red/K04730%09red
Chemokine signaling pathway	KEGG PATHWAY	ko04062	1	36	0.247014	0.637039	Dendrobium_GLEAN_10043656	K04371|	|	|	MAPK1_3|	http://www.genome.jp/kegg-bin/show_pathway?ko04062/K04371%09red
Pancreatic cancer	KEGG PATHWAY	ko05212	1	36	0.247014	0.637039	Dendrobium_GLEAN_10043656	K04371|	|	|	MAPK1_3|	http://www.genome.jp/kegg-bin/show_pathway?ko05212/K04371%09red
Endometrial cancer	KEGG PATHWAY	ko05213	1	37	0.25277	0.637039	Dendrobium_GLEAN_10043656	K04371|	|	|	MAPK1_3|	http://www.genome.jp/kegg-bin/show_pathway?ko05213/K04371%09red
Glycine, serine and threonine metabolism	KEGG PATHWAY	ko00260	2	126	0.255724	0.637039	Dendrobium_GLEAN_10091825|Dendrobium_GLEAN_10067132	K00058|K00058|	| |	||	serA, PHGDH|serA, PHGDH|	http://www.genome.jp/kegg-bin/show_pathway?ko00260/K00058%09red
Oxytocin signaling pathway	KEGG PATHWAY	ko04921	2	127	0.25855	0.637039	Dendrobium_GLEAN_10043656|Dendrobium_GLEAN_10067937	K04371|K07198|	| |	||	MAPK1_3|PRKAA, AMPK|	http://www.genome.jp/kegg-bin/show_pathway?ko04921/K04371%09red/K07198%09red
FoxO signaling pathway	KEGG PATHWAY	ko04068	2	130	0.267028	0.637039	Dendrobium_GLEAN_10043656|Dendrobium_GLEAN_10067937	K04371|K07198|	| |	||	MAPK1_3|PRKAA, AMPK|	http://www.genome.jp/kegg-bin/show_pathway?ko04068/K04371%09red/K07198%09red
ErbB signaling pathway	KEGG PATHWAY	ko04012	1	40	0.269777	0.637039	Dendrobium_GLEAN_10043656	K04371|	|	|	MAPK1_3|	http://www.genome.jp/kegg-bin/show_pathway?ko04012/K04371%09red
Renal cell carcinoma	KEGG PATHWAY	ko05211	1	40	0.269777	0.637039	Dendrobium_GLEAN_10043656	K04371|	|	|	MAPK1_3|	http://www.genome.jp/kegg-bin/show_pathway?ko05211/K04371%09red
Circadian entrainment	KEGG PATHWAY	ko04713	1	43	0.286398	0.637039	Dendrobium_GLEAN_10043656	K04371|	|	|	MAPK1_3|	http://www.genome.jp/kegg-bin/show_pathway?ko04713/K04371%09red
Shigellosis	KEGG PATHWAY	ko05131	1	44	0.291855	0.637039	Dendrobium_GLEAN_10043656	K04371|	|	|	MAPK1_3|	http://www.genome.jp/kegg-bin/show_pathway?ko05131/K04371%09red
Natural killer cell mediated cytotoxicity	KEGG PATHWAY	ko04650	1	45	0.29727	0.637039	Dendrobium_GLEAN_10043656	K04371|	|	|	MAPK1_3|	http://www.genome.jp/kegg-bin/show_pathway?ko04650/K04371%09red
Salmonella infection	KEGG PATHWAY	ko05132	1	45	0.29727	0.637039	Dendrobium_GLEAN_10043656	K04371|	|	|	MAPK1_3|	http://www.genome.jp/kegg-bin/show_pathway?ko05132/K04371%09red
Hypertrophic cardiomyopathy (HCM)	KEGG PATHWAY	ko05410	1	45	0.29727	0.637039	Dendrobium_GLEAN_10067937	K07198|	|	|	PRKAA, AMPK|	http://www.genome.jp/kegg-bin/show_pathway?ko05410/K07198%09red
T cell receptor signaling pathway	KEGG PATHWAY	ko04660	1	45	0.29727	0.637039	Dendrobium_GLEAN_10043656	K04371|	|	|	MAPK1_3|	http://www.genome.jp/kegg-bin/show_pathway?ko04660/K04371%09red
Vascular smooth muscle contraction	KEGG PATHWAY	ko04270	1	46	0.302644	0.637039	Dendrobium_GLEAN_10043656	K04371|	|	|	MAPK1_3|	http://www.genome.jp/kegg-bin/show_pathway?ko04270/K04371%09red
Cutin, suberine and wax biosynthesis	KEGG PATHWAY	ko00073	1	46	0.302644	0.637039	Dendrobium_GLEAN_10130253	K15402|	|	|	CYP86B1|	http://www.genome.jp/kegg-bin/show_pathway?ko00073/K15402%09red
Adherens junction	KEGG PATHWAY	ko04520	1	47	0.307977	0.637039	Dendrobium_GLEAN_10043656	K04371|	|	|	MAPK1_3|	http://www.genome.jp/kegg-bin/show_pathway?ko04520/K04371%09red
Osteoclast differentiation	KEGG PATHWAY	ko04380	1	47	0.307977	0.637039	Dendrobium_GLEAN_10043656	K04371|	|	|	MAPK1_3|	http://www.genome.jp/kegg-bin/show_pathway?ko04380/K04371%09red
Stilbenoid, diarylheptanoid and gingerol biosynthesis	KEGG PATHWAY	ko00945	1	48	0.313269	0.637039	Dendrobium_GLEAN_10026202	K00487|	|	|	CYP73A|	http://www.genome.jp/kegg-bin/show_pathway?ko00945/K00487%09red
Gap junction	KEGG PATHWAY	ko04540	1	51	0.328906	0.637039	Dendrobium_GLEAN_10043656	K04371|	|	|	MAPK1_3|	http://www.genome.jp/kegg-bin/show_pathway?ko04540/K04371%09red
Focal adhesion	KEGG PATHWAY	ko04510	1	51	0.328906	0.637039	Dendrobium_GLEAN_10043656	K04371|	|	|	MAPK1_3|	http://www.genome.jp/kegg-bin/show_pathway?ko04510/K04371%09red
B cell receptor signaling pathway	KEGG PATHWAY	ko04662	1	51	0.328906	0.637039	Dendrobium_GLEAN_10043656	K04371|	|	|	MAPK1_3|	http://www.genome.jp/kegg-bin/show_pathway?ko04662/K04371%09red
Type II diabetes mellitus	KEGG PATHWAY	ko04930	1	51	0.328906	0.637039	Dendrobium_GLEAN_10043656	K04371|	|	|	MAPK1_3|	http://www.genome.jp/kegg-bin/show_pathway?ko04930/K04371%09red
VEGF signaling pathway	KEGG PATHWAY	ko04370	1	53	0.339133	0.637039	Dendrobium_GLEAN_10043656	K04371|	|	|	MAPK1_3|	http://www.genome.jp/kegg-bin/show_pathway?ko04370/K04371%09red
Colorectal cancer	KEGG PATHWAY	ko05210	1	54	0.344188	0.637039	Dendrobium_GLEAN_10043656	K04371|	|	|	MAPK1_3|	http://www.genome.jp/kegg-bin/show_pathway?ko05210/K04371%09red
Rap1 signaling pathway	KEGG PATHWAY	ko04015	1	54	0.344188	0.637039	Dendrobium_GLEAN_10043656	K04371|	|	|	MAPK1_3|	http://www.genome.jp/kegg-bin/show_pathway?ko04015/K04371%09red
Hepatitis B	KEGG PATHWAY	ko05161	1	54	0.344188	0.637039	Dendrobium_GLEAN_10043656	K04371|	|	|	MAPK1_3|	http://www.genome.jp/kegg-bin/show_pathway?ko05161/K04371%09red
Hepatitis C	KEGG PATHWAY	ko05160	1	55	0.349205	0.637039	Dendrobium_GLEAN_10043656	K04371|	|	|	MAPK1_3|	http://www.genome.jp/kegg-bin/show_pathway?ko05160/K04371%09red
Nitrogen metabolism	KEGG PATHWAY	ko00910	1	56	0.354184	0.637039	Dendrobium_GLEAN_10091209	K01673|	|	|	cynT, can|	http://www.genome.jp/kegg-bin/show_pathway?ko00910/K01673%09red
Flavonoid biosynthesis	KEGG PATHWAY	ko00941	1	56	0.354184	0.637039	Dendrobium_GLEAN_10026202	K00487|	|	|	CYP73A|	http://www.genome.jp/kegg-bin/show_pathway?ko00941/K00487%09red
Insulin signaling pathway	KEGG PATHWAY	ko04910	2	162	0.356644	0.637039	Dendrobium_GLEAN_10043656|Dendrobium_GLEAN_10067937	K04371|K07198|	| |	||	MAPK1_3|PRKAA, AMPK|	http://www.genome.jp/kegg-bin/show_pathway?ko04910/K04371%09red/K07198%09red
Axon guidance	KEGG PATHWAY	ko04360	1	57	0.359124	0.637039	Dendrobium_GLEAN_10043656	K04371|	|	|	MAPK1_3|	http://www.genome.jp/kegg-bin/show_pathway?ko04360/K04371%09red
TGF-beta signaling pathway	KEGG PATHWAY	ko04350	1	57	0.359124	0.637039	Dendrobium_GLEAN_10043656	K04371|	|	|	MAPK1_3|	http://www.genome.jp/kegg-bin/show_pathway?ko04350/K04371%09red
GABAergic synapse	KEGG PATHWAY	ko04727	1	58	0.364028	0.637039	Novel03559	K14207|	|	|	SLC38A2, SNAT2|	http://www.genome.jp/kegg-bin/show_pathway?ko04727/K14207%09red
Melanogenesis	KEGG PATHWAY	ko04916	1	58	0.364028	0.637039	Dendrobium_GLEAN_10043656	K04371|	|	|	MAPK1_3|	http://www.genome.jp/kegg-bin/show_pathway?ko04916/K04371%09red
Glioma	KEGG PATHWAY	ko05214	1	59	0.368893	0.637039	Dendrobium_GLEAN_10043656	K04371|	|	|	MAPK1_3|	http://www.genome.jp/kegg-bin/show_pathway?ko05214/K04371%09red
Diterpenoid biosynthesis	KEGG PATHWAY	ko00904	1	59	0.368893	0.637039	Dendrobium_GLEAN_10065001	K17982|	|	|	TPS04, GES|	http://www.genome.jp/kegg-bin/show_pathway?ko00904/K17982%09red
Prostate cancer	KEGG PATHWAY	ko05215	1	60	0.373722	0.637039	Dendrobium_GLEAN_10043656	K04371|	|	|	MAPK1_3|	http://www.genome.jp/kegg-bin/show_pathway?ko05215/K04371%09red
HTLV-I infection	KEGG PATHWAY	ko05166	2	169	0.375807	0.637039	Dendrobium_GLEAN_10092575|Novel02888	K05863|K03363|	| |	||	SLC25A4S, ANT|CDC20|	http://www.genome.jp/kegg-bin/show_pathway?ko05166/K03363%09red/K05863%09red
Neurotrophin signaling pathway	KEGG PATHWAY	ko04722	2	175	0.392046	0.656559	Novel04399|Dendrobium_GLEAN_10043656	K04730|K04371|	| |	||	IRAK1|MAPK1_3|	http://www.genome.jp/kegg-bin/show_pathway?ko04722/K04371%09red/K04730%09red
Ubiquinone and other terpenoid-quinone biosynthesis	KEGG PATHWAY	ko00130	1	66	0.401933	0.665103	Dendrobium_GLEAN_10026202	K00487|	|	|	CYP73A|	http://www.genome.jp/kegg-bin/show_pathway?ko00130/K00487%09red
Estrogen signaling pathway	KEGG PATHWAY	ko04915	1	69	0.41556	0.674244	Dendrobium_GLEAN_10043656	K04371|	|	|	MAPK1_3|	http://www.genome.jp/kegg-bin/show_pathway?ko04915/K04371%09red
PI3K-Akt signaling pathway	KEGG PATHWAY	ko04151	2	190	0.431775	0.674244	Dendrobium_GLEAN_10043656|Dendrobium_GLEAN_10067937	K04371|K07198|	| |	||	MAPK1_3|PRKAA, AMPK|	http://www.genome.jp/kegg-bin/show_pathway?ko04151/K04371%09red/K07198%09red
Circadian rhythm	KEGG PATHWAY	ko04710	1	73	0.433251	0.674244	Dendrobium_GLEAN_10067937	K07198|	|	|	PRKAA, AMPK|	http://www.genome.jp/kegg-bin/show_pathway?ko04710/K07198%09red
GnRH signaling pathway	KEGG PATHWAY	ko04912	1	74	0.43759	0.674244	Dendrobium_GLEAN_10043656	K04371|	|	|	MAPK1_3|	http://www.genome.jp/kegg-bin/show_pathway?ko04912/K04371%09red
MAPK signaling pathway	KEGG PATHWAY	ko04010	1	75	0.441896	0.674244	Dendrobium_GLEAN_10043656	K04371|	|	|	MAPK1_3|	http://www.genome.jp/kegg-bin/show_pathway?ko04010/K04371%09red
Ribosome	KEGG PATHWAY	ko03010	4	444	0.447081	0.674244	Dendrobium_GLEAN_10007231|Dendrobium_GLEAN_10003360|Dendrobium_GLEAN_10044117|Novel04558	K02901|K02931|K02937|K02951|	| | | |	||||	RP-L27e, RPL27|RP-L5, MRPL5, rplE|RP-L7e, RPL7|RP-S12e, RPS12|	http://www.genome.jp/kegg-bin/show_pathway?ko03010/K02931%09red/K02901%09red/K02951%09red/K02937%09red
Cyanoamino acid metabolism	KEGG PATHWAY	ko00460	1	77	0.450409	0.674244	Dendrobium_GLEAN_10045158	K18592|	|	|	GGT1_5|	http://www.genome.jp/kegg-bin/show_pathway?ko00460/K18592%09red
Oocyte meiosis	KEGG PATHWAY	ko04114	2	198	0.452399	0.674244	Dendrobium_GLEAN_10043656|Novel02888	K04371|K03363|	| |	||	MAPK1_3|CDC20|	http://www.genome.jp/kegg-bin/show_pathway?ko04114/K04371%09red/K03363%09red
Thyroid hormone signaling pathway	KEGG PATHWAY	ko04919	1	78	0.454617	0.674244	Dendrobium_GLEAN_10043656	K04371|	|	|	MAPK1_3|	http://www.genome.jp/kegg-bin/show_pathway?ko04919/K04371%09red
Long-term potentiation	KEGG PATHWAY	ko04720	1	79	0.458793	0.674244	Dendrobium_GLEAN_10043656	K04371|	|	|	MAPK1_3|	http://www.genome.jp/kegg-bin/show_pathway?ko04720/K04371%09red
Base excision repair	KEGG PATHWAY	ko03410	1	81	0.46705	0.674244	Dendrobium_GLEAN_10074935	K03575|	|	|	mutY|	http://www.genome.jp/kegg-bin/show_pathway?ko03410/K03575%09red
Regulation of autophagy	KEGG PATHWAY	ko04140	1	82	0.471132	0.674244	Dendrobium_GLEAN_10067937	K07198|	|	|	PRKAA, AMPK|	http://www.genome.jp/kegg-bin/show_pathway?ko04140/K07198%09red
Calcium signaling pathway	KEGG PATHWAY	ko04020	1	82	0.471132	0.674244	Dendrobium_GLEAN_10092575	K05863|	|	|	SLC25A4S, ANT|	http://www.genome.jp/kegg-bin/show_pathway?ko04020/K05863%09red
HIF-1 signaling pathway	KEGG PATHWAY	ko04066	1	85	0.48319	0.674244	Dendrobium_GLEAN_10043656	K04371|	|	|	MAPK1_3|	http://www.genome.jp/kegg-bin/show_pathway?ko04066/K04371%09red
Progesterone-mediated oocyte maturation	KEGG PATHWAY	ko04914	1	85	0.48319	0.674244	Dendrobium_GLEAN_10043656	K04371|	|	|	MAPK1_3|	http://www.genome.jp/kegg-bin/show_pathway?ko04914/K04371%09red
Adipocytokine signaling pathway	KEGG PATHWAY	ko04920	1	86	0.487149	0.674244	Dendrobium_GLEAN_10067937	K07198|	|	|	PRKAA, AMPK|	http://www.genome.jp/kegg-bin/show_pathway?ko04920/K07198%09red
Proteoglycans in cancer	KEGG PATHWAY	ko05205	1	88	0.494975	0.674244	Dendrobium_GLEAN_10043656	K04371|	|	|	MAPK1_3|	http://www.genome.jp/kegg-bin/show_pathway?ko05205/K04371%09red
Ras signaling pathway	KEGG PATHWAY	ko04014	1	89	0.498844	0.674244	Dendrobium_GLEAN_10043656	K04371|	|	|	MAPK1_3|	http://www.genome.jp/kegg-bin/show_pathway?ko04014/K04371%09red
Viral carcinogenesis	KEGG PATHWAY	ko05203	2	217	0.499619	0.674244	Dendrobium_GLEAN_10043656|Novel02888	K04371|K03363|	| |	||	MAPK1_3|CDC20|	http://www.genome.jp/kegg-bin/show_pathway?ko05203/K04371%09red/K03363%09red
Adrenergic signaling in cardiomyocytes	KEGG PATHWAY	ko04261	1	91	0.506493	0.675505	Dendrobium_GLEAN_10043656	K04371|	|	|	MAPK1_3|	http://www.genome.jp/kegg-bin/show_pathway?ko04261/K04371%09red
alpha-Linolenic acid metabolism	KEGG PATHWAY	ko00592	1	92	0.510274	0.675505	Dendrobium_GLEAN_10011381	K05894|	|	|	OPR|	http://www.genome.jp/kegg-bin/show_pathway?ko00592/K05894%09red
Phenylpropanoid biosynthesis	KEGG PATHWAY	ko00940	2	226	0.521066	0.679945	Dendrobium_GLEAN_10051330|Dendrobium_GLEAN_10026202	K13066|K00487|	| |	||	E2.1.1.68, COMT|CYP73A|	http://www.genome.jp/kegg-bin/show_pathway?ko00940/K00487%09red/K13066%09red
Tuberculosis	KEGG PATHWAY	ko05152	2	227	0.523411	0.679945	Novel04399|Dendrobium_GLEAN_10043656	K04730|K04371|	| |	||	IRAK1|MAPK1_3|	http://www.genome.jp/kegg-bin/show_pathway?ko05152/K04371%09red/K04730%09red
Inositol phosphate metabolism	KEGG PATHWAY	ko00562	1	101	0.54303	0.697354	Dendrobium_GLEAN_10025075	K00921|	|	|	PIKFYVE, FAB1|	http://www.genome.jp/kegg-bin/show_pathway?ko00562/K00921%09red
Apoptosis	KEGG PATHWAY	ko04210	1	103	0.550008	0.697354	Novel04399	K04730|	|	|	IRAK1|	http://www.genome.jp/kegg-bin/show_pathway?ko04210/K04730%09red
NF-kappa B signaling pathway	KEGG PATHWAY	ko04064	1	104	0.553457	0.697354	Novel04399	K04730|	|	|	IRAK1|	http://www.genome.jp/kegg-bin/show_pathway?ko04064/K04730%09red
Fructose and mannose metabolism	KEGG PATHWAY	ko00051	1	105	0.55688	0.697354	Dendrobium_GLEAN_10040670	K00895|	|	|	E2.7.1.90, pfk|	http://www.genome.jp/kegg-bin/show_pathway?ko00051/K00895%09red
Fc gamma R-mediated phagocytosis	KEGG PATHWAY	ko04666	1	110	0.573607	0.711887	Dendrobium_GLEAN_10043656	K04371|	|	|	MAPK1_3|	http://www.genome.jp/kegg-bin/show_pathway?ko04666/K04371%09red
Phosphatidylinositol signaling system	KEGG PATHWAY	ko04070	1	113	0.583339	0.717559	Dendrobium_GLEAN_10025075	K00921|	|	|	PIKFYVE, FAB1|	http://www.genome.jp/kegg-bin/show_pathway?ko04070/K00921%09red
Pathways in cancer	KEGG PATHWAY	ko05200	1	115	0.589705	0.719026	Dendrobium_GLEAN_10043656	K04371|	|	|	MAPK1_3|	http://www.genome.jp/kegg-bin/show_pathway?ko05200/K04371%09red
cAMP signaling pathway	KEGG PATHWAY	ko04024	1	117	0.595974	0.720351	Dendrobium_GLEAN_10043656	K04371|	|	|	MAPK1_3|	http://www.genome.jp/kegg-bin/show_pathway?ko04024/K04371%09red
Measles	KEGG PATHWAY	ko05162	1	128	0.628786	0.750678	Novel04399	K04730|	|	|	IRAK1|	http://www.genome.jp/kegg-bin/show_pathway?ko05162/K04730%09red
MicroRNAs in cancer	KEGG PATHWAY	ko05206	1	131	0.637266	0.750678	Dendrobium_GLEAN_10051326	K13863|	|	|	SLC7A1, ATRC1|	http://www.genome.jp/kegg-bin/show_pathway?ko05206/K13863%09red
Alcoholism	KEGG PATHWAY	ko05034	1	131	0.637266	0.750678	Dendrobium_GLEAN_10043656	K04371|	|	|	MAPK1_3|	http://www.genome.jp/kegg-bin/show_pathway?ko05034/K04371%09red
Phagosome	KEGG PATHWAY	ko04145	1	139	0.658947	0.766313	Dendrobium_GLEAN_10025075	K00921|	|	|	PIKFYVE, FAB1|	http://www.genome.jp/kegg-bin/show_pathway?ko04145/K00921%09red
Meiosis - yeast	KEGG PATHWAY	ko04113	1	140	0.661565	0.766313	Novel02888	K03363|	|	|	CDC20|	http://www.genome.jp/kegg-bin/show_pathway?ko04113/K03363%09red
Influenza A	KEGG PATHWAY	ko05164	1	144	0.671838	0.771781	Dendrobium_GLEAN_10043656	K04371|	|	|	MAPK1_3|	http://www.genome.jp/kegg-bin/show_pathway?ko05164/K04371%09red
Glutathione metabolism	KEGG PATHWAY	ko00480	1	153	0.693833	0.790514	Dendrobium_GLEAN_10045158	K18592|	|	|	GGT1_5|	http://www.genome.jp/kegg-bin/show_pathway?ko00480/K18592%09red
Phenylalanine metabolism	KEGG PATHWAY	ko00360	1	156	0.700833	0.791999	Dendrobium_GLEAN_10026202	K00487|	|	|	CYP73A|	http://www.genome.jp/kegg-bin/show_pathway?ko00360/K00487%09red
Non-alcoholic fatty liver disease (NAFLD)	KEGG PATHWAY	ko04932	1	165	0.720894	0.808099	Dendrobium_GLEAN_10067937	K07198|	|	|	PRKAA, AMPK|	http://www.genome.jp/kegg-bin/show_pathway?ko04932/K07198%09red
Glycerophospholipid metabolism	KEGG PATHWAY	ko00564	1	169	0.729375	0.811065	Dendrobium_GLEAN_10073035	K14156|	|	|	CHK|	http://www.genome.jp/kegg-bin/show_pathway?ko00564/K14156%09red
Parkinson's disease	KEGG PATHWAY	ko05012	1	176	0.743603	0.818163	Dendrobium_GLEAN_10092575	K05863|	|	|	SLC25A4S, ANT|	http://www.genome.jp/kegg-bin/show_pathway?ko05012/K05863%09red
AMPK signaling pathway	KEGG PATHWAY	ko04152	1	178	0.74753	0.818163	Dendrobium_GLEAN_10067937	K07198|	|	|	PRKAA, AMPK|	http://www.genome.jp/kegg-bin/show_pathway?ko04152/K07198%09red
Alzheimer's disease	KEGG PATHWAY	ko05010	1	188	0.766286	0.827624	Dendrobium_GLEAN_10043656	K04371|	|	|	MAPK1_3|	http://www.genome.jp/kegg-bin/show_pathway?ko05010/K04371%09red
Cell cycle - yeast	KEGG PATHWAY	ko04111	1	189	0.768083	0.827624	Novel02888	K03363|	|	|	CDC20|	http://www.genome.jp/kegg-bin/show_pathway?ko04111/K03363%09red
Biosynthesis of amino acids	KEGG PATHWAY	ko01230	2	392	0.80545	0.861212	Dendrobium_GLEAN_10091825|Dendrobium_GLEAN_10067132	K00058|K00058|	| |	||	serA, PHGDH|serA, PHGDH|	http://www.genome.jp/kegg-bin/show_pathway?ko01230/K00058%09red
Ubiquitin mediated proteolysis	KEGG PATHWAY	ko04120	1	227	0.827092	0.867178	Novel02888	K03363|	|	|	CDC20|	http://www.genome.jp/kegg-bin/show_pathway?ko04120/K03363%09red
Huntington's disease	KEGG PATHWAY	ko05016	1	228	0.828424	0.867178	Dendrobium_GLEAN_10092575	K05863|	|	|	SLC25A4S, ANT|	http://www.genome.jp/kegg-bin/show_pathway?ko05016/K05863%09red
RNA degradation	KEGG PATHWAY	ko03018	1	229	0.829746	0.867178	Dendrobium_GLEAN_10080018	K12592|	|	|	C1D, LRP1|	http://www.genome.jp/kegg-bin/show_pathway?ko03018/K12592%09red
Cell cycle	KEGG PATHWAY	ko04110	1	236	0.838719	0.870014	Novel02888	K03363|	|	|	CDC20|	http://www.genome.jp/kegg-bin/show_pathway?ko04110/K03363%09red
Carbon metabolism	KEGG PATHWAY	ko01200	2	441	0.854508	0.879827	Dendrobium_GLEAN_10091825|Dendrobium_GLEAN_10067132	K00058|K00058|	| |	||	serA, PHGDH|serA, PHGDH|	http://www.genome.jp/kegg-bin/show_pathway?ko01200/K00058%09red
Epstein-Barr virus infection	KEGG PATHWAY	ko05169	1	257	0.862911	0.881946	Novel04399	K04730|	|	|	IRAK1|	http://www.genome.jp/kegg-bin/show_pathway?ko05169/K04730%09red
RNA transport	KEGG PATHWAY	ko03013	1	328	0.920945	0.93439	Novel01491	K14288|	|	|	XPOT|	http://www.genome.jp/kegg-bin/show_pathway?ko03013/K14288%09red
Starch and sucrose metabolism	KEGG PATHWAY	ko00500	1	353	0.9349	0.941674	Dendrobium_GLEAN_10110605	K01087|	|	|	otsB|	http://www.genome.jp/kegg-bin/show_pathway?ko00500/K01087%09red
Purine metabolism	KEGG PATHWAY	ko00230	1	404	0.956223	0.956223	Novel04626	K01514|	|	|	PRUNE, PPX1|	http://www.genome.jp/kegg-bin/show_pathway?ko00230/K01514%09red
