# Supplementary material for: Identification and analysis of sucrose synthase gene family associated with polysaccharide biosynthesis in Dendrobium catenatum by transcriptomic analysis
Source: PeerJ. 2022 Apr 5;10:e13222. doi: 10.7717/peerj.13222 (PMC8992646; doi:10.7717/peerj.13222)
Supplement: Table S12 [file peerj-10-13222-s017.xlsx]

## Sheet: Expression of tissues
	root	root	root	leaf	leaf	leaf	pedicel	pedicel	pedicel	dorsal sepals	dorsal sepals	dorsal sepals	lateral sepals	lateral sepals	lateral sepals	petals	petals	petals	lip	lip	lip	column	column	column	S1	S1	S1	S2	S2	S2	S3	S3	S3	S4	S4	S4
GAPDH	32.6265	32.9015	32.9252	32.9443	31.9517	31.9275	32.279	31.9342	32.1282	32.0138	32.3287	32.446	31.4527	32.1186	31.7834	32.3802	32.1465	31.9464	31.9616	31.9336	31.7625	32.2679	32.0341	31.9648	32.3964	32.2334	32.2163	30.9629	31.1088	30.8201	25.7719	24.3955	26.3868	33.1308	33.5651	32.7475
DcSUS1	32.7848	31.9844	32.0763	31.9226	31.4283	31.5959	31.5619	31.5992	31.6332	31.5944	32.1748	31.908	31.6616	32.4129	31.6585	31.3399	31.9564	31.8118	31.5699	32.2125	31.717	31.5489	32.0444	31.8424	40.2465	40.0315	40.1727	33.2923	32.9	33.9316	39.561	39.1894	39.1431	38.1746	38.9393	38.6406
DcSUS2	31.1781	30.4089	30.6128	36.3222	36.0596	35.8853	26.128	25.7077	25.7131	27.0389	26.5123	26.5483	29.0049	28.3298	28.2693	32.897	32.505	31.9655	33.9434	33.0589	32.7033	36.5142	35.0796	35.0834	30.01	30.7528	30.5494	32.7133	31.2761	32.7983	35.2635	33.3046	35.7057	34.1053	34.8266	34.9463
DcSUS3	27.9321	27.8177	27.8591	27.3095	27.203	27.3042	27.3171	27.2164	27.258	27.2581	27.3376	27.3377	27.1312	27.4949	26.7653	27.2878	27.3043	27.4709	27.13	27.3258	27.3139	27.292	27.3984	27.3705	30.8378	31.6974	31.3413	33.202	33.6102	33.6689	34.1911	33.8912	33.5967	32.1523	32.2983	31.2789
DcSUS4	27.8586	28.4392	28.3284	27.3149	27.3403	27.8655	27.9168	27.7084	27.6759	27.7478	27.8372	27.6436	27.5042	27.2387	27.6602	27.7095	27.7809	27.9224	28.3574	27.6473	27.3947	28.2622	27.7027	27.5968	33.9137	31.995	33.21	25.5704	24.9523	25.1421	27.4706	27.6105	28.329	26.3687	26.5451	26.3599
DcSUS5	35.5629	35.9627	35.6213	35.6072	35.7008	36.1426	26.6462	26.4922	26.4707	27.1142	27.2795	27.555	26.5279	26.7074	26.958	33.8513	33.1669	33.6386	34.0215	34.1098	34.2574	38.509	38.0041	38.0616	35.1738	33.1971	34.1659	39.761	39.0614	39.9533	35.3951	36.3313	35.7337	35.2311	34.3667	35.6555
DcSUS6	27.7958	27.9557	27.9597	27.0163	26.935	26.8499	26.9612	26.729	26.8279	27.0179	26.9645	26.8954	26.9064	26.8054	26.6551	27.0791	26.9647	26.9828	27.0899	26.951	26.8479	27.1184	26.7299	26.8171	42.043	42.9	42.9316	35.1696	35.5472	35.8045	40.8171	40.9234	40.4966	34.1584	34.7355	34.5542
DcSUS7	35.4278	36.7088	36.3034	34.8409	33.5192	34.2208	29.1553	28.4196	28.8271	30.0552	30.4176	31.9504	30.5258	29.6933	29.5824	38.7439	37.5025	38.9394	38.09	38.0056	38.4007	34.4233	34.5422	34.4155	35.8364	35.9277	35.2862	33.1243	33.4149	33.084	32.8844	33.5747	32.2363	33.5966	33.817	33.0952
DcSUS8	31.0647	31.9597	30.9873	30.1385	30.404	30.0423	24.7978	24.8162	24.7903	26.3285	26.1209	26.2174	27.7692	28.0124	27.9483	29.7333	29.6493	29.7785	29.5441	29.5174	29.5259	30.268	30.7176	30.2097	25.5317	25.3005	25.3321	29.8715	29.0924	29.2921	30.2334	30.7426	30.201	31.569	31.1002	31.2511
DcSUS9	25.9537	24.5245	25.5923	24.1875	24.2871	24.1445	24.2283	24.1063	24.1624	24.3108	24.1421	24.0983	24.2332	23.9793	24.3606	24.2379	24.1482	24.2541	23.9401	24.2728	23.9471	24.1281	24.1327	24.2858	29.944	29.6849	30.0018	32.7684	32.5472	32.8045	33.68	34.7997	34.1012	33.2163	32.7477	32.9211
DcSUS10	25.9547	25.0085	25.9286	25.4525	25.331	25.5258	25.3638	25.3558	25.4542	25.3321	25.4077	25.529	25.3408	25.6575	25.8038	25.4085	25.4055	25.0795	25.3533	25.59	25.5475	25.5183	25.3442	25.5562	42.0581	42.0251	41.7433	39.0018	39.5542	39.805	35.0087	35.68	35.7997	34.9695	35.6587	35.1169
DcSUS11	30.8531	30.9381	30.6689	30.2619	29.6568	29.7618	30.1262	29.6601	29.6838	29.8838	29.7356	29.5167	29.6483	29.6283	29.3098	30.0498	29.6872	30.85	29.6644	29.5977	29.5716	29.7719	29.3874	29.6331	32.7	32.0952	32.2507	34.9	34.9316	34.244	37.4845	37.3666	37.4862	42.4862	42.1402	42.1133
DcSUS12	34.15	34.1304	34.969	31.9137	31.995	31.21	26.6344	26.9064	26.8768	27.1837	26.8215	26.8344	28.5928	29.1054	28.8913	31.6954	32.7424	31.9257	31.2528	31.3761	31.6946	32.0795	32.4486	32.0834	32.0251	31.7433	32.1012	31.9197	31.9277	31.2862	32.244	32.1002	31.6906	32.0952	32.2507	32.1458
DcSUS13	30.9746	31.983	30.9054	29.998	29.7735	30.2433	30.0434	30.2143	29.9872	30.3928	30.1667	29.9188	30.4166	30.1675	30.1709	29.7906	29.9286	30.1167	29.9026	30.0909	30.3001	29.8914	30.5991	30.0779	36.6849	36.805	36.9197	31.9234	31.4236	31.574	36.761	36.7654	34.7888	32.2629	32.5303	32.4872
DcSUS14	31.9881	30.5989	31.0251	29.8585	29.7879	29.5268	29.9095	29.8134	30.3887	29.8379	30.0798	30.2476	30.1352	30.0784	29.9288	29.8842	29.9141	29.5328	29.9853	29.7073	29.606	29.555	29.834	29.8352	27.4884	27.987	27.121	30.0922	30.9352	30.6556	30.7153	30.9115	31.4512	36.5803	36.7236	36.659
DcSUS15	25.5239	24.9272	25.0276	25.2068	24.8913	24.6941	24.9024	24.8395	24.5496	24.9909	24.6486	24.694	24.6559	24.824	24.9847	24.7436	24.646	24.8915	24.8962	24.7409	24.789	24.6787	24.8098	25.0982	41.4803	41.2465	41.8058	35.4486	35.0834	35.2163	35.7481	34.9264	34.9695	35.6587	35.7481	34.9264

## Sheet: Validated RNA-Seq
GeneID	S1	S1	S1	S2	S2	S2	S3	S3	S3	S4	S4	S4
18S	12.5	12.47	12.48	10.72	10.71	10.7	12.65	12.65	12.65	11.04	11.02	11
Dendrobium_GLEAN_10071332	25.78	25.76	25.81	24.69	24.7	24.69	26.88	26.77	26.83	28.25	28.17	28.16
Dendrobium_GLEAN_10071336	23.83	23.77	23.79	22.1	22.09	22.08	24.6	24.66	24.57	25.11	25.14	25.16
Dendrobium_GLEAN_10023268	25.72	25.77	25.88	25.95	25.83	25.98	28.49	28.52	28.48	26.94	26.92	26.83
Dendrobium_GLEAN_10023269	25.86	25.87	25.91	25.19	25.29	25.21	27.3	27.26	27.34	26.2	26.09	26.07
Dendrobium_GLEAN_10109385	29.52	29.49	29.44	26.43	26.51	26.44	28.78	28.64	28.78	26.71	26.63	26.67
Dendrobium_GLEAN_10121160	31.04	30.76	31.22	27.37	27.35	27.36	32.2	32.35	32.79	31.86	31.52	32.31
Dendrobium_GLEAN_10021052	27.35	27.33	27.38	25.74	25.72	25.64	27.74	27.86	27.82	27.03	26.99	27.03
Dendrobium_GLEAN_10051720	25.33	25.47	25.47	24.21	24.15	24.15	26.59	26.6	26.59	25.83	25.88	25.95
Dendrobium_GLEAN_10125412	26.77	26.82	26.86	26.5	26.45	26.46	29.5	29.44	29.52	27.13	27.17	27.12
Dendrobium_GLEAN_10026326	25.25	25.33	25.23	24.03	24.02	24.08	27.14	27.16	27.14	23.6	23.5	23.51
Dendrobium_GLEAN_10128035	25.62	25.62	25.59	24.02	24.04	24.06	26.05	25.94	26.08	24.03	24.07	24.04
Dendrobium_GLEAN_10077593	28.6	28.57	28.6	26.89	26.9	26.91	30.11	30.22	30.18	28.08	28.12	28.13
Dendrobium_GLEAN_10005633	27.04	26.92	26.94	26.57	26.64	26.58	32.69	33.01	32.5	29.64	29.62	29.74
Dendrobium_GLEAN_10069896	26.16	26.17	26.06	24.15	24.09	24.09	25.5	25.68	25.65	24.28	24.25	24.25
Novel00587	33.13	32.94	33.28	30.82	30.54	31.02	31.71	31.94	30.92	32.42	31.26	31.13
Novel01395	31.78	31.18	32.42	28.69	28.73	28.66	29.69	29.69	29.79	28.26	28.19	28.22
